# Supplementary material for: Active machine learning-driven experimentation to determine compound effects on protein patterns
Source: eLife. 2016 Feb 3;5:e10047. doi: 10.7554/eLife.10047 (PMC4798950; doi:10.7554/eLife.10047)
Supplement: Supplementary file 1. — DOI: http://dx.doi.org/10.7554/eLife.10047.011 [file elife-10047-supp1.xlsx]

## Sheet: Sheet1
Supplementary File 1: Genes Tagged in NIH-3T3 Clones
Clone Number	RandTag identifier (Plate#Well#)	Sequenced Gene Name or Likely Insertion Point	Ensembl ID	Subcellular Location
1	GF2B10	Lmna*	ENSMUSG00000028063
				nucleus (IDA)
				nuclear envelope (IDA)
				lamin filament (IDA)
				cytoplasm (ISO)
				intermediate filament (IEA)
				nuclear matrix (ISO)
				perinuclear region of cytoplasm (ISO)
2	GF2F7	Eef1b	ENSMUSG00000025967	eukaryotic translation elongation factor 1 complex (ISS)
3	GF3F4	Rpl7	ENSMUSG00000043716	ribosome (IEA)
				cytosolic large ribosomal subunit (IDA)
				cytosolic large ribosomal subunit (ISO)
				ribonucleoprotein complex (ISO)
4	GF3B4	Pdlim5	ENSMUSG00000028273	cytoplasm (IEA)
				cytosol (ISO)
				plasma membrane (IEA)
				postsynaptic density (ISO)
				actin cytoskeleton (ISO)
				membrane (ISO)
				Z disc (IDA)
				cell junction (IEA)
				neuron projection (IEA)
				synapse (IEA)
				postsynaptic membrane (IEA)
5	GF2E11	Cald1	ENSMUSG00000029761	membrane (IDA)
				actin cap (IDA)
6	GF3C7	Lmna*	ENSMUSG00000028063	nucleus (IDA)
				nucleus (ISO)
				nuclear envelope (IDA)
				nuclear envelope (ISO)
				lamin filament (IDA)
				cytoplasm (ISO)
				intermediate filament (IEA)
				nuclear matrix (ISO)
				perinuclear region of cytoplasm (ISO)
7	GG3B7	Capza1	ENSMUSG00000070372	cytoplasm (IEA)
				cytoskeleton (IEA)
				F-actin capping protein complex (IDA)
				membrane (IDA)
				cortical cytoskeleton (IDA)
				WASH complex (ISO)
8	GF2E6	Rtn4	ENSMUSG00000020458
9	GF3E8	Cap1	ENSMUSG00000028656	cytoplasm (IDA)
				plasma membrane (IEA)
				membrane (IEA)
				cortical actin cytoskeleton (IDA)
10	GF3G5	Hnrnpm	ENSMUSG00000059208	nucleus (ISO)
				nucleoplasm (ISO)
				spliceosomal complex (ISO)
				nuclear matrix (ISO)
				ribonucleoprotein complex (IEA)
				paraspeckles (ISO)
				catalytic step 2 spliceosome (ISO)
11	GH2E8	P4ha2	ENSMUSG00000018906	collagen (IEA)
				endoplasmic reticulum (IEA)
12	GH1C3	Hgf	ENSMUSG00000028864	extracellular space (ISO)
13	GH2E4	Ergic1	ENSMUSG00000001576	endoplasmic reticulum (IEA)
				endoplasmic reticulum-Golgi intermediate compartment (ISO)
				Golgi apparatus (IEA)
				membrane (IEA)
				integral to membrane (IEA)
14	GH1D5	Chr8:124471931-124472451 -
15	GH2D6	Ssr4	ENSMUSG00000002014	endoplasmic reticulum (IEA)
				Sec61 translocon complex (ISO)
				membrane (IEA)
				integral to membrane (IEA)
				integral to membrane (IEA)
16	GH1C8	Eif3a	ENSMUSG00000024991	nucleus (ISO)
				nucleolus (ISO)
				cytoplasm (ISO)
				eukaryotic translation initiation factor 3 complex (IDA)
				eukaryotic translation initiation factor 3 complex (ISO)
				cytoskeleton (IEA)
17	GG1E5	Dkc1	ENSMUSG00000031403	nucleus (ISO)
				telomerase holoenzyme complex (ISO)
				nucleolus (IC)
				nucleolus (TAS)
				ribonucleoprotein complex (IEA)
18	GF2F3	Rp23a
19	GG3D10	Chr15:76390245-76390373 -
20	GH3F9	Efemp1	ENSMUSG00000020467	extracellular region (IEA)
				proteinaceous extracellular matrix (IEA)
				extracellular space (ISO)
				extracellular matrix (ISO)
21	GH1E6	Set	ENSMUSG00000054766	nucleus (IDA)
				nucleus (ISO)
				cytoplasm (ISO)
				endoplasmic reticulum (ISO)
				protein complex (ISO)
				perinuclear region of cytoplasm (ISO)
22	GH1B7	Serbp1	ENSMUSG00000036371	nucleus (IEA)
				cytoplasm (ISO)
				plasma membrane (ISO)
23	GH3E7	Fa2h	ENSMUSG00000033579	endoplasmic reticulum (IDA)
				membrane (IEA)
				integral to membrane (IEA)
				intracellular membrane-bounded organelle (IEA)
24	GH2D4	Atp5b	ENSMUSG00000025393	mitochondrial proton-transporting ATP synthase complex, catalytic core F(1) (ISO)
				mitochondrion (IDA)
				mitochondrion (ISO)
				mitochondrial inner membrane (IDA)
				mitochondrial inner membrane (ISO)
				mitochondrial proton-transporting ATP synthase complex (ISO)
				mitochondrial proton-transporting ATP synthase complex (ISO)
				plasma membrane (ISO)
				cell surface (ISO)
				membrane (IEA)
				mitochondrial membrane (ISO)
				proton-transporting two-sector ATPase complex, catalytic domain (IEA)
				mitochondrial nucleoid (ISO)
				proton-transporting ATP synthase complex, catalytic core F(1) (ISO)
25	GH3C6	Myh9	ENSMUSG00000022443	stress fiber (ISO)
				stress fiber (IDA)
				ruffle (ISO)
				immunological synapse (ISO)
				immunological synapse (IDA)
				uropod (ISO)
				uropod (IDA)
				nucleus (ISO)
				cytoplasm (IDA)
				cytoplasm (ISO)
				endosome (ISO)
				spindle (IDA)
				actomyosin contractile ring (ISO)
				cytosol (ISO)
				cytoskeleton (IEA)
				plasma membrane (ISO)
				plasma membrane (IDA)
				cell-cell adherens junction (IDA)
				cell cortex (IDA)
				cell cortex (IDA)
				COP9 signalosome (ISO)
				integrin complex (ISO)
				actin cytoskeleton (ISO)
				lateral plasma membrane (ISO)
				myosin complex (IDA)
				myosin complex (IDA)
				myosin complex (IDA)
				myosin II complex (IDA)
				cortical cytoskeleton (IDA)
				cell leading edge (ISO)
				neuromuscular junction (IDA)
				cleavage furrow (ISO)
				protein complex (ISO)
				protein complex (ISO)
				phagocytic vesicle (ISO)
				extracellular vesicular exosome (ISO)
26	GO2B8	Cbx5	ENSMUSG00000009575	histone deacetylase complex (IDA)
				chromosome, centromeric region (IEA)
				kinetochore (IDA)
				heterochromatin (IDA)
				nucleus (IDA)
				nucleus (ISO)
				chromosome (IEA)
				nuclear heterochromatin (IDA)
				nuclear heterochromatin (IDA)
				nuclear heterochromatin (IDA)
				nucleolus (IDA)
				nucleolus (ISO)
				cytoplasm (ISO)
				chromocenter (IDA)
				chromocenter (IDA)
				PML body (ISO)
				transcriptional repressor complex (IDA)
				histone methyltransferase complex (IDA)
27	GO1B9	Ddx17	ENSMUSG00000055065	nucleus (ISO)
28	GO1C11	Snd1	ENSMUSG00000001424	nucleus (IEA)
				cytoplasm (ISO)
				mitochondrion (IDA)
				RNA-induced silencing complex (IEA)
29	GN1B6	Rps27a	ENSMUSG00000020460	intracellular (IEA)
				nucleus (IEA)
				cytoplasm (IEA)
				ribosome (IEA)
				ribosome (IEA)
				cytosolic small ribosomal subunit (ISO)
				ribonucleoprotein complex (IEA)
30	GO1C4	Chr10:65817594-65817721 -
31	GO2F8	Chr11:100406488-100406634 +
32	GP1F9	Col4a2	ENSMUSG00000031503	extracellular region (IEA)
				proteinaceous extracellular matrix (IEA)
				collagen (IEA)
				collagen (IEA)
				collagen type IV (IDA)
				basement membrane (IDA)
				basement membrane (IDA)
				basement membrane (IDA)
				extracellular matrix (ISO)
33	GP2E9	Rpl36a	ENSMUSG00000079435	cytosolic large ribosomal subunit (ISO)
34	GP2B4	Actn4	ENSMUSG00000054808	stress fiber (IDA)
				stress fiber (ISO)
				nucleus (ISO)
				cytoplasm (IDA)
				cytoplasm (ISO)
				Z disc (IDA)
				Z disc (IDA)
				ribonucleoprotein complex (ISO)
				cortical cytoskeleton (IDA)
				pseudopodium (IDA)
				protein complex (ISO)
				perinuclear region of cytoplasm (ISO)
				extracellular vesicular exosome (ISO)
35	GP2B5	Bag3	ENSMUSG00000030847	cytoplasm (ISO)
				cytosol (ISO)
				plasma membrane (ISO)
				Z disc (IDA)
				neuron projection (ISO)
36	GT2D5	Ssr4	ENSMUSG00000002014	endoplasmic reticulum (IEA)
				Sec61 translocon complex (ISO)
				membrane (IEA)
				integral to membrane (IEA)
				integral to membrane (IEA)
37	GG3C11	Nhp2l1	ENSMUSG00000063480	plasma membrane (ISS)
38	GR1G4	Chr4 146060289 146060356 -
39	GT2G8	Chr17:25999767-25999947 +
40	GT2D6	Nop2	ENSMUSG00000038279	nucleus (ISO)
				nucleolus (ISO)
41	GT1E9	Copg	ENSMUSG00000030058[copg1]	Golgi membrane (ISO)
				nucleus (ISO)
				cytoplasm (ISO)
				Golgi apparatus (ISO)
				membrane (IEA)
				membrane coat (IEA)
				COPI vesicle coat (IEA)
				cytoplasmic vesicle (IEA)
42	GQ1D11	Chr2:22923292-22923324
43	GT2C4	Timm23	ENSMUSG00000013701	mitochondrion (IDA)
				mitochondrion (IDA)
				mitochondrion (IDA)
				mitochondrion (ISO)
				mitochondrial inner membrane (IDA)
				mitochondrial inner membrane (ISO)
				mitochondrial inner membrane presequence translocase complex (ISO)
				mitochondrial intermembrane space (ISO)
				integral to mitochondrial inner membrane (ISO)
44	GH1D8	Rps27a*	ENSMUSG00000020460	intracellular (IEA)
				nucleus (IEA)
				cytoplasm (IEA)
				ribosome (IEA)
				ribosome (IEA)
				cytosolic small ribosomal subunit (ISO)
				ribonucleoprotein complex (IEA)
45	GQ1C3	Kdm2b	ENSMUSG00000029475	nucleus (IEA)
				PcG protein complex (ISO)
46	3T3WT	(Untagged)	N/A	N/A
47	GT2B5	filamin-B(Flnb)	ENSMUSG00000025278	stress fiber (IDA)
				cytoplasm (ISA)
				cytoplasm (ISO)
				cytoskeleton (IEA)
				plasma membrane (ISO)
				focal adhesion (IDA)
48	GQ1D6	Cyb5r3	ENSMUSG00000018042	cytoplasm (IEA)
				mitochondrion (IEA)
				mitochondrial outer membrane (IEA)
				mitochondrial inner membrane (IDA)
				endoplasmic reticulum (ISO)
				endoplasmic reticulum membrane (ISO)
				lipid particle (ISO)
				membrane (IEA)
X1	GT1E10	chr7:94059178-94059308 -
X2	GR1G8	Q7TMN5
X3	GT2E7	Q9EPC1	ENSMUSG00000030770	nucleus (IDA)
				cytoplasm (IDA)
				cytoplasm (ISO)
				cytoskeleton (IEA)
				plasma membrane (IEA)
				focal adhesion (IDA)
				focal adhesion (IDA)
				focal adhesion (ISO)
				actin cytoskeleton (ISO)
				membrane (IEA)
				lamellipodium (IDA)
				cell junction (IEA)
				protein complex (ISO)
X4	GT1G6	Q9DCN2[cyb5r3]	ENSMUSG00000018042	cytoplasm (IEA)
				mitochondrion (IEA)
				mitochondrial outer membrane (IEA)
				mitochondrial inner membrane (IDA)
				endoplasmic reticulum (ISO)
				endoplasmic reticulum membrane (ISO)
				lipid particle (ISO)
				membrane (IEA)
X5	GT1E2	chr7:48212941-48213170 -
X7	GR1C7	indeterminate
# Sequence information, insertion position, other annotation and example images can be obtained from http://pslid.org by following the “PSLID RandTag Release 2” link.
* These clones were tagged in different introns.
