# Supplementary material for: Active machine learning-driven experimentation to determine compound effects on protein patterns
Source: eLife. 2016 Feb 3;5:e10047. doi: 10.7554/eLife.10047 (PMC4798950; doi:10.7554/eLife.10047)
Supplement: Supplementary file 3. — An image classifier was trained using the pattern labels of Figure 5 and applied to those images in each group in Figure 4. The label assigned with the highest frequency is shown, and any additional labels that were assigned with a probability greater than 15% are also shown. DOI: http://dx.doi.org/10.7554/eLife.10047.013 [file elife-10047-supp3.xls]

## Sheet: Sheet1
Phenotype group from Figure 4	Majority label from Figure 5	Additional labels from Figure 5 assigned with at least 15% probability
1	ER	nucleoplasm and cytoplasm
2	nucleoplasm and cytoplasm	mitochondria
3	nucleoli
4	nucleoplasm
5	ER	mitochondria
6	ER
7	mitochondria
8	cytoskeleton
9	ER	nucleoli and cytoplasm & plasma membrane
10	nucleoplasm and cytoplasm
11	structured cytoplasm	cytoskeleton
12	structured cytoplasm	ER & nucleoplasm
13	nucleoli	cytoskeleton & structured cytoplasm
14	focal
15	uniform cytoplasm	nucleoplasm and cytoplasm & structured cytoplasm
16	mitochondria	nucleoplasm
17	nucleoli and cytoplasm	cytoskeleton
18	nucleoli	nucleoplasm
