# Supplementary material for: Active machine learning-driven experimentation to determine compound effects on protein patterns
Source: eLife. 2016 Feb 3;5:e10047. doi: 10.7554/eLife.10047 (PMC4798950; doi:10.7554/eLife.10047)
Supplement: Supplementary file 4. — DOI: http://dx.doi.org/10.7554/eLife.10047.014 [file elife-10047-supp4.xls]

## Sheet: mean features
Drug ID	Clone ID	Human-Assigned Class for Unperturbed Experiment	Within-phenotype adjusted distance to unperturbed	z-scored SLF34.1	z-scored SLF34.2	z-scored SLF34.3	z-scored SLF34.4	z-scored SLF34.5	z-scored SLF34.6	z-scored SLF34.7	z-scored SLF34.8	z-scored SLF34.9	z-scored SLF34.10	z-scored SLF34.11	z-scored SLF34.12	z-scored SLF34.13	z-scored SLF34.14	z-scored SLF34.15	z-scored SLF34.16	z-scored SLF34.17	z-scored SLF34.18	z-scored SLF34.19	z-scored SLF34.20	z-scored SLF34.21	z-scored SLF34.22	z-scored SLF34.23	z-scored SLF34.24	z-scored SLF34.25	z-scored SLF34.26	z-scored SLF34.27	z-scored SLF34.28	z-scored SLF34.29	z-scored SLF34.30	z-scored SLF34.31	z-scored SLF34.32	z-scored SLF34.33	z-scored SLF34.34	z-scored SLF34.35	z-scored SLF34.36	z-scored SLF34.37	z-scored SLF34.38	z-scored SLF34.39	z-scored SLF34.40	z-scored SLF34.41	z-scored SLF34.42	z-scored SLF34.43	z-scored SLF34.44	z-scored SLF34.45	z-scored SLF34.46
1	1	nucleoplasm	0.308488	0.293105	-0.32733	0.512266	0.160204	0.382428	-0.012649	-0.236954	-0.271419	0.342568	-0.327505	-0.472107	0.330798	0.335104	-0.276892	0.522743	0.152748	0.431285	-0.0489917	-0.276304	-0.311515	0.416217	-0.390852	-0.637898	0.304385	0.340407	-0.209394	0.545752	0.202904	0.421676	-0.0366862	-0.276656	-0.306121	0.417638	-0.37588	-0.667977	0.258755	0.336977	-0.12715	0.517828	0.21544	0.395007	-0.0350036	-0.269772	-0.292706	0.395242	-0.337768
1	2	structured cytoplasm	0.335522	0.755359	-0.426796	0.592282	-0.283961	0.696115	-0.538907	-0.743788	-0.736403	0.747022	-0.738145	-0.865836	-0.296634	0.751892	-0.379938	0.596179	-0.343675	0.654303	-0.551849	-0.740569	-0.722774	0.725613	-0.709456	-0.85589	-0.357099	0.748344	-0.394979	0.649603	-0.346949	0.641625	-0.545887	-0.736782	-0.715048	0.714909	-0.699221	-0.828072	-0.415618	0.747404	-0.436851	0.664957	-0.338888	0.645078	-0.539005	-0.734119	-0.712814	0.717658	-0.704387
1	3	nucleoli and cytoplasm	0.177719	-0.22042	-0.214499	0.461439	0.463686	-0.0120177	0.557212	0.293152	0.223296	-0.121423	0.0808186	-0.294955	0.669288	-0.144654	-0.196961	0.504873	0.426178	0.0727598	0.462528	0.234842	0.161036	-0.0194063	-0.000265241	-0.45276	0.640141	-0.121161	-0.146277	0.570995	0.380442	0.0436041	0.412613	0.212785	0.155582	-0.0257181	0.0333568	-0.475821	0.582591	-0.119561	-0.0650734	0.595847	0.388517	-0.0204458	0.407638	0.21437	0.175582	-0.0668731	0.102171
1	4	cytoskeleton	0.308861	-1.51764	0.937641	-1.19424	0.30133	-1.79722	1.30615	1.49264	1.61252	-1.64645	1.61862	1.30807	0.625883	-1.49364	0.560614	-0.939915	0.32653	-1.55844	1.29809	1.46062	1.50772	-1.55135	1.45297	1.21607	0.748187	-1.46149	0.460897	-0.655189	0.335667	-1.41297	1.2914	1.43417	1.43994	-1.46217	1.33952	1.04399	0.855297	-1.48604	0.764203	-0.233939	0.801241	-1.496	1.63255	1.53076	1.5388	-1.5	1.42606
1	5	cytoskeleton	0.474166	-1.99045	0.101589	0.372611	1.41877	-1.34004	2.8856	1.98676	1.83807	-1.59797	1.23118	0.116071	1.31534	-1.69163	0.118425	0.373572	1.37125	-0.933927	2.60186	1.76794	1.5762	-1.1915	0.95086	-0.0436867	1.22406	-1.5986	0.286676	0.393861	1.35146	-0.949469	2.4948	1.70154	1.53706	-1.15313	0.998434	-0.043582	1.15995	-1.57269	0.43911	0.412624	1.32412	-1.05411	2.40511	1.68028	1.54746	-1.20822	1.09712
1	6	nucleoplasm	0.614691	-0.0879826	-0.270389	0.552885	1.44653	0.193428	0.975367	0.167712	0.0821271	0.0670397	-0.126458	-0.528847	0.517108	0.00838457	-0.168345	0.49362	1.25204	0.262033	0.780599	0.0723373	-0.00722566	0.184785	-0.191321	-0.647957	0.436773	0.0263417	-0.0123271	0.528854	1.25651	0.200197	0.742429	0.0617936	0.00591362	0.146258	-0.11257	-0.612415	0.371037	0.0245819	0.243245	0.575742	1.30131	0.115116	0.740726	0.0711824	0.0356841	0.0843908	-0.0102805
1	7	structured cytoplasm	0.077564	-0.532884	0.35734	-0.0112878	0.940853	-0.620285	1.03665	0.646045	0.675067	-0.609688	0.672341	0.455011	0.622363	-0.476515	0.173271	0.164731	1.06285	-0.447505	1.01555	0.59922	0.584041	-0.502671	0.530674	0.228495	0.682636	-0.453119	0.14629	0.3393	1.06019	-0.379384	0.974727	0.575257	0.54251	-0.452237	0.475619	0.067451	0.701352	-0.447441	0.172582	0.474533	1.08317	-0.379254	0.961368	0.569648	0.537972	-0.446367	0.478337
1	8	ER	0.128581	0.207091	-0.35282	0.490207	-0.151137	0.41262	-0.121034	-0.154621	-0.228822	0.356089	-0.365654	-0.602541	0.486664	0.237838	-0.297594	0.460931	-0.209895	0.35922	-0.174544	-0.17745	-0.227034	0.330427	-0.31206	-0.51623	0.399539	0.240907	-0.272062	0.456372	-0.214462	0.295693	-0.183701	-0.178441	-0.209129	0.27487	-0.239101	-0.394758	0.312759	0.235259	-0.244623	0.399889	-0.23154	0.245216	-0.196304	-0.174122	-0.193721	0.233014	-0.181437
1	9	plasma membrane	0.625573	-0.872003	1.46939	-1.91299	0.053093	-1.22016	0.475845	0.862409	0.951535	-1.05918	1.17598	1.39366	-0.0448861	-1.08131	1.12036	-2.11081	0.0369826	-1.36255	0.548576	0.995927	1.08508	-1.26089	1.29396	1.43803	0.0753136	-1.12526	0.92276	-2.00103	-0.0012134	-1.3187	0.519143	0.999185	1.06953	-1.26655	1.23696	1.41977	0.210031	-1.16326	0.793178	-1.49483	0.0224401	-1.30452	0.552359	1.02278	1.07936	-1.27417	1.20506
1	10	nucleoplasm	0.0898752	0.917851	-0.45283	0.613812	-0.491121	0.792199	-0.745814	-0.961878	-0.925308	0.88233	-0.897978	-1.00118	-1.02236	0.89944	-0.39482	0.57561	-0.518217	0.734826	-0.72904	-0.940754	-0.895617	0.841587	-0.850008	-0.911102	-1.08432	0.890272	-0.415816	0.579571	-0.537784	0.730995	-0.722518	-0.930302	-0.886181	0.837418	-0.854238	-0.864325	-1.11668	0.888642	-0.44718	0.498594	-0.539806	0.745858	-0.71568	-0.926444	-0.886603	0.849254	-0.875775
1	11	ER	0.18392	0.576182	-0.304429	0.23528	-0.470364	0.456626	-0.525742	-0.531406	-0.511001	0.505893	-0.427293	-0.00179341	-0.167258	0.557789	-0.295389	0.290698	-0.468446	0.453106	-0.51123	-0.512429	-0.498008	0.492727	-0.42792	-0.0846939	-0.116671	0.548806	-0.308238	0.326418	-0.44468	0.444367	-0.495332	-0.503234	-0.490415	0.485521	-0.422234	-0.0784275	-0.132784	0.53981	-0.321072	0.302942	-0.43396	0.435804	-0.487264	-0.494025	-0.481951	0.477096	-0.410479
1	12	nucleoplasm and cytoplasm	0.134472	0.0746483	-0.109823	0.385371	0.70889	0.0628459	0.447214	0.0298327	0.024118	0.0414032	0.0238786	-0.0640048	0.521807	0.129749	-0.179538	0.531066	0.817605	0.192833	0.42277	-0.0201648	-0.0545615	0.150435	-0.110551	-0.38879	0.571979	0.146489	-0.206821	0.716591	0.84684	0.24462	0.411957	-0.034944	-0.0809753	0.200115	-0.165004	-0.651059	0.585777	0.151815	-0.253893	0.849077	0.829262	0.260578	0.389078	-0.0417677	-0.0904444	0.216193	-0.18201
1	13	ERGIC	0.456707	0.209717	-0.0913986	0.208974	0.176419	0.116749	0.0538699	-0.118479	-0.0970829	0.132987	-0.0275537	0.14718	0.362668	0.239902	-0.149158	0.396352	0.408681	0.193525	0.121019	-0.141104	-0.142048	0.185606	-0.103385	-0.0930768	0.430407	0.246591	-0.181548	0.552512	0.375763	0.232446	0.0945916	-0.150766	-0.163658	0.21428	-0.142487	-0.278878	0.443064	0.247857	-0.182764	0.654815	0.41313	0.234382	0.102996	-0.150722	-0.163805	0.219661	-0.142943
1	14	ER	0.165597	0.762191	-0.42023	0.549969	-0.413512	0.682898	-0.61041	-0.761091	-0.745778	0.739154	-0.722939	-0.706342	-0.436629	0.754177	-0.370401	0.534094	-0.445152	0.641859	-0.608299	-0.751521	-0.727673	0.715284	-0.696285	-0.715804	-0.475598	0.748531	-0.383574	0.556815	-0.445837	0.628988	-0.600433	-0.745436	-0.719262	0.705536	-0.688246	-0.68258	-0.524903	0.746263	-0.417518	0.535073	-0.450323	0.631484	-0.596377	-0.741842	-0.71664	0.707957	-0.693378
1	15	ER	0.126647	0.137797	-0.363785	0.53194	-0.0263332	0.38009	0.0135326	-0.0828948	-0.165971	0.296191	-0.323282	-0.643572	0.567078	0.182437	-0.273741	0.461137	-0.0768922	0.287889	-0.0478807	-0.116213	-0.157118	0.245412	-0.230288	-0.459958	0.43169	0.190381	-0.221526	0.445485	-0.083226	0.215541	-0.0613627	-0.122998	-0.141866	0.195664	-0.153799	-0.330722	0.337982	0.185477	-0.157686	0.402436	-0.0664457	0.161608	-0.0581925	-0.116184	-0.123228	0.156535	-0.0933244
1	16	structured cytoplasm	0.373016	-1.28323	0.652952	-1.33646	-0.161522	-1.4388	0.413537	1.2312	1.27809	-1.42664	1.41631	1.56101	0.527862	-1.3903	0.378629	-1.10552	-0.192676	-1.35082	0.370678	1.26033	1.26984	-1.47918	1.37206	1.56499	0.662394	-1.39057	0.22771	-0.738713	-0.187742	-1.21844	0.34719	1.23202	1.20766	-1.41314	1.25471	1.39862	0.809203	-1.38599	0.067308	-0.267706	-0.183758	-1.09081	0.333507	1.20946	1.15834	-1.33639	1.13368
1	17	nucleoli	0.421146	1.07516	-0.458969	0.375096	-0.949982	0.865135	-1.08725	-1.20024	-1.12595	0.992331	-1.03901	-0.331361	-2.53709	1.06398	-0.389476	-0.215693	-0.973152	0.82726	-1.04001	-1.17561	-1.0986	0.977527	-1.03102	-0.439704	-2.50347	1.04725	-0.395304	-1.32056	-0.973623	0.839848	-1.01624	-1.15473	-1.08666	0.982158	-1.05828	-0.308428	-2.44663	1.04535	-0.413344	-2.64426	-0.975671	0.872233	-1.0021	-1.14999	-1.09117	1.00551	-1.10626
1	18	nucleoli	0.251694	0.938847	-0.455158	0.464433	-0.868927	0.796374	-0.945201	-0.997537	-0.955464	0.897595	-0.906923	-0.735972	-1.21332	0.905555	-0.391594	0.14788	-0.886927	0.723216	-0.910701	-0.956212	-0.904677	0.838265	-0.83763	-0.329319	-1.28776	0.889863	-0.397424	-0.413025	-0.885365	0.714548	-0.89289	-0.939081	-0.889693	0.828561	-0.834437	-0.0330275	-1.34933	0.881245	-0.403839	-1.1081	-0.878723	0.723494	-0.878636	-0.928063	-0.88434	0.832518	-0.844551
1	19	nucleoli	0.299011	0.904772	-0.457967	0.362107	-0.929214	0.775094	-1.05746	-1.06801	-1.0111	0.839247	-0.916668	-0.0488607	-2.18737	0.981136	-0.398468	0.04863	-0.952537	0.785229	-1.01905	-1.10022	-1.03385	0.90636	-0.961018	-0.269992	-2.16633	0.988787	-0.413644	-0.660192	-0.953238	0.810429	-0.997959	-1.09746	-1.03761	0.934429	-1.00601	-0.329012	-2.12848	0.993366	-0.43659	-1.59798	-0.953479	0.845347	-0.984202	-1.09698	-1.04571	0.962803	-1.05512
1	20	ER	0.388715	0.542962	-0.329139	0.0443989	-0.685267	0.424082	-0.723365	-0.577007	-0.556691	0.463819	-0.440999	0.301948	-0.783196	0.484419	-0.343127	0.163422	-0.694122	0.404814	-0.709182	-0.557199	-0.536545	0.408592	-0.431766	0.246163	-0.762887	0.500188	-0.403094	0.305928	-0.676068	0.440366	-0.697163	-0.580105	-0.56269	0.439224	-0.482823	0.110883	-0.744126	0.50734	-0.491095	0.400987	-0.677124	0.476309	-0.693335	-0.593944	-0.580105	0.466585	-0.529463
1	21	nucleoplasm	0.38964	1.02278	-0.465842	0.637819	-0.587399	0.852085	-0.885965	-1.10588	-1.04939	0.970882	-1.00749	-1.22276	-1.64864	0.993376	-0.416988	0.610312	-0.641075	0.796309	-0.862431	-1.07107	-1.01065	0.927037	-0.96361	-1.14231	-1.6803	0.981323	-0.453778	0.618525	-0.656406	0.802363	-0.84878	-1.05657	-1.00097	0.9287	-0.982633	-1.15884	-1.67307	0.980754	-0.510518	0.516143	-0.668071	0.828312	-0.840893	-1.05385	-1.00503	0.947752	-1.02078
1	22	uniform cytoplasm	0.776286	0.61092	-0.207645	0.119691	-0.216143	0.463002	-0.458136	-0.590925	-0.565125	0.536009	-0.468017	-0.0971767	-0.468165	0.531554	-0.250964	0.264082	-0.195533	0.40773	-0.44088	-0.542087	-0.520659	0.459443	-0.431116	-0.285917	-0.395588	0.508621	-0.311166	0.470699	-0.170361	0.409287	-0.429315	-0.534582	-0.516469	0.448315	-0.446074	-0.419136	-0.370096	0.499523	-0.384845	0.63589	-0.147589	0.42258	-0.421658	-0.536201	-0.519928	0.449791	-0.465897
1	23	vesicles	0.395763	0.807023	-0.363867	0.359832	-0.534336	0.648535	-0.691965	-0.808296	-0.770066	0.734461	-0.684223	-0.280643	-0.67387	0.783003	-0.330478	0.337465	-0.553242	0.614667	-0.675101	-0.780439	-0.740877	0.705288	-0.661648	-0.28538	-0.649088	0.77384	-0.338121	0.329389	-0.513402	0.611985	-0.648759	-0.769256	-0.731499	0.704563	-0.666708	-0.262404	-0.660349	0.768747	-0.368201	0.269348	-0.518242	0.624607	-0.644374	-0.763425	-0.729997	0.712831	-0.682657
1	24	mitochondria	0.251334	0.635746	-0.37479	0.466034	-0.24787	0.619281	-0.472911	-0.626164	-0.633688	0.656284	-0.644144	-0.587151	-0.36292	0.613091	-0.252387	0.164357	-0.35872	0.486275	-0.510204	-0.5938	-0.570056	0.553369	-0.502194	-0.0704029	-0.506873	0.594737	-0.173546	-0.173782	-0.392495	0.441547	-0.516978	-0.574478	-0.543218	0.517425	-0.454503	0.2267	-0.590328	0.58034	-0.0962705	-0.446127	-0.415294	0.424396	-0.521364	-0.560963	-0.530551	0.503484	-0.434187
1	25	cytoskeleton	0.103837	-0.373848	-0.364555	0.501039	-0.173774	0.184933	0.213752	0.338747	0.193342	0.0030734	-0.126674	-0.605091	0.793921	-0.247828	-0.311402	0.467019	-0.227362	0.216378	0.121388	0.229685	0.117795	0.0964516	-0.160774	-0.648793	0.690425	-0.214359	-0.292861	0.473249	-0.211361	0.168033	0.109265	0.205783	0.116968	0.0621065	-0.105225	-0.661515	0.623391	-0.206966	-0.300642	0.481122	-0.19265	0.11874	0.117609	0.203807	0.129075	0.0176942	-0.0519485
1	26	nucleoplasm	0.546897	-0.863208	0.552646	-1.95193	-0.502958	-1.06113	-0.123183	0.738617	0.789992	-1.03152	1.03772	1.82419	-0.246132	-1.07091	0.263105	-1.75885	-0.577061	-1.10999	-0.142738	0.811222	0.852745	-1.20647	1.08233	1.92333	-0.105535	-1.07465	0.123539	-1.44583	-0.588965	-1.01346	-0.153324	0.776482	0.799388	-1.16099	0.98146	1.87084	0.040288	-1.0576	0.0148602	-0.933896	-0.555943	-0.910592	-0.132437	0.746187	0.752889	-1.08967	0.881054
1	27	nucleoli	0.156014	0.512423	-0.385259	0.472577	-0.352837	0.515876	-0.425479	-0.474965	-0.486986	0.51529	-0.485472	-0.482177	0.12429	0.524494	-0.344467	0.490248	-0.321857	0.518854	-0.409891	-0.483523	-0.493551	0.536481	-0.505128	-0.582415	0.109618	0.523579	-0.345006	0.50854	-0.320577	0.506145	-0.405046	-0.481527	-0.487361	0.530742	-0.492458	-0.571025	0.0539255	0.520702	-0.338192	0.515961	-0.253187	0.482267	-0.373318	-0.472864	-0.474155	0.512784	-0.461811
1	28	structured cytoplasm	0.36097	-0.439857	0.426188	-0.718508	-0.0561871	-0.593404	0.167239	0.498876	0.531456	-0.565423	0.668558	0.947112	0.390562	-0.522936	0.300136	-0.478618	0.0307202	-0.600124	0.225748	0.557523	0.571094	-0.62676	0.677872	0.841168	0.520935	-0.5404	0.218577	-0.255886	0.0361857	-0.567293	0.227539	0.559637	0.56	-0.61628	0.640062	0.712769	0.600078	-0.541376	0.153979	0.0102628	0.084013	-0.538163	0.23636	0.551409	0.546418	-0.600646	0.610678
1	29	nucleoplasm and cytoplasm	0.295059	-1.04707	1.83353	-2.49834	0.0919854	-1.4167	0.418692	0.970268	1.06192	-1.25876	1.36753	1.66391	-0.252475	-1.3942	2.20237	-2.76629	0.344298	-1.90857	0.784387	1.30915	1.45466	-1.65352	1.77497	1.7409	-0.0346678	-1.51137	2.1158	-2.60363	0.355723	-2.01261	0.853783	1.39763	1.54907	-1.74854	1.81829	1.71486	0.187372	-1.55225	1.94706	-1.89076	0.38402	-2.02641	0.908742	1.42953	1.57349	-1.76098	1.78362
1	30	mitochondria	0.239473	0.569978	-0.385158	0.315753	-0.573222	0.557718	-0.62517	-0.569644	-0.573229	0.575896	-0.555364	-0.364442	-0.19301	0.561588	-0.29597	0.0185467	-0.609783	0.479328	-0.622224	-0.557886	-0.540341	0.518391	-0.474521	-0.0588673	-0.310464	0.545384	-0.255135	-0.292388	-0.593347	0.441233	-0.601504	-0.538963	-0.516021	0.485952	-0.430561	0.164034	-0.376048	0.53682	-0.226059	-0.51824	-0.583528	0.431181	-0.59066	-0.530851	-0.509023	0.477118	-0.417039
1	31	cytoskeleton	0.345439	0.00669827	-0.313176	0.469952	0.0547661	0.233368	0.124012	0.0286978	-0.0367441	0.141508	-0.169897	-0.432016	0.606325	0.0817468	-0.294932	0.523303	0.0470084	0.31289	0.0751216	-0.0389145	-0.104424	0.249141	-0.258258	-0.621105	0.573925	0.102257	-0.283835	0.601599	0.0528964	0.31098	0.0635275	-0.0560514	-0.113958	0.259109	-0.252324	-0.702174	0.524952	0.107953	-0.28366	0.651849	0.0670938	0.286814	0.0667274	-0.0574943	-0.106778	0.238019	-0.221229
1	32	focal	0.34228	-0.596741	-0.135771	0.011674	-0.215616	-0.345306	0.168285	0.568158	0.508974	-0.501444	0.41177	0.323369	0.717466	-0.535272	-0.132972	-0.0450212	-0.236475	-0.240809	0.110392	0.513285	0.443197	-0.407863	0.336706	0.338376	0.673891	-0.523806	-0.0879578	-0.189439	-0.252304	-0.262477	0.0850376	0.499363	0.43784	-0.414638	0.371194	0.431388	0.613371	-0.536325	-0.0638104	-0.259628	-0.266199	-0.31557	0.0672792	0.502844	0.452408	-0.458865	0.429975
1	33	nucleoli	0.105657	0.557343	-0.411386	0.489178	-0.557954	0.593172	-0.56671	-0.546216	-0.566705	0.605643	-0.596374	-0.65004	-0.0402307	0.56055	-0.366195	0.425825	-0.596599	0.548488	-0.574976	-0.543346	-0.548744	0.582619	-0.560793	-0.55149	-0.0986561	0.560117	-0.373104	0.312242	-0.596805	0.525321	-0.571054	-0.542986	-0.541219	0.565733	-0.53689	-0.445435	-0.175445	0.557525	-0.395292	0.137865	-0.607792	0.512942	-0.572221	-0.541288	-0.536189	0.554832	-0.521314
1	34	uniform cytoplasm	0.421354	-1.10583	-0.0503864	0.337973	1.12348	-0.543085	1.59614	1.20315	1.03975	-0.810807	0.66773	-0.00361482	1.38403	-0.947806	-0.0322979	0.39136	1.08926	-0.367948	1.41781	1.08087	0.911248	-0.59957	0.533521	-0.151041	1.33149	-0.900891	0.082229	0.457244	1.05931	-0.414308	1.34823	1.04475	0.905236	-0.61004	0.601228	-0.150355	1.27334	-0.899398	0.288677	0.490041	1.12554	-0.543017	1.35674	1.0546	0.950265	-0.704743	0.744293
1	35	uniform cytoplasm	0.367825	-0.387679	0.45201	-0.784921	-0.202566	-0.629475	-0.045929	0.397051	0.436213	-0.54908	0.630686	1.11039	-0.111895	-0.576816	0.247776	-0.628123	-0.176454	-0.723663	-0.0416122	0.495996	0.531181	-0.727796	0.718781	1.13512	0.0146327	-0.629324	0.167525	-0.359161	-0.142507	-0.72369	-0.0171141	0.52193	0.547893	-0.756851	0.708047	1.08532	0.133896	-0.639697	0.0138388	-0.0140241	-0.155554	-0.647381	-0.0385671	0.5042	0.515373	-0.725314	0.626932
1	36	ER	0.0456204	0.341854	-0.37772	0.578975	0.231485	0.541944	-0.0286295	-0.269195	-0.347526	0.502478	-0.511508	-0.856555	0.537812	0.366129	-0.280484	0.495787	0.0481629	0.40373	-0.135824	-0.289257	-0.320214	0.398391	-0.352994	-0.512692	0.353928	0.366138	-0.211791	0.437876	-0.0165324	0.330448	-0.169355	-0.289036	-0.297756	0.342857	-0.26946	-0.285246	0.232443	0.356779	-0.135557	0.337464	-0.0580084	0.285066	-0.18935	-0.280323	-0.279428	0.309744	-0.216017
1	37	nucleoli	0.320074	1.01536	-0.412459	0.44527	-0.638882	0.822166	-0.910694	-1.08954	-1.02995	0.949067	-0.956898	-0.622425	-1.59704	0.975538	-0.282539	-0.0762102	-0.711002	0.749321	-0.889168	-1.03886	-0.974296	0.890662	-0.887825	-0.100968	-1.65938	0.954571	-0.165651	-0.999968	-0.733683	0.74755	-0.875853	-1.01268	-0.953987	0.8834	-0.8883	0.232786	-1.67123	0.946878	0.00693448	-2.13078	-0.751121	0.76601	-0.868096	-1.00157	-0.951559	0.894839	-0.90962
1	38	mitochondria	0.181027	0.162011	-0.307778	0.0868036	-0.760146	0.257057	-0.615532	-0.226498	-0.244931	0.202727	-0.245008	0.00617807	-0.156851	0.177489	-0.301193	-0.0129723	-0.785638	0.255348	-0.617445	-0.249222	-0.260931	0.203317	-0.24454	0.145689	-0.216856	0.174756	-0.322665	-0.162382	-0.763814	0.244398	-0.595269	-0.245054	-0.254828	0.195274	-0.233505	0.246254	-0.241887	0.176979	-0.386182	-0.248301	-0.754841	0.251505	-0.586706	-0.247143	-0.258127	0.199386	-0.239979
1	39	Golgi	0.744285	0.219815	-0.368457	0.442594	-0.388233	0.402507	-0.304105	-0.213574	-0.272269	0.342516	-0.363017	-0.489584	0.271771	0.248662	-0.30813	0.355492	-0.43688	0.381542	-0.340695	-0.231181	-0.272353	0.354833	-0.344566	-0.334739	0.18956	0.249647	-0.279736	0.217007	-0.45075	0.34211	-0.34921	-0.230495	-0.257972	0.325391	-0.298758	-0.168702	0.1044	0.243609	-0.239939	0.00211119	-0.463608	0.307461	-0.356864	-0.225425	-0.244926	0.293849	-0.25398
1	40	nucleoli	0.210116	0.751444	-0.435952	0.162918	-0.887177	0.682084	-0.970552	-0.928796	-0.886983	0.710213	-0.799711	-0.10285	-1.73748	0.781942	-0.344204	-0.509332	-0.905285	0.651754	-0.936898	-0.918096	-0.867368	0.718441	-0.765431	0.415539	-1.76896	0.808153	-0.297448	-1.64108	-0.902079	0.675584	-0.919999	-0.920717	-0.874003	0.757104	-0.795692	0.763069	-1.78875	0.819597	-0.234579	-2.92001	-0.902637	0.7039	-0.909312	-0.919728	-0.880175	0.786797	-0.826847
1	41	Golgi	0.146508	-0.189653	-0.130734	-0.103201	-0.363811	-0.118772	-0.170756	0.212743	0.191409	-0.192369	0.198798	0.424326	0.444785	-0.171952	-0.171784	-0.0255459	-0.370242	-0.0439304	-0.185688	0.186681	0.149372	-0.14781	0.13672	0.335107	0.473345	-0.159743	-0.195207	-0.0145294	-0.380559	-0.0196614	-0.195401	0.170233	0.131653	-0.127798	0.118077	0.27328	0.476868	-0.147887	-0.211176	-0.013098	-0.374626	-0.0122541	-0.195953	0.156535	0.121613	-0.119428	0.118092
1	42	nucleoplasm and cytoplasm	0.177104	-0.390929	0.0107409	-0.178749	-0.171019	-0.330302	0.0815803	0.419201	0.41022	-0.405203	0.419632	0.505677	0.646488	-0.358698	-0.0134442	0.0121395	0.000681026	-0.234073	0.165463	0.408356	0.37197	-0.333773	0.34549	0.341245	0.720998	-0.347713	-0.0337319	0.148784	0.0641832	-0.193394	0.186535	0.401289	0.353436	-0.299822	0.312315	0.188914	0.752404	-0.350179	-0.063214	0.314914	0.0904326	-0.196805	0.197075	0.404328	0.357783	-0.307016	0.320951
1	43	mitochondria	0.334975	-0.185817	0.0628805	-1.26972	-0.384013	-0.173522	-0.158253	0.207346	0.167043	-0.220451	0.286349	1.09362	-0.108103	-0.421397	0.00692655	-1.12533	-0.36719	-0.353179	-0.141841	0.350132	0.309693	-0.474049	0.476338	1.17519	-0.0378705	-0.472034	-0.0619291	-0.963644	-0.366931	-0.393008	-0.156936	0.336551	0.30551	-0.539909	0.501707	1.24921	-0.0143317	-0.506737	-0.0641668	-0.721611	-0.337111	-0.441697	-0.1493	0.33506	0.316295	-0.596211	0.542698
1	44	nucleoplasm and cytoplasm	0.168905	0.014634	-0.247923	0.470081	0.462133	0.145376	0.326145	0.0737621	0.0253588	0.0681444	-0.0588349	-0.322976	0.702321	0.0820281	-0.262354	0.56388	0.518071	0.267264	0.296622	0.0136485	-0.0542434	0.195832	-0.192071	-0.641473	0.719436	0.104185	-0.280582	0.711421	0.514735	0.303903	0.274032	-0.00753404	-0.0791761	0.240386	-0.232082	-0.866955	0.702956	0.114275	-0.356615	0.863092	0.458665	0.308607	0.237762	-0.0207767	-0.0895353	0.247369	-0.238362
1	45	nucleoli and cytoplasm	0.6883	-1.03864	-0.121022	0.293077	0.259464	-0.585337	0.919946	1.0509	0.928331	-0.819378	0.656546	0.0723506	1.14458	-0.905355	-0.101422	0.287992	0.205901	-0.422121	0.784966	0.950953	0.824773	-0.637171	0.523743	-0.0285102	1.09054	-0.867756	0.0142311	0.264363	0.225836	-0.478731	0.760624	0.924457	0.825698	-0.652175	0.600045	0.0321483	1.01964	-0.864427	0.157885	0.181527	0.184856	-0.573994	0.710838	0.916076	0.846859	-0.714654	0.704194
1	47	structured cytoplasm	0.786684	-1.39815	1.69779	-2.07257	0.212613	-1.66209	0.744036	1.3821	1.47207	-1.58697	1.69237	1.79847	0.40473	-1.59059	1.53786	-1.70394	0.50521	-1.86893	1.03756	1.59914	1.67797	-1.79956	1.87831	1.82608	0.625165	-1.67269	1.35939	-1.30144	0.571094	-1.88088	1.08261	1.66304	1.71691	-1.85027	1.87121	1.72229	0.820099	-1.68143	1.21469	-0.740772	0.611941	-1.83044	1.09126	1.66312	1.69634	-1.82195	1.79956
1	48	ER	0.131952	-0.0106301	-0.0172911	-0.110515	-0.215259	-0.0821637	-0.0780445	0.0922203	0.0996057	-0.0872997	0.17825	0.498963	0.342433	-0.0387108	0.0302791	-0.198361	-0.194904	-0.108459	-0.0778902	0.116826	0.122718	-0.131436	0.225028	0.608271	0.332181	-0.0640506	0.177342	-0.436496	-0.183706	-0.172006	-0.0761258	0.137334	0.150504	-0.179552	0.300066	0.79421	0.281688	-0.095971	0.421582	-0.621602	-0.127542	-0.243595	-0.0513927	0.166184	0.187513	-0.233815	0.387198
2	1	nucleoplasm	0	0.595163	-0.390084	0.5297	-0.0130691	0.569515	-0.371885	-0.623712	-0.612777	0.595217	-0.613135	-0.642577	-0.411085	0.610577	-0.333948	0.547073	-0.000775675	0.572457	-0.370556	-0.635243	-0.624484	0.617288	-0.627242	-0.761659	-0.431442	0.611109	-0.316673	0.599058	-0.0154426	0.579237	-0.374577	-0.633369	-0.623801	0.626478	-0.634379	-0.798769	-0.455468	0.613516	-0.303084	0.605362	-0.0220746	0.588809	-0.376373	-0.633225	-0.625285	0.636866	-0.642421
2	2	structured cytoplasm	0.524083	0.790315	-0.422866	0.46923	-0.606478	0.677366	-0.771128	-0.834293	-0.802901	0.737101	-0.732516	-0.262314	-0.967579	0.787322	-0.393456	0.5245	-0.589222	0.666506	-0.740044	-0.833331	-0.800819	0.732865	-0.740986	-0.356693	-0.981041	0.80152	-0.429523	0.57352	-0.585984	0.692044	-0.729901	-0.844629	-0.81495	0.762846	-0.784422	-0.485256	-0.985033	0.816622	-0.478538	0.566138	-0.563206	0.719813	-0.713044	-0.854341	-0.827563	0.791568	-0.823265
2	3	nucleoli and cytoplasm	0.800203	0.912556	-0.444619	0.603686	-0.384092	0.792022	-0.708816	-0.94753	-0.914484	0.880624	-0.894081	-1.03088	-0.901922	0.894566	-0.38861	0.57099	-0.442619	0.742129	-0.703562	-0.927909	-0.888037	0.847685	-0.857339	-1.01322	-0.951159	0.886198	-0.417383	0.602674	-0.454189	0.738347	-0.695042	-0.918184	-0.878439	0.842134	-0.860431	-0.981678	-0.987126	0.885752	-0.490597	0.690855	-0.46429	0.754392	-0.69061	-0.91619	-0.88045	0.854468	-0.883873
2	4	cytoskeleton	0.775931	0.778523	-0.419055	0.577705	-0.249057	0.703427	-0.539935	-0.776954	-0.762142	0.760795	-0.754427	-0.844257	-0.457703	0.774881	-0.375474	0.596351	-0.281679	0.677786	-0.542623	-0.773306	-0.754715	0.752922	-0.74807	-0.972313	-0.481566	0.770216	-0.388772	0.65152	-0.29221	0.670227	-0.539438	-0.767932	-0.747172	0.746882	-0.745374	-0.995876	-0.523639	0.769955	-0.457464	0.737675	-0.294726	0.672963	-0.536448	-0.766003	-0.745735	0.747834	-0.750798
2	5	cytoskeleton	0.485095	0.520168	-0.365629	0.244077	-0.479241	0.479408	-0.611129	-0.590751	-0.572369	0.495803	-0.529873	-0.458467	-0.549382	0.503895	-0.307696	0.283493	-0.439735	0.440716	-0.564116	-0.576906	-0.553116	0.467653	-0.498382	-0.466323	-0.580259	0.499905	-0.352325	0.368168	-0.438859	0.452834	-0.557671	-0.576587	-0.555923	0.474244	-0.514982	-0.483069	-0.590458	0.505864	-0.416715	0.434313	-0.434388	0.480609	-0.552667	-0.580937	-0.565342	0.49883	-0.544862
2	6	nucleoplasm	0.108231	0.860536	-0.439222	0.60611	-0.357078	0.771773	-0.648228	-0.884309	-0.862481	0.848129	-0.861009	-1.01335	-0.767772	0.845689	-0.369366	0.550296	-0.413303	0.709398	-0.649476	-0.867004	-0.833637	0.805035	-0.804009	-0.902433	-0.843005	0.836296	-0.369247	0.529822	-0.434593	0.694943	-0.646397	-0.855958	-0.820679	0.791847	-0.792353	-0.79141	-0.895877	0.832966	-0.381127	0.445122	-0.452712	0.699534	-0.64589	-0.850533	-0.817472	0.794403	-0.799277
2	7	structured cytoplasm	0.574788	0.59174	-0.256195	0.235024	-0.342896	0.428425	-0.522376	-0.626549	-0.574744	0.516651	-0.499219	-0.394032	-0.654595	0.580072	-0.280515	0.325955	-0.320572	0.434764	-0.500008	-0.62088	-0.57712	0.513812	-0.518182	-0.544459	-0.624657	0.577364	-0.33664	0.474263	-0.306445	0.467153	-0.491251	-0.619441	-0.585701	0.534194	-0.557074	-0.658971	-0.603914	0.581616	-0.408127	0.575485	-0.315865	0.505144	-0.493202	-0.624349	-0.599264	0.561616	-0.598759
2	8	ER	0.170034	0.580926	-0.363973	0.586478	1.0559	0.618832	0.077288	-0.534503	-0.558536	0.636175	-0.631442	-0.854503	0.0267627	0.598019	-0.276197	0.571442	0.783745	0.556256	-0.0344931	-0.553122	-0.556919	0.60094	-0.567934	-0.794795	-0.0718963	0.594414	-0.20946	0.600107	0.683499	0.514097	-0.0681909	-0.545672	-0.537183	0.569613	-0.519723	-0.685392	-0.146053	0.593266	-0.150478	0.62195	0.615675	0.493211	-0.090327	-0.542575	-0.529404	0.558943	-0.49566
2	9	plasma membrane	0.323268	0.732263	-0.435877	0.613546	-0.0368966	0.726616	-0.408844	-0.735238	-0.739853	0.772145	-0.797874	-1.07916	-0.515442	0.735834	-0.381547	0.606534	-0.13091	0.675704	-0.443557	-0.739227	-0.730541	0.745238	-0.755147	-1.0697	-0.586375	0.732667	-0.39856	0.665479	-0.157951	0.654104	-0.448915	-0.734328	-0.718682	0.724395	-0.733553	-1.03325	-0.637276	0.732087	-0.4373	0.70635	-0.17576	0.650957	-0.452664	-0.732189	-0.71536	0.719919	-0.731624
2	10	nucleoplasm	0.171882	0.957458	-0.448299	0.616849	-0.424261	0.813928	-0.760999	-1.01146	-0.968985	0.913763	-0.938033	-1.09953	-1.26225	0.932664	-0.385496	0.569554	-0.488042	0.744486	-0.751815	-0.982785	-0.931588	0.861619	-0.873073	-0.918386	-1.33024	0.91996	-0.386484	0.531673	-0.501914	0.738278	-0.741311	-0.966972	-0.916937	0.855968	-0.87439	-0.803686	-1.35621	0.916923	-0.391668	0.400359	-0.517652	0.754466	-0.737201	-0.96158	-0.916504	0.868968	-0.898146
2	11	ER	0.72608	-1.64279	2.05234	-2.84088	0.160648	-2.04242	0.799676	1.58379	1.69524	-1.88021	1.98236	2.14794	0.135106	-2.04988	2.39723	-2.63749	0.625815	-2.66481	1.36597	2.05873	2.2171	-2.37463	2.53436	2.27047	0.467264	-2.19833	1.99589	-2.28589	0.528068	-2.71738	1.31099	2.12984	2.27568	-2.48678	2.53893	2.25707	0.711219	-2.23942	1.79384	-1.60829	0.521102	-2.69137	1.30695	2.13958	2.27081	-2.49148	2.4801
2	12	nucleoplasm and cytoplasm	0.401587	0.555347	-0.427639	0.56194	-0.220491	0.563311	-0.59857	-0.693483	-0.668559	0.581903	-0.676492	-0.793457	-0.805978	0.58721	-0.392894	0.611802	-0.257223	0.593459	-0.599196	-0.717339	-0.700452	0.633811	-0.710564	-0.963917	-0.826191	0.596181	-0.435009	0.751205	-0.274872	0.630154	-0.597587	-0.722402	-0.712635	0.672079	-0.750014	-1.10119	-0.816727	0.608191	-0.493809	0.806865	-0.294089	0.669795	-0.599623	-0.732217	-0.729893	0.711399	-0.794832
2	13	ERGIC	0.804504	0.478284	-0.371833	0.625358	0.980382	0.555974	0.20858	-0.405619	-0.444624	0.536464	-0.540302	-0.833842	0.252796	0.509901	-0.288133	0.635717	0.880445	0.535625	0.125304	-0.440793	-0.464236	0.556537	-0.527488	-0.87569	0.164089	0.510781	-0.216264	0.710808	0.822137	0.502981	0.0941088	-0.439158	-0.448484	0.532207	-0.485377	-0.820583	0.0940803	0.509918	-0.130095	0.729603	0.768739	0.479268	0.0692544	-0.437365	-0.439607	0.512937	-0.45198
2	14	ER	0.235195	0.792992	-0.432529	0.581612	-0.272389	0.724491	-0.582952	-0.813759	-0.797482	0.781876	-0.792504	-0.748073	-0.72729	0.804202	-0.380634	0.59027	-0.332332	0.692277	-0.592165	-0.821705	-0.795412	0.777338	-0.781253	-0.942804	-0.767591	0.798358	-0.396848	0.628047	-0.335672	0.682009	-0.58597	-0.814323	-0.78565	0.767753	-0.776219	-0.952917	-0.800706	0.797278	-0.425037	0.589286	-0.330859	0.686236	-0.579483	-0.81103	-0.783832	0.770194	-0.783407
2	15	ER	0.371691	0.371381	-0.234398	0.635271	3.31933	0.527214	1.08734	-0.321066	-0.373197	0.516742	-0.545488	-0.990541	-0.0660064	0.413354	-0.050627	0.614761	2.67507	0.414307	0.806284	-0.357953	-0.370052	0.454571	-0.41397	-0.786113	-0.206709	0.411187	0.218947	0.656324	2.41453	0.345011	0.707925	-0.344743	-0.335229	0.406029	-0.333335	-0.664423	-0.266807	0.411734	0.573362	0.629388	2.24594	0.305416	0.646641	-0.34135	-0.322722	0.386713	-0.288937
2	16	structured cytoplasm	0.222711	-0.676738	1.08885	-0.489865	1.02948	-0.930214	1.02639	0.887586	0.932228	-0.85586	1.0721	1.14508	0.699714	-0.818452	0.885841	-0.173829	1.58298	-1.00331	1.23281	1.04198	1.04753	-1.00516	1.17778	1.12769	0.855065	-0.915285	0.847802	0.129544	1.87143	-1.03811	1.32103	1.12417	1.11052	-1.08925	1.22946	1.06408	0.956822	-0.933335	0.730269	0.406683	1.79021	-1.01242	1.25363	1.11461	1.09158	-1.09467	1.19969
2	17	nucleoli	0.286071	0.827715	-0.443101	0.553912	-0.633544	0.768221	-0.780246	-0.862078	-0.846378	0.848661	-0.856515	-0.972631	-0.747468	0.811885	-0.374257	0.394632	-0.696179	0.693625	-0.776877	-0.840788	-0.808946	0.7898	-0.783462	-0.737509	-0.838923	0.803404	-0.370691	0.150263	-0.714024	0.680931	-0.770831	-0.831145	-0.797825	0.774688	-0.771598	-0.621529	-0.895379	0.799334	-0.372321	-0.192039	-0.727446	0.687021	-0.767173	-0.825816	-0.795462	0.775925	-0.777875
2	18	nucleoli	0.245989	0.524526	-0.437162	0.00797976	-0.938488	0.524305	-0.957588	-0.697048	-0.678308	0.482037	-0.574776	0.215613	-1.2987	0.630964	-0.414015	0.0283677	-0.95445	0.566704	-0.938793	-0.779285	-0.747305	0.561007	-0.633712	0.296831	-1.38923	0.682318	-0.478249	0.0158465	-0.945142	0.619686	-0.924002	-0.819169	-0.788093	0.626376	-0.707712	0.268521	-1.39014	0.735002	-0.584313	0.0367169	-0.942656	0.681591	-0.91602	-0.854189	-0.827612	0.702148	-0.788013
2	19	nucleoli	0.295903	0.894644	-0.473402	0.43566	-0.992308	0.787191	-1.05172	-0.998963	-0.958336	0.852966	-0.892954	-0.125527	-1.59869	0.947552	-0.434589	0.246729	-1.00372	0.778798	-1.01162	-1.03404	-0.979694	0.893121	-0.928114	-0.495595	-1.5951	0.947876	-0.490511	-0.18659	-0.999125	0.793336	-0.990315	-1.03179	-0.981492	0.907641	-0.960122	-0.514396	-1.60735	0.954884	-0.581674	-0.696839	-0.99563	0.825711	-0.976862	-1.03629	-0.992423	0.935407	-1.00767
2	20	ER	0.440162	0.533666	-0.406801	0.525706	-0.341959	0.598292	-0.433951	-0.513149	-0.539107	0.60057	-0.594315	-0.742338	0.121444	0.55452	-0.360906	0.547429	-0.299381	0.586651	-0.402188	-0.524857	-0.54457	0.61138	-0.600635	-0.881322	0.10032	0.555956	-0.362032	0.630441	-0.199109	0.560089	-0.350594	-0.51739	-0.530488	0.586441	-0.569309	-0.91089	0.0585809	0.557208	-0.42424	0.718227	-0.180594	0.544394	-0.342314	-0.516078	-0.52519	0.570781	-0.550209
2	21	nucleoplasm	0.332105	1.03448	-0.451972	0.624956	-0.356614	0.860821	-0.847319	-1.12897	-1.06871	0.989937	-1.02468	-1.24383	-1.67102	1.00375	-0.393421	0.590538	-0.459862	0.802355	-0.833539	-1.09046	-1.02715	0.941767	-0.976374	-1.12702	-1.70386	0.990903	-0.403679	0.575322	-0.49174	0.810646	-0.822484	-1.0736	-1.01666	0.944785	-0.997975	-1.1511	-1.68732	0.990883	-0.435532	0.507809	-0.515842	0.83947	-0.81686	-1.07079	-1.02171	0.965984	-1.03993
2	22	uniform cytoplasm	0.913715	0.728329	-0.419365	0.628791	0.285238	0.705431	-0.286673	-0.726162	-0.725743	0.747987	-0.76817	-1.00142	-0.545398	0.732993	-0.356087	0.627708	0.190075	0.665389	-0.328655	-0.731643	-0.718897	0.736801	-0.738389	-1.00984	-0.6108	0.728168	-0.337388	0.707603	0.146198	0.650179	-0.341047	-0.72461	-0.706748	0.724164	-0.723687	-1.00653	-0.645977	0.727325	-0.319192	0.694582	0.106478	0.649006	-0.351928	-0.722421	-0.703765	0.722027	-0.722491
2	23	vesicles	0.673636	0.848621	-0.445055	0.603018	-0.429348	0.769137	-0.679352	-0.874892	-0.854871	0.845115	-0.859457	-1.04804	-0.745619	0.836764	-0.397546	0.596141	-0.481419	0.715823	-0.676291	-0.860931	-0.83104	0.808453	-0.816595	-1.01539	-0.804048	0.829987	-0.428406	0.645033	-0.490013	0.707356	-0.668509	-0.85305	-0.822167	0.798213	-0.813383	-1.00124	-0.843247	0.828318	-0.487866	0.672655	-0.48988	0.715172	-0.661339	-0.84922	-0.820849	0.802136	-0.824978
2	24	mitochondria	0.517079	0.549365	-0.197597	0.601525	2.96668	0.608955	0.62777	-0.526572	-0.547004	0.664944	-0.623798	-0.912489	0.12788	0.560192	0.0583408	0.520158	2.35653	0.47904	0.412182	-0.521833	-0.51043	0.576138	-0.473583	-0.54244	-0.0468751	0.543545	0.442824	0.45972	2.10968	0.428157	0.339301	-0.489898	-0.46691	0.532364	-0.404111	-0.340599	-0.102802	0.540379	0.927599	0.364989	1.94229	0.409083	0.291065	-0.480547	-0.456888	0.521084	-0.375149
2	25	cytoskeleton	0.452695	0.93667	-0.474954	0.508188	-0.981862	0.813158	-0.999617	-1.00467	-0.964031	0.91012	-0.930652	-1.02895	-1.08345	0.917299	-0.439672	0.401801	-0.977986	0.775844	-0.9512	-0.981915	-0.93785	0.88832	-0.917135	-1.10986	-1.10821	0.908885	-0.506518	0.258448	-0.973055	0.786277	-0.930783	-0.972654	-0.933004	0.894283	-0.942517	-1.22181	-1.11706	0.909444	-0.599368	-0.0173099	-0.939393	0.808574	-0.903391	-0.969396	-0.934549	0.909524	-0.972673
2	26	nucleoplasm	0.820758	0.770564	-0.352757	0.422644	-0.419031	0.619149	-0.604452	-0.770121	-0.730139	0.699542	-0.652985	-0.390433	-0.616678	0.760209	-0.351664	0.493054	-0.428445	0.618424	-0.590498	-0.758693	-0.725704	0.697656	-0.671123	-0.585155	-0.573215	0.753923	-0.385815	0.563274	-0.412058	0.627652	-0.575802	-0.751576	-0.723804	0.705226	-0.690091	-0.661093	-0.583255	0.751596	-0.437715	0.576777	-0.415865	0.639766	-0.572358	-0.748092	-0.723751	0.714425	-0.706339
2	27	nucleoli	0.212328	0.525118	-0.432671	0.429118	-0.469495	0.589982	-0.60999	-0.588936	-0.604317	0.580044	-0.628895	-0.582687	-0.305229	0.548657	-0.394249	0.43294	-0.529724	0.566019	-0.624845	-0.61921	-0.619808	0.573133	-0.616422	-0.540802	-0.397551	0.561782	-0.43525	0.497041	-0.535297	0.568422	-0.621418	-0.631043	-0.627685	0.573322	-0.618457	-0.504155	-0.450251	0.582646	-0.498045	0.49666	-0.537419	0.585397	-0.617705	-0.643571	-0.640159	0.590962	-0.632667
2	28	structured cytoplasm	0.743731	0.660543	-0.342971	0.406024	-0.180096	0.539346	-0.458004	-0.662969	-0.637701	0.598006	-0.574377	-0.358376	-0.660646	0.628194	-0.337091	0.498442	-0.175825	0.528965	-0.455266	-0.64714	-0.627345	0.573582	-0.577385	-0.538917	-0.63264	0.617478	-0.363891	0.612853	-0.179394	0.533663	-0.452262	-0.643121	-0.625676	0.572806	-0.591313	-0.620054	-0.634886	0.627286	-0.420874	0.71473	-0.191982	0.557006	-0.456908	-0.654731	-0.638547	0.590663	-0.618681
2	29	nucleoplasm and cytoplasm	0.497113	-1.6873	3.06586	-1.52575	0.98707	-2.25257	1.7159	1.75168	1.97157	-1.93532	2.1106	1.3382	0.419401	-1.69622	2.63718	-1.13499	1.42341	-2.20017	2.04529	1.7925	1.97533	-1.92476	2.06535	1.29736	0.54646	-1.70905	2.54932	-0.70475	1.74449	-2.13961	2.21674	1.8282	1.97185	-1.90301	2.00564	1.15714	0.684978	-1.70546	2.12127	-0.168987	1.81794	-2.05974	2.25521	1.82765	1.93235	-1.86076	1.90027
2	30	mitochondria	0.420921	-0.242632	-0.384085	-0.2467	-0.950527	0.0393301	-0.823353	-0.143025	-0.138026	-0.149594	-0.114609	0.320181	-0.839261	-0.114277	-0.384376	-0.209144	-0.966253	0.197941	-0.828711	-0.274417	-0.281718	0.0281606	-0.269833	0.312666	-0.845345	-0.116492	-0.445379	-0.14313	-0.940886	0.231177	-0.786763	-0.255887	-0.280586	0.0665927	-0.30902	0.22992	-0.731155	-0.066263	-0.556287	-0.0964578	-0.933481	0.339592	-0.781338	-0.29098	-0.336122	0.182919	-0.423427
2	31	cytoskeleton	0.346039	0.0691243	-0.373683	0.556836	0.145998	0.434708	0.143729	0.000495482	-0.122393	0.338768	-0.373956	-0.773705	0.772568	0.117784	-0.288125	0.478206	-0.00331371	0.330007	0.0210596	-0.0388414	-0.112282	0.282235	-0.25875	-0.517888	0.614078	0.123408	-0.223775	0.405748	-0.0502984	0.235856	-0.0158779	-0.0425609	-0.0869356	0.201111	-0.148645	-0.290784	0.490212	0.113851	-0.14874	0.299422	-0.070375	0.158014	-0.0338426	-0.032817	-0.0610033	0.134968	-0.0581503
2	32	focal	0.923357	0.790445	-0.380861	0.511099	-0.143682	0.659923	-0.516084	-0.785101	-0.754109	0.73217	-0.696193	-0.556949	-0.518973	0.781767	-0.346725	0.547452	-0.129062	0.654531	-0.503257	-0.775515	-0.748915	0.733289	-0.712479	-0.779137	-0.488714	0.775408	-0.360221	0.638704	-0.132158	0.661879	-0.497804	-0.768369	-0.745214	0.739602	-0.729005	-0.89216	-0.498654	0.775043	-0.436209	0.742454	-0.163427	0.673877	-0.503731	-0.767503	-0.74727	0.748799	-0.746404
2	33	nucleoli	0.225699	0.387852	-0.43452	0.597678	-0.313768	0.618102	-0.318046	-0.354647	-0.431382	0.594413	-0.621625	-1.02999	0.421786	0.426029	-0.379342	0.564948	-0.395064	0.539126	-0.368802	-0.391289	-0.430842	0.545519	-0.540479	-0.874238	0.276039	0.432259	-0.373306	0.523896	-0.412421	0.482765	-0.37832	-0.396353	-0.417566	0.49415	-0.471169	-0.722013	0.161851	0.431003	-0.390375	0.432798	-0.437615	0.444572	-0.391184	-0.394921	-0.406112	0.459662	-0.425136
2	34	uniform cytoplasm	0.364393	0.206639	-0.348055	0.630749	1.66259	0.49973	0.715768	-0.0843872	-0.194703	0.417686	-0.449519	-0.962267	0.870772	0.268163	-0.251098	0.634019	1.38566	0.42507	0.53272	-0.150698	-0.222734	0.392193	-0.359784	-0.87192	0.713659	0.27575	-0.146654	0.701974	1.26335	0.343092	0.466409	-0.154771	-0.197876	0.324042	-0.254395	-0.719961	0.598283	0.271036	-0.0296673	0.730151	1.19216	0.27615	0.428829	-0.147838	-0.175103	0.271435	-0.170751
2	35	uniform cytoplasm	0.588116	0.83661	-0.416133	0.587106	-0.162315	0.717627	-0.557479	-0.845478	-0.816371	0.791247	-0.7788	-0.790289	-0.634838	0.826262	-0.36469	0.592319	-0.17959	0.693922	-0.552656	-0.834492	-0.805044	0.7819	-0.774516	-0.930504	-0.645312	0.818172	-0.381851	0.688395	-0.177604	0.69062	-0.544548	-0.82436	-0.795401	0.779113	-0.777442	-0.951895	-0.67002	0.817852	-0.41688	0.72653	-0.189237	0.700159	-0.543367	-0.822601	-0.796233	0.787177	-0.790981
2	36	ER	0.321969	0.892757	-0.435397	0.633058	0.158849	0.799914	-0.538217	-0.918457	-0.894516	0.888505	-0.90349	-1.19387	-0.676981	0.879209	-0.374012	0.61853	-0.0206187	0.732059	-0.571918	-0.904993	-0.867687	0.83719	-0.838151	-1.05977	-0.780299	0.870556	-0.389393	0.710089	-0.0781806	0.723539	-0.575828	-0.893753	-0.855779	0.828415	-0.833579	-1.01701	-0.818929	0.87107	-0.422143	0.745014	-0.120261	0.737642	-0.580558	-0.892689	-0.858496	0.839657	-0.853463
2	37	nucleoli	0.485036	1.03835	-0.45118	0.589313	-0.551293	0.85671	-0.903228	-1.12949	-1.06817	0.985522	-1.0171	-1.12789	-1.7292	1.00559	-0.382913	0.435993	-0.631721	0.792344	-0.88239	-1.08779	-1.02271	0.932329	-0.960681	-0.843221	-1.77572	0.992028	-0.396158	0.291883	-0.656925	0.797739	-0.869423	-1.07014	-1.01075	0.933115	-0.978407	-0.771429	-1.76623	0.990843	-0.404992	-0.0267181	-0.673941	0.823547	-0.86183	-1.06583	-1.01417	0.951959	-1.01566
2	38	mitochondria	0.39357	0.776502	-0.437736	0.581798	-0.466581	0.722093	-0.63837	-0.775783	-0.769079	0.779359	-0.775976	-0.894807	-0.375237	0.76383	-0.373973	0.507283	-0.532943	0.642959	-0.6482	-0.760695	-0.735556	0.722046	-0.698575	-0.653736	-0.484576	0.755788	-0.369134	0.440818	-0.527907	0.618837	-0.636197	-0.751044	-0.720588	0.703662	-0.675094	-0.476798	-0.564295	0.749652	-0.370767	0.293595	-0.533272	0.616729	-0.633258	-0.743403	-0.713857	0.70105	-0.671273
2	39	Golgi	0.80536	0.234209	-0.390269	0.575625	0.0572125	0.452746	-0.0443651	-0.179051	-0.254091	0.376802	-0.401296	-0.748147	0.576917	0.288269	-0.35399	0.612363	-0.00804441	0.486952	-0.106505	-0.230897	-0.301885	0.457884	-0.459618	-0.919468	0.527269	0.302904	-0.388212	0.744628	-0.0524582	0.469689	-0.136514	-0.246053	-0.305867	0.447848	-0.443284	-0.983631	0.461996	0.303564	-0.428514	0.801352	-0.0631542	0.436128	-0.143965	-0.244651	-0.295159	0.412357	-0.400684
2	40	nucleoli	0.28317	1.03817	-0.472545	0.513722	-0.958701	0.849861	-1.04523	-1.13138	-1.06907	0.970833	-1.00134	-0.706364	-1.82354	1.00952	-0.425499	0.305281	-0.967338	0.793889	-0.998727	-1.09482	-1.02805	0.929186	-0.961581	-0.630232	-1.83389	0.995103	-0.466655	-0.0957238	-0.961659	0.800314	-0.975887	-1.07838	-1.01777	0.931697	-0.981984	-0.494449	-1.84263	0.992136	-0.528627	-0.681234	-0.958565	0.826375	-0.962149	-1.0731	-1.02037	0.950247	-1.01916
2	41	Golgi	0.263129	0.111128	-0.310739	0.213356	-0.265415	0.220191	-0.18181	-0.0743502	-0.116955	0.147026	-0.144424	0.00174206	0.311896	0.134748	-0.302461	0.284515	-0.271223	0.275786	-0.206144	-0.106273	-0.155326	0.198667	-0.207374	-0.149115	0.321031	0.155082	-0.330402	0.418024	-0.280586	0.285425	-0.218467	-0.128005	-0.173964	0.213375	-0.21965	-0.24033	0.304423	0.168506	-0.385306	0.532174	-0.28171	0.272153	-0.224297	-0.141067	-0.179924	0.204556	-0.207673
2	42	nucleoplasm and cytoplasm	0.474108	0.818236	-0.408756	0.595017	-0.00109576	0.694846	-0.47314	-0.828024	-0.795557	0.767995	-0.753136	-0.73805	-0.667079	0.812309	-0.366416	0.631441	-0.0159021	0.682679	-0.473293	-0.822546	-0.792749	0.767242	-0.761399	-0.946703	-0.668393	0.804907	-0.372274	0.732146	-0.0152317	0.684465	-0.467593	-0.812742	-0.785515	0.768938	-0.769845	-1.03303	-0.680534	0.804881	-0.390158	0.762298	-0.0287215	0.695632	-0.468235	-0.81096	-0.786828	0.778749	-0.784437
2	43	mitochondria	0.489523	0.16189	-0.274561	-0.0298924	-0.643269	0.0962944	-0.575292	-0.296384	-0.251643	0.120886	-0.199519	0.0228038	-0.600217	0.17634	-0.299731	0.0911062	-0.651975	0.173402	-0.554784	-0.319163	-0.293119	0.169046	-0.265934	-0.0509554	-0.572009	0.190946	-0.366448	0.244504	-0.641475	0.246407	-0.543634	-0.332256	-0.323522	0.224985	-0.336135	-0.155853	-0.53774	0.200643	-0.452026	0.340772	-0.648262	0.315256	-0.539384	-0.339914	-0.346957	0.279853	-0.402931
2	44	nucleoplasm and cytoplasm	0.4086	0.573817	-0.376021	0.627563	0.764519	0.588358	0.0424388	-0.532649	-0.548674	0.597596	-0.610283	-0.89249	-0.166196	0.594028	-0.314266	0.653764	0.676471	0.577769	-0.0238786	-0.553719	-0.565752	0.616039	-0.610772	-1.02451	-0.214115	0.591342	-0.281196	0.756601	0.619201	0.554764	-0.0494206	-0.547665	-0.551232	0.600212	-0.585244	-1.04245	-0.256229	0.589974	-0.241673	0.810221	0.57988	0.538154	-0.066784	-0.544812	-0.543882	0.587692	-0.564165
2	45	nucleoli and cytoplasm	0.358316	0.252821	-0.369288	0.604507	0.661587	0.442749	0.312164	-0.170481	-0.239971	0.369242	-0.38935	-0.75441	0.604454	0.310427	-0.306643	0.622351	0.549086	0.44966	0.20586	-0.230446	-0.286233	0.421125	-0.407633	-0.854702	0.517698	0.321727	-0.265794	0.703829	0.499442	0.405282	0.169379	-0.240628	-0.277767	0.3916	-0.353288	-0.811052	0.429749	0.320202	-0.213927	0.723285	0.468727	0.360738	0.147545	-0.237312	-0.262461	0.355788	-0.296363
2	47	structured cytoplasm	0.131138	-0.139608	-0.00369968	-0.239533	0.10952	-0.215705	0.10101	0.170932	0.195536	-0.21531	0.265969	0.464574	0.384924	-0.14873	0.0753036	-0.0305322	0.282858	-0.221622	0.250949	0.219933	0.232079	-0.218437	0.275989	0.307106	0.482513	-0.142718	0.0169711	0.15842	0.275281	-0.170228	0.238074	0.210594	0.207705	-0.184467	0.224943	0.153845	0.520617	-0.139637	-0.040173	0.358599	0.253882	-0.148929	0.230577	0.206988	0.198129	-0.169175	0.202986
2	48	ER	0.230158	0.574332	-0.391009	0.573995	0.0551589	0.568313	-0.241594	-0.530116	-0.54113	0.578192	-0.56252	-0.685621	-0.00108878	0.589163	-0.342194	0.581568	-0.0166367	0.550858	-0.284193	-0.546037	-0.550527	0.583742	-0.559051	-0.745499	-0.0516822	0.588426	-0.326472	0.629431	-0.0236436	0.520572	-0.287825	-0.543895	-0.539489	0.562986	-0.526868	-0.677717	-0.122469	0.58452	-0.303475	0.626519	-0.02178	0.498005	-0.287702	-0.53752	-0.528645	0.547718	-0.500103
3	1	nucleoplasm	0.248615	0.819055	-0.434818	0.522997	-0.609093	0.693841	-0.802368	-0.89077	-0.850678	0.767392	-0.795521	-0.742832	-1.06701	0.797557	-0.391298	0.505455	-0.621624	0.659284	-0.778768	-0.87271	-0.829944	0.740928	-0.775686	-0.760645	-1.09235	0.79088	-0.433398	0.558001	-0.6289	0.671424	-0.768382	-0.867077	-0.828466	0.749562	-0.797774	-0.761985	-1.10536	0.79306	-0.494671	0.524282	-0.635444	0.701139	-0.763221	-0.867966	-0.835833	0.77381	-0.833697
3	2	structured cytoplasm	0.438444	0.762215	-0.430245	0.642375	0.344075	0.740813	-0.306699	-0.758398	-0.760147	0.794483	-0.816622	-1.10128	-0.484912	0.762922	-0.366066	0.647521	0.171366	0.684733	-0.366186	-0.761365	-0.747881	0.764402	-0.766369	-1.04836	-0.574899	0.756706	-0.362536	0.717886	0.102347	0.66585	-0.383877	-0.752801	-0.733045	0.745677	-0.747623	-0.99685	-0.625312	0.756787	-0.367742	0.703065	0.0693008	0.66665	-0.392367	-0.751492	-0.731378	0.74529	-0.749208
3	3	nucleoli and cytoplasm	0.717251	0.679044	-0.418972	0.624567	0.223529	0.690274	-0.257352	-0.673915	-0.683487	0.723436	-0.751339	-1.02766	-0.467653	0.687875	-0.345647	0.608847	0.11055	0.639002	-0.306637	-0.681532	-0.674124	0.701543	-0.704565	-0.963073	-0.554407	0.685653	-0.317962	0.62564	0.0587527	0.614513	-0.324195	-0.677901	-0.662498	0.679945	-0.678595	-0.912272	-0.604291	0.682754	-0.301406	0.613637	0.0333475	0.602673	-0.331136	-0.672732	-0.65462	0.668266	-0.665307
3	4	cytoskeleton	0.547445	0.143629	-0.304652	0.434708	-0.0473583	0.267896	-0.0223634	-0.0804572	-0.122544	0.197517	-0.177459	-0.325021	0.627015	0.201278	-0.301958	0.503713	-0.0380318	0.354971	-0.0496306	-0.135226	-0.189781	0.301542	-0.284482	-0.588195	0.623908	0.213809	-0.324611	0.605544	-0.0231569	0.361336	-0.0569614	-0.146309	-0.200011	0.316983	-0.293137	-0.721878	0.590663	0.21696	-0.360444	0.663126	-0.0492463	0.343712	-0.076092	-0.150509	-0.198973	0.302643	-0.271269
3	5	cytoskeleton	0.362481	0.332036	-0.144347	0.107878	-0.281119	0.286266	-0.347148	-0.305686	-0.312778	0.321291	-0.275545	-0.14706	-0.065979	0.253363	-0.147345	0.168885	-0.242817	0.207946	-0.328879	-0.256745	-0.254603	0.233564	-0.205904	-0.176431	-0.0534749	0.225997	-0.194731	0.293106	-0.253547	0.196366	-0.334796	-0.24638	-0.244022	0.206421	-0.197785	-0.198726	-0.0530184	0.218607	-0.25918	0.404516	-0.263366	0.208765	-0.339772	-0.248875	-0.247732	0.202353	-0.20779
3	6	nucleoplasm	0.133478	0.923781	-0.453421	0.619877	-0.476388	0.798246	-0.751301	-0.96044	-0.925941	0.890199	-0.902956	-1.03701	-0.904938	0.902863	-0.397877	0.594089	-0.516989	0.74076	-0.737739	-0.936715	-0.894382	0.849836	-0.855017	-0.931548	-0.969827	0.892031	-0.414496	0.595808	-0.526227	0.734359	-0.727322	-0.923693	-0.881655	0.84316	-0.854271	-0.820225	-1.01414	0.888828	-0.442012	0.503531	-0.536672	0.746701	-0.722066	-0.918036	-0.879918	0.851346	-0.870361
3	7	structured cytoplasm	0.448652	0.525959	-0.168735	0.21565	-0.153395	0.372672	-0.356004	-0.468591	-0.44696	0.437336	-0.341081	0.0821209	-0.208021	0.460413	-0.187568	0.321693	-0.101063	0.342707	-0.333737	-0.416366	-0.402374	0.377438	-0.311456	-0.0701219	-0.120101	0.442739	-0.221068	0.458769	-0.0803293	0.351604	-0.327718	-0.408702	-0.400355	0.374563	-0.325602	-0.185595	-0.102903	0.43903	-0.309959	0.619891	-0.101552	0.367205	-0.337753	-0.41213	-0.405994	0.382017	-0.346259
3	8	ER	0.188351	0.857265	-0.436247	0.617935	-0.310116	0.751698	-0.635828	-0.88031	-0.853739	0.829249	-0.839904	-1.04137	-0.805386	0.842832	-0.382731	0.617207	-0.356419	0.694476	-0.631875	-0.863164	-0.828343	0.788204	-0.789301	-0.972176	-0.865292	0.834092	-0.396182	0.663904	-0.378738	0.680515	-0.628742	-0.852636	-0.816023	0.777291	-0.780655	-0.886053	-0.911679	0.831229	-0.419374	0.639298	-0.389728	0.684915	-0.62569	-0.847607	-0.813052	0.782318	-0.790119
3	9	plasma membrane	0.383205	0.780355	-0.423832	0.652495	0.62583	0.752134	-0.252331	-0.782625	-0.780434	0.813507	-0.836124	-1.18194	-0.534714	0.779382	-0.353266	0.658373	0.385197	0.693683	-0.328308	-0.78358	-0.766504	0.779555	-0.781626	-1.12363	-0.627047	0.772169	-0.343419	0.754995	0.303229	0.674545	-0.348182	-0.772979	-0.750469	0.760101	-0.761508	-1.09061	-0.664877	0.772826	-0.327173	0.755412	0.24819	0.677184	-0.361631	-0.772098	-0.750063	0.761497	-0.764829
3	10	nucleoplasm	0.320513	1.05875	-0.47256	0.617474	-0.806382	0.867883	-0.988674	-1.15334	-1.08928	0.99441	-1.03566	-1.21479	-1.84238	1.02515	-0.428904	0.56002	-0.840975	0.810318	-0.952563	-1.11351	-1.04663	0.946811	-0.989475	-1.06197	-1.87429	1.01281	-0.485096	0.550445	-0.846486	0.819177	-0.934044	-1.09922	-1.03802	0.951217	-1.01408	-1.05893	-1.8672	1.01204	-0.578494	0.470866	-0.850609	0.848019	-0.92288	-1.09624	-1.04277	0.972779	-1.05765
3	11	ER	0.294866	0.767849	-0.372855	0.453014	-0.381698	0.628655	-0.594511	-0.767652	-0.731965	0.703276	-0.660384	-0.402323	-0.579922	0.758864	-0.359724	0.530828	-0.376526	0.626865	-0.578364	-0.757831	-0.727293	0.703408	-0.678364	-0.612669	-0.543353	0.75235	-0.387977	0.618197	-0.374398	0.636907	-0.569546	-0.750733	-0.724369	0.71273	-0.698466	-0.721606	-0.547195	0.751152	-0.425698	0.623764	-0.373787	0.648508	-0.564566	-0.748443	-0.725037	0.722404	-0.714416
3	12	nucleoplasm and cytoplasm	0.324105	0.771124	-0.419519	0.621979	0.157424	0.699691	-0.367737	-0.778875	-0.762818	0.755581	-0.770265	-0.914449	-0.687279	0.770278	-0.365005	0.647969	0.125043	0.675098	-0.382021	-0.776851	-0.758666	0.751065	-0.760895	-1.06685	-0.708881	0.764188	-0.372144	0.760807	0.0881774	0.665017	-0.390483	-0.768286	-0.748165	0.741923	-0.755108	-1.13025	-0.72721	0.763997	-0.391919	0.798683	0.0552934	0.667531	-0.3991	-0.766903	-0.747237	0.744272	-0.76165
3	13	ERGIC	0.714509	0.399575	-0.357259	0.574534	0.409112	0.494823	0.0258584	-0.349308	-0.387466	0.469653	-0.471163	-0.669333	0.169091	0.435952	-0.303092	0.584266	0.34743	0.509906	-0.0376269	-0.384988	-0.418381	0.517133	-0.501551	-0.812712	0.124982	0.440698	-0.264558	0.645792	0.32862	0.485352	-0.0550323	-0.387212	-0.41032	0.499813	-0.473003	-0.809443	0.0684595	0.439687	-0.250411	0.702308	0.30225	0.458127	-0.0695325	-0.384274	-0.400301	0.476875	-0.439955
3	14	ER	0.271626	0.790039	-0.442394	0.592153	-0.313452	0.738825	-0.579916	-0.797251	-0.788612	0.796989	-0.807869	-1.01086	-0.506098	0.785213	-0.387669	0.542811	-0.3613	0.68942	-0.58493	-0.791933	-0.771351	0.769121	-0.769569	-0.972227	-0.574152	0.780306	-0.410945	0.626283	-0.390753	0.675949	-0.586933	-0.786758	-0.762506	0.756636	-0.759133	-0.944766	-0.630149	0.779897	-0.452447	0.592495	-0.400568	0.680036	-0.584949	-0.78484	-0.76089	0.75894	-0.764851
3	15	ER	0.318508	0.723652	-0.369612	0.629117	1.10872	0.704568	-0.0568651	-0.703891	-0.706725	0.756929	-0.759564	-1.05538	-0.294962	0.72617	-0.242763	0.587669	0.787552	0.6185	-0.16484	-0.707098	-0.685846	0.70073	-0.667179	-0.841688	-0.434109	0.717461	-0.142771	0.613084	0.664773	0.58866	-0.19787	-0.694157	-0.664838	0.676902	-0.632612	-0.717171	-0.496915	0.716992	-0.0286827	0.608955	0.583847	0.583627	-0.21949	-0.69204	-0.662354	0.67589	-0.625609
3	16	structured cytoplasm	0.50423	0.106503	0.0590997	0.0600781	0.11958	-0.0487239	0.0406111	-0.0546562	-0.0216881	0.0025337	0.0728306	0.322806	-0.209781	0.0513624	-0.0102262	0.209693	0.250252	-0.0368973	0.0860602	-0.0130933	9.77955e-05	-0.0405018	0.0792356	0.238733	-0.143551	0.0455614	-0.077643	0.378815	0.247655	0.00650205	0.0710935	-0.0193839	-0.0195415	-0.021013	0.0342998	0.119002	-0.102995	0.0465881	-0.132584	0.508025	0.250822	0.0362938	0.063652	-0.0280049	-0.0329682	-0.003388	0.000836593
3	17	nucleoli	0.268951	0.665961	-0.422818	0.165409	-0.495139	0.652585	-0.826739	-0.871335	-0.836583	0.677231	-0.786612	-0.463734	-1.34161	0.705056	-0.341001	-0.0528991	-0.585214	0.64241	-0.818233	-0.874555	-0.83379	0.704065	-0.770828	-0.319398	-1.34293	0.711531	-0.303467	-0.340533	-0.612851	0.672487	-0.807049	-0.865468	-0.831075	0.744447	-0.80118	-0.269839	-1.29062	0.733604	-0.276371	-0.675434	-0.635084	0.714544	-0.80382	-0.873057	-0.845601	0.790904	-0.848049
3	18	nucleoli	0.443594	-0.322316	-0.372928	-0.485803	-0.9065	-0.00834632	-0.800684	-0.0696965	-0.0810353	-0.234903	-0.0243834	0.887287	-0.799981	-0.19181	-0.368904	-0.442133	-0.922894	0.132044	-0.799819	-0.204732	-0.222928	-0.0660319	-0.172546	0.893225	-0.811931	-0.0824392	-0.439913	-0.42234	-0.922375	0.253349	-0.801655	-0.286202	-0.314503	0.0803088	-0.299827	0.840493	-0.774809	0.000217456	-0.543436	-0.362287	-0.917237	0.361193	-0.798337	-0.340576	-0.379097	0.212539	-0.411708
3	19	nucleoli	0.289233	0.623378	-0.456637	0.152447	-0.98344	0.630232	-1.03846	-0.866385	-0.830907	0.613462	-0.744676	0.105242	-1.93256	0.721633	-0.420879	-0.00449342	-0.995393	0.668	-1.0025	-0.9178	-0.875929	0.703883	-0.800829	0.0885782	-1.8961	0.772139	-0.476909	-0.357064	-0.990897	0.722611	-0.984515	-0.943752	-0.906579	0.776708	-0.875046	0.0458667	-1.8421	0.799483	-0.561952	-0.884763	-0.989729	0.775715	-0.9725	-0.959902	-0.929754	0.836211	-0.947194
3	20	ER	0.362556	0.252377	-0.276547	0.228685	-0.298733	0.239015	-0.334102	-0.291388	-0.284978	0.253409	-0.299142	-0.394242	-0.273523	0.250386	-0.280752	0.276557	-0.305348	0.258577	-0.335763	-0.299743	-0.299025	0.268587	-0.325893	-0.477567	-0.273555	0.257696	-0.334341	0.404901	-0.322931	0.287162	-0.343934	-0.308867	-0.313158	0.2874	-0.354441	-0.536674	-0.277346	0.265831	-0.413473	0.515327	-0.324878	0.320484	-0.347546	-0.317685	-0.327694	0.308556	-0.384896
3	21	nucleoplasm	0.468787	0.713534	-0.279777	0.634184	3.09591	0.759438	0.433419	-0.785283	-0.782765	0.865181	-0.852903	-1.2783	-0.345763	0.715428	-0.0679288	0.591986	2.47537	0.66708	0.248414	-0.766428	-0.747992	0.795125	-0.747316	-1.03388	-0.466672	0.703697	0.272788	0.564997	2.22912	0.645036	0.187394	-0.737971	-0.718632	0.770279	-0.713464	-0.924865	-0.496657	0.701661	0.805328	0.438565	2.0635	0.644444	0.146933	-0.725461	-0.710677	0.767288	-0.704962
3	22	uniform cytoplasm	0.928547	0.78204	-0.422769	0.630668	0.146315	0.704061	-0.392811	-0.778357	-0.762653	0.760562	-0.757945	-0.885545	-0.456577	0.780547	-0.367811	0.652059	0.074901	0.68052	-0.417613	-0.778944	-0.758936	0.758003	-0.752685	-1.01037	-0.49714	0.774829	-0.36791	0.74423	0.052777	0.672385	-0.420011	-0.771578	-0.749414	0.750968	-0.747826	-1.03224	-0.533832	0.774078	-0.38528	0.763814	0.028425	0.675597	-0.424967	-0.76936	-0.747954	0.752153	-0.750655
3	23	vesicles	0.42508	0.606838	-0.385298	0.355295	-0.54292	0.545867	-0.639452	-0.62519	-0.615588	0.584218	-0.581652	-0.458347	-0.419782	0.582818	-0.357029	0.36817	-0.575757	0.51157	-0.637784	-0.615464	-0.598209	0.546594	-0.552843	-0.436307	-0.456752	0.579489	-0.392072	0.412599	-0.579428	0.518215	-0.633066	-0.61635	-0.599737	0.546901	-0.562447	-0.430879	-0.479634	0.58699	-0.462174	0.466925	-0.580933	0.548213	-0.63176	-0.624948	-0.612219	0.56966	-0.594981
3	24	mitochondria	0.47332	0.909935	-0.426768	0.590748	-0.265811	0.781191	-0.679985	-0.941005	-0.906765	0.87532	-0.879346	-0.95177	-0.916713	0.885797	-0.346064	0.489508	-0.386287	0.699334	-0.69256	-0.912289	-0.865139	0.813831	-0.798128	-0.636305	-1.01977	0.873575	-0.324661	0.421025	-0.426222	0.689855	-0.691622	-0.897355	-0.849915	0.80531	-0.793757	-0.468744	-1.06776	0.867282	-0.297429	0.269395	-0.452426	0.700326	-0.691031	-0.888503	-0.845855	0.81271	-0.807715
3	25	cytoskeleton	0.324312	0.606181	-0.393168	0.604285	0.481646	0.669673	-0.141736	-0.571826	-0.599494	0.693637	-0.694734	-0.976672	0.0296425	0.620029	-0.294844	0.533563	0.252524	0.608692	-0.236851	-0.588394	-0.591688	0.66983	-0.637287	-0.833257	-0.100559	0.617441	-0.231795	0.488135	0.167625	0.581922	-0.266006	-0.583934	-0.577656	0.646	-0.604302	-0.7357	-0.178705	0.614012	-0.17306	0.420117	0.115064	0.570721	-0.283581	-0.578729	-0.570454	0.632632	-0.585358
3	26	nucleoplasm	0.867589	0.772038	-0.410947	0.479042	-0.517323	0.663396	-0.692959	-0.783769	-0.758908	0.726981	-0.70533	-0.421082	-0.65421	0.767513	-0.385789	0.53353	-0.528247	0.655366	-0.676845	-0.780678	-0.755427	0.726468	-0.718045	-0.582207	-0.646	0.769903	-0.422355	0.613772	-0.520605	0.664514	-0.664806	-0.782021	-0.75773	0.737644	-0.739206	-0.678954	-0.664819	0.777038	-0.483443	0.608653	-0.534766	0.681989	-0.663301	-0.787023	-0.764605	0.755679	-0.765299
3	27	nucleoli	0.2747	0.834762	-0.459652	0.549046	-0.743314	0.758007	-0.872591	-0.919792	-0.888326	0.822098	-0.863602	-0.902236	-1.09875	0.831053	-0.416212	0.513473	-0.761355	0.7186	-0.844354	-0.909685	-0.8722	0.800863	-0.835756	-0.824664	-1.13921	0.833673	-0.457832	0.490175	-0.758996	0.723008	-0.828409	-0.907139	-0.871342	0.807721	-0.848925	-0.778755	-1.16614	0.840449	-0.52205	0.400985	-0.750305	0.744507	-0.815891	-0.90859	-0.876967	0.830453	-0.879171
3	28	structured cytoplasm	0.62999	0.381596	-0.206825	-0.0199727	-0.0981186	0.267666	-0.329238	-0.380444	-0.365594	0.302073	-0.257906	0.0812973	-0.367462	0.296809	-0.223125	-0.00265759	-0.124275	0.225829	-0.34197	-0.344269	-0.330713	0.229188	-0.233205	-0.0325633	-0.337965	0.284252	-0.266488	0.154153	-0.143429	0.23829	-0.351906	-0.348235	-0.337001	0.232593	-0.256676	-0.0895645	-0.31791	0.279658	-0.32336	0.326628	-0.142404	0.26259	-0.355007	-0.353001	-0.34461	0.243765	-0.281013
3	29	nucleoplasm and cytoplasm	0.329842	-0.468992	1.36116	-2.26809	-0.304201	-0.835767	-0.0990323	0.434959	0.491879	-0.683063	0.840618	1.46212	-0.773716	-0.85896	1.44352	-2.68064	-0.292783	-1.26376	0.0375927	0.725371	0.824631	-1.10739	1.20869	1.6029	-0.603812	-1.01793	1.5046	-2.56032	-0.274598	-1.41681	0.123276	0.844893	0.96315	-1.25966	1.31888	1.65766	-0.381814	-1.0467	1.15238	-1.92341	-0.343253	-1.38001	0.0920039	0.835546	0.945427	-1.25417	1.24212
3	30	mitochondria	0.58789	0.93127	-0.461585	0.551167	-0.772825	0.804509	-0.880448	-0.987702	-0.948802	0.900797	-0.919538	-0.951431	-1.16492	0.908785	-0.414843	0.464344	-0.779513	0.744442	-0.846459	-0.959433	-0.912141	0.853844	-0.86898	-0.792087	-1.21377	0.898797	-0.453629	0.37426	-0.771904	0.74234	-0.827985	-0.947867	-0.902808	0.84975	-0.876402	-0.727459	-1.23795	0.897511	-0.516933	0.246224	-0.760977	0.759146	-0.813774	-0.944199	-0.903969	0.862167	-0.901035
3	31	cytoskeleton	0.527056	0.571665	-0.396038	0.462033	-0.27328	0.583825	-0.477691	-0.580405	-0.593554	0.608707	-0.620552	-0.715455	-0.232936	0.552876	-0.35478	0.46644	-0.338298	0.53827	-0.502075	-0.580479	-0.579931	0.574644	-0.587951	-0.685852	-0.304353	0.547525	-0.373417	0.528377	-0.353732	0.528057	-0.503994	-0.579842	-0.574919	0.558506	-0.577116	-0.642286	-0.349411	0.541811	-0.405047	0.548992	-0.356158	0.529767	-0.502489	-0.577099	-0.572044	0.55241	-0.574857
3	32	focal	0.505904	-0.0352381	0.00356431	-0.419528	-0.0837361	-0.14306	-0.161758	0.0302618	0.0494596	-0.13588	0.191916	0.719647	0.00356028	-0.133805	-0.055132	-0.272137	0.0848423	-0.1699	-0.106249	0.0755284	0.0842251	-0.21882	0.218508	0.635316	0.098042	-0.145135	-0.112029	-0.0633488	0.0974581	-0.120803	-0.113712	0.0651489	0.0615439	-0.196946	0.167359	0.525841	0.163448	-0.16774	-0.148176	0.202358	0.111902	-0.1133	-0.0961408	0.083223	0.0759786	-0.199366	0.157629
3	33	nucleoli	0.106796	0.645077	-0.438873	0.420388	-0.748344	0.621464	-0.784465	-0.715712	-0.702823	0.643873	-0.68135	-0.648889	-0.603954	0.651284	-0.404311	0.408808	-0.764116	0.602078	-0.768303	-0.724224	-0.70538	0.640544	-0.677202	-0.636833	-0.653408	0.655223	-0.455366	0.445071	-0.77061	0.61022	-0.761337	-0.728343	-0.710125	0.647727	-0.689672	-0.616002	-0.689318	0.665873	-0.532101	0.3945	-0.775033	0.6307	-0.757173	-0.734822	-0.719931	0.669417	-0.714024
3	34	uniform cytoplasm	0.403357	0.471737	-0.375557	0.632486	1.01484	0.552824	0.249059	-0.410598	-0.44901	0.53449	-0.555577	-0.861634	0.0691558	0.503998	-0.302506	0.656788	0.872081	0.528538	0.146182	-0.444988	-0.470332	0.546863	-0.536433	-0.936443	-0.00599165	0.504662	-0.241055	0.753237	0.818834	0.483581	0.11605	-0.442113	-0.452371	0.511838	-0.482633	-0.89109	-0.0666388	0.501739	-0.149454	0.760132	0.754616	0.44777	0.0879658	-0.437728	-0.439506	0.485643	-0.439817
3	35	uniform cytoplasm	0.389071	0.321114	-0.304073	0.304667	-0.0910526	0.263511	-0.331957	-0.353356	-0.346122	0.262736	-0.270634	-0.0650358	-0.187728	0.295963	-0.281393	0.345068	0.000386179	0.263858	-0.316454	-0.369921	-0.360424	0.24704	-0.286092	-0.168116	-0.214653	0.290253	-0.29272	0.457588	0.0247126	0.283997	-0.314553	-0.37914	-0.370738	0.259116	-0.308804	-0.200993	-0.227214	0.290477	-0.31852	0.548808	-0.00829978	0.314219	-0.327993	-0.387844	-0.382379	0.281494	-0.334367
3	36	ER	0.291589	0.0108327	-0.255939	0.615161	2.72045	0.377186	1.26388	0.123578	-0.00489991	0.266739	-0.299955	-0.843685	0.971472	0.0858381	-0.0591317	0.569442	2.19068	0.231477	0.964746	0.0494476	-0.0152444	0.18259	-0.120205	-0.548719	0.76156	0.095338	0.219239	0.569762	1.99259	0.114901	0.865395	0.0457368	0.0202349	0.100516	0.0187643	-0.296827	0.629855	0.0860418	0.618671	0.488239	1.86982	0.0238319	0.807464	0.0582868	0.0529044	0.0402274	0.128246
3	37	nucleoli	0.469358	1.01159	-0.422814	0.602598	-0.171864	0.841457	-0.771103	-1.09455	-1.03754	0.969782	-0.991268	-1.11411	-1.53958	0.980878	-0.331816	0.491428	-0.310368	0.771432	-0.770817	-1.05356	-0.991423	0.913163	-0.925917	-0.800286	-1.60098	0.965592	-0.270434	0.330616	-0.358349	0.772764	-0.764891	-1.03195	-0.975081	0.909927	-0.934651	-0.691431	-1.58964	0.964566	-0.189727	0.0651358	-0.392535	0.795879	-0.762189	-1.02716	-0.977995	0.927032	-0.966869
3	38	mitochondria	0.366477	0.642048	-0.426529	0.504497	-0.612501	0.64064	-0.644753	-0.636013	-0.644219	0.667761	-0.656402	-0.690498	-0.139211	0.642341	-0.379112	0.454179	-0.637508	0.597217	-0.639855	-0.633244	-0.62856	0.644998	-0.62598	-0.623325	-0.203172	0.635535	-0.398904	0.418652	-0.633886	0.573755	-0.630623	-0.625672	-0.616074	0.623958	-0.602212	-0.516967	-0.273698	0.631383	-0.427356	0.2901	-0.634827	0.564305	-0.625634	-0.620732	-0.61013	0.614741	-0.589524
3	39	Golgi	0.967647	0.854335	-0.443679	0.525124	-0.702672	0.740391	-0.802767	-0.884509	-0.853312	0.819683	-0.814588	-0.749887	-0.759151	0.840899	-0.413498	0.558733	-0.705657	0.71773	-0.774057	-0.869018	-0.837221	0.809508	-0.815216	-0.908824	-0.748439	0.83459	-0.464978	0.618752	-0.701916	0.722816	-0.759378	-0.86216	-0.833344	0.811972	-0.831152	-0.986365	-0.769628	0.834888	-0.552335	0.633857	-0.702881	0.738665	-0.752078	-0.861437	-0.836186	0.822413	-0.853289
3	40	nucleoli	0.383336	0.733356	-0.461542	0.42532	-0.920424	0.706594	-0.945638	-0.836531	-0.815674	0.738797	-0.785893	-0.465489	-0.994266	0.757385	-0.423306	0.334601	-0.92947	0.690048	-0.913201	-0.852851	-0.822643	0.752637	-0.793485	-0.530152	-1.02951	0.761922	-0.480395	0.196436	-0.924152	0.702563	-0.895311	-0.854264	-0.827009	0.767352	-0.817582	-0.545457	-1.04421	0.772984	-0.562659	-0.0778569	-0.916739	0.729907	-0.882766	-0.85984	-0.837056	0.792804	-0.85189
3	41	Golgi	0.468962	0.721784	-0.383638	0.468071	-0.424266	0.618567	-0.581348	-0.707386	-0.685533	0.6767	-0.634836	-0.48989	-0.322232	0.716981	-0.356536	0.507329	-0.42403	0.613527	-0.567215	-0.701747	-0.682333	0.677641	-0.649089	-0.662491	-0.300404	0.713573	-0.387257	0.58691	-0.416976	0.61265	-0.557149	-0.698172	-0.679912	0.678566	-0.655746	-0.709651	-0.335388	0.71225	-0.438022	0.598805	-0.430111	0.613882	-0.557948	-0.696155	-0.678855	0.67931	-0.658933
3	42	nucleoplasm and cytoplasm	0.344765	0.598031	-0.376327	0.585681	0.318003	0.568305	-0.151572	-0.552806	-0.555256	0.586976	-0.561103	-0.649192	-0.00437077	0.616232	-0.3368	0.635314	0.320877	0.580512	-0.174733	-0.572881	-0.577529	0.617135	-0.594506	-0.872864	-0.0171341	0.616679	-0.322694	0.735481	0.301521	0.570944	-0.18551	-0.572453	-0.57445	0.61221	-0.585513	-0.946162	-0.0588594	0.615191	-0.332927	0.788442	0.254894	0.559108	-0.20302	-0.569906	-0.56965	0.601946	-0.569706
3	43	mitochondria	0.157377	0.0713601	-0.119779	0.0573187	-0.149204	0.0297168	-0.0724	0.0115965	0.00697365	0.0130592	0.0703684	0.305847	0.41034	0.0577067	-0.0852898	-0.0431501	-0.190808	0.0196023	-0.115794	0.0175188	0.0132652	-0.0130657	0.0956531	0.399432	0.379566	0.0398337	0.0594777	-0.251484	-0.156653	-0.0471607	-0.0984234	0.036299	0.0430883	-0.0597367	0.174805	0.585046	0.316403	0.023053	0.210873	-0.429418	-0.165323	-0.0952692	-0.105919	0.0480125	0.0618886	-0.0935796	0.234389
3	44	nucleoplasm and cytoplasm	0.448303	0.752135	-0.410343	0.633396	0.437428	0.680948	-0.2676	-0.732917	-0.722237	0.730079	-0.720325	-0.864481	-0.297647	0.753789	-0.357612	0.674048	0.432941	0.664022	-0.282984	-0.736566	-0.724727	0.732937	-0.722252	-1.04559	-0.32176	0.74685	-0.354146	0.794579	0.38233	0.655372	-0.296233	-0.727264	-0.713923	0.725871	-0.715445	-1.10054	-0.353378	0.746625	-0.333537	0.829161	0.389045	0.655279	-0.295355	-0.725004	-0.712155	0.726351	-0.713316
3	45	nucleoli and cytoplasm	0.642836	0.662807	-0.398425	0.626751	0.615166	0.665464	-0.104515	-0.62918	-0.641211	0.689267	-0.693434	-0.942466	-0.112521	0.675741	-0.318752	0.632289	0.463198	0.620649	-0.17669	-0.647474	-0.64194	0.676825	-0.655591	-0.930101	-0.209037	0.672204	-0.271058	0.693467	0.414343	0.59276	-0.194733	-0.641511	-0.626255	0.654348	-0.621641	-0.854121	-0.27565	0.673027	-0.214105	0.694651	0.373115	0.584777	-0.209334	-0.641345	-0.62303	0.649945	-0.609718
3	47	structured cytoplasm	0.197285	0.0228542	-0.226831	0.477066	0.645458	0.119189	0.43791	0.0823117	0.0408919	0.0451119	-0.0197276	-0.264878	0.685969	0.0853731	-0.213848	0.535842	0.678204	0.220524	0.388681	0.0272815	-0.0292394	0.149916	-0.125255	-0.496103	0.683383	0.101812	-0.169421	0.639286	0.689007	0.219185	0.371986	0.0141055	-0.0373118	0.16325	-0.11812	-0.569639	0.637924	0.101985	-0.133995	0.721883	0.719927	0.180992	0.373088	0.0173477	-0.0233573	0.138462	-0.0726021
3	48	ER	0.349873	0.908756	-0.453116	0.561806	-0.652677	0.781975	-0.808747	-0.950271	-0.91392	0.871116	-0.88035	-0.928743	-0.941253	0.890012	-0.405775	0.514686	-0.67269	0.734869	-0.785271	-0.928375	-0.886732	0.838144	-0.847953	-0.909498	-0.975201	0.881709	-0.460851	0.592737	-0.674748	0.733445	-0.772149	-0.919237	-0.878889	0.836414	-0.857025	-0.89925	-1.0058	0.880471	-0.532111	0.538955	-0.680943	0.749659	-0.765223	-0.916387	-0.880482	0.847921	-0.879798
4	1	nucleoplasm	0.519276	0.293282	-0.0647245	-0.316161	-0.538827	0.0932595	-0.557215	-0.345042	-0.304606	0.172979	-0.139554	0.424954	-0.844281	0.13397	-0.0987561	-0.204095	-0.529305	-0.0184012	-0.522534	-0.250441	-0.207975	0.0115516	-0.0393518	0.415431	-0.790421	0.110593	-0.177206	-0.0193159	-0.517566	0.00447324	-0.514592	-0.249635	-0.214204	0.0114694	-0.077154	0.358002	-0.722422	0.11339	-0.283105	0.183241	-0.517529	0.0647489	-0.515841	-0.265935	-0.239386	0.0464871	-0.144396
4	2	structured cytoplasm	0.261059	0.469044	-0.381733	0.56799	0.0930403	0.512252	-0.142806	-0.411533	-0.438946	0.497514	-0.483679	-0.640552	0.203212	0.491339	-0.33322	0.583917	0.0337078	0.500094	-0.191613	-0.43281	-0.45115	0.513186	-0.485192	-0.695949	0.150144	0.495141	-0.319313	0.641631	0.0139435	0.471166	-0.20393	-0.436187	-0.442747	0.494381	-0.454056	-0.65243	0.0757583	0.491002	-0.290565	0.616899	0.00184325	0.450467	-0.211263	-0.430986	-0.432508	0.478874	-0.426486
4	3	nucleoli and cytoplasm	0.268571	-0.344229	-0.250477	0.506078	0.716648	0.0285126	0.739536	0.455137	0.330971	-0.148567	0.0985268	-0.407452	1.11217	-0.255129	-0.164576	0.502204	0.768841	0.0561233	0.683133	0.39126	0.284031	-0.0734807	0.0797039	-0.431737	1.02594	-0.231878	-0.0545262	0.5219	0.716956	-0.0167612	0.625487	0.371059	0.294382	-0.117073	0.168528	-0.322008	0.924877	-0.236632	0.0857998	0.495111	0.660432	-0.107097	0.579808	0.373902	0.320497	-0.185449	0.273497
4	4	cytoskeleton	0.231986	-0.459002	-0.0118982	-0.312989	-0.218041	-0.420657	0.109237	0.475067	0.469803	-0.498834	0.502368	0.606681	0.567083	-0.446856	-0.0471855	-0.241658	-0.177121	-0.3255	0.11154	0.453171	0.425949	-0.45258	0.438756	0.53061	0.601708	-0.454354	0.00349946	-0.227484	-0.129643	-0.324516	0.143625	0.463613	0.434713	-0.451512	0.452294	0.482393	0.6306	-0.456015	0.0387547	-0.131083	-0.0853515	-0.318546	0.161013	0.461825	0.433757	-0.446402	0.455215
4	5	cytoskeleton	0.228737	0.0216649	-0.267465	0.359548	-0.0984949	0.123569	0.0907927	0.0224908	-0.0043993	0.0475048	-0.0402178	-0.183979	0.538123	0.0855573	-0.205419	0.350029	-0.0667935	0.203671	0.0734364	-0.0325946	-0.0590094	0.14168	-0.115545	-0.316945	0.503651	0.100038	-0.112134	0.293495	-0.051906	0.199383	0.0702273	-0.0429764	-0.0634937	0.155314	-0.10336	-0.363849	0.459691	0.098191	0.0332575	0.217876	0.00280769	0.164605	0.0935505	-0.0357865	-0.0485818	0.131325	-0.0561911
4	6	nucleoplasm	0.261659	0.965473	-0.444463	0.574514	-0.484237	0.801129	-0.79214	-1.02433	-0.973662	0.905529	-0.916099	-0.878886	-1.25575	0.941475	-0.394236	0.544796	-0.512086	0.763278	-0.770215	-0.996714	-0.94612	0.8802	-0.897412	-0.952683	-1.26049	0.929455	-0.407222	0.525235	-0.472531	0.76588	-0.745311	-0.98105	-0.935166	0.880076	-0.909939	-0.971296	-1.25597	0.929932	-0.458795	0.535811	-0.493391	0.788037	-0.742125	-0.98024	-0.940578	0.897691	-0.942377
4	7	structured cytoplasm	0.166423	-0.667471	0.747349	-0.474545	0.666994	-0.850505	0.835834	0.796978	0.841104	-0.803563	0.935409	0.941943	0.635785	-0.721384	0.541662	-0.195125	0.963405	-0.816122	0.928497	0.852571	0.860659	-0.834231	0.922769	0.829095	0.758657	-0.746319	0.434545	0.0719737	1.00295	-0.772728	0.925444	0.86309	0.848615	-0.832988	0.88907	0.690475	0.832872	-0.755965	0.381302	0.343513	1.05704	-0.754978	0.927119	0.864011	0.842061	-0.829885	0.86815
4	8	ER	0.209192	0.0963915	-0.273627	0.102762	-0.548979	0.150299	-0.397419	-0.131774	-0.149372	0.126446	-0.15862	-0.0595909	0.0328459	0.0956815	-0.242883	0.0193495	-0.560364	0.129259	-0.400469	-0.138986	-0.146486	0.11224	-0.145083	0.00163523	0.00201758	0.0963187	-0.2654	-0.0735308	-0.575887	0.123931	-0.411894	-0.146363	-0.149933	0.103767	-0.136936	0.0893404	-0.0339981	0.0938214	-0.290603	-0.125395	-0.564769	0.124995	-0.41059	-0.148444	-0.150745	0.0984699	-0.129629
4	9	plasma membrane	1	-1.76797	3.06597	-2.18221	1.11722	-2.32495	1.70591	1.79391	1.97554	-2.01046	2.18329	1.62883	0.438654	-1.92258	3.61196	-2.13081	1.85048	-2.63248	2.35277	2.04071	2.25673	-2.19013	2.43243	1.6415	0.61948	-1.99316	3.58973	-1.79534	2.07867	-2.71827	2.54	2.13662	2.34713	-2.25067	2.47524	1.58892	0.80954	-2.01479	3.24979	-1.14157	2.08709	-2.72523	2.56988	2.16174	2.35406	-2.25379	2.42945
4	10	nucleoplasm	0.157102	0.959086	-0.465624	0.637028	-0.615686	0.823122	-0.826881	-1.01882	-0.976656	0.923865	-0.953939	-1.19144	-1.30178	0.936736	-0.414857	0.619644	-0.645362	0.762629	-0.804266	-0.992704	-0.942018	0.877849	-0.901975	-1.0934	-1.35513	0.926567	-0.445769	0.636271	-0.649139	0.761428	-0.790342	-0.980848	-0.932249	0.874216	-0.909688	-1.06942	-1.37573	0.925129	-0.498484	0.549614	-0.664717	0.781346	-0.78582	-0.977515	-0.934019	0.889443	-0.938802
4	11	ER	0.205456	-0.739433	0.473642	-0.803887	-0.250563	-0.798994	0.11907	0.667127	0.70474	-0.813336	0.780532	0.874995	0.239147	-0.764072	0.305827	-0.625582	-0.218654	-0.730143	0.15634	0.677675	0.68986	-0.797	0.728002	0.807805	0.335773	-0.756969	0.233697	-0.42293	-0.20821	-0.664174	0.165973	0.668466	0.6626	-0.751288	0.666724	0.693223	0.415518	-0.753347	0.257888	-0.171834	-0.120925	-0.635345	0.223145	0.673444	0.661507	-0.722557	0.640225
4	12	nucleoplasm and cytoplasm	0.22414	-0.258086	0.0330173	0.242183	0.815663	-0.242718	0.720108	0.371606	0.359701	-0.2894	0.346695	0.228267	0.744897	-0.199658	-0.0618928	0.388674	0.857411	-0.066082	0.648526	0.317685	0.264261	-0.162061	0.189816	-0.0473168	0.801901	-0.178395	-0.0759276	0.569174	0.875075	-0.00166603	0.629911	0.297969	0.2302	-0.102728	0.130701	-0.265264	0.814108	-0.170966	-0.164023	0.740572	0.812153	0.0244629	0.580047	0.283716	0.213209	-0.0783723	0.104142
4	13	ERGIC	0.372785	0.00488384	-0.148702	0.284292	0.203545	0.0324381	0.214589	0.0837315	0.0690792	-0.0144301	0.0691966	0.046049	0.599911	0.0560355	-0.171021	0.377704	0.253602	0.137918	0.190233	0.0368506	0.00181362	0.0758974	-0.0324994	-0.178619	0.6283	0.0675758	-0.141033	0.449237	0.257683	0.148376	0.176462	0.0267779	-0.00833149	0.0937702	-0.0379129	-0.261766	0.60268	0.0695756	-0.104787	0.522661	0.275244	0.123536	0.173296	0.0253508	-0.00245814	0.078506	-0.00683312
4	14	ER	0.0939371	0.0204444	-0.268452	0.452191	0.348667	0.179612	0.321436	0.0696965	0.00850748	0.0876821	-0.0857825	-0.286826	0.624428	0.0727383	-0.216543	0.445814	0.266532	0.205664	0.221821	0.0249532	-0.0290289	0.138985	-0.11407	-0.345844	0.580032	0.0848137	-0.150902	0.474626	0.241634	0.156459	0.194316	0.0143883	-0.0215423	0.115495	-0.0598289	-0.282912	0.50489	0.0812379	-0.0650804	0.445683	0.209189	0.100143	0.167662	0.0167603	-0.00558579	0.0758298	0.00514323
4	15	ER	0.0526672	0.0217	-0.316517	0.544993	0.65705	0.356234	0.37992	0.0423888	-0.068799	0.251746	-0.294992	-0.701851	0.659733	0.073233	-0.183087	0.433621	0.439601	0.20451	0.227401	0.00490345	-0.048072	0.153991	-0.130807	-0.384501	0.486249	0.0754571	-0.0128524	0.324629	0.41878	0.086256	0.214626	0.0123863	-0.00568971	0.0680805	0.000934273	-0.13696	0.378272	0.0646586	0.211465	0.199564	0.395038	0.00372378	0.201403	0.0251179	0.024641	0.0130971	0.0916127
4	16	structured cytoplasm	0.330935	-0.17327	0.486158	-0.824552	-0.099528	-0.369562	-0.0200285	0.243483	0.283307	-0.315821	0.457691	0.942182	0.0284682	-0.31514	0.314722	-0.546929	0.0158694	-0.445929	0.0569812	0.357998	0.376898	-0.453853	0.540214	0.878298	0.186603	-0.372571	0.239054	-0.302386	0.0737376	-0.449622	0.0820452	0.394566	0.400673	-0.491108	0.544118	0.778935	0.29547	-0.385342	0.134651	-0.0158359	0.0784769	-0.419214	0.0734877	0.389991	0.389333	-0.480831	0.510004
4	17	nucleoli	0.208158	1.00437	-0.419546	0.416092	-0.716324	0.8076	-0.917645	-1.07087	-1.01298	0.928938	-0.930244	-0.525469	-1.51668	0.960994	-0.298522	-0.175716	-0.774262	0.726521	-0.894627	-1.01638	-0.951816	0.864639	-0.849967	0.112526	-1.60196	0.94072	-0.190783	-1.26906	-0.788687	0.722061	-0.880544	-0.992672	-0.933483	0.859002	-0.850133	0.583618	-1.66657	0.926883	-0.0435772	-2.53749	-0.80079	0.734973	-0.871709	-0.974713	-0.924345	0.864189	-0.860555
4	18	nucleoli	0.346484	0.591465	-0.442703	0.0929366	-0.963388	0.577322	-0.982516	-0.742942	-0.717325	0.566149	-0.644563	0.00863131	-1.41793	0.64078	-0.415105	0.0106179	-0.974574	0.600021	-0.95242	-0.7822	-0.753455	0.609274	-0.682547	0.184951	-1.43327	0.68501	-0.472951	-0.235841	-0.968971	0.656154	-0.937865	-0.813484	-0.790598	0.680823	-0.760357	0.212758	-1.41112	0.729368	-0.555436	-0.658496	-0.965482	0.715614	-0.928084	-0.842606	-0.825209	0.754425	-0.839692
4	19	nucleoli	0.337283	0.454567	-0.437472	0.12104	-0.97659	0.50672	-0.915552	-0.657761	-0.631331	0.524966	-0.649954	-0.647592	-0.878602	0.494664	-0.409139	-0.0779486	-0.989024	0.553294	-0.889227	-0.688149	-0.668684	0.585531	-0.69586	-0.628121	-0.900363	0.506815	-0.459464	-0.457753	-0.980941	0.598458	-0.867116	-0.691217	-0.683484	0.628579	-0.740857	-0.653873	-0.907588	0.520502	-0.537032	-0.973591	-0.977369	0.651481	-0.857845	-0.701321	-0.70423	0.674346	-0.791782
4	20	ER	0.264673	-0.275052	-0.143526	-1.57469	-0.726816	-0.281866	-0.584004	0.0153795	0.0549173	-0.351336	0.218649	0.928762	-0.781568	-0.29213	-0.197271	-1.87578	-0.750092	-0.229551	-0.585629	-0.0207054	0.0111136	-0.339457	0.149968	0.934173	-0.759866	-0.26927	-0.276118	-1.9085	-0.748525	-0.148957	-0.583221	-0.0486969	-0.0333527	-0.276727	0.062077	0.88508	-0.654324	-0.246995	-0.392537	-1.65272	-0.758627	-0.0575473	-0.589306	-0.070249	-0.0715371	-0.205387	-0.0261725
4	21	nucleoplasm	0.398666	1.05141	-0.463152	0.6355	-0.544995	0.858381	-0.901115	-1.14341	-1.07909	0.982352	-1.01584	-1.1221	-1.71759	1.01971	-0.409647	0.601181	-0.597548	0.809405	-0.874219	-1.10665	-1.04186	0.943791	-0.982789	-1.17292	-1.73021	1.00687	-0.440482	0.611243	-0.61104	0.818958	-0.858737	-1.09134	-1.03301	0.948303	-1.00674	-1.22733	-1.71299	1.00796	-0.516958	0.634231	-0.616672	0.849242	-0.848835	-1.09077	-1.0397	0.971562	-1.05182
4	22	uniform cytoplasm	0.601301	0.21508	-0.130519	0.247707	0.0513852	0.157334	-0.0414048	-0.143869	-0.141686	0.164404	-0.0981423	0.00536565	0.183841	0.210452	-0.150874	0.347759	0.110267	0.19248	-0.0373163	-0.142084	-0.151039	0.182035	-0.135115	-0.180567	0.234565	0.210123	-0.18627	0.472646	0.0818704	0.211613	-0.0585528	-0.148735	-0.160904	0.197327	-0.158166	-0.310384	0.237276	0.206746	-0.196881	0.550576	0.0872016	0.210225	-0.0621052	-0.148786	-0.158917	0.195099	-0.156076
4	23	vesicles	0.922208	-0.838408	4.52927e-05	-0.920685	-0.58273	-0.750643	-0.144352	0.737165	0.720452	-0.868452	0.781618	1.18527	0.413176	-0.874425	-0.0531085	-0.897626	-0.623055	-0.684897	-0.18682	0.718069	0.693432	-0.885251	0.757765	1.31489	0.436172	-0.852067	-0.0855701	-0.940462	-0.643364	-0.605872	-0.213591	0.67708	0.642354	-0.828449	0.697077	1.31002	0.478863	-0.863406	-0.0513096	-0.846868	-0.597766	-0.588742	-0.178175	0.688068	0.648543	-0.819654	0.699082
4	24	mitochondria	0.39668	0.447879	0.0650532	0.449845	2.4892	0.439731	0.596236	-0.37577	-0.392133	0.490493	-0.383829	-0.31678	0.175305	0.425474	0.583929	0.0819117	1.92275	0.264403	0.384043	-0.331314	-0.310666	0.369601	-0.182101	0.278609	-0.0209653	0.379132	1.33408	-0.372159	1.68239	0.179378	0.310985	-0.269802	-0.23333	0.291238	-0.0591615	0.676275	-0.0993032	0.352809	2.34313	-0.828981	1.51779	0.128546	0.262881	-0.240829	-0.204014	0.253013	0.0153964
4	25	cytoskeleton	0.343715	-1.28708	-0.26489	0.372902	0.0148534	-0.311105	0.839703	1.19342	0.950005	-0.653277	0.417945	-0.257279	1.44892	-1.09099	-0.110443	0.175057	0.00631033	-0.350224	0.722309	1.05026	0.887943	-0.587933	0.46843	-0.0917968	1.27444	-1.05362	0.122607	-0.0339358	0.100446	-0.528203	0.76603	1.04385	0.938506	-0.713843	0.663129	0.107127	1.17038	-1.0564	0.444404	-0.177334	0.201343	-0.685552	0.814026	1.05943	0.98904	-0.824693	0.826876
4	26	nucleoplasm	0.298671	-0.0487437	0.167924	-0.317778	-0.178112	-0.235583	-0.123023	0.0574348	0.102706	-0.163839	0.225036	0.518627	-0.0895509	-0.122018	0.0557546	-0.166664	-0.146838	-0.245943	-0.1005	0.0996701	0.132373	-0.219423	0.230151	0.42216	-0.000840938	-0.134471	-0.0222499	0.0491914	-0.135856	-0.210655	-0.0969286	0.102908	0.122673	-0.205948	0.18985	0.32031	0.0593164	-0.128674	-0.117222	0.244489	-0.157438	-0.148878	-0.116315	0.0868962	0.0943928	-0.169495	0.129576
4	27	nucleoli	0.136158	0.535763	-0.447757	0.499506	-0.781273	0.646946	-0.685266	-0.560677	-0.591489	0.653893	-0.669488	-0.81387	-0.0708999	0.5589	-0.40579	0.454807	-0.786186	0.625385	-0.671082	-0.58034	-0.596883	0.66306	-0.66929	-0.855518	-0.131945	0.560751	-0.438538	0.398683	-0.756902	0.606238	-0.642402	-0.577088	-0.58844	0.643687	-0.64954	-0.850928	-0.189906	0.560284	-0.480043	0.289632	-0.712705	0.588528	-0.613466	-0.570167	-0.577684	0.620229	-0.624139
4	28	structured cytoplasm	0.294242	-0.429131	0.133733	0.143007	0.515866	-0.395068	0.663902	0.534772	0.527947	-0.454623	0.505365	0.309736	0.843038	-0.34905	0.00549262	0.312299	0.611714	-0.215054	0.641659	0.465719	0.420918	-0.314016	0.345721	0.0416548	0.887397	-0.323179	-0.00852813	0.463469	0.59233	-0.164811	0.603616	0.440149	0.385452	-0.263452	0.300952	-0.137449	0.886449	-0.317499	0.00553495	0.574345	0.602346	-0.173427	0.588081	0.433501	0.383884	-0.263102	0.314338
4	29	nucleoplasm and cytoplasm	0.637711	-2.57307	0.287052	-2.64024	-0.722662	-2.31159	0.279391	1.9534	2.04941	-2.50167	2.00315	1.81469	0.729715	-2.33943	-0.0137868	-2.22656	-0.810382	-1.65719	0.1613	1.67855	1.64755	-2.02449	1.47172	1.60706	0.854125	-2.2372	-0.161604	-1.77118	-0.822302	-1.31093	0.132751	1.59055	1.47756	-1.74378	1.18513	1.27509	1.0346	-2.21787	-0.26195	-1.09453	-0.783677	-1.18279	0.219763	1.62112	1.46959	-1.62866	1.07737
4	30	mitochondria	0.379574	0.744245	-0.419882	0.508307	-0.583121	0.677673	-0.682943	-0.748866	-0.739355	0.732439	-0.721607	-0.723075	-0.495535	0.71968	-0.340395	0.361347	-0.606056	0.587284	-0.670916	-0.71598	-0.687398	0.662871	-0.629745	-0.397073	-0.586913	0.706716	-0.327309	0.224753	-0.603637	0.560443	-0.660297	-0.702399	-0.670239	0.640429	-0.602628	-0.186703	-0.65996	0.696824	-0.332592	0.0765945	-0.610411	0.557937	-0.65679	-0.692559	-0.662488	0.636365	-0.598856
4	31	cytoskeleton	0.167101	-0.672957	-0.0806352	0.332647	0.614148	-0.402029	0.990278	0.735553	0.672634	-0.563213	0.497465	-0.00614378	1.03166	-0.526944	-0.107454	0.407144	0.572892	-0.181816	0.862724	0.603137	0.518572	-0.343376	0.301111	-0.261562	0.989049	-0.482043	-0.0341388	0.478007	0.565412	-0.162974	0.828217	0.564722	0.488535	-0.301087	0.295319	-0.383606	0.947144	-0.46842	0.0476041	0.520649	0.606022	-0.206775	0.829335	0.555783	0.495156	-0.324474	0.346356
4	32	focal	0.182986	-0.921833	0.0846536	-0.843579	-0.439802	-0.79322	0.0485467	0.843148	0.83365	-0.936286	0.855904	1.04026	0.662532	-0.892335	0.0183088	-0.624566	-0.360826	-0.642721	0.0846765	0.814025	0.767665	-0.84801	0.744873	0.921692	0.753621	-0.892413	0.02538	-0.448993	-0.262354	-0.624447	0.16934	0.839339	0.782251	-0.834696	0.743005	0.794465	0.848134	-0.899051	0.0672652	-0.174858	-0.0735693	-0.638257	0.278406	0.866269	0.809388	-0.841956	0.770876
4	33	nucleoli	0.301036	0.0391444	-0.331425	0.0560471	-0.735335	0.171798	-0.553207	-0.0987858	-0.126476	0.0842305	-0.140764	-0.0126529	0.0328648	0.0687516	-0.333075	0.100569	-0.753456	0.241064	-0.555572	-0.139282	-0.176961	0.15098	-0.208161	-0.0504012	0.0165484	0.0861471	-0.382926	0.0857957	-0.75529	0.278469	-0.555577	-0.159427	-0.199187	0.191108	-0.247199	-0.112545	0.0170613	0.0985546	-0.442114	-0.0136836	-0.749219	0.302954	-0.552636	-0.173997	-0.212522	0.214512	-0.26863
4	34	uniform cytoplasm	0.41075	-0.685493	0.380012	0.0426015	0.847542	-0.71106	1.06772	0.803435	0.813751	-0.741561	0.782235	0.429637	0.780137	-0.623201	0.19337	0.226198	0.961869	-0.532668	1.05094	0.760418	0.726609	-0.628469	0.641007	0.21717	0.827754	-0.606772	0.252029	0.365397	1.04674	-0.492706	1.05701	0.751385	0.705863	-0.593573	0.623236	0.104385	0.832552	-0.605896	0.358301	0.482514	1.1524	-0.521294	1.08323	0.755432	0.718146	-0.607607	0.660244
4	35	uniform cytoplasm	0.191074	-0.516775	0.371021	-0.295294	0.243552	-0.632617	0.53387	0.629757	0.66816	-0.62842	0.737891	0.725188	0.745523	-0.481882	0.11139	0.0038271	0.236717	-0.459237	0.498389	0.590702	0.579064	-0.540223	0.590104	0.467771	0.847785	-0.468388	0.0540383	0.242557	0.325126	-0.389618	0.532427	0.584472	0.550296	-0.492196	0.530944	0.24198	0.908081	-0.458626	-0.0300166	0.455822	0.310971	-0.344253	0.506634	0.568987	0.525234	-0.460057	0.484797
4	36	ER	0.107813	0.296529	-0.327026	0.518275	-0.0312639	0.398915	-0.0456443	-0.270986	-0.310475	0.367603	-0.39895	-0.660023	-0.00382889	0.31888	-0.239791	0.437291	-0.117742	0.335531	-0.118515	-0.280465	-0.296949	0.341397	-0.337458	-0.518868	-0.0936676	0.321594	-0.170464	0.437359	-0.123749	0.267951	-0.127446	-0.278292	-0.273465	0.297108	-0.270735	-0.364665	-0.168636	0.313333	-0.0717839	0.350224	-0.132771	0.218704	-0.135417	-0.269126	-0.254189	0.265066	-0.221116
4	37	nucleoli	0.45972	1.05856	-0.451823	0.486564	-0.784092	0.862939	-0.993414	-1.1584	-1.09184	0.995549	-1.03083	-0.953594	-1.98075	1.02227	-0.379406	0.135218	-0.831725	0.800471	-0.958954	-1.1122	-1.04338	0.942725	-0.976838	-0.621077	-2.00235	1.00784	-0.378864	-0.479191	-0.84306	0.807903	-0.941005	-1.09372	-1.03139	0.944526	-0.996415	-0.491417	-1.97635	1.00533	-0.384104	-1.21384	-0.851924	0.835285	-0.930258	-1.08814	-1.03407	0.963917	-1.03551
4	38	mitochondria	0.338988	-0.200949	-0.179072	-0.497169	-0.677491	-0.137351	-0.428993	0.0944811	0.095932	-0.181686	0.119351	0.52673	0.0439256	-0.30433	-0.130222	-0.538489	-0.626134	-0.240231	-0.325211	0.214975	0.212597	-0.321194	0.25379	0.714651	0.143349	-0.296344	-0.117697	-0.768341	-0.6311	-0.206796	-0.334643	0.19695	0.190158	-0.299489	0.236998	0.826337	0.125553	-0.30998	-0.0523318	-0.888926	-0.593415	-0.218212	-0.297337	0.214559	0.208345	-0.312305	0.266887
4	39	Golgi	0.41324	-1.34971	0.941418	-1.76265	-0.127463	-1.51159	0.471169	1.28911	1.35041	-1.4982	1.50917	1.66983	0.443098	-1.45481	0.59352	-1.53219	-0.156535	-1.4475	0.468065	1.33256	1.35607	-1.54766	1.45905	1.63116	0.599728	-1.45071	0.430378	-1.20803	-0.159542	-1.33505	0.458797	1.31045	1.30286	-1.48545	1.34864	1.4726	0.752607	-1.43147	0.217054	-0.698813	-0.198488	-1.21234	0.421649	1.27559	1.24285	-1.40671	1.22452
4	40	nucleoli	0.204442	0.917891	-0.440036	0.381161	-0.858046	0.780675	-0.940632	-0.981046	-0.939695	0.878401	-0.88526	-0.567544	-1.2799	0.884838	-0.352427	-0.125817	-0.877086	0.705028	-0.906993	-0.939436	-0.888545	0.81657	-0.810684	-0.0547345	-1.36916	0.866673	-0.307463	-1.05259	-0.874159	0.691482	-0.887428	-0.918719	-0.87066	0.802624	-0.800579	0.36751	-1.44649	0.852794	-0.250262	-2.1263	-0.876658	0.694942	-0.875969	-0.901891	-0.859937	0.799705	-0.801401
4	41	Golgi	0.620323	-0.839124	0.708387	-1.64574	-0.291956	-1.09103	0.116612	0.835524	0.888221	-1.02455	1.11566	1.57475	0.157474	-1.03402	0.522249	-1.42438	-0.266567	-1.19127	0.17653	0.964231	1.00965	-1.20985	1.21039	1.58729	0.349824	-1.05732	0.360462	-1.0946	-0.269477	-1.12871	0.165436	0.958195	0.98409	-1.19654	1.14131	1.48263	0.518021	-1.06255	0.25371	-0.668789	-0.271814	-1.06361	0.159481	0.947745	0.960557	-1.16508	1.07833
4	42	nucleoplasm and cytoplasm	0.469455	-0.877087	1.21239	-0.776279	0.410002	-1.19264	0.793145	0.934124	1.0441	-1.03257	1.12896	0.93724	0.459177	-0.898835	1.22743	-0.463175	0.800643	-1.15836	1.05522	0.992915	1.07157	-1.03169	1.11818	0.832483	0.585198	-0.910171	0.978878	-0.153405	0.818903	-1.10208	1.06675	1.00676	1.05517	-1.01177	1.06119	0.69844	0.670204	-0.90629	0.806671	0.186683	0.85692	-1.03235	1.06533	0.996735	1.02193	-0.972064	0.986138
4	43	mitochondria	0.567781	-1.15465	0.84211	-0.832154	0.129622	-1.32343	0.712332	1.19846	1.24928	-1.28059	1.31998	1.25359	0.682535	-1.20584	0.784138	-0.870429	0.127747	-1.31871	0.717469	1.22755	1.26971	-1.33115	1.34804	1.37724	0.692751	-1.21853	0.858325	-0.991277	0.0823315	-1.33887	0.675316	1.22072	1.26548	-1.35796	1.38416	1.50242	0.69235	-1.23884	1.12447	-0.963485	0.132117	-1.40629	0.71544	1.24145	1.2978	-1.4019	1.46488
4	44	nucleoplasm and cytoplasm	0.312893	-1.00408	0.550816	-0.165958	0.875871	-1.00913	1.221	1.10976	1.12719	-1.05688	1.08718	0.736441	1.03403	-0.908657	0.311093	0.104915	1.07699	-0.748983	1.22712	1.03902	0.991797	-0.876821	0.875803	0.449275	1.11315	-0.876854	0.205442	0.361837	1.11366	-0.628585	1.2089	1.01234	0.929936	-0.785099	0.771676	0.163787	1.15997	-0.86477	0.165436	0.582029	1.20579	-0.592326	1.22125	1.00293	0.911098	-0.754413	0.735375
4	45	nucleoli and cytoplasm	0.229196	0.221947	-0.307638	0.517768	0.288291	0.359118	0.0711624	-0.170178	-0.221747	0.30699	-0.313361	-0.587027	0.341434	0.255744	-0.248772	0.509171	0.222664	0.353028	0.00641158	-0.19537	-0.236386	0.329957	-0.308647	-0.600503	0.279066	0.259612	-0.198016	0.544817	0.203949	0.310681	-0.0114225	-0.19606	-0.222327	0.300287	-0.257596	-0.521856	0.212021	0.253807	-0.127586	0.523021	0.192739	0.267482	-0.0220763	-0.189256	-0.205463	0.266649	-0.206239
4	47	structured cytoplasm	0.56688	-1.05368	0.830285	-1.69911	-0.278137	-1.25921	0.203945	0.998918	1.05738	-1.22237	1.2548	1.527	0.142758	-1.22541	0.536737	-1.50453	-0.307358	-1.29365	0.217287	1.09628	1.13096	-1.35888	1.28124	1.52395	0.31342	-1.23347	0.374494	-1.22075	-0.324151	-1.20209	0.198343	1.08003	1.09005	-1.31953	1.18969	1.39964	0.478578	-1.23734	0.223147	-0.692067	-0.316914	-1.13062	0.20436	1.07489	1.06821	-1.28375	1.11936
4	48	ER	0.210704	-0.435143	0.488054	-0.539417	-0.234814	-0.613293	0.131281	0.452479	0.500125	-0.535327	0.585504	0.561907	0.223934	-0.470609	0.376235	-0.606742	-0.273581	-0.628694	0.129228	0.473809	0.52208	-0.563004	0.591846	0.588001	0.256565	-0.480604	0.356887	-0.663365	-0.315895	-0.639089	0.110991	0.475074	0.523065	-0.572062	0.597079	0.638064	0.264319	-0.4911	0.331403	-0.557172	-0.308354	-0.648623	0.113773	0.480194	0.525678	-0.588082	0.612737
5	1	nucleoplasm	0.399412	0.993358	-0.452701	0.61302	-0.504053	0.812573	-0.817025	-1.05896	-1.00197	0.924133	-0.933908	-0.872513	-1.313	0.967891	-0.405458	0.610438	-0.535239	0.778737	-0.793694	-1.0306	-0.97564	0.899235	-0.921348	-1.06159	-1.30724	0.956648	-0.439738	0.661921	-0.548519	0.789955	-0.781626	-1.01707	-0.968046	0.906438	-0.946983	-1.16081	-1.29881	0.956252	-0.468206	0.63286	-0.482246	0.811292	-0.754606	-1.01294	-0.970242	0.922055	-0.975768
5	2	structured cytoplasm	0.133937	0.387222	-0.376585	0.608884	0.658698	0.548882	0.0972666	-0.32957	-0.389894	0.521307	-0.539483	-0.934775	0.385239	0.423589	-0.306539	0.609303	0.452377	0.502488	-0.0121849	-0.365651	-0.401706	0.511526	-0.493217	-0.874863	0.266304	0.428738	-0.261255	0.666883	0.385201	0.456951	-0.0427946	-0.367964	-0.387442	0.474544	-0.438231	-0.791589	0.181166	0.428525	-0.220169	0.689612	0.339591	0.424262	-0.0616297	-0.36591	-0.376686	0.447939	-0.398993
5	3	nucleoli and cytoplasm	0.38106	-0.562492	-0.0703889	0.411384	0.819648	-0.314506	1.03041	0.64996	0.569142	-0.448163	0.387601	-0.186793	0.958275	-0.468052	-0.0678511	0.443394	0.77115	-0.178398	0.899474	0.582093	0.486408	-0.309876	0.274067	-0.326782	0.916969	-0.433573	0.00246836	0.522215	0.771896	-0.202772	0.863102	0.555964	0.47588	-0.308524	0.306889	-0.346745	0.856642	-0.432678	0.0691779	0.575481	0.739788	-0.264637	0.824512	0.554711	0.491189	-0.348084	0.369934
5	4	cytoskeleton	0.162773	-0.763205	0.654528	-0.991333	-0.126436	-0.954121	0.299071	0.742773	0.814681	-0.88694	0.928586	0.910289	0.344755	-0.788234	0.502402	-0.786314	-0.0665097	-0.901723	0.378231	0.766155	0.816373	-0.874988	0.87706	0.784397	0.466288	-0.780898	0.344088	-0.58053	-0.0972082	-0.82339	0.35354	0.749954	0.77745	-0.826724	0.799576	0.637926	0.556311	-0.77564	0.324096	-0.290884	-0.0974591	-0.795913	0.368637	0.749256	0.767493	-0.801679	0.76769
5	5	cytoskeleton	0.329	0.366742	-0.168921	0.249972	-0.036384	0.279544	-0.181784	-0.326772	-0.297841	0.312832	-0.253543	-0.305729	0.0801838	0.394649	-0.185925	0.373789	0.0255453	0.316844	-0.144738	-0.351403	-0.331262	0.347162	-0.294097	-0.472419	0.0790817	0.396999	-0.141119	0.453275	0.117058	0.321269	-0.0974596	-0.34561	-0.327416	0.353991	-0.294081	-0.567587	0.0754181	0.400469	-0.126124	0.469918	0.0875145	0.331865	-0.110513	-0.350407	-0.334536	0.364129	-0.303067
5	6	nucleoplasm	0.124894	0.79651	-0.443626	0.639795	-0.101056	0.754727	-0.506276	-0.80251	-0.796875	0.816678	-0.828609	-1.06486	-0.443211	0.792077	-0.384859	0.643279	-0.184182	0.701742	-0.527646	-0.798914	-0.780971	0.786486	-0.784913	-1.05709	-0.519567	0.786262	-0.395791	0.707201	-0.227778	0.68776	-0.535236	-0.791966	-0.770748	0.77169	-0.771595	-1.01986	-0.575451	0.783604	-0.412725	0.683427	-0.252227	0.689945	-0.538702	-0.787081	-0.766818	0.770319	-0.772527
5	7	structured cytoplasm	0.0956458	-0.378203	0.533366	-0.24951	0.532567	-0.539806	0.609616	0.479199	0.527764	-0.493049	0.607523	0.549112	0.458294	-0.373634	0.326744	-0.0290492	0.703573	-0.458765	0.672654	0.485562	0.50027	-0.460715	0.537978	0.368662	0.550031	-0.378679	0.287347	0.155931	0.792571	-0.414645	0.695446	0.49175	0.487526	-0.43806	0.499644	0.181968	0.608315	-0.379563	0.218519	0.382261	0.823384	-0.396412	0.690783	0.489386	0.478098	-0.426322	0.47674
5	8	ER	0.108862	0.723844	-0.444033	0.590464	-0.472827	0.720634	-0.600298	-0.743538	-0.746307	0.767948	-0.793432	-1.00688	-0.620664	0.72276	-0.400844	0.589892	-0.529108	0.670314	-0.611597	-0.738135	-0.729116	0.737926	-0.753008	-0.976993	-0.673578	0.719203	-0.437621	0.625893	-0.542689	0.649663	-0.609918	-0.73333	-0.719298	0.71696	-0.736037	-0.931298	-0.720967	0.717632	-0.485252	0.601289	-0.521931	0.641106	-0.596284	-0.728636	-0.713142	0.707639	-0.729455
5	9	plasma membrane	0.0526997	0.0487324	-0.345245	0.538829	0.347981	0.346144	0.267066	0.0184405	-0.0777864	0.245794	-0.268349	-0.581863	0.734377	0.12175	-0.306684	0.582485	0.329628	0.380544	0.193467	-0.0474968	-0.13193	0.322053	-0.316716	-0.750223	0.687761	0.139635	-0.283465	0.656894	0.293384	0.34625	0.157943	-0.0641839	-0.133099	0.298532	-0.276343	-0.779964	0.617465	0.144948	-0.290463	0.717375	0.273238	0.295675	0.138946	-0.0674613	-0.121277	0.252546	-0.217242
5	10	nucleoplasm	0.0928128	0.911667	-0.450596	0.621636	-0.370824	0.795015	-0.701083	-0.952755	-0.919494	0.883621	-0.901232	-1.03734	-0.985239	0.894249	-0.390959	0.596211	-0.415572	0.735069	-0.692702	-0.933345	-0.890162	0.841117	-0.849144	-0.940903	-1.05416	0.884567	-0.400264	0.5873	-0.43612	0.729675	-0.686693	-0.921709	-0.879006	0.835368	-0.850209	-0.890739	-1.08349	0.882932	-0.417085	0.503763	-0.447556	0.744215	-0.682583	-0.918046	-0.879549	0.846064	-0.870295
5	11	ER	0.0940622	0.215576	-0.161318	-0.105887	-0.526366	0.13998	-0.420683	-0.165078	-0.155428	0.145696	-0.0712978	0.404764	0.0842548	0.177486	-0.184409	0.0111661	-0.469071	0.140227	-0.372372	-0.131616	-0.134837	0.110788	-0.0565541	0.391544	0.139347	0.177352	-0.244042	0.0668374	-0.487431	0.166766	-0.386018	-0.142111	-0.151356	0.123169	-0.0832485	0.331878	0.151836	0.182704	-0.287886	0.132394	-0.470528	0.173976	-0.375631	-0.149098	-0.15757	0.129007	-0.08727
5	12	nucleoplasm and cytoplasm	0.196269	0.231971	0.0709257	0.232831	0.695556	0.0936673	0.288025	-0.117209	-0.0886037	0.136002	0.00279524	0.217072	0.273828	0.246475	-0.0671978	0.420083	0.832516	0.175831	0.293067	-0.129492	-0.128402	0.180039	-0.0823236	-0.0655027	0.369233	0.248682	-0.113787	0.631672	0.920081	0.228494	0.305938	-0.130923	-0.147539	0.213956	-0.137614	-0.34071	0.424263	0.250423	-0.177242	0.818109	0.993584	0.25467	0.319801	-0.131924	-0.155842	0.234191	-0.167278
5	13	ERGIC	0.437031	-0.0353616	-0.0609562	-0.121792	-0.119826	-0.112905	-0.0581232	0.0815855	0.083739	-0.121528	0.177879	0.554478	0.118144	-0.0941067	-0.141065	-2.04114e-05	-0.143567	-0.0765213	-0.0934804	0.092113	0.079482	-0.154897	0.154538	0.469693	0.176264	-0.0936893	-0.181065	0.147962	-0.169467	-0.0405909	-0.118796	0.0738158	0.0548263	-0.133763	0.118643	0.393016	0.196386	-0.091574	-0.208923	0.268146	-0.153001	-0.0160927	-0.119318	0.0615972	0.0432904	-0.118186	0.100893
5	14	ER	0.0547555	0.183598	-0.293305	0.436962	0.0199094	0.263404	0.034716	-0.132278	-0.166184	0.215798	-0.216216	-0.298851	0.208092	0.216894	-0.252836	0.423269	-0.0400169	0.279806	-0.0337632	-0.157139	-0.186043	0.250056	-0.238362	-0.342632	0.180172	0.223343	-0.200684	0.402895	-0.0379837	0.231528	-0.0427426	-0.160626	-0.174585	0.222088	-0.188109	-0.263068	0.117499	0.218832	-0.138873	0.341281	-0.0560956	0.185439	-0.0573364	-0.156795	-0.159688	0.191974	-0.139939
5	15	ER	0.334387	0.875907	-0.460155	0.580276	-0.742893	0.777591	-0.83609	-0.914453	-0.88726	0.859815	-0.870319	-0.972619	-0.818012	0.860099	-0.413155	0.515088	-0.770898	0.713664	-0.815304	-0.895987	-0.856231	0.811297	-0.815115	-0.814392	-0.899984	0.851174	-0.450658	0.468337	-0.764701	0.706035	-0.798063	-0.885918	-0.846103	0.803725	-0.814963	-0.747142	-0.941914	0.850095	-0.516067	0.36998	-0.755316	0.720198	-0.785215	-0.883113	-0.847012	0.814147	-0.83551
5	16	structured cytoplasm	0.297161	-0.34299	0.268197	-0.110298	0.426372	-0.440136	0.509853	0.467484	0.480387	-0.438717	0.543134	0.591656	0.611965	-0.355118	0.104435	0.0757989	0.473203	-0.350114	0.48315	0.468356	0.449772	-0.412959	0.470598	0.414106	0.704552	-0.353096	0.0788055	0.24497	0.494829	-0.312991	0.470192	0.458469	0.428557	-0.390814	0.438771	0.283931	0.735027	-0.351237	0.0952786	0.41308	0.540516	-0.311751	0.476769	0.45454	0.427382	-0.386697	0.438911
5	17	nucleoli	0.343795	1.00101	-0.474948	0.402062	-1.02218	0.837019	-1.08368	-1.0987	-1.0431	0.941598	-0.975625	-0.27203	-1.84721	1.00637	-0.426297	-0.0614813	-1.0258	0.803335	-1.03375	-1.09619	-1.03172	0.938693	-0.976263	-0.594301	-1.82958	0.992151	-0.467622	-0.922428	-1.01501	0.812904	-1.00731	-1.07984	-1.02215	0.942978	-1.00007	-0.499289	-1.82014	0.990737	-0.545466	-1.87725	-1.01342	0.843203	-0.993443	-1.07678	-1.02717	0.963368	-1.04214
5	18	nucleoli	0.253164	0.536436	-0.444542	0.348033	-0.838236	0.598695	-0.800369	-0.580275	-0.594947	0.581732	-0.604748	-0.370571	-0.24073	0.578081	-0.415038	0.304777	-0.863686	0.610563	-0.790945	-0.618769	-0.625456	0.627861	-0.64544	-0.488237	-0.285035	0.593794	-0.46977	0.208029	-0.86032	0.622371	-0.779206	-0.631789	-0.63622	0.646389	-0.667278	-0.571086	-0.319183	0.60789	-0.551855	0.0210423	-0.855137	0.640641	-0.769704	-0.642872	-0.646957	0.664187	-0.689127
5	19	nucleoli	0.369722	0.378629	-0.45143	-0.046153	-1.00831	0.511322	-1.03248	-0.698828	-0.68454	0.404306	-0.58966	0.78731	-1.8065	0.641019	-0.415491	-0.354166	-1.02182	0.634211	-1.01044	-0.859266	-0.826239	0.642705	-0.756695	0.264426	-1.76225	0.700181	-0.461512	-1.1584	-1.01631	0.690796	-0.991927	-0.887125	-0.85898	0.721463	-0.830941	0.182291	-1.70022	0.737141	-0.532358	-2.17816	-1.01316	0.745274	-0.979831	-0.905566	-0.884273	0.782472	-0.89963
5	20	ER	0.186922	-0.782553	0.692417	-1.73679	-0.440658	-0.990892	-0.024737	0.680599	0.741244	-0.929481	0.940089	1.31727	-0.214137	-0.939457	0.433926	-1.66871	-0.487868	-1.05251	-0.0159778	0.761781	0.811285	-1.05866	0.975696	1.30944	-0.0708631	-0.97029	0.337046	-1.45915	-0.469436	-1.02643	0.0166767	0.772604	0.810728	-1.0553	0.933478	1.2296	0.0837921	-0.994978	0.302637	-1.02085	-0.413201	-1.0231	0.0802125	0.800192	0.832004	-1.05463	0.918228
5	21	nucleoplasm	0.251221	1.00833	-0.452309	0.650215	-0.0786505	0.853326	-0.737952	-1.09155	-1.03832	0.975737	-1.00684	-1.30312	-1.40738	0.981367	-0.393632	0.646208	-0.209523	0.79538	-0.737945	-1.05835	-1.00102	0.929507	-0.95894	-1.24394	-1.45177	0.969399	-0.404058	0.691691	-0.258887	0.801249	-0.733352	-1.04247	-0.990405	0.930917	-0.97624	-1.27407	-1.44723	0.969614	-0.417172	0.637612	-0.28825	0.827411	-0.730188	-1.03978	-0.994724	0.950312	-1.01322
5	22	uniform cytoplasm	0.370871	-0.328004	-0.0758747	0.36449	0.632559	-0.199403	0.757224	0.440081	0.389654	-0.284561	0.28715	-0.0292459	0.847444	-0.250755	-0.081312	0.416975	0.669476	-0.0708201	0.688696	0.381982	0.314679	-0.162864	0.173995	-0.206688	0.844093	-0.225553	-0.045643	0.507762	0.631427	-0.0676156	0.6337	0.357713	0.297022	-0.143786	0.180467	-0.258781	0.800991	-0.223866	0.0130149	0.544749	0.593222	-0.111453	0.594959	0.354211	0.308019	-0.170866	0.228543
5	23	vesicles	0.117071	0.56378	-0.352243	0.378787	-0.545873	0.543716	-0.562539	-0.54405	-0.549566	0.572455	-0.539785	-0.456271	-0.10254	0.55261	-0.291316	0.152184	-0.575559	0.473697	-0.565479	-0.528604	-0.516125	0.516001	-0.465883	-0.149983	-0.212732	0.538524	-0.257894	-0.148414	-0.558305	0.435057	-0.551686	-0.513722	-0.494714	0.481143	-0.419701	0.0965865	-0.297113	0.5291	-0.228493	-0.406305	-0.547667	0.417012	-0.542997	-0.504528	-0.484561	0.466633	-0.397293
5	24	mitochondria	0.255251	0.693865	-0.381681	0.492556	-0.299294	0.64244	-0.508411	-0.673804	-0.670869	0.688329	-0.660181	-0.599252	-0.273791	0.678956	-0.251384	0.197863	-0.405281	0.528889	-0.542096	-0.653965	-0.621326	0.607386	-0.539889	-0.105207	-0.438425	0.66707	-0.145045	-0.155503	-0.423665	0.493331	-0.541498	-0.641368	-0.602431	0.582855	-0.501298	0.17944	-0.533381	0.65502	-0.0709336	-0.467062	-0.458442	0.485912	-0.550069	-0.629748	-0.592712	0.575996	-0.490445
5	25	cytoskeleton	0.146172	-0.389265	-0.287161	0.312728	-0.326783	-0.0587965	0.0933228	0.383604	0.304256	-0.221395	0.129365	-0.170498	0.861035	-0.274195	-0.268045	0.306721	-0.347996	0.0572232	0.0401137	0.2801	0.201492	-0.0791681	0.0249559	-0.265327	0.790044	-0.24982	-0.240185	0.268922	-0.314842	0.0330192	0.0522044	0.264082	0.199409	-0.0840366	0.0590388	-0.276304	0.734007	-0.24499	-0.194375	0.227967	-0.270337	-0.0194642	0.0808548	0.267018	0.216422	-0.12105	0.122731
5	26	nucleoplasm	0.690146	-1.27862	0.437723	-2.17482	-0.568082	-1.35892	-0.109033	1.0546	1.07986	-1.41438	1.31776	2.04163	-0.0600982	-1.53587	0.264137	-2.05243	-0.58448	-1.40814	-0.136146	1.1379	1.14759	-1.61404	1.39108	2.19025	0.071289	-1.56738	0.0839604	-1.68214	-0.621493	-1.30518	-0.166934	1.10541	1.0921	-1.5787	1.29013	2.19182	0.231971	-1.59967	-0.023373	-1.13612	-0.602038	-1.23073	-0.154866	1.10631	1.07586	-1.545	1.22177
5	27	nucleoli	0.199126	0.791836	-0.424829	0.480129	-0.681664	0.678294	-0.730975	-0.818393	-0.784681	0.744632	-0.727703	-0.635593	-0.651318	0.785132	-0.396331	0.496024	-0.700641	0.672635	-0.714343	-0.810473	-0.780675	0.747976	-0.743621	-0.77387	-0.65322	0.778454	-0.427682	0.501629	-0.668064	0.676089	-0.68684	-0.800405	-0.774713	0.753043	-0.755968	-0.80621	-0.673993	0.777493	-0.49248	0.464591	-0.658929	0.686631	-0.674657	-0.796571	-0.774902	0.760032	-0.770296
5	28	structured cytoplasm	0.523646	0.17815	0.00570236	-0.22183	-0.176876	0.0522638	-0.188944	-0.132295	-0.116244	0.085661	-0.00423935	0.348261	-0.26503	0.0665023	-0.063261	-0.0758552	-0.143996	0.00331876	-0.169302	-0.0585899	-0.0563555	-0.0154345	0.0479286	0.241345	-0.174437	0.0289433	-0.0655275	0.0405764	-0.0791267	-0.00725062	-0.143994	-0.0426548	-0.0448686	-0.0408079	0.0531119	0.162334	-0.132315	0.00255806	-0.0999984	0.265738	-0.0850672	-0.0170156	-0.149208	-0.0340047	-0.0351258	-0.0599303	0.0595693
5	29	nucleoplasm and cytoplasm	0.379999	-1.19152	1.52912	-2.68522	-0.160011	-1.57903	0.310306	1.14854	1.22214	-1.43801	1.57676	1.97848	-0.12566	-1.56537	1.13412	-2.78382	-0.241085	-1.88629	0.336051	1.37528	1.4693	-1.8086	1.80724	2.0726	0.0899305	-1.70802	1.09248	-2.49677	-0.197158	-2.00964	0.41365	1.48201	1.58133	-1.93097	1.87924	2.06864	0.349172	-1.74536	0.919927	-1.74922	-0.195452	-1.97522	0.431686	1.49527	1.58404	-1.92635	1.81844
5	30	mitochondria	0.184924	0.446114	-0.379546	0.257454	-0.711107	0.471802	-0.607285	-0.428535	-0.449293	0.465553	-0.437212	-0.225935	0.0374697	0.426271	-0.257699	-0.245595	-0.719467	0.344985	-0.595264	-0.403675	-0.389827	0.365236	-0.298979	0.295592	-0.146866	0.396895	-0.124777	-0.849736	-0.652973	0.266567	-0.547746	-0.369107	-0.344265	0.301734	-0.201811	0.676202	-0.246886	0.36933	0.0558264	-1.27127	-0.593472	0.208392	-0.505064	-0.336446	-0.308082	0.258053	-0.127483
5	31	cytoskeleton	0.195547	-0.533173	-0.267411	0.450926	0.234809	-0.050562	0.558305	0.514496	0.390185	-0.236152	0.112571	-0.329301	0.823212	-0.399033	-0.222442	0.446676	0.208771	0.060039	0.458495	0.408304	0.29351	-0.0779504	0.0141801	-0.4462	0.758474	-0.366953	-0.169701	0.474852	0.206373	0.0355557	0.43122	0.384661	0.287633	-0.0820581	0.0468049	-0.477936	0.706402	-0.358995	-0.132019	0.514494	0.221	-0.0211235	0.432389	0.384283	0.303193	-0.126767	0.107411
5	32	focal	0.119938	-1.10026	0.00491453	-0.815891	-0.559217	-0.853977	0.00363424	0.949228	0.933135	-1.05378	0.900277	0.999925	0.768366	-1.02491	-0.00390893	-0.835899	-0.530504	-0.697846	0.028831	0.880273	0.8376	-0.927742	0.799314	1.00018	0.760223	-1.00127	0.0156484	-1.05219	-0.538075	-0.642456	0.0114106	0.851571	0.803949	-0.874714	0.772329	0.986261	0.773748	-1.01792	0.117133	-1.14283	-0.503184	-0.679309	0.0477078	0.873196	0.832264	-0.899895	0.826766
5	33	nucleoli	0.170277	0.636526	-0.423398	0.526103	-0.546121	0.651232	-0.605192	-0.6272	-0.64259	0.679663	-0.672736	-0.75735	-0.13661	0.630104	-0.345173	0.371178	-0.591613	0.561027	-0.61178	-0.614029	-0.604373	0.620262	-0.585197	-0.435989	-0.259767	0.622543	-0.300016	0.0910676	-0.598275	0.521598	-0.607173	-0.605851	-0.586603	0.590486	-0.541292	-0.169235	-0.37136	0.612035	-0.218756	-0.324458	-0.602189	0.501714	-0.603836	-0.59476	-0.573219	0.573677	-0.511773
5	34	uniform cytoplasm	0.119681	-0.0239462	-0.26937	0.555876	1.06013	0.183249	0.686701	0.140642	0.0636965	0.0719945	-0.0841551	-0.474297	0.772687	0.0511014	-0.218924	0.578549	0.94835	0.251017	0.551472	0.0692723	-0.00551426	0.175539	-0.155834	-0.605405	0.709909	0.0682545	-0.133929	0.639941	0.870702	0.213471	0.493415	0.0530982	-0.00201293	0.162874	-0.10798	-0.57075	0.631336	0.0648741	0.000296689	0.635996	0.84793	0.149397	0.467182	0.0581349	0.0207689	0.115749	-0.0297538
5	35	uniform cytoplasm	0.181134	0.0888639	-0.16405	0.361675	0.292574	0.10021	0.193195	0.00396364	-0.0133162	0.0659735	-0.00657571	-0.0512687	0.499934	0.123596	-0.187744	0.445408	0.322175	0.187235	0.165768	-0.0241961	-0.0581248	0.138696	-0.0935881	-0.270953	0.537671	0.134717	-0.178231	0.545487	0.327368	0.203246	0.151118	-0.035108	-0.0702829	0.161177	-0.108887	-0.376109	0.515764	0.13324	-0.145572	0.578427	0.313493	0.190817	0.135165	-0.0345252	-0.0641275	0.155044	-0.0908879
5	36	ER	0.0751674	0.45018	-0.396477	0.575081	-0.0768763	0.576976	-0.235359	-0.409204	-0.460684	0.561239	-0.573106	-0.856347	0.189105	0.465147	-0.314031	0.523503	-0.149497	0.471959	-0.283293	-0.416396	-0.432543	0.486346	-0.460752	-0.63722	0.0600372	0.463743	-0.27529	0.504098	-0.174967	0.415615	-0.295914	-0.413928	-0.413962	0.443535	-0.399109	-0.481256	-0.0331137	0.456853	-0.239178	0.44391	-0.197583	0.383307	-0.306452	-0.40713	-0.40018	0.418776	-0.361738
5	37	nucleoli	0.505347	0.887602	-0.467596	0.203402	-0.983055	0.764931	-1.06966	-1.05335	-0.998397	0.815414	-0.897389	-0.0546965	-2.18621	0.979787	-0.421999	-0.160419	-0.998497	0.786742	-1.03004	-1.09444	-1.02951	0.902857	-0.956159	-0.262602	-2.15013	1.0056	-0.466372	-0.962797	-0.994576	0.823149	-1.00909	-1.10645	-1.04602	0.951906	-1.02188	-0.44043	-2.10091	0.997937	-0.53655	-1.99154	-0.992418	0.85133	-0.993798	-1.09793	-1.04665	0.967728	-1.06153
5	38	mitochondria	0.325726	-0.0380399	-0.204339	-0.182603	-0.614032	0.0293933	-0.416969	0.0420972	0.0152048	-0.0414655	0.0556619	0.466726	0.298116	-0.07513	-0.12124	-0.548163	-0.610695	-0.0544419	-0.41149	0.0649665	0.0550477	-0.129604	0.160771	0.844084	0.161544	-0.111405	-0.0346359	-1.06855	-0.606203	-0.136314	-0.407752	0.0869849	0.0873084	-0.205651	0.259491	1.19462	0.0532521	-0.16015	0.134095	-1.44261	-0.556357	-0.226472	-0.373631	0.12672	0.135241	-0.285296	0.369153
5	39	Golgi	0.182256	-0.763334	0.855137	-1.17835	-0.133565	-0.954478	0.210177	0.794458	0.834817	-0.915878	1.00559	1.45013	0.212587	-0.904544	0.571831	-0.915863	-0.130044	-1.00235	0.233648	0.885422	0.907663	-1.04139	1.05396	1.44202	0.380256	-0.933278	0.490583	-0.608408	-0.0771342	-0.978764	0.271459	0.902798	0.91116	-1.04241	1.02201	1.31523	0.522281	-0.917874	0.305437	-0.222776	-0.092547	-0.903184	0.254985	0.876786	0.871249	-0.993308	0.934604
5	40	nucleoli	0.185854	0.954926	-0.457388	0.404146	-0.928349	0.81378	-1.00321	-1.03789	-0.990138	0.919436	-0.938795	-0.649942	-1.45924	0.92469	-0.388755	-0.0945445	-0.941893	0.751661	-0.961522	-0.998582	-0.943931	0.873892	-0.88528	-0.201366	-1.51956	0.909682	-0.38629	-1.00851	-0.937112	0.752779	-0.939375	-0.980912	-0.931664	0.871623	-0.893952	0.0967386	-1.55785	0.903414	-0.380631	-2.11346	-0.933553	0.773277	-0.926442	-0.972206	-0.930746	0.883651	-0.917884
5	41	Golgi	0.459927	-0.992652	0.260053	-0.609434	-0.183573	-1.03352	0.497788	0.977637	0.992082	-1.02471	0.95915	1.02218	0.565912	-0.989116	0.111369	-0.402814	-0.185566	-0.871302	0.463646	0.966855	0.937559	-0.963817	0.866704	0.925835	0.654758	-0.963847	0.043246	-0.223556	-0.182003	-0.781306	0.44009	0.935554	0.886141	-0.903502	0.798191	0.789342	0.714992	-0.950821	-0.0453961	0.0252329	-0.19659	-0.713088	0.408312	0.911136	0.852871	-0.858043	0.738765
5	42	nucleoplasm and cytoplasm	0.0905793	-0.0686982	-0.109501	0.108921	0.177272	-0.0512164	0.139761	0.133278	0.110302	-0.0981741	0.151428	0.242032	0.511864	-0.0958175	-0.139003	0.20426	0.210101	-0.0167483	0.124326	0.134305	0.0990333	-0.0911602	0.109162	0.0727283	0.55478	-0.0912381	-0.183397	0.374876	0.213968	0.0187569	0.105851	0.114034	0.0741069	-0.0662917	0.0684831	-0.0622646	0.564124	-0.0925192	-0.253362	0.533654	0.21294	0.0353543	0.0968653	0.105311	0.0658593	-0.0606992	0.0537691
5	43	mitochondria	0.143026	-0.105951	0.196255	-0.139784	0.0676458	-0.227235	0.160946	0.215466	0.23387	-0.204365	0.322855	0.528362	0.385494	-0.151086	0.187099	-0.111734	0.149153	-0.252305	0.187238	0.262568	0.273291	-0.262215	0.373249	0.598608	0.423898	-0.16719	0.246923	-0.145259	0.106195	-0.277913	0.155095	0.267608	0.279514	-0.288851	0.407222	0.677689	0.406164	-0.189786	0.423485	-0.138465	0.169466	-0.332507	0.1812	0.287851	0.307233	-0.330026	0.472605
5	44	nucleoplasm and cytoplasm	0.222904	-0.0247616	-0.29333	0.505953	0.399801	0.204958	0.305655	0.108427	0.0255266	0.0909231	-0.107667	-0.440522	0.756301	0.0342919	-0.271613	0.539125	0.357083	0.306014	0.228049	0.0594459	-0.0353612	0.22028	-0.225851	-0.679338	0.756144	0.0580642	-0.299416	0.701205	0.304438	0.323079	0.185836	0.0334432	-0.0585565	0.25565	-0.250345	-0.87208	0.722412	0.0665994	-0.37645	0.845278	0.26734	0.30642	0.156872	0.0228298	-0.0619967	0.239817	-0.232601
5	45	nucleoli and cytoplasm	0.368081	-0.412607	-0.213586	0.471597	0.684497	-0.0273063	0.746084	0.462842	0.343215	-0.190473	0.106992	-0.358025	0.888556	-0.331356	-0.122596	0.419944	0.592839	-0.00436813	0.608517	0.413102	0.314178	-0.117252	0.0983066	-0.313146	0.799516	-0.31318	0.0223855	0.381828	0.565753	-0.0827598	0.561721	0.401971	0.334337	-0.166593	0.196856	-0.155308	0.707706	-0.319619	0.238836	0.295173	0.565721	-0.181931	0.548215	0.411803	0.368366	-0.238826	0.310525
5	47	structured cytoplasm	0.303087	-0.622298	0.200623	-0.664593	-0.354589	-0.71543	0.042316	0.595142	0.63111	-0.72306	0.711601	0.862933	0.186873	-0.667274	0.0569906	-0.445139	-0.340844	-0.63037	0.0515278	0.616198	0.615455	-0.727109	0.654299	0.796861	0.282299	-0.649776	-0.0568243	-0.219001	-0.360777	-0.528495	0.0266263	0.588624	0.564129	-0.661043	0.560298	0.648111	0.364053	-0.655724	-0.0847743	-0.00223361	-0.27577	-0.511883	0.0906954	0.604581	0.574864	-0.651784	0.54882
5	48	ER	0.105716	-0.101344	-0.0579547	0.0731901	-0.17467	-0.113975	0.0245756	0.145796	0.146637	-0.137015	0.163001	0.209436	0.276413	-0.0990547	0.03046	-0.0139442	-0.0948681	-0.137603	0.0501078	0.153835	0.159238	-0.160463	0.207065	0.343599	0.24084	-0.105972	0.17815	-0.188477	-0.0940266	-0.192831	0.0375819	0.157179	0.173401	-0.194446	0.267621	0.492398	0.186145	-0.13032	0.46842	-0.282413	0.00385366	-0.270859	0.0879212	0.184114	0.211958	-0.244607	0.350986
6	1	nucleoplasm	0.111751	0.60328	-0.365399	0.563528	0.105082	0.539164	-0.242848	-0.576584	-0.565609	0.570352	-0.544581	-0.561533	-0.236203	0.614254	-0.317677	0.583488	0.100213	0.562975	-0.259235	-0.586659	-0.581238	0.603873	-0.585338	-0.777152	-0.23825	0.613241	-0.298749	0.64945	0.0816195	0.56794	-0.267176	-0.584073	-0.579659	0.613516	-0.595513	-0.877223	-0.260294	0.610496	-0.263617	0.623947	0.044991	0.565447	-0.281157	-0.580693	-0.57594	0.612573	-0.591278
6	2	structured cytoplasm	0.195553	-0.250862	-0.289519	0.566076	0.940128	0.157218	0.885764	0.346725	0.214879	-0.00449849	-0.0832294	-0.614568	0.847581	-0.151274	-0.201395	0.565415	0.84526	0.142058	0.73299	0.265083	0.166459	0.0415856	-0.0610636	-0.611067	0.742144	-0.124263	-0.111019	0.618553	0.784626	0.0528424	0.668263	0.241388	0.179112	-0.0158617	0.0357285	-0.516613	0.648695	-0.126165	0.0082502	0.620345	0.737475	-0.0362631	0.627041	0.244279	0.206127	-0.0798023	0.13092
6	3	nucleoli and cytoplasm	0.22747	-0.0635408	-0.240355	0.421621	0.135785	0.0497087	0.284051	0.119904	0.0889916	-0.0218123	0.00519739	-0.24502	0.574658	0.0193501	-0.284492	0.541824	0.152498	0.198781	0.24313	0.0455633	-0.0102872	0.117506	-0.141788	-0.525797	0.577906	0.0445635	-0.308235	0.66109	0.122841	0.237183	0.211339	0.0210518	-0.0385529	0.163274	-0.178018	-0.693954	0.544192	0.0543212	-0.329397	0.724868	0.144689	0.224754	0.213421	0.01388	-0.0386009	0.161542	-0.16135
6	4	cytoskeleton	0.167661	-1.1425	0.195092	0.0196696	0.304455	-0.968653	0.998582	1.17032	1.13215	-1.0815	0.979496	0.501301	1.05331	-1.03994	0.110403	0.0716249	0.29878	-0.751649	0.909723	1.08791	1.01211	-0.909513	0.815117	0.370605	1.04506	-1.00964	0.14495	0.123126	0.304616	-0.729955	0.873428	1.0616	0.986505	-0.877385	0.807356	0.309901	1.02437	-1.01128	0.192044	0.181298	0.274069	-0.775138	0.833453	1.05839	0.995684	-0.90764	0.854437
6	5	cytoskeleton	0.403634	-1.08172	0.675055	-0.820298	0.375195	-1.12871	0.805643	1.06159	1.08775	-1.16113	1.15707	0.994498	0.682653	-1.14876	0.668341	-0.74987	0.491888	-1.14377	0.880964	1.08704	1.10572	-1.18712	1.15614	0.912021	0.713221	-1.14237	0.580133	-0.571827	0.475652	-1.09285	0.838479	1.05295	1.06087	-1.14679	1.09799	0.867361	0.742822	-1.14392	0.498698	-0.254776	0.451351	-1.0647	0.80587	1.03231	1.03632	-1.13019	1.06527
6	6	nucleoplasm	0.3261	1.03676	-0.463047	0.630059	-0.570704	0.843344	-0.888793	-1.12138	-1.05804	0.964596	-0.990613	-0.995429	-1.65318	1.0061	-0.414045	0.613909	-0.589733	0.796215	-0.855801	-1.0856	-1.02241	0.927904	-0.960038	-1.07087	-1.65227	0.993358	-0.447285	0.630991	-0.602166	0.805085	-0.840907	-1.07036	-1.01352	0.932179	-0.982744	-1.12348	-1.63603	0.993891	-0.495039	0.53485	-0.610254	0.833308	-0.831835	-1.06903	-1.0192	0.954859	-1.025
6	7	structured cytoplasm	0.70876	-1.62247	2.46252	-2.2674	0.493439	-2.08444	1.15062	1.62879	1.78381	-1.86184	2.00944	1.82122	0.396289	-1.79017	2.16881	-1.98058	0.80704	-2.25685	1.47908	1.81565	1.96379	-2.03465	2.14668	1.84154	0.612262	-1.85109	1.83102	-1.54305	0.811004	-2.23124	1.50075	1.86215	1.97741	-2.05746	2.09689	1.72784	0.814428	-1.86076	1.58617	-0.878392	0.839948	-2.17072	1.52142	1.86734	1.95395	-2.02851	2.01012
6	8	ER	0.0711673	0.40894	-0.395961	0.562734	-0.136806	0.559187	-0.221965	-0.397945	-0.447928	0.542542	-0.577342	-0.857496	-0.0882649	0.433946	-0.331793	0.520164	-0.259033	0.486915	-0.295825	-0.415697	-0.438074	0.500768	-0.507118	-0.755106	-0.181991	0.433467	-0.303087	0.494568	-0.28129	0.428952	-0.306184	-0.411423	-0.417599	0.452991	-0.446031	-0.644682	-0.247745	0.427149	-0.265575	0.396243	-0.289064	0.388828	-0.310565	-0.403736	-0.401214	0.42102	-0.403105
6	9	plasma membrane	0.455152	-0.563427	1.24706	-1.41634	0.155104	-0.787022	0.292462	0.520674	0.579214	-0.67396	0.739791	0.680076	-0.0986246	-0.698313	1.30361	-1.55472	0.202337	-0.943783	0.431395	0.632758	0.715252	-0.793545	0.842419	0.599642	0.0218198	-0.747144	1.13541	-1.39182	0.166002	-0.974459	0.451819	0.66933	0.751996	-0.822443	0.841339	0.529958	0.137863	-0.756254	0.892876	-0.953624	0.110019	-0.954782	0.438076	0.670466	0.74335	-0.812684	0.798356
6	10	nucleoplasm	0.130777	0.826251	-0.44274	0.591017	-0.339323	0.754511	-0.661113	-0.873319	-0.851221	0.817412	-0.843767	-0.939177	-0.817673	0.826294	-0.383444	0.570605	-0.401686	0.702658	-0.663735	-0.869112	-0.835262	0.78737	-0.799977	-0.844244	-0.900725	0.827681	-0.389075	0.573384	-0.426819	0.700311	-0.661334	-0.864937	-0.8299	0.787602	-0.801999	-0.787424	-0.940323	0.835553	-0.414834	0.520398	-0.441581	0.717492	-0.659975	-0.867303	-0.835041	0.804834	-0.82431
6	11	ER	0.186052	-0.615069	0.449485	-0.656415	-0.258181	-0.759893	0.146647	0.619227	0.66356	-0.697817	0.721873	0.796836	0.338468	-0.644356	0.270084	-0.493867	-0.2462	-0.730909	0.171377	0.630961	0.660624	-0.69888	0.682425	0.745321	0.417798	-0.624777	0.1563	-0.333911	-0.261576	-0.67108	0.149042	0.60127	0.617974	-0.659119	0.619833	0.658253	0.469254	-0.62565	0.166113	-0.119197	-0.205082	-0.683913	0.207675	0.614468	0.632299	-0.660614	0.625736
6	12	nucleoplasm and cytoplasm	0.221986	0.591943	-0.272482	0.282155	-0.129138	0.471185	-0.402802	-0.565292	-0.537645	0.523751	-0.457335	-0.0573807	-0.308462	0.601522	-0.30246	0.461291	-0.0820249	0.514268	-0.38921	-0.578171	-0.562752	0.554767	-0.51837	-0.374625	-0.228128	0.609192	-0.349396	0.650133	-0.0215279	0.551936	-0.367986	-0.583326	-0.577017	0.589845	-0.570154	-0.660324	-0.185792	0.620546	-0.434459	0.78269	-0.0118875	0.584757	-0.363796	-0.592594	-0.591459	0.621206	-0.613807
6	13	ERGIC	0.387811	-0.0540666	-0.135715	0.282322	0.139748	0.0102954	0.160998	0.10055	0.0728529	-0.032181	0.0396149	-0.0800124	0.46163	-0.0204241	-0.14124	0.347934	0.177259	0.0782961	0.142307	0.0714313	0.0360717	0.0371267	-0.035323	-0.28206	0.483134	-0.00415101	-0.143355	0.462797	0.259429	0.0916446	0.169595	0.0605002	0.025925	0.0549904	-0.0484511	-0.392449	0.471266	0.00164725	-0.163579	0.571135	0.292663	0.0925368	0.174945	0.0566038	0.0247511	0.0562269	-0.0477718
6	14	ER	0.0677553	0.173386	-0.352719	0.518652	0.0516483	0.393059	0.000640419	-0.104465	-0.185999	0.314793	-0.321769	-0.582735	0.633105	0.209384	-0.257236	0.426416	-0.0258413	0.310633	-0.0706475	-0.131985	-0.177216	0.273394	-0.234768	-0.365329	0.496439	0.210473	-0.171108	0.329763	-0.0535922	0.2331	-0.093105	-0.131759	-0.154427	0.216845	-0.146589	-0.145529	0.380683	0.198686	-0.0667194	0.219509	-0.062312	0.17266	-0.104533	-0.12066	-0.130471	0.169819	-0.0745453
6	15	ER	0.192307	0.512751	-0.402975	0.58299	-0.0491695	0.596584	-0.26423	-0.469477	-0.508652	0.592636	-0.596555	-0.864374	0.194529	0.526831	-0.333271	0.535661	-0.148097	0.513924	-0.318501	-0.481441	-0.492291	0.540156	-0.512322	-0.683271	0.0734484	0.524636	-0.310897	0.520577	-0.168105	0.470754	-0.327518	-0.477945	-0.476516	0.505572	-0.462875	-0.555749	-0.0133279	0.52123	-0.297271	0.465448	-0.174357	0.450394	-0.330719	-0.474007	-0.468102	0.489686	-0.437946
6	16	structured cytoplasm	0.385913	-0.0515399	0.296697	-0.555229	-0.107445	-0.223102	-0.0262586	0.138925	0.170285	-0.17706	0.314637	0.804551	0.0885144	-0.159601	0.116276	-0.275623	-0.0533658	-0.254002	0.00637512	0.21505	0.222023	-0.277927	0.357805	0.726027	0.213931	-0.198799	0.0374522	-0.0397297	-0.046914	-0.24269	0.00225515	0.227797	0.22268	-0.298473	0.344639	0.622001	0.283533	-0.2095	-0.0240988	0.178152	-0.0330069	-0.229158	0.0021156	0.222982	0.216092	-0.296495	0.327009
6	17	nucleoli	0.136425	1.05418	-0.427689	0.495541	-0.658948	0.850467	-0.952568	-1.15015	-1.08249	0.985879	-1.01087	-0.82391	-1.9527	1.01481	-0.320779	0.106209	-0.727003	0.783027	-0.924418	-1.0988	-1.02888	0.929592	-0.949925	-0.391942	-1.98077	0.995986	-0.25415	-0.541589	-0.747393	0.786665	-0.908431	-1.07418	-1.01098	0.926933	-0.961082	-0.172522	-1.95383	0.992043	-0.160171	-1.36555	-0.762965	0.812137	-0.89929	-1.06686	-1.01247	0.944789	-0.995746
6	18	nucleoli	0.204764	0.540524	-0.452219	0.167657	-0.969296	0.587616	-0.969532	-0.691996	-0.681972	0.543305	-0.628359	0.0786458	-1.0574	0.633486	-0.417007	-0.0136777	-0.976936	0.608465	-0.940349	-0.761331	-0.741071	0.606711	-0.675297	0.109963	-1.10949	0.71271	-0.473394	-0.158825	-0.967034	0.660738	-0.924971	-0.810887	-0.788609	0.688641	-0.745828	0.0359547	-1.12711	0.77305	-0.553601	-0.525189	-0.961782	0.717285	-0.91591	-0.85118	-0.830124	0.76231	-0.820172
6	19	nucleoli	0.251982	0.951225	-0.46407	0.419208	-0.943619	0.809745	-1.04887	-1.08427	-1.0269	0.899042	-0.959151	-0.594681	-2.08319	0.965043	-0.413892	0.0988476	-0.962362	0.782488	-1.00724	-1.07459	-1.01304	0.898672	-0.950532	-0.358056	-2.08366	0.977211	-0.446377	-0.515426	-0.958162	0.80854	-0.985656	-1.07587	-1.01962	0.930531	-0.997832	-0.31127	-2.05221	0.984426	-0.509284	-1.26667	-0.956646	0.843351	-0.971862	-1.07839	-1.02956	0.960481	-1.04885
6	20	ER	0.141205	-0.200037	0.0983411	-0.750924	-0.455139	-0.233849	-0.263542	0.226422	0.240705	-0.275544	0.350718	0.910934	0.301156	-0.230744	-0.0200435	-0.403492	-0.381857	-0.181423	-0.208122	0.247079	0.232435	-0.277865	0.314889	0.787572	0.425628	-0.220664	-0.127177	-0.203115	-0.414316	-0.118889	-0.224131	0.229245	0.198316	-0.240896	0.253331	0.588998	0.514239	-0.222665	-0.161424	-0.0186396	-0.365047	-0.121126	-0.181059	0.240679	0.209131	-0.248599	0.264899
6	21	nucleoplasm	0.284741	0.727302	-0.369073	0.64375	1.71886	0.719381	0.11049	-0.717911	-0.721648	0.775373	-0.779084	-1.09606	-0.299535	0.731028	-0.249697	0.632029	1.31937	0.652683	-0.0205896	-0.72241	-0.707838	0.736724	-0.709956	-0.986541	-0.412463	0.722351	-0.113797	0.675636	1.16092	0.627883	-0.0632693	-0.70835	-0.688207	0.713505	-0.677763	-0.913118	-0.461606	0.722009	0.0980521	0.63163	1.0616	0.624484	-0.0892419	-0.704746	-0.684378	0.712368	-0.670057
6	22	uniform cytoplasm	0.603354	0.225041	-0.29953	0.508575	0.378437	0.326136	0.113197	-0.147044	-0.18843	0.281238	-0.250651	-0.412572	0.538222	0.276637	-0.271873	0.541266	0.350325	0.376268	0.057846	-0.198737	-0.240368	0.34654	-0.314863	-0.596611	0.514501	0.286903	-0.272661	0.644082	0.333297	0.367393	0.0375216	-0.209428	-0.243612	0.346944	-0.305429	-0.664987	0.466236	0.288748	-0.277901	0.678961	0.294935	0.347256	0.0159984	-0.212081	-0.239332	0.331295	-0.279222
6	23	vesicles	0.386865	-0.00105014	-0.233148	0.302329	-0.045435	0.0971884	0.0755784	0.0775796	0.0342612	0.0256504	0.000909647	-0.0381183	0.578175	0.0293378	-0.173754	0.251993	-0.0792028	0.0913136	0.0222549	0.0546004	0.027292	0.0356144	0.010435	0.0110864	0.531393	0.0352486	-0.1001	0.184296	-0.0881063	0.0463992	0.00631851	0.0478755	0.0352249	0.0107969	0.0611208	0.0978432	0.467453	0.0305553	-0.0479239	0.158998	-0.115476	0.00950302	-0.0147184	0.0484785	0.0440548	-0.0147721	0.103055
6	24	mitochondria	0.158482	0.551899	-0.26303	0.512499	0.732044	0.53885	-0.0256957	-0.482659	-0.49981	0.565049	-0.512867	-0.530117	0.0906969	0.537138	-0.0450516	0.27855	0.450534	0.390878	-0.141423	-0.460483	-0.440251	0.46342	-0.348427	-0.00514001	-0.10109	0.51675	0.200008	0.0205049	0.338245	0.335169	-0.180292	-0.437471	-0.405622	0.421042	-0.279032	0.321615	-0.202976	0.492239	0.484129	-0.224122	0.261565	0.300981	-0.20374	-0.413149	-0.3803	0.391574	-0.230859
6	25	cytoskeleton	0.387755	-1.04309	0.176492	-0.363905	-0.128259	-0.675927	0.400349	0.938902	0.870152	-0.817818	0.715276	0.46802	0.900535	-0.958474	0.145641	-0.408783	-0.104754	-0.606254	0.383647	0.862368	0.804488	-0.730426	0.658463	0.419712	0.880607	-0.934995	0.172978	-0.426263	-0.0403374	-0.618043	0.411956	0.841968	0.79389	-0.731544	0.677666	0.426968	0.874919	-0.931624	0.211465	-0.337996	-0.0568338	-0.636898	0.395279	0.83782	0.795172	-0.747279	0.703749
6	26	nucleoplasm	0.609111	0.514798	-0.181568	0.128339	-0.261336	0.361753	-0.378169	-0.459753	-0.427033	0.424115	-0.323065	0.19537	-0.204373	0.490793	-0.227416	0.275067	-0.245641	0.375429	-0.367902	-0.437647	-0.419887	0.411254	-0.335086	0.0716189	-0.12381	0.480535	-0.249128	0.375272	-0.234381	0.388436	-0.361642	-0.429627	-0.419065	0.417378	-0.349961	-0.00103483	-0.108595	0.474991	-0.247038	0.408674	-0.198817	0.389643	-0.34715	-0.423886	-0.414546	0.417714	-0.348075
6	27	nucleoli	0.139549	0.519493	-0.439923	0.439343	-0.79362	0.605095	-0.716327	-0.535578	-0.562312	0.602395	-0.612718	-0.642407	-0.0533078	0.539951	-0.3936	0.32612	-0.806331	0.582873	-0.70207	-0.553329	-0.565002	0.610927	-0.60754	-0.620346	-0.125982	0.539146	-0.421747	0.163842	-0.79433	0.566194	-0.685711	-0.551172	-0.557158	0.595972	-0.589961	-0.588526	-0.18056	0.537729	-0.454313	-0.101353	-0.78156	0.553677	-0.672339	-0.547883	-0.550887	0.579422	-0.569315
6	28	structured cytoplasm	0.496864	0.052713	-0.175074	0.437736	0.60906	0.11232	0.386305	0.0328044	0.00771863	0.0641775	-0.0337103	-0.203495	0.447636	0.11276	-0.217956	0.521405	0.581563	0.228032	0.313269	-0.0234791	-0.0686745	0.17198	-0.157243	-0.488597	0.468904	0.132207	-0.221933	0.643797	0.553145	0.252821	0.282252	-0.043975	-0.0909583	0.203966	-0.183668	-0.652144	0.446601	0.137827	-0.252485	0.788937	0.546549	0.236875	0.268066	-0.0494681	-0.0890879	0.19469	-0.166509
6	29	nucleoplasm and cytoplasm	0.273276	-1.02733	2.38923	-2.27577	0.320414	-1.52414	0.697598	1.04917	1.1751	-1.27126	1.48037	1.55484	-0.121404	-1.28821	2.31475	-2.38598	0.456277	-1.81441	0.918537	1.26958	1.42256	-1.54763	1.71316	1.55887	0.0822052	-1.41315	2.34348	-2.08667	0.57577	-1.93201	1.06745	1.3848	1.54033	-1.66054	1.78952	1.47154	0.303802	-1.44872	2.08098	-1.38031	0.570415	-1.936	1.09088	1.40946	1.5497	-1.67241	1.74663
6	30	mitochondria	0.42067	0.596014	-0.441073	0.541768	-0.638927	0.664611	-0.629886	-0.583842	-0.614393	0.679159	-0.6816	-0.871588	0.075954	0.600522	-0.390848	0.491519	-0.658365	0.587235	-0.623406	-0.582839	-0.59005	0.618478	-0.605069	-0.7101	-0.0234784	0.596556	-0.420151	0.458093	-0.671205	0.557161	-0.623637	-0.580151	-0.580708	0.589066	-0.572479	-0.597463	-0.115155	0.599956	-0.506639	0.504943	-0.679493	0.554071	-0.624184	-0.584716	-0.583735	0.586977	-0.574356
6	31	cytoskeleton	0.314941	-0.0190586	-0.240693	0.382637	0.0508043	0.0966059	0.113198	0.0399009	0.0107787	0.0467852	-0.0703612	-0.171094	0.387767	0.0536767	-0.23294	0.454988	0.119595	0.186043	0.100654	-0.020144	-0.0555163	0.140367	-0.155896	-0.370143	0.37334	0.0693283	-0.199156	0.51528	0.158228	0.193138	0.098715	-0.0330145	-0.0654942	0.155769	-0.159426	-0.489309	0.353006	0.0782565	-0.23383	0.589978	0.102456	0.192222	0.0608632	-0.0467251	-0.075413	0.159615	-0.162742
6	32	focal	0.326339	-0.520681	0.121039	-0.348278	0.0873272	-0.526915	0.355654	0.586169	0.580662	-0.593859	0.645613	0.794626	0.671924	-0.52841	0.00524065	-0.246315	0.0281254	-0.403574	0.281744	0.567611	0.533247	-0.554855	0.558868	0.685839	0.733303	-0.522988	0.0641376	-0.215836	0.182947	-0.369419	0.339649	0.563538	0.523807	-0.53102	0.548492	0.612049	0.771943	-0.5086	0.103846	-0.136721	0.211034	-0.330485	0.335812	0.543475	0.502744	-0.497489	0.522262
6	33	nucleoli	0.108249	0.862167	-0.447368	0.526478	-0.725455	0.747562	-0.81729	-0.890936	-0.860391	0.82542	-0.822383	-0.793635	-0.763802	0.845892	-0.406447	0.498917	-0.748237	0.703456	-0.795075	-0.872244	-0.835131	0.797663	-0.795342	-0.78727	-0.794017	0.838011	-0.435502	0.418766	-0.745126	0.695903	-0.779978	-0.863615	-0.826348	0.791361	-0.794414	-0.724033	-0.839478	0.837341	-0.486308	0.268855	-0.748954	0.705635	-0.773193	-0.862023	-0.827518	0.799732	-0.809347
6	34	uniform cytoplasm	0.71069	-1.98609	0.22739	0.210042	1.26627	-1.47969	2.42547	2.03599	1.90895	-1.70087	1.41574	0.392478	1.52268	-1.73985	0.137634	0.300736	1.2774	-1.06678	2.22933	1.85796	1.67338	-1.32561	1.11255	0.142849	1.48577	-1.65211	0.199884	0.401293	1.23224	-1.01123	2.11309	1.78471	1.60698	-1.24568	1.09403	0.0433596	1.44266	-1.63129	0.325945	0.470833	1.20528	-1.08834	2.05357	1.7675	1.61933	-1.28397	1.17486
6	35	uniform cytoplasm	0.186601	0.11991	-0.095291	0.0350302	0.0419248	0.0459928	-0.00177586	-0.0489537	-0.0358191	0.0448932	0.03587	0.304529	0.263327	0.134923	-0.188431	0.242216	0.0686822	0.14421	-0.0125073	-0.0742062	-0.0873714	0.0972244	-0.0593683	0.0373216	0.353175	0.147922	-0.230063	0.437063	0.130868	0.196742	0.00374053	-0.0876729	-0.114255	0.139952	-0.115023	-0.184901	0.391468	0.156052	-0.303325	0.605722	0.136402	0.221895	-0.00203276	-0.098158	-0.128431	0.161133	-0.143796
6	36	ER	0.134798	0.65894	-0.418142	0.569019	-0.310695	0.655939	-0.48443	-0.64262	-0.652887	0.68485	-0.686654	-0.842712	-0.22986	0.657584	-0.347216	0.500776	-0.361263	0.576437	-0.500911	-0.636904	-0.625583	0.631611	-0.607996	-0.632463	-0.331156	0.65252	-0.33103	0.450591	-0.374248	0.543528	-0.501543	-0.630856	-0.610682	0.607338	-0.574909	-0.475995	-0.410316	0.647802	-0.338025	0.382636	-0.390447	0.533612	-0.504597	-0.625392	-0.603666	0.600367	-0.564734
6	37	nucleoli	0.43469	1.08173	-0.446719	0.455705	-0.861526	0.86314	-1.03425	-1.18855	-1.11485	1.00077	-1.03475	-0.740107	-2.21465	1.03999	-0.360579	-0.0283626	-0.895954	0.800991	-0.9927	-1.13621	-1.06169	0.948727	-0.98231	-0.282995	-2.23292	1.02191	-0.334372	-0.847592	-0.900181	0.809214	-0.971438	-1.11389	-1.04729	0.95081	-1.00285	-0.0762297	-2.20469	1.01774	-0.30281	-1.81906	-0.905554	0.837491	-0.959018	-1.10674	-1.04949	0.970948	-1.04323
6	38	mitochondria	0.257888	0.667673	-0.424632	0.465514	-0.676764	0.658367	-0.684952	-0.67219	-0.678804	0.696617	-0.68837	-0.657836	-0.315167	0.649698	-0.345179	0.220187	-0.714155	0.554788	-0.683176	-0.646857	-0.627469	0.613642	-0.581513	-0.252145	-0.444743	0.634491	-0.308907	-0.0842517	-0.684035	0.510972	-0.657509	-0.628271	-0.602005	0.576057	-0.531899	0.031447	-0.532242	0.624508	-0.294963	-0.390062	-0.691661	0.498807	-0.656255	-0.619447	-0.593754	0.564389	-0.516445
6	39	Golgi	0.815337	0.573215	-0.407912	0.299058	-0.718877	0.553523	-0.743435	-0.598588	-0.594302	0.564106	-0.561373	-0.225785	-0.378462	0.573271	-0.380343	0.288561	-0.72775	0.553662	-0.725781	-0.599844	-0.596062	0.57404	-0.575319	-0.255677	-0.384166	0.569318	-0.414499	0.215786	-0.715504	0.552662	-0.711985	-0.596948	-0.59313	0.571829	-0.578024	-0.214086	-0.417472	0.564462	-0.454527	0.0977892	-0.668982	0.547972	-0.686117	-0.589952	-0.585691	0.563799	-0.569957
6	40	nucleoli	0.078996	0.490336	-0.436958	0.00830099	-0.959087	0.522974	-0.991662	-0.783227	-0.736829	0.50682	-0.666443	0.0585293	-1.86671	0.551497	-0.393648	-0.280737	-0.966202	0.58651	-0.95449	-0.817268	-0.781449	0.60215	-0.728515	0.352399	-1.82878	0.598436	-0.418925	-0.957359	-0.961015	0.650003	-0.937067	-0.839781	-0.813592	0.683463	-0.800748	0.519413	-1.79047	0.640482	-0.448918	-1.78167	-0.953984	0.716736	-0.926576	-0.865186	-0.84716	0.761549	-0.877154
6	41	Golgi	0.125672	-0.0692749	-0.0380287	-0.0567938	-0.236785	-0.123181	-0.0900897	0.143545	0.143594	-0.137822	0.204622	0.432805	0.348988	-0.0926427	-0.0914856	0.0348078	-0.242925	-0.0885479	-0.105695	0.156861	0.141899	-0.14541	0.185313	0.385687	0.398485	-0.100393	-0.0844309	0.064432	-0.233102	-0.098421	-0.106178	0.159364	0.14475	-0.155447	0.20013	0.396595	0.393915	-0.109187	-0.0498762	0.062527	-0.222645	-0.124724	-0.10517	0.162891	0.154174	-0.176682	0.234785
6	42	nucleoplasm and cytoplasm	0.306414	-0.852304	0.283615	-0.0256732	0.674846	-0.876573	1.11223	0.925663	0.946724	-0.898152	0.881856	0.597564	0.715884	-0.776777	0.252841	0.185462	1.17815	-0.708463	1.35168	0.903098	0.880923	-0.786235	0.774369	0.410539	0.768789	-0.740866	0.274912	0.370998	1.24325	-0.631324	1.34995	0.87825	0.83551	-0.720814	0.720151	0.257544	0.784011	-0.726633	0.274535	0.526198	1.20252	-0.619258	1.29637	0.859664	0.815752	-0.705069	0.708819
6	43	mitochondria	0.398813	0.413569	-0.0926456	0.124488	-0.407251	0.292487	-0.428118	-0.394989	-0.36657	0.347773	-0.295529	-0.0906353	-0.390329	0.377916	-0.0967523	0.127063	-0.389828	0.259303	-0.399672	-0.357474	-0.332866	0.30695	-0.265246	-0.0679627	-0.37366	0.362164	-0.11596	0.0911612	-0.408531	0.247457	-0.404671	-0.346882	-0.324566	0.291742	-0.257262	-0.021918	-0.386854	0.349585	-0.116877	0.107604	-0.401554	0.23443	-0.397094	-0.336877	-0.314636	0.2784	-0.245096
6	44	nucleoplasm and cytoplasm	0.061751	-0.391581	-0.0890636	0.451562	1.18205	-0.225948	1.11286	0.510034	0.451688	-0.330184	0.297548	-0.154103	0.779007	-0.288686	-0.112103	0.539116	1.30937	-0.043924	1.06348	0.431155	0.342856	-0.153153	0.129085	-0.445122	0.776281	-0.255541	-0.0963374	0.676275	1.2921	-0.00565211	1.01462	0.40248	0.312244	-0.10356	0.0988906	-0.613481	0.748329	-0.247044	-0.0750878	0.790278	1.33071	-0.0310399	1.00663	0.397114	0.317832	-0.115218	0.125881
6	45	nucleoli and cytoplasm	0.338628	-0.207465	-0.228574	0.363968	0.111905	-0.0320943	0.308771	0.28886	0.229597	-0.148507	0.137369	-0.0936425	0.793898	-0.133517	-0.213225	0.421877	0.191111	0.0737333	0.287928	0.227473	0.160797	-0.0355547	0.0363445	-0.264772	0.782315	-0.11037	-0.187219	0.463129	0.151157	0.0710512	0.246763	0.202756	0.146672	-0.0206302	0.0449978	-0.31277	0.731963	-0.105486	-0.141115	0.470453	0.182126	0.0216459	0.252583	0.20061	0.161264	-0.0539641	0.102208
6	47	structured cytoplasm	0.175699	-0.237115	0.283749	-0.434579	-0.298346	-0.368755	-0.0682534	0.26262	0.292907	-0.334209	0.386887	0.596247	0.146043	-0.324434	0.156067	-0.200904	-0.231728	-0.39287	-0.0159714	0.332557	0.341866	-0.400414	0.406605	0.501308	0.255881	-0.34255	0.0478738	0.0364738	-0.210029	-0.35677	-0.00705105	0.337662	0.333133	-0.385218	0.360081	0.336739	0.329429	-0.340001	-0.0648423	0.254267	-0.200062	-0.306207	-0.0132766	0.323683	0.310197	-0.35395	0.304142
6	48	ER	0.0965745	-0.0504909	-0.184665	0.274714	-0.0154781	0.0234496	0.116502	0.119945	0.0828071	-0.0363082	0.0553754	0.00636023	0.472427	-0.0385744	-0.107872	0.137886	-0.0455617	-0.00135883	0.0658575	0.11748	0.0922913	-0.0515343	0.0913393	0.165232	0.409957	-0.0469406	0.0328442	-0.0340314	-0.0307435	-0.0862537	0.0614805	0.127621	0.120766	-0.107119	0.186262	0.399781	0.323928	-0.0662619	0.201585	-0.166356	-0.0274976	-0.164269	0.0557587	0.144033	0.149423	-0.161607	0.27185
7	1	nucleoplasm	0.41801	0.255924	-0.334269	0.0396815	-0.666049	0.208192	-0.739584	-0.449436	-0.408597	0.200728	-0.307301	-0.0507072	-1.10247	0.244306	-0.344045	0.105036	-0.704196	0.259921	-0.742723	-0.475865	-0.443492	0.222033	-0.361925	-0.0769232	-1.09031	0.255971	-0.406463	0.219196	-0.701133	0.331796	-0.735884	-0.491549	-0.474389	0.27868	-0.436978	-0.157232	-1.01865	0.276451	-0.49136	0.30393	-0.704116	0.410594	-0.731174	-0.5082	-0.506045	0.348034	-0.519117
7	2	structured cytoplasm	0.0926041	0.000524352	-0.322323	0.604208	1.5357	0.398667	0.836674	0.123162	-0.0147312	0.28315	-0.329471	-0.857108	0.947886	0.0778253	-0.222618	0.590147	1.15355	0.319219	0.591868	0.0454346	-0.0447197	0.261482	-0.232174	-0.728147	0.786877	0.0910277	-0.0966198	0.616891	1.01183	0.225041	0.510253	0.0349987	-0.0196059	0.186156	-0.117112	-0.566111	0.673252	0.086574	0.0553582	0.601087	0.920022	0.147658	0.459161	0.0399088	0.00516623	0.124149	-0.0230782
7	3	nucleoli and cytoplasm	0.295904	0.265908	-0.353132	0.522584	0.102335	0.370983	0.026238	-0.192607	-0.232915	0.314133	-0.299751	-0.520488	0.589999	0.32238	-0.336466	0.587132	0.0506297	0.424262	-0.0318588	-0.253382	-0.293389	0.388725	-0.373565	-0.743302	0.556177	0.339973	-0.368436	0.733396	0.0367406	0.418918	-0.0474607	-0.272014	-0.304209	0.393395	-0.370238	-0.854583	0.503806	0.348066	-0.403946	0.808468	0.0499912	0.405667	-0.0468171	-0.279454	-0.304603	0.384643	-0.35259
7	4	cytoskeleton	0.271725	-0.237912	0.357629	-0.479006	-0.00624437	-0.406679	0.133752	0.324118	0.367272	-0.364834	0.484315	0.773472	0.320963	-0.295262	0.157072	-0.175117	0.0695966	-0.372254	0.167462	0.364874	0.375103	-0.40256	0.465052	0.68679	0.426272	-0.307823	0.114704	0.0201855	0.0989614	-0.343663	0.185717	0.371751	0.367295	-0.397227	0.44353	0.582229	0.481705	-0.315549	0.142251	0.247693	0.256536	-0.350451	0.266793	0.38704	0.382574	-0.405102	0.455941
7	5	cytoskeleton	0.185442	-1.04798	0.176372	0.117313	0.748458	-0.782165	1.26883	1.10449	1.03938	-0.920793	0.821263	0.254342	1.07383	-0.918832	0.134139	0.197259	0.801409	-0.56741	1.19262	1.00314	0.911907	-0.716617	0.650373	0.0538065	1.06781	-0.879202	0.174909	0.288111	0.799435	-0.543363	1.14767	0.96836	0.882421	-0.678722	0.642919	-0.0400496	1.04749	-0.868456	0.227213	0.390856	0.799008	-0.573596	1.12111	0.958434	0.884076	-0.695947	0.676963
7	6	nucleoplasm	0.756379	-0.397654	-0.332675	0.578653	0.813768	0.204534	0.791396	0.477858	0.299461	0.00883756	-0.0956584	-0.710762	1.26038	-0.266034	-0.240524	0.568972	0.779693	0.235049	0.665024	0.356356	0.213039	0.115542	-0.123918	-0.751171	1.12931	-0.241687	-0.106433	0.594648	0.836428	0.140115	0.668363	0.347377	0.238743	0.039542	-0.000137221	-0.644242	1.02806	-0.24331	0.0982678	0.542126	0.849705	0.0413309	0.651742	0.35379	0.271966	-0.0448043	0.125296
7	7	structured cytoplasm	0.111972	-0.588063	0.61669	-0.472919	0.536755	-0.763276	0.700991	0.684459	0.733424	-0.718037	0.828723	0.853006	0.476863	-0.632961	0.377072	-0.217367	0.758824	-0.70441	0.768287	0.711827	0.72606	-0.736422	0.790421	0.721399	0.577095	-0.63662	0.27981	0.0309685	0.772422	-0.644601	0.752318	0.701723	0.694018	-0.710567	0.734519	0.574458	0.633661	-0.635193	0.234022	0.302785	0.821343	-0.612225	0.755438	0.691221	0.675985	-0.692414	0.702292
7	8	ER	0.200092	0.35246	-0.218197	0.11222	-0.44079	0.284046	-0.428142	-0.320509	-0.318055	0.309446	-0.258467	-0.00447675	-0.0553922	0.313451	-0.213725	0.0607532	-0.451933	0.247232	-0.433942	-0.298695	-0.291056	0.258832	-0.223403	0.0643161	-0.0661332	0.293815	-0.183416	-0.0437274	-0.428024	0.21423	-0.415146	-0.28183	-0.26841	0.227936	-0.185278	0.184941	-0.0960415	0.278336	-0.144994	-0.122117	-0.407448	0.193165	-0.399264	-0.267306	-0.250867	0.209875	-0.157761
7	9	plasma membrane	0.0765382	-0.0573108	-0.274251	0.448446	0.227902	0.162368	0.233833	0.104166	0.0402051	0.0550295	-0.0749474	-0.329718	0.710975	0.0271568	-0.2647	0.494627	0.204646	0.276244	0.173286	0.0279601	-0.047466	0.194926	-0.198409	-0.571756	0.691526	0.0481698	-0.242063	0.544314	0.217339	0.278776	0.160894	0.0109775	-0.0562641	0.211235	-0.197236	-0.648698	0.641562	0.0528371	-0.268112	0.632233	0.164151	0.258534	0.128204	0.00477115	-0.0521716	0.196638	-0.172293
7	10	nucleoplasm	0.124816	0.997541	-0.458751	0.627008	-0.542759	0.831876	-0.838715	-1.06505	-1.01307	0.941964	-0.966419	-1.07925	-1.37501	0.970657	-0.403059	0.590119	-0.586226	0.774719	-0.817085	-1.03442	-0.977273	0.898573	-0.919863	-0.980823	-1.4246	0.959003	-0.437411	0.607987	-0.598976	0.778024	-0.804516	-1.02056	-0.9671	0.899526	-0.934693	-0.947187	-1.43366	0.958125	-0.480432	0.507711	-0.608102	0.801052	-0.797037	-1.01764	-0.97052	0.917265	-0.967782
7	11	ER	0.557972	-1.47629	2.06124	-1.95202	0.200698	-1.92427	0.922194	1.50392	1.6325	-1.69887	1.84608	1.59139	0.473758	-1.60443	1.64628	-1.96782	0.14975	-2.02723	0.982442	1.5994	1.7352	-1.80872	1.89266	1.60146	0.627911	-1.63659	1.46761	-1.7797	0.119509	-2.02981	0.995211	1.62178	1.74698	-1.82356	1.86882	1.57034	0.781604	-1.63606	1.31099	-1.30463	0.080645	-1.99707	0.981094	1.61356	1.72592	-1.80547	1.81821
7	12	nucleoplasm and cytoplasm	0.186573	-0.19744	-0.130487	0.261128	0.223959	-0.0784613	0.301955	0.263634	0.231412	-0.167683	0.191208	0.110011	0.747756	-0.116199	-0.199903	0.42919	0.308789	0.0926237	0.28542	0.191487	0.126812	-0.0118469	0.0223166	-0.233269	0.801719	-0.0891649	-0.250834	0.62122	0.326186	0.162342	0.269541	0.164657	0.0869568	0.060914	-0.050799	-0.515756	0.817921	-0.0800681	-0.281802	0.750564	0.374328	0.17601	0.284297	0.159118	0.0820261	0.0781901	-0.0619427
7	13	ERGIC	0.146308	-0.473898	-0.0333309	0.313923	0.736046	-0.326154	0.840594	0.605842	0.550199	-0.446523	0.466583	0.123102	1.0431	-0.395176	-0.0572788	0.369193	0.733747	-0.172227	0.749938	0.539805	0.460758	-0.313856	0.333577	-0.0687192	1.04602	-0.370101	0.00979056	0.429731	0.696924	-0.173694	0.698322	0.515419	0.444343	-0.295125	0.346841	-0.100693	0.994784	-0.37303	0.098375	0.473791	0.67143	-0.23022	0.665442	0.516214	0.461185	-0.33148	0.412014
7	14	ER	0.0526088	0.451369	-0.349439	0.496716	-0.0989704	0.472919	-0.23757	-0.400521	-0.421283	0.465658	-0.439206	-0.509077	0.140906	0.461878	-0.282465	0.456175	-0.133124	0.436193	-0.266422	-0.406264	-0.413402	0.452045	-0.408868	-0.456278	0.0792871	0.460096	-0.23482	0.410324	-0.163277	0.398437	-0.281592	-0.404901	-0.400982	0.427336	-0.367679	-0.336695	-0.00304348	0.453363	-0.182007	0.343609	-0.171463	0.369143	-0.286425	-0.398015	-0.388278	0.406626	-0.332826
7	15	ER	0.284698	0.741776	-0.436043	0.565029	-0.532607	0.692993	-0.649731	-0.748043	-0.740227	0.742512	-0.739384	-0.80724	-0.453866	0.735956	-0.382298	0.52167	-0.564268	0.634695	-0.64469	-0.73909	-0.715995	0.705537	-0.691436	-0.699965	-0.523861	0.731066	-0.39381	0.501164	-0.552993	0.61878	-0.63045	-0.733179	-0.706497	0.693569	-0.678581	-0.63214	-0.578663	0.729556	-0.425516	0.434924	-0.546145	0.622007	-0.622139	-0.730229	-0.704692	0.696063	-0.684181
7	16	structured cytoplasm	0.308168	-0.523023	1.01601	-0.849901	-0.0306121	-0.870451	0.330579	0.536204	0.649874	-0.683598	0.78414	0.746783	0.0057729	-0.554941	0.656539	-0.621956	-0.0101477	-0.841315	0.371157	0.55529	0.650909	-0.687494	0.730609	0.556019	0.1364	-0.563149	0.492846	-0.335664	0.0335519	-0.790452	0.400991	0.565756	0.638068	-0.667675	0.673549	0.368886	0.248145	-0.561152	0.337187	0.0296794	0.119606	-0.746763	0.453781	0.570751	0.624515	-0.64752	0.625304
7	17	nucleoli	0.219965	0.902636	-0.433511	0.384338	-0.776545	0.77484	-0.964624	-0.999113	-0.954734	0.846005	-0.873257	-0.020667	-1.56168	0.968911	-0.341088	-0.00583491	-0.826675	0.772877	-0.940446	-1.03907	-0.979695	0.906283	-0.919884	-0.432012	-1.55425	0.958388	-0.305814	-0.70862	-0.840105	0.78092	-0.924039	-1.02616	-0.972188	0.911335	-0.940819	-0.476499	-1.54309	0.954873	-0.254015	-1.55186	-0.850192	0.805277	-0.914223	-1.02003	-0.974128	0.927153	-0.972309
7	18	nucleoli	0.888954	-1.36978	-0.0905284	-1.86729	-0.843462	-1.01912	-0.412547	0.880179	0.881105	-1.31832	0.985411	1.89414	-0.0743493	-1.24173	-0.20317	-1.67983	-0.88972	-0.701293	-0.468041	0.695119	0.654633	-1.06883	0.707684	1.82356	0.0200606	-1.12373	-0.281743	-1.49539	-0.877339	-0.506156	-0.455129	0.604326	0.534153	-0.8688	0.526902	1.62465	0.168969	-1.02867	-0.39304	-1.20131	-0.871264	-0.327096	-0.454388	0.535242	0.439566	-0.679454	0.359972
7	19	nucleoli	0.36847	0.309875	-0.445229	-0.0312771	-1.00396	0.464826	-0.995272	-0.594694	-0.587338	0.345386	-0.513746	0.802929	-1.50145	0.465378	-0.40686	-0.421586	-1.01177	0.525216	-0.969378	-0.708416	-0.689809	0.469509	-0.611138	0.536189	-1.49969	0.549121	-0.450207	-1.24728	-1.00414	0.581968	-0.954241	-0.753271	-0.736216	0.550849	-0.678701	0.582275	-1.48899	0.612652	-0.515952	-2.21757	-0.999995	0.641435	-0.945466	-0.787978	-0.774364	0.623652	-0.746255
7	20	ER	0.1501	-0.734337	0.0923597	-1.11653	-0.500457	-0.69989	-0.223946	0.598945	0.598032	-0.800609	0.724641	1.28801	0.172131	-0.819547	-0.0353297	-0.978273	-0.523834	-0.666253	-0.233992	0.607293	0.590496	-0.84612	0.691193	1.27112	0.255204	-0.828788	-0.0832469	-0.818199	-0.478817	-0.624299	-0.210415	0.602672	0.572745	-0.827358	0.650814	1.1942	0.371075	-0.838821	-0.131073	-0.52126	-0.446856	-0.591561	-0.185849	0.603946	0.569579	-0.799598	0.616108
7	21	nucleoplasm	0.701217	0.432865	-0.261535	0.643784	3.92251	0.581057	1.10659	-0.359719	-0.415714	0.574987	-0.574592	-1.00529	0.343483	0.468505	-0.052313	0.623546	3.19286	0.501116	0.821165	-0.398094	-0.422636	0.538904	-0.475897	-0.86608	0.193584	0.463854	0.266567	0.65579	2.899	0.444603	0.722392	-0.385278	-0.393064	0.492318	-0.397845	-0.731578	0.114911	0.463412	0.743587	0.608073	2.70573	0.408919	0.659734	-0.380945	-0.381138	0.469415	-0.346315
7	22	uniform cytoplasm	0.709724	0.457939	-0.239328	0.258558	-0.273775	0.357196	-0.33118	-0.403832	-0.386166	0.392417	-0.313375	-0.0360513	-0.0348711	0.454948	-0.229489	0.307827	-0.213259	0.376947	-0.302124	-0.394411	-0.385592	0.40162	-0.334859	-0.157968	0.0215761	0.452794	-0.233895	0.347987	-0.199874	0.383733	-0.29681	-0.392062	-0.386206	0.408458	-0.344175	-0.196214	0.00492756	0.449084	-0.241368	0.304903	-0.248212	0.386996	-0.318604	-0.391815	-0.387125	0.410726	-0.346632
7	23	vesicles	0.309723	0.378391	-0.246983	0.212052	-0.322769	0.315971	-0.332581	-0.318738	-0.314332	0.328129	-0.252098	0.0237452	0.132918	0.375594	-0.224286	0.189657	-0.333186	0.317176	-0.340079	-0.315944	-0.311707	0.325112	-0.253743	0.00511524	0.136739	0.368479	-0.189386	0.12729	-0.304629	0.294705	-0.323189	-0.307242	-0.299353	0.309964	-0.22755	0.0628361	0.104707	0.362699	-0.152409	0.131143	-0.248703	0.272234	-0.29684	-0.298712	-0.287711	0.296175	-0.201505
7	24	mitochondria	0.3525	0.829858	-0.39366	0.399131	-0.602935	0.69311	-0.737019	-0.840023	-0.807472	0.775203	-0.740465	-0.444117	-0.691783	0.799937	-0.242166	-0.0769207	-0.613579	0.596456	-0.715136	-0.802262	-0.750183	0.704195	-0.639481	0.0594611	-0.817789	0.785311	-0.140038	-0.635883	-0.618579	0.582759	-0.703796	-0.786711	-0.735061	0.69584	-0.627825	0.343963	-0.894228	0.776664	-0.0480728	-0.857053	-0.579953	0.588275	-0.679869	-0.774421	-0.727276	0.699107	-0.631514
7	25	cytoskeleton	0.1444	-0.468351	-0.286418	0.37152	-0.176755	-0.026727	0.248951	0.441569	0.324398	-0.203722	0.0930053	-0.253232	0.802272	-0.364888	-0.231603	0.321438	-0.223241	0.0147544	0.165626	0.361832	0.266696	-0.11895	0.0501936	-0.282848	0.721732	-0.338073	-0.131958	0.296221	-0.0969916	-0.0667985	0.23899	0.358031	0.288059	-0.164111	0.1354	-0.255783	0.663402	-0.33731	-0.0912415	0.312724	-0.0656417	-0.128684	0.250885	0.363003	0.307429	-0.211429	0.197359
7	26	nucleoplasm	0.490827	0.138489	-0.241535	-0.236641	-0.635503	0.0769372	-0.580603	-0.2056	-0.195669	0.0543188	-0.0685663	0.571802	-0.37043	0.0800619	-0.262848	-0.163107	-0.646405	0.0820855	-0.57928	-0.207592	-0.199031	0.00997061	-0.0775199	0.550244	-0.354308	0.0878174	-0.315052	-0.0782289	-0.648744	0.127055	-0.581627	-0.231583	-0.227722	0.0408482	-0.126251	0.546506	-0.342565	0.0925608	-0.380947	0.0317906	-0.643079	0.166115	-0.574483	-0.24052	-0.240624	0.0724371	-0.164048
7	27	nucleoli	0.498943	-0.239215	-0.422025	-0.437566	-1.00282	0.149077	-0.940115	-0.147188	-0.183275	-0.171296	-0.060346	1.9761	-1.02445	0.0198364	-0.411021	-0.309137	-1.00967	0.282522	-0.933606	-0.368156	-0.390944	0.027209	-0.240274	2.04711	-1.17843	0.235764	-0.491958	-0.208149	-1.00385	0.41311	-0.932592	-0.505786	-0.524547	0.2263	-0.396662	1.96776	-1.17473	0.475485	-0.621294	-0.00201938	-1.00188	0.57724	-0.939561	-0.657699	-0.669096	0.475975	-0.598771
7	28	structured cytoplasm	0.291605	-0.478107	-0.00726821	0.171235	0.364804	-0.350759	0.526107	0.570327	0.5242	-0.459387	0.478153	0.279904	0.933369	-0.421759	-0.0658375	0.279834	0.393188	-0.208474	0.483662	0.526728	0.453102	-0.348272	0.358003	0.0855407	0.969333	-0.401367	-0.0516056	0.397126	0.403719	-0.185271	0.458305	0.505362	0.429795	-0.317694	0.340223	-0.0273075	0.953666	-0.401683	-0.0448321	0.487399	0.357635	-0.214347	0.425196	0.50172	0.435899	-0.339434	0.371675
7	29	nucleoplasm and cytoplasm	0.490987	-0.524876	0.384942	-2.50109	-0.587017	-0.713343	-0.365132	0.463304	0.46999	-0.719678	0.804655	2.14646	-0.575427	-0.911393	0.135513	-2.33951	-0.640675	-0.913585	-0.375412	0.647923	0.65078	-1.11235	1.01504	2.36465	-0.415961	-0.948907	-0.00205509	-2.01377	-0.652056	-0.855802	-0.397744	0.612568	0.605602	-1.12124	0.94766	2.44496	-0.263238	-0.954985	-0.101555	-1.49924	-0.620009	-0.779202	-0.393221	0.580425	0.566843	-1.08915	0.872626
7	30	mitochondria	0.182913	0.346399	-0.387377	0.162464	-0.720116	0.419015	-0.659162	-0.41092	-0.423783	0.371476	-0.398626	-0.0689686	-0.164252	0.372437	-0.285517	-0.299223	-0.721973	0.361735	-0.645111	-0.434035	-0.42108	0.344288	-0.335656	0.308137	-0.327493	0.37145	-0.21789	-0.867832	-0.700144	0.330294	-0.624198	-0.428714	-0.409627	0.325485	-0.295856	0.577453	-0.407152	0.35157	-0.106647	-1.22163	-0.647037	0.294617	-0.5821	-0.401099	-0.380977	0.301435	-0.248728
7	31	cytoskeleton	0.303106	-0.0919453	-0.0548187	0.345014	0.596066	-0.10054	0.555146	0.186465	0.197199	-0.134752	0.196951	-0.0226103	0.669076	-0.00145369	-0.164519	0.497915	0.661777	0.0853453	0.519719	0.09463	0.0684952	0.0166217	0.0139951	-0.350837	0.682058	0.0251651	-0.172856	0.645513	0.716929	0.154631	0.519574	0.0708477	0.0299409	0.0816928	-0.0504367	-0.585859	0.674849	0.035644	-0.191327	0.737539	0.705794	0.179276	0.496983	0.0595434	0.0156637	0.109898	-0.0729704
7	32	focal	0.15179	-0.865952	0.0329987	-0.298198	-0.256029	-0.73141	0.254263	0.840771	0.823251	-0.859527	0.787537	0.720458	0.822675	-0.815	0.0281163	-0.314676	-0.237057	-0.597016	0.24516	0.79667	0.757955	-0.766123	0.710713	0.720807	0.815764	-0.811661	0.156096	-0.411904	-0.0966701	-0.617752	0.320075	0.808695	0.776901	-0.771744	0.759068	0.761478	0.815401	-0.837273	0.420991	-0.408254	0.100537	-0.710942	0.447822	0.856441	0.841842	-0.833355	0.86952
7	33	nucleoli	0.0467244	0.797958	-0.451183	0.571845	-0.662612	0.737938	-0.746977	-0.81411	-0.802364	0.799318	-0.803173	-0.932972	-0.494815	0.786644	-0.402253	0.528687	-0.687617	0.679194	-0.732228	-0.798986	-0.775074	0.761926	-0.755978	-0.834807	-0.559289	0.780228	-0.425547	0.467882	-0.691222	0.661354	-0.722265	-0.791969	-0.764373	0.745843	-0.740468	-0.7273	-0.629728	0.778869	-0.466023	0.324501	-0.694653	0.661333	-0.716494	-0.789516	-0.762608	0.745316	-0.741591
7	34	uniform cytoplasm	0.290646	-0.639007	-0.140021	0.196562	-0.0490832	-0.385203	0.410669	0.65304	0.587906	-0.544383	0.467823	0.187611	0.865849	-0.542246	-0.17518	0.278298	-0.0830495	-0.19419	0.330014	0.572022	0.479218	-0.37057	0.302179	-0.0257499	0.86922	-0.508724	-0.192997	0.350685	-0.119269	-0.154083	0.280414	0.537396	0.445202	-0.317178	0.267329	-0.158871	0.848253	-0.499863	-0.188438	0.378933	-0.116366	-0.175003	0.265002	0.526146	0.445129	-0.325313	0.293153
7	35	uniform cytoplasm	0.2881	-0.591596	-0.303809	0.219803	-0.291348	-0.0392654	-0.0603434	0.463314	0.334366	-0.255453	0.102693	-0.0891292	0.799025	-0.462971	-0.270239	0.128893	-0.332473	0.0439176	-0.136401	0.356218	0.241771	-0.127392	0.0232547	-0.112545	0.705941	-0.447974	-0.269155	0.00547386	-0.36083	0.00156198	-0.161253	0.344015	0.24856	-0.164335	0.073446	-0.0430253	0.645553	-0.453427	-0.250213	-0.143949	-0.358495	-0.0723501	-0.153965	0.351306	0.273591	-0.231997	0.157364
7	36	ER	0.0911889	0.493421	-0.383218	0.517055	-0.177928	0.545352	-0.306158	-0.441261	-0.47197	0.537988	-0.518264	-0.643843	0.242003	0.504993	-0.307646	0.445626	-0.254462	0.479431	-0.348484	-0.450613	-0.457369	0.501307	-0.453264	-0.487338	0.136036	0.504126	-0.273432	0.392339	-0.269022	0.437941	-0.355572	-0.449862	-0.444556	0.473687	-0.408713	-0.345803	0.0425318	0.498004	-0.234016	0.328854	-0.262452	0.411565	-0.352297	-0.442179	-0.431833	0.453385	-0.375744
7	37	nucleoli	0.476915	0.931094	-0.456213	0.470575	-0.845628	0.787551	-1.03345	-1.08693	-1.02741	0.856179	-0.929423	-0.339725	-2.23148	1.0229	-0.396553	0.261641	-0.884009	0.803405	-1.00102	-1.12869	-1.05855	0.936799	-0.98159	-0.287014	-2.25843	1.03066	-0.40918	-0.173152	-0.890663	0.829062	-0.98138	-1.12976	-1.06488	0.967404	-1.03511	-0.530157	-2.20074	1.03315	-0.423378	-0.840761	-0.895866	0.86285	-0.968845	-1.13012	-1.07353	0.994391	-1.08653
7	38	mitochondria	0.205656	0.204075	-0.28755	0.323225	-0.260178	0.277557	-0.193189	-0.137058	-0.17974	0.231175	-0.187741	-0.142226	0.447909	0.194267	-0.16431	0.0700412	-0.30718	0.177498	-0.233496	-0.120721	-0.131229	0.156108	-0.0790245	0.183637	0.327617	0.177216	-0.0315352	-0.220655	-0.296004	0.095477	-0.230716	-0.104179	-0.0998613	0.0961457	0.0157803	0.475736	0.216272	0.153226	0.139946	-0.453494	-0.277311	0.0328755	-0.220502	-0.0817117	-0.0696998	0.0497356	0.0910416
7	39	Golgi	0.168379	-0.439717	0.503238	-0.706286	-0.0980437	-0.651671	0.150293	0.474766	0.519246	-0.583871	0.664028	1.00818	-0.00373674	-0.565114	0.306373	-0.489089	-0.0929329	-0.68286	0.163661	0.557295	0.58411	-0.697173	0.704485	0.9796	0.115901	-0.575733	0.192837	-0.23695	-0.0935725	-0.637957	0.152845	0.549888	0.561854	-0.683006	0.653495	0.888065	0.199078	-0.58815	0.129076	0.0477544	-0.0551637	-0.624476	0.176305	0.556688	0.563954	-0.680501	0.633383
7	40	nucleoli	0.199953	0.205606	-0.436271	-0.196957	-0.952133	0.42141	-0.970035	-0.58149	-0.579855	0.269358	-0.489891	0.860426	-1.52248	0.373615	-0.389816	-0.474785	-0.967427	0.514184	-0.940581	-0.673383	-0.663918	0.459584	-0.592243	0.882225	-1.41035	0.468359	-0.413137	-1.00251	-0.960912	0.597467	-0.925731	-0.720314	-0.713635	0.587392	-0.688354	0.808837	-1.32224	0.497443	-0.443895	-1.62407	-0.95685	0.654069	-0.912983	-0.735266	-0.736395	0.65784	-0.756212
7	41	Golgi	0.233595	-0.184621	-0.280766	0.059524	-0.631255	-0.0588887	-0.43587	0.0409895	0.0344471	-0.136061	0.0153213	0.168008	0.10258	-0.126023	-0.282834	0.101378	-0.645077	0.0360763	-0.442711	-0.0188369	-0.0378258	-0.0431472	-0.069256	0.130389	0.0959882	-0.107708	-0.338106	0.177197	-0.639259	0.0954929	-0.436636	-0.0335172	-0.0638104	0.0118964	-0.120596	0.0563444	0.115354	-0.0924349	-0.41218	0.204226	-0.639876	0.150724	-0.437476	-0.0460498	-0.0863593	0.0583346	-0.166259
7	42	nucleoplasm and cytoplasm	0.219898	-0.429525	0.21173	-0.371358	0.039494	-0.47869	0.23675	0.503944	0.508203	-0.509827	0.583315	0.769886	0.568139	-0.472596	0.0882729	-0.15273	0.122019	-0.41848	0.258781	0.5262	0.500446	-0.513257	0.541364	0.622448	0.672632	-0.475394	0.0217973	0.0793794	0.16649	-0.371511	0.264959	0.518363	0.477954	-0.488879	0.496143	0.461056	0.737639	-0.473188	-0.0783651	0.350089	0.171848	-0.335246	0.251779	0.505022	0.458883	-0.46831	0.457127
7	43	mitochondria	1	-1.28551	1.34001	-2.77284	-0.260494	-1.64117	0.218198	1.22762	1.26546	-1.53893	1.64745	2.25488	-0.191382	-1.79073	1.13895	-2.93895	-0.270389	-2.09956	0.29422	1.5459	1.62425	-2.06809	2.02796	2.48648	0.0108912	-1.91683	1.05446	-2.8174	-0.273935	-2.17615	0.292718	1.58702	1.6721	-2.17333	2.06236	2.6092	0.209617	-1.99858	1.04751	-2.24584	-0.256508	-2.20207	0.316362	1.62288	1.71133	-2.21849	2.06835
7	44	nucleoplasm and cytoplasm	0.104611	-0.0831626	-0.159199	0.464566	0.922512	0.00658944	0.685903	0.199805	0.161197	-0.0626791	0.0805811	-0.203416	0.69035	-0.00774248	-0.190553	0.5614	1.02921	0.152911	0.642854	0.134828	0.0685572	0.0734889	-0.0640131	-0.512081	0.709502	0.0167528	-0.192124	0.710973	1.00271	0.192441	0.602625	0.111438	0.0407038	0.118482	-0.102486	-0.714069	0.691158	0.0212966	-0.209048	0.826788	0.970908	0.179139	0.570968	0.106235	0.0410568	0.111305	-0.0857947
7	45	nucleoli and cytoplasm	0.30945	-0.494147	-0.24445	0.471545	0.319705	-0.105118	0.64141	0.501977	0.39905	-0.265817	0.126724	-0.454673	0.777355	-0.367242	-0.233969	0.49876	0.252786	0.0418213	0.539263	0.404436	0.292551	-0.088582	0.00109369	-0.580436	0.705961	-0.325521	-0.211581	0.554843	0.232455	0.041049	0.50446	0.371562	0.272948	-0.0705993	0.0136649	-0.617734	0.645921	-0.311981	-0.211109	0.599181	0.200133	0.00633044	0.471648	0.358962	0.274972	-0.094318	0.0540301
7	47	structured cytoplasm	0.350863	-0.670016	0.698753	-0.313822	0.905084	-0.818193	1.01326	0.824863	0.869591	-0.79823	0.937386	0.839169	0.795109	-0.65416	0.423294	-0.0397483	1.16065	-0.688031	1.0721	0.812598	0.81121	-0.74789	0.838598	0.64747	0.896768	-0.652523	0.346643	0.179536	1.15516	-0.615022	1.03452	0.801741	0.774891	-0.711418	0.780835	0.465053	0.951973	-0.650943	0.381217	0.400917	1.30742	-0.608065	1.07553	0.801085	0.772449	-0.705791	0.779952
7	48	ER	0.0863576	-0.0663756	-0.216742	0.247098	-0.145072	0.0997456	-0.0327141	0.093008	0.0393764	0.0238473	-0.0209794	-0.0513926	0.513781	-0.0423303	-0.137185	0.125801	-0.155731	0.065666	-0.0664783	0.0814507	0.0449682	0.00742219	0.0195613	0.0776188	0.443768	-0.0498581	-0.0337986	-0.068853	-0.173803	-0.00998287	-0.0859898	0.0862528	0.0657006	-0.0495838	0.102464	0.285012	0.346047	-0.0716512	0.100693	-0.225416	-0.170501	-0.0886155	-0.0852935	0.105535	0.0963273	-0.109989	0.188809
8	1	nucleoplasm	0.36172	0.580296	-0.32924	0.178257	-0.635116	0.446076	-0.734879	-0.639582	-0.605013	0.500457	-0.497344	-0.0365999	-0.865153	0.526104	-0.321853	0.240661	-0.635794	0.416916	-0.710035	-0.609977	-0.576382	0.44964	-0.477014	-0.0440764	-0.844978	0.525383	-0.377459	0.341753	-0.637668	0.447639	-0.701737	-0.614747	-0.587846	0.470078	-0.518025	-0.0844832	-0.817914	0.542759	-0.454992	0.392536	-0.646191	0.500397	-0.701104	-0.630905	-0.612073	0.514271	-0.577848
8	2	structured cytoplasm	0.215406	0.432499	-0.408022	0.604683	0.135766	0.591444	-0.121632	-0.391875	-0.449926	0.568801	-0.601784	-0.99628	0.204957	0.464205	-0.349919	0.591513	-0.00144244	0.536686	-0.200228	-0.423281	-0.454246	0.5484	-0.547905	-0.911908	0.0869124	0.469075	-0.335747	0.616051	-0.0547944	0.494368	-0.225955	-0.427966	-0.443281	0.513197	-0.497946	-0.81447	-0.000225677	0.468973	-0.351707	0.665962	-0.0676175	0.463822	-0.230877	-0.426067	-0.432766	0.487263	-0.462096
8	3	nucleoli and cytoplasm	0.34104	0.426462	-0.347783	0.455604	-0.260001	0.45472	-0.314478	-0.375386	-0.397243	0.446375	-0.414409	-0.436262	0.215116	0.44226	-0.319796	0.485011	-0.273463	0.448616	-0.329998	-0.388589	-0.402178	0.455106	-0.419486	-0.499549	0.196964	0.446152	-0.319728	0.518943	-0.276964	0.431801	-0.333638	-0.393379	-0.398766	0.445048	-0.401882	-0.493126	0.141338	0.445074	-0.330227	0.492069	-0.296249	0.421995	-0.342818	-0.393793	-0.395423	0.436933	-0.387236
8	4	cytoskeleton	0.513084	0.344264	-0.0130661	0.210317	0.406221	0.197076	0.0300149	-0.260421	-0.231037	0.250613	-0.135654	0.090363	0.0682988	0.323287	-0.0874303	0.355023	0.543059	0.220801	0.0544496	-0.245148	-0.233076	0.244202	-0.161704	-0.121892	0.139904	0.310553	-0.107929	0.552694	0.698711	0.233611	0.108407	-0.230725	-0.227259	0.246495	-0.174168	-0.28894	0.177715	0.307815	-0.163903	0.704312	0.694862	0.25842	0.0971946	-0.233969	-0.235721	0.261023	-0.203676
8	5	cytoskeleton	0.232303	-0.367242	0.114505	-0.198373	0.034612	-0.349111	0.215685	0.404582	0.384848	-0.382966	0.401229	0.337201	0.477626	-0.411879	0.0537269	-0.150928	0.00318865	-0.364392	0.177151	0.419347	0.403767	-0.418431	0.415654	0.366426	0.485701	-0.414296	0.0465086	-0.0578475	-0.0102801	-0.373775	0.158281	0.409473	0.398668	-0.433242	0.430984	0.419948	0.480964	-0.417294	0.0413585	0.0688166	-0.028156	-0.376746	0.14076	0.403851	0.395339	-0.444036	0.442118
8	6	nucleoplasm	0.279859	0.984715	-0.456452	0.605349	-0.60475	0.816602	-0.851568	-1.04715	-0.994758	0.924873	-0.939841	-0.94707	-1.28457	0.960086	-0.415488	0.613419	-0.624435	0.7796	-0.823067	-1.01961	-0.966988	0.89994	-0.924522	-1.10182	-1.28596	0.949423	-0.453963	0.654389	-0.628037	0.787958	-0.808173	-1.00733	-0.95967	0.904373	-0.945957	-1.19122	-1.28689	0.949541	-0.533787	0.687201	-0.624428	0.811713	-0.796598	-1.00528	-0.963956	0.921851	-0.979905
8	7	structured cytoplasm	0.267691	-0.0820564	-0.0373071	0.331143	0.696471	-0.0971968	0.535625	0.191499	0.18474	-0.1236	0.179589	0.0598159	0.511422	-0.0311462	-0.113936	0.448145	0.70506	0.0377165	0.477655	0.147374	0.112087	-0.0228717	0.0533091	-0.207555	0.562025	-0.0124283	-0.127325	0.610923	0.71241	0.0818221	0.455467	0.129488	0.0853862	0.0195724	0.0112287	-0.398103	0.562461	-0.00924707	-0.133679	0.714596	0.735925	0.0815553	0.449879	0.126818	0.0850442	0.0237743	0.0123177
8	8	ER	0.0699336	0.508982	-0.405923	0.512757	-0.190912	0.593721	-0.352693	-0.474451	-0.512658	0.59161	-0.593818	-0.769228	0.165495	0.521583	-0.352845	0.495517	-0.256921	0.54265	-0.383547	-0.484533	-0.504728	0.564024	-0.54517	-0.696798	0.0826744	0.520272	-0.364595	0.511031	-0.297823	0.509126	-0.398682	-0.483567	-0.492928	0.532444	-0.506251	-0.606518	0.00537591	0.517294	-0.381341	0.489595	-0.287621	0.485252	-0.392152	-0.478628	-0.482613	0.510501	-0.476257
8	9	plasma membrane	0.410088	-1.17919	-0.0210663	0.491285	2.29228	-0.649691	2.3413	1.34614	1.18299	-0.929058	0.767689	-0.142727	1.52488	-0.985577	-0.0259127	0.546339	2.19093	-0.389922	2.07373	1.18365	0.997294	-0.644041	0.549723	-0.377365	1.4479	-0.922704	0.0943598	0.653276	2.07775	-0.41872	1.95373	1.12773	0.970892	-0.630306	0.601245	-0.409008	1.37036	-0.909969	0.228367	0.727526	1.98368	-0.529512	1.85958	1.11302	0.992989	-0.705233	0.721898
8	10	nucleoplasm	0.256712	0.875706	-0.460259	0.580034	-0.703595	0.779035	-0.863344	-0.944621	-0.912734	0.851925	-0.884822	-0.844281	-1.12445	0.8756	-0.416791	0.549101	-0.74639	0.732443	-0.846533	-0.939556	-0.897763	0.82388	-0.849413	-0.703048	-1.20491	0.880414	-0.457918	0.526969	-0.754546	0.739926	-0.83496	-0.939785	-0.898937	0.833592	-0.868504	-0.646828	-1.23805	0.894065	-0.533717	0.457457	-0.761613	0.767518	-0.828716	-0.94725	-0.910416	0.861982	-0.907848
8	11	ER	0.119968	-0.156238	0.314741	-0.249851	0.0272374	-0.331302	0.181811	0.227046	0.27896	-0.264793	0.369079	0.498415	0.317342	-0.165375	0.112351	-0.024562	0.0633618	-0.266392	0.193339	0.230111	0.25333	-0.248527	0.307626	0.342871	0.402243	-0.159914	0.0125183	0.170675	0.0330166	-0.207793	0.169351	0.217225	0.221893	-0.217164	0.250884	0.195955	0.440494	-0.161161	-0.0175498	0.357208	0.118627	-0.188865	0.209846	0.223014	0.220641	-0.207368	0.236859
8	12	nucleoplasm and cytoplasm	0.148492	0.134252	-0.0680979	0.218165	0.0953958	0.0860825	0.00492754	-0.0684444	-0.0659321	0.090129	-0.028258	0.0602938	0.223685	0.138465	-0.126832	0.346825	0.163926	0.147273	0.00917907	-0.0732822	-0.0890199	0.131587	-0.0940554	-0.16724	0.29262	0.140918	-0.188386	0.548496	0.166482	0.187644	0.000659035	-0.079351	-0.105338	0.16632	-0.141683	-0.392169	0.323011	0.145655	-0.267838	0.706576	0.14937	0.214561	-0.0142061	-0.0881142	-0.117649	0.188512	-0.173765
8	13	ERGIC	0.984667	0.762085	-0.419916	0.540957	-0.478284	0.654798	-0.647777	-0.779686	-0.750186	0.716538	-0.707684	-0.72707	-0.665476	0.759513	-0.399982	0.606353	-0.50238	0.658944	-0.640841	-0.778077	-0.752525	0.727114	-0.733308	-0.906876	-0.661118	0.756743	-0.447669	0.723249	-0.497534	0.674145	-0.626885	-0.774266	-0.753203	0.741885	-0.761534	-1.04637	-0.660938	0.761308	-0.513323	0.744046	-0.496565	0.694687	-0.620246	-0.778676	-0.760957	0.758234	-0.78959
8	14	ER	0.199679	0.827955	-0.427094	0.582543	-0.363932	0.721519	-0.634091	-0.838968	-0.813873	0.792331	-0.785241	-0.825752	-0.647644	0.81607	-0.376914	0.591656	-0.363618	0.683687	-0.617355	-0.824306	-0.794418	0.770726	-0.763204	-0.893559	-0.668218	0.80915	-0.405272	0.672674	-0.371668	0.677189	-0.610584	-0.816585	-0.786455	0.765861	-0.763739	-0.901456	-0.70193	0.806514	-0.442257	0.672672	-0.377654	0.683927	-0.606229	-0.811955	-0.783811	0.770751	-0.773648
8	15	ER	0.375573	0.938208	-0.462114	0.580081	-0.76279	0.800502	-0.874647	-0.986564	-0.946093	0.897097	-0.907594	-0.945489	-1.00589	0.916534	-0.416239	0.522678	-0.787298	0.7445	-0.847971	-0.961956	-0.913103	0.855507	-0.864223	-0.838414	-1.06039	0.908339	-0.461612	0.515501	-0.782731	0.747796	-0.830761	-0.95336	-0.90713	0.85678	-0.879131	-0.835485	-1.089	0.907967	-0.54345	0.451355	-0.790087	0.769626	-0.823392	-0.951817	-0.911235	0.872993	-0.910649
8	16	structured cytoplasm	0.348668	-0.238203	0.304467	-0.098383	0.462144	-0.36564	0.454014	0.352412	0.375342	-0.3409	0.445483	0.522408	0.404272	-0.271127	0.118776	0.126875	0.55838	-0.304788	0.46098	0.374572	0.365395	-0.345015	0.397819	0.344756	0.500196	-0.28639	0.0762334	0.35078	0.669393	-0.276034	0.492741	0.384105	0.359441	-0.338781	0.371991	0.190269	0.548932	-0.282496	-0.0213168	0.575328	0.693407	-0.245911	0.485243	0.372334	0.341959	-0.321197	0.336907
8	17	nucleoli	0.175971	1.07259	-0.476129	0.429939	-1.01292	0.871831	-1.08755	-1.184	-1.11423	1.00558	-1.04941	-0.830811	-2.22977	1.03463	-0.42861	-0.13539	-1.02434	0.813493	-1.03847	-1.13641	-1.06497	0.955129	-1.00224	-0.422473	-2.23843	1.0196	-0.474927	-1.13434	-1.01894	0.82393	-1.01454	-1.1189	-1.05493	0.958962	-1.0281	-0.222003	-2.22478	1.01715	-0.546435	-2.34572	-1.01334	0.853296	-0.998349	-1.11369	-1.05819	0.979307	-1.07025
8	18	nucleoli	0.243436	0.583423	-0.321769	-0.086732	-0.84106	0.441848	-0.849945	-0.671185	-0.632099	0.500308	-0.517173	0.0306721	-1.18621	0.537186	-0.327512	-0.185377	-0.86038	0.413146	-0.82781	-0.655366	-0.61223	0.456438	-0.507155	0.106449	-1.17527	0.54031	-0.392547	-0.228885	-0.857174	0.444723	-0.815477	-0.665689	-0.627478	0.481608	-0.55516	0.116765	-1.15111	0.55987	-0.493771	-0.243609	-0.859262	0.500569	-0.81082	-0.685151	-0.65399	0.530992	-0.622115
8	19	nucleoli	0.356982	0.773813	-0.462541	0.155979	-0.992056	0.69987	-1.06834	-0.96327	-0.919905	0.69958	-0.794764	0.64781	-2.12029	0.963727	-0.419231	0.00749061	-1.00515	0.780211	-1.03476	-1.073	-1.01207	0.891446	-0.935862	0.155413	-2.0551	0.993091	-0.458128	-0.609432	-1.00101	0.820467	-1.01359	-1.09081	-1.0339	0.948311	-1.01365	-0.200059	-1.99234	1.00202	-0.516104	-1.50199	-0.997983	0.858494	-0.999353	-1.09688	-1.04754	0.982438	-1.07277
8	20	ER	0.190424	-0.0636065	0.0351243	-0.82585	-0.59837	-0.207727	-0.424404	0.0680726	0.0810881	-0.192357	0.255839	1.04982	-0.299376	-0.264603	0.0072746	-0.568965	-0.483754	-0.332953	-0.331223	0.208156	0.212759	-0.405891	0.401514	1.12698	-0.176862	-0.300972	-0.0583304	-0.336375	-0.431083	-0.321804	-0.310131	0.213577	0.209758	-0.42676	0.384982	1.11311	-0.0949033	-0.305758	-0.155915	-0.0994164	-0.441333	-0.270814	-0.322904	0.192184	0.183608	-0.407004	0.333941
8	21	nucleoplasm	0.323314	1.03534	-0.461217	0.646224	-0.454003	0.859653	-0.865163	-1.1232	-1.0643	0.983674	-1.01997	-1.27851	-1.62159	1.00466	-0.404963	0.625393	-0.529271	0.802352	-0.845415	-1.08639	-1.02447	0.937182	-0.972891	-1.19892	-1.65675	0.992152	-0.436573	0.664735	-0.551339	0.809241	-0.832495	-1.07072	-1.01431	0.939393	-0.992889	-1.21457	-1.6487	0.99182	-0.474579	0.587153	-0.564746	0.836513	-0.824563	-1.06783	-1.01879	0.959806	-1.03246
8	22	uniform cytoplasm	0.712892	0.518312	-0.325502	0.464118	0.148149	0.478831	-0.171708	-0.459946	-0.461197	0.494775	-0.445846	-0.40276	0.085473	0.535371	-0.298025	0.528553	0.142288	0.488099	-0.192295	-0.477131	-0.477929	0.51563	-0.469318	-0.566159	0.0837431	0.536774	-0.281476	0.618211	0.146178	0.478596	-0.195746	-0.47822	-0.474228	0.512691	-0.460466	-0.605491	0.0459678	0.537114	-0.271544	0.656101	0.138367	0.468273	-0.200182	-0.477785	-0.470081	0.506695	-0.447327
8	23	vesicles	0.454107	0.621316	-0.376191	0.479441	-0.308039	0.566785	-0.468199	-0.611282	-0.602922	0.601515	-0.586702	-0.582858	-0.374164	0.619743	-0.342244	0.493281	-0.331278	0.552748	-0.471801	-0.606783	-0.596791	0.597928	-0.586347	-0.677389	-0.383047	0.616937	-0.358617	0.537644	-0.334271	0.544374	-0.468932	-0.603462	-0.591497	0.592005	-0.582811	-0.708853	-0.411636	0.616865	-0.414282	0.581186	-0.347313	0.544143	-0.470534	-0.603208	-0.591368	0.592496	-0.587638
8	24	mitochondria	0.536592	0.263404	0.0495374	0.522999	3.9323	0.380915	1.33426	-0.195982	-0.237193	0.394655	-0.336295	-0.513805	0.0976842	0.288777	0.517614	0.275665	3.1633	0.212043	1.00988	-0.198306	-0.192402	0.290347	-0.142504	-0.0534829	-0.075941	0.267856	1.17518	0.0177409	2.8436	0.124077	0.896417	-0.159275	-0.12998	0.220327	-0.0304444	0.194875	-0.130196	0.258965	1.90462	-0.183246	2.61991	0.0722866	0.820929	-0.14481	-0.10898	0.187763	0.0337938
8	25	cytoskeleton	0.344493	0.731329	-0.456589	0.580046	-0.706471	0.723182	-0.71976	-0.746945	-0.747429	0.770289	-0.780752	-1.03233	-0.270289	0.736403	-0.420022	0.565717	-0.743651	0.697976	-0.715557	-0.753286	-0.743932	0.768057	-0.778457	-1.11699	-0.332053	0.734378	-0.460251	0.596822	-0.698031	0.687869	-0.678568	-0.746066	-0.734312	0.754903	-0.767808	-1.13735	-0.373127	0.734282	-0.506876	0.55812	-0.637617	0.684746	-0.639303	-0.739084	-0.726756	0.745232	-0.756349
8	26	nucleoplasm	0.32196	-0.29845	0.1318	-0.821554	-0.316473	-0.406614	-0.234815	0.257646	0.263307	-0.409522	0.434279	1.04796	-0.122902	-0.468459	0.0711547	-0.762154	-0.295052	-0.507911	-0.218637	0.340977	0.351656	-0.575002	0.529606	1.11565	-0.0604517	-0.509088	-0.0233437	-0.538546	-0.314455	-0.491238	-0.228121	0.343659	0.348667	-0.588036	0.49971	1.08592	0.0305303	-0.504196	-0.163958	-0.210319	-0.350663	-0.405985	-0.261272	0.309964	0.303932	-0.542265	0.417173
8	27	nucleoli	0.140067	0.252201	-0.386473	0.0357291	-0.736567	0.33863	-0.715832	-0.444458	-0.434752	0.286441	-0.397997	-0.0420525	-0.592305	0.22457	-0.340004	0.0913186	-0.696617	0.293561	-0.639729	-0.401495	-0.389514	0.261598	-0.371619	-0.106087	-0.504072	0.232013	-0.366493	0.109203	-0.655789	0.3336	-0.614171	-0.407239	-0.404708	0.299963	-0.405405	-0.107247	-0.497235	0.244664	-0.404796	0.0899804	-0.634179	0.381599	-0.600284	-0.414492	-0.420992	0.345935	-0.444841
8	28	structured cytoplasm	0.731956	0.546631	-0.402862	0.501661	-0.38625	0.58284	-0.498475	-0.528437	-0.547216	0.592087	-0.575462	-0.623525	0.0642683	0.564051	-0.371272	0.50289	-0.388991	0.588254	-0.496931	-0.545661	-0.560626	0.622293	-0.606611	-0.793777	0.0495238	0.565459	-0.416657	0.635162	-0.414085	0.585632	-0.501507	-0.547135	-0.55947	0.620393	-0.610022	-0.873033	0.00780099	0.565559	-0.472893	0.666222	-0.420343	0.582774	-0.501324	-0.546311	-0.557137	0.612449	-0.604581
8	29	nucleoplasm and cytoplasm	0.299932	-1.37245	0.800423	-1.81982	-0.223946	-1.46678	0.435273	1.16935	1.23699	-1.42517	1.31355	1.48677	0.0928011	-1.44576	0.596372	-1.70833	-0.173575	-1.37442	0.497956	1.1872	1.21538	-1.42481	1.25471	1.42268	0.19877	-1.43884	0.458096	-1.38942	-0.149746	-1.24838	0.501841	1.16604	1.15876	-1.34038	1.13554	1.26487	0.340114	-1.42655	0.297225	-0.852141	-0.135278	-1.13308	0.505216	1.1461	1.11051	-1.25829	1.02012
8	30	mitochondria	0.374499	0.71687	-0.417996	0.479236	-0.656559	0.651529	-0.705534	-0.739592	-0.724202	0.700809	-0.701788	-0.662406	-0.707593	0.702726	-0.337631	0.318817	-0.650209	0.574122	-0.6793	-0.71801	-0.684595	0.645465	-0.628265	-0.393315	-0.790136	0.690841	-0.312933	0.144263	-0.62745	0.546271	-0.655652	-0.703041	-0.665954	0.624135	-0.601952	-0.220839	-0.840573	0.68322	-0.310897	-0.0194378	-0.617376	0.542235	-0.644211	-0.694087	-0.658721	0.620482	-0.599518
8	31	cytoskeleton	0.633484	0.851359	-0.437377	0.573618	-0.452151	0.743759	-0.685222	-0.872778	-0.845115	0.818499	-0.816997	-0.863844	-0.727551	0.837713	-0.392066	0.559525	-0.492942	0.712074	-0.677989	-0.85806	-0.826246	0.803705	-0.805286	-0.940576	-0.752318	0.831959	-0.431892	0.676829	-0.479271	0.711648	-0.662754	-0.851363	-0.819468	0.803326	-0.815077	-1.01231	-0.773689	0.83195	-0.491351	0.675982	-0.497044	0.727476	-0.661817	-0.8506	-0.821823	0.813816	-0.836257
8	32	focal	0.410548	-0.106504	-0.0079684	-0.32614	-0.177764	-0.175631	-0.102967	0.128064	0.135356	-0.183389	0.228329	0.484867	0.176939	-0.180763	-0.00945153	-0.294184	-0.112014	-0.20815	-0.0595388	0.186605	0.188163	-0.250335	0.269665	0.473546	0.236628	-0.202031	0.00322993	-0.271776	-0.134774	-0.204325	-0.0731778	0.192543	0.190674	-0.256303	0.268829	0.447503	0.262855	-0.229081	0.164316	-0.154736	0.00131933	-0.256381	0.019881	0.229515	0.235654	-0.297813	0.332702
8	33	nucleoli	0.198952	0.441097	-0.436162	0.259969	-0.702757	0.517553	-0.768472	-0.634645	-0.618612	0.493284	-0.609789	-0.512717	-0.721256	0.482245	-0.40636	0.29517	-0.722053	0.554929	-0.752438	-0.663298	-0.65263	0.556824	-0.656717	-0.635611	-0.69151	0.511253	-0.461427	0.340884	-0.72743	0.594438	-0.746041	-0.682815	-0.678185	0.605794	-0.698448	-0.693319	-0.704875	0.540867	-0.56256	0.395638	-0.737181	0.64016	-0.745652	-0.70384	-0.703974	0.659492	-0.745582
8	34	uniform cytoplasm	0.132607	-0.399893	-0.29462	0.489776	0.234895	0.0392532	0.330785	0.370479	0.252176	-0.133071	0.0337942	-0.363542	0.750261	-0.289059	-0.275474	0.528138	0.183447	0.158786	0.24155	0.281993	0.162172	0.031894	-0.0872514	-0.555069	0.708966	-0.257792	-0.284705	0.645569	0.1557	0.163028	0.206048	0.252498	0.143002	0.056102	-0.0914226	-0.660033	0.665485	-0.252687	-0.319394	0.727664	0.132215	0.127547	0.18116	0.248658	0.152209	0.022773	-0.0534591
8	35	uniform cytoplasm	0.152576	-0.0585995	0.0572932	-0.116276	0.0519859	-0.154799	0.0623609	0.117982	0.135155	-0.138636	0.217893	0.357313	0.356262	-0.0768363	-0.0671183	0.0500862	0.0539472	-0.089169	0.0426507	0.117678	0.113181	-0.114958	0.143597	0.12442	0.458779	-0.0678803	-0.16591	0.272737	0.039032	-0.0214678	0.0200207	0.0979051	0.0775509	-0.0683648	0.0701214	-0.101747	0.505382	-0.0644581	-0.24844	0.517628	0.0848338	0.00483825	0.0385926	0.0960368	0.070041	-0.0502286	0.0418397
8	36	ER	0.112461	0.0333768	-0.293706	0.557128	0.890921	0.33691	0.554209	0.0680975	-0.0422835	0.230858	-0.274863	-0.718596	0.714976	0.0877716	-0.158494	0.476458	0.668207	0.204194	0.385877	0.0238258	-0.0334353	0.159555	-0.125635	-0.448674	0.547093	0.0938061	0.00518841	0.41718	0.577798	0.0949019	0.327272	0.0208308	-0.000797023	0.0842555	-0.00548382	-0.210682	0.427875	0.0781485	0.212962	0.341115	0.532556	0.00744435	0.299114	0.036895	0.0341579	0.0233475	0.0907264
8	37	nucleoli	0.461517	1.03535	-0.462264	0.52753	-0.872116	0.850463	-1.01408	-1.12982	-1.06765	0.974995	-1.00653	-0.911066	-1.84463	1.00169	-0.401439	0.264188	-0.904075	0.795629	-0.975259	-1.08797	-1.02378	0.932884	-0.96634	-0.643258	-1.86228	0.987862	-0.418138	-0.18803	-0.906822	0.806712	-0.95463	-1.07146	-1.01414	0.939756	-0.992989	-0.56846	-1.84352	0.985674	-0.447481	-0.81483	-0.9106	0.835811	-0.942745	-1.06674	-1.01751	0.960255	-1.0341
8	38	mitochondria	0.240653	0.56525	-0.397269	0.458216	-0.509971	0.582832	-0.524461	-0.536977	-0.555632	0.595084	-0.56991	-0.55511	0.0238039	0.554444	-0.298278	0.223745	-0.543139	0.480393	-0.532756	-0.519209	-0.507125	0.520904	-0.462931	-0.173913	-0.112335	0.541668	-0.240614	-0.0619677	-0.541826	0.436072	-0.526647	-0.506517	-0.485653	0.48512	-0.409989	0.0788451	-0.211552	0.531507	-0.185185	-0.290643	-0.531634	0.413604	-0.517684	-0.495796	-0.473315	0.467814	-0.380606
8	39	Golgi	0.175972	-0.542561	0.340772	-0.394681	0.00654751	-0.649488	0.340298	0.61914	0.648697	-0.645594	0.716661	0.78225	0.552744	-0.565923	0.278751	-0.15943	0.222899	-0.593609	0.462171	0.659118	0.65885	-0.649272	0.69606	0.692286	0.654553	-0.56636	0.207765	0.0336259	0.233687	-0.545969	0.451729	0.653952	0.63624	-0.626998	0.655436	0.56266	0.705409	-0.561811	0.135332	0.242094	0.23417	-0.523987	0.442109	0.64415	0.622244	-0.614354	0.632423
8	40	nucleoli	0.273239	1.05965	-0.465967	0.433496	-0.950437	0.855107	-1.04552	-1.15713	-1.08958	0.984694	-1.01463	-0.733865	-1.97338	1.01927	-0.404699	-0.0550992	-0.962731	0.792684	-0.99937	-1.10685	-1.03705	0.934345	-0.962694	-0.246313	-2.00364	1.00388	-0.420244	-0.944129	-0.958499	0.800324	-0.976915	-1.08889	-1.02615	0.938456	-0.98492	0.0674274	-2.02049	0.998229	-0.446121	-2.00972	-0.957222	0.827313	-0.963583	-1.08002	-1.02618	0.955978	-1.02038
8	41	Golgi	0.275717	0.405224	-0.197579	0.245805	-0.0660823	0.298653	-0.21504	-0.322444	-0.308504	0.330875	-0.228546	0.0766464	0.145271	0.401748	-0.240009	0.380328	-0.0551865	0.338887	-0.220539	-0.319783	-0.320256	0.347281	-0.272629	-0.123872	0.226259	0.403055	-0.263178	0.499208	-0.0656982	0.357077	-0.227117	-0.32334	-0.329138	0.362682	-0.294323	-0.25677	0.230995	0.400545	-0.29519	0.586275	-0.0681411	0.355623	-0.229769	-0.32196	-0.327346	0.36139	-0.292699
8	42	nucleoplasm and cytoplasm	0.231456	-0.942741	-0.255402	0.36219	0.0314022	-0.307922	0.614328	0.921886	0.753683	-0.598612	0.423214	-0.155826	1.30852	-0.783411	-0.258476	0.417547	-0.0334133	-0.109704	0.492745	0.793182	0.613633	-0.35035	0.232151	-0.375722	1.25596	-0.735527	-0.2615	0.504382	-0.0295051	-0.118033	0.476705	0.757704	0.593568	-0.33041	0.248915	-0.484924	1.20684	-0.719256	-0.2709	0.550207	-0.0322602	-0.17387	0.457726	0.744785	0.601457	-0.378687	0.313423
8	43	mitochondria	0.237638	-0.446555	0.381	-0.369629	0.0986898	-0.582991	0.349409	0.533865	0.559412	-0.548725	0.640227	0.726779	0.533573	-0.489255	0.412702	-0.405037	0.252739	-0.630196	0.420492	0.583001	0.609849	-0.605647	0.701768	0.809697	0.565993	-0.514276	0.577184	-0.522492	0.269234	-0.688687	0.4206	0.602328	0.635341	-0.650668	0.769743	0.943184	0.548816	-0.537622	0.763711	-0.565564	0.231868	-0.735001	0.390534	0.612505	0.650564	-0.689479	0.826853
8	44	nucleoplasm and cytoplasm	0.145979	-0.0405654	0.0534444	0.176469	0.533449	-0.113131	0.35222	0.147404	0.153533	-0.110159	0.19853	0.186604	0.511654	-0.0256302	-0.0275867	0.305488	0.584101	-0.0239436	0.331658	0.127353	0.110286	-0.0526561	0.106727	-0.0876802	0.584696	-0.0183644	-0.0867326	0.506583	0.576368	0.0285483	0.309076	0.114948	0.0848766	-0.0104048	0.05003	-0.318976	0.613081	-0.0166466	-0.140236	0.684007	0.576249	0.04418	0.300626	0.112255	0.0795297	0.0034846	0.0296269
8	45	nucleoli and cytoplasm	0.411607	-0.427114	-0.278373	0.313686	-0.240958	-0.0802753	0.139586	0.45294	0.351935	-0.264808	0.196676	-0.077225	0.965214	-0.337955	-0.249092	0.295443	-0.257307	0.00190583	0.0856805	0.378443	0.283986	-0.155326	0.118396	-0.139735	0.90199	-0.314612	-0.220607	0.217069	-0.280095	-0.0261201	0.0531293	0.354229	0.278257	-0.164089	0.158418	-0.114081	0.834511	-0.309726	-0.180154	0.0919075	-0.289746	-0.0840204	0.0369942	0.345986	0.28835	-0.210528	0.229119
8	47	structured cytoplasm	0.210998	-0.452458	0.332878	0.0371951	0.665514	-0.540825	0.754435	0.55148	0.577737	-0.529407	0.587949	0.362652	0.549648	-0.416391	0.272652	0.18669	0.924867	-0.429061	0.834609	0.542488	0.536017	-0.458929	0.504059	0.178801	0.610016	-0.406285	0.251554	0.359769	0.931781	-0.3836	0.813166	0.535047	0.513676	-0.425961	0.467184	0.0348834	0.631559	-0.403285	0.250897	0.5058	0.896165	-0.377978	0.780058	0.528733	0.506222	-0.418323	0.460812
8	48	ER	0.0675833	0.0610298	-0.105853	0.153906	0.00565613	0.0398668	0.0320515	0.0343091	0.0240547	0.0174937	0.0654039	0.205142	0.477099	0.0631402	-0.0647755	0.088649	-0.0220999	0.0336894	-0.00755525	0.0315795	0.0239546	0.00514523	0.0819857	0.259242	0.454884	0.0514483	0.067516	-0.0397392	0.0139283	-0.0285691	0.0048944	0.0452265	0.0486525	-0.0360871	0.154298	0.415363	0.393905	0.0329254	0.243685	-0.137062	0.0444837	-0.0853191	0.0139013	0.0626322	0.0742605	-0.0755435	0.221389
9	1	nucleoplasm	0.26679	0.872238	-0.404656	0.5189	-0.363791	0.711448	-0.660752	-0.90015	-0.853545	0.803846	-0.780005	-0.53624	-0.904285	0.857414	-0.369914	0.57094	-0.325395	0.697896	-0.629083	-0.883001	-0.840385	0.796486	-0.787598	-0.746199	-0.883368	0.849374	-0.381366	0.63447	-0.296442	0.710611	-0.611949	-0.873199	-0.836667	0.806306	-0.811926	-0.881235	-0.877631	0.847577	-0.395951	0.597466	-0.311661	0.731168	-0.609738	-0.869449	-0.838702	0.822008	-0.839199
9	2	structured cytoplasm	0.199165	-0.383965	-0.310283	0.571697	0.864315	0.172416	0.891508	0.483021	0.306544	-0.0242897	-0.076572	-0.708807	1.14148	-0.275048	-0.234825	0.566447	0.721254	0.142867	0.712969	0.392256	0.256477	0.0156428	-0.0360129	-0.656166	1.00698	-0.248905	-0.130129	0.589229	0.664728	0.0306627	0.651815	0.372015	0.279628	-0.0708607	0.0960072	-0.503942	0.894192	-0.25115	0.00796886	0.561689	0.617243	-0.0802489	0.609676	0.375456	0.312716	-0.157628	0.221848
9	3	nucleoli and cytoplasm	0.633089	0.530042	-0.414533	0.598912	-0.20724	0.583338	-0.356418	-0.52676	-0.54825	0.584532	-0.608313	-0.855298	-0.217896	0.543545	-0.36133	0.602036	-0.271794	0.542446	-0.387008	-0.534063	-0.540526	0.572635	-0.580621	-0.88317	-0.280945	0.54357	-0.35982	0.651703	-0.283063	0.510635	-0.390734	-0.532551	-0.528248	0.546555	-0.548265	-0.848138	-0.338762	0.542355	-0.363844	0.623857	-0.300369	0.492418	-0.395998	-0.530705	-0.521481	0.532448	-0.528743
9	4	cytoskeleton	0.431354	-2.1307	0.297169	0.187199	1.40306	-1.70448	2.70585	2.1596	2.06466	-1.8968	1.59949	0.534948	1.51166	-1.86671	0.214471	0.253972	1.35079	-1.27081	2.45979	1.97205	1.82003	-1.51704	1.2892	0.312256	1.47086	-1.78114	0.371329	0.306911	1.3823	-1.2475	2.39997	1.91611	1.77771	-1.45306	1.30819	0.271767	1.42451	-1.76008	0.569199	0.366731	1.40614	-1.3328	2.37295	1.90654	1.79549	-1.4865	1.39745
9	5	cytoskeleton	0.235726	-1.00679	-0.100471	0.466114	1.47968	-0.527801	1.72707	1.10492	0.967341	-0.754917	0.589737	-0.178636	1.32866	-0.823751	-0.0856825	0.522254	1.44046	-0.275362	1.56899	0.962777	0.799623	-0.471516	0.374106	-0.451683	1.27557	-0.764227	-0.01514	0.621605	1.33346	-0.255952	1.44383	0.906415	0.75786	-0.425717	0.37328	-0.56167	1.217	-0.748094	0.0367888	0.720218	1.30609	-0.323836	1.40024	0.89458	0.770628	-0.470926	0.447725
9	6	nucleoplasm	0.234476	0.842455	-0.427889	0.608733	-0.126486	0.736714	-0.559311	-0.860918	-0.834277	0.809838	-0.810912	-0.863876	-0.745785	0.83151	-0.369817	0.605065	-0.145183	0.707882	-0.554071	-0.847912	-0.818536	0.799728	-0.800553	-0.982623	-0.766441	0.823187	-0.374107	0.658332	-0.161652	0.70857	-0.550545	-0.837785	-0.810274	0.801453	-0.809611	-1.04246	-0.779377	0.821534	-0.39374	0.695951	-0.162325	0.718563	-0.545624	-0.834263	-0.809593	0.807953	-0.823048
9	7	structured cytoplasm	0.280748	-0.537392	1.23649	-1.15301	0.569471	-0.828878	0.715159	0.638413	0.694631	-0.701763	0.872544	1.04413	0.164915	-0.728781	1.40013	-1.06439	0.813377	-1.02342	0.89097	0.835088	0.884607	-0.903887	1.06051	0.989778	0.327301	-0.834057	1.18831	-0.7808	0.728402	-1.07408	0.853537	0.897812	0.938107	-0.986972	1.08599	0.889498	0.457204	-0.871082	1.14097	-0.363549	0.865023	-1.11554	0.928923	0.927893	0.969186	-1.02103	1.10026
9	8	ER	0.209748	-0.0457337	-0.320094	0.422146	-0.0671198	0.246627	0.052579	0.106787	0.00783397	0.127504	-0.144223	-0.370162	0.791799	-0.0020788	-0.240508	0.32024	-0.118565	0.196425	-0.0132461	0.0747026	0.00503883	0.111218	-0.0913769	-0.228835	0.683053	0.00441642	-0.186275	0.210664	-0.136989	0.11682	-0.0359493	0.067547	0.0209785	0.0497266	-0.00180056	-0.0428016	0.571135	-0.00749277	-0.110403	0.0841544	-0.11322	0.0377568	-0.0294381	0.0804702	0.0490657	-0.0142135	0.0885701
9	9	plasma membrane	0.130732	-0.0650437	-0.231161	0.548578	1.13571	0.0642853	0.852767	0.158561	0.115709	-0.0158131	-0.020944	-0.411483	0.428323	0.029552	-0.235331	0.612566	1.15784	0.201963	0.766436	0.0724411	0.0122141	0.130312	-0.15381	-0.653217	0.3973	0.057614	-0.200967	0.716661	1.07727	0.215461	0.697314	0.0440015	-0.00886406	0.159508	-0.161144	-0.744873	0.355211	0.0630238	-0.125107	0.767616	1.12445	0.177672	0.70147	0.0440623	0.00482338	0.137473	-0.115413
9	10	nucleoplasm	0.261122	0.608334	-0.432408	0.461198	-0.291091	0.632662	-0.635144	-0.739254	-0.726263	0.627607	-0.7031	-0.513576	-0.832585	0.663821	-0.370361	0.428744	-0.341372	0.616557	-0.639637	-0.771675	-0.747563	0.647789	-0.69596	-0.467723	-0.900149	0.704049	-0.370184	0.443724	-0.358288	0.635225	-0.638343	-0.788684	-0.762137	0.681599	-0.718019	-0.413987	-0.937313	0.730366	-0.372741	0.390397	-0.375322	0.6639	-0.638818	-0.800329	-0.776394	0.718066	-0.751763
9	11	ER	0.0744491	-0.152522	-0.100461	-0.364159	-0.250635	-0.177728	-0.159586	0.175789	0.184933	-0.220272	0.257363	0.538913	0.393344	-0.158269	-0.159671	-0.128218	-0.222949	-0.10015	-0.137821	0.169254	0.151511	-0.192509	0.190736	0.37103	0.463095	-0.1439	-0.204125	0.0222201	-0.173904	-0.0498128	-0.127387	0.152246	0.123667	-0.151542	0.139553	0.199052	0.504058	-0.14839	-0.21746	0.142566	-0.14883	-0.0518056	-0.10131	0.160819	0.133029	-0.15648	0.151387
9	12	nucleoplasm and cytoplasm	0.141494	0.305815	-0.20618	0.368841	0.18376	0.268268	-0.0386136	-0.230191	-0.233072	0.268657	-0.201683	-0.117343	0.215826	0.319812	-0.241645	0.487481	0.230755	0.332906	-0.046065	-0.241507	-0.262271	0.318663	-0.275058	-0.370326	0.278493	0.32744	-0.28564	0.6779	0.261572	0.369733	-0.0438254	-0.249537	-0.278076	0.354125	-0.319462	-0.593464	0.294286	0.330743	-0.351973	0.814096	0.265674	0.38725	-0.0491394	-0.254933	-0.284991	0.369586	-0.341206
9	13	ERGIC	0.724858	0.45251	-0.397263	0.577788	-0.00219218	0.542219	-0.194292	-0.418248	-0.454909	0.523486	-0.539106	-0.767753	0.0209667	0.477955	-0.351866	0.593722	-0.0517891	0.534371	-0.234844	-0.439274	-0.466796	0.54779	-0.546398	-0.853888	-0.0232029	0.482611	-0.351885	0.658016	-0.0654153	0.508682	-0.243914	-0.44238	-0.459202	0.527976	-0.518594	-0.848999	-0.0810231	0.48235	-0.357167	0.644263	-0.086056	0.487255	-0.253414	-0.441285	-0.451333	0.508291	-0.49227
9	14	ER	0.0975708	-0.0175652	-0.317314	0.491978	0.174409	0.237911	0.20978	0.105815	0.0141382	0.119901	-0.133047	-0.449225	0.835663	0.0354617	-0.231182	0.430673	0.11642	0.189649	0.128893	0.0623121	0.00181124	0.114668	-0.0867009	-0.339146	0.723414	0.0437395	-0.136618	0.371069	0.104751	0.101553	0.106448	0.0557927	0.0226654	0.0542048	0.0120931	-0.158468	0.613284	0.0362636	-0.0263267	0.278426	0.0815416	0.0263735	0.0868404	0.0620413	0.0457032	0.00215946	0.0967232
9	15	ER	0.313052	0.833439	-0.449631	0.591188	-0.584425	0.753376	-0.725676	-0.858143	-0.838843	0.823667	-0.834499	-0.972621	-0.755458	0.81967	-0.39191	0.540253	-0.594834	0.682202	-0.705631	-0.839204	-0.805479	0.771148	-0.768295	-0.800518	-0.830202	0.812641	-0.418519	0.53667	-0.600967	0.669965	-0.696957	-0.831882	-0.795892	0.762145	-0.763445	-0.723176	-0.877418	0.810961	-0.456443	0.462131	-0.58691	0.676175	-0.684265	-0.828171	-0.793991	0.767052	-0.773959
9	16	structured cytoplasm	0.56815	0.259875	-0.157249	0.163978	-0.167833	0.175266	-0.167686	-0.198225	-0.178081	0.191108	-0.11235	0.128748	0.135184	0.278003	-0.209078	0.352157	-0.0597931	0.247143	-0.129962	-0.211757	-0.213581	0.236652	-0.183149	-0.11067	0.207823	0.281116	-0.222074	0.47592	-0.0209521	0.275744	-0.116592	-0.213187	-0.223671	0.261902	-0.213343	-0.276883	0.227175	0.28091	-0.233683	0.539455	-0.0209043	0.277862	-0.119354	-0.213963	-0.224676	0.264947	-0.213835
9	17	nucleoli	0.270114	1.06167	-0.469489	0.360447	-1.00336	0.857065	-1.08526	-1.17006	-1.10073	0.98377	-1.01924	-0.364563	-2.19394	1.03671	-0.408456	-0.315382	-1.00742	0.806021	-1.0338	-1.13444	-1.06168	0.950759	-0.988216	-0.188922	-2.18018	1.02114	-0.422897	-1.53108	-0.9961	0.816194	-1.00752	-1.11595	-1.05107	0.956006	-1.01369	0.0841954	-2.18081	1.01724	-0.449121	-2.92903	-0.99093	0.845293	-0.991706	-1.10889	-1.05349	0.976238	-1.05434
9	18	nucleoli	0.243601	0.670865	-0.429682	0.270188	-0.892049	0.582227	-0.944656	-0.807748	-0.767005	0.613667	-0.684796	-0.220901	-1.4792	0.665056	-0.394658	0.150839	-0.905941	0.568368	-0.914434	-0.808642	-0.76581	0.603287	-0.681467	0.0289916	-1.50744	0.676436	-0.436776	-0.116459	-0.902852	0.607602	-0.900158	-0.819456	-0.783133	0.640546	-0.732748	0.160185	-1.50004	0.703817	-0.498612	-0.510024	-0.902151	0.663849	-0.892581	-0.838543	-0.810247	0.699337	-0.799913
9	19	nucleoli	0.395367	1.11377	-0.474508	0.425562	-1.01013	0.885355	-1.10766	-1.23948	-1.15917	1.02801	-1.07769	-0.718246	-2.59057	1.0713	-0.421452	-0.168321	-1.0178	0.829365	-1.05389	-1.1859	-1.10708	0.980312	-1.03558	-0.270999	-2.5664	1.05557	-0.452598	-1.32198	-1.01071	0.843678	-1.0283	-1.16656	-1.09671	0.987754	-1.06744	0.00742331	-2.53121	1.05303	-0.479144	-2.82375	-0.999195	0.877188	-1.0106	-1.16049	-1.10048	1.01165	-1.11564
9	20	ER	0.121547	-0.304711	0.437054	-0.880773	-0.288478	-0.495353	-0.103192	0.327101	0.353123	-0.445096	0.532338	0.982027	-0.117036	-0.500143	0.332335	-0.827411	-0.213399	-0.647059	-0.0383316	0.466892	0.49322	-0.651421	0.678468	1.05232	-0.0046234	-0.559961	0.309802	-0.625138	-0.173895	-0.686253	-0.0066116	0.503725	0.528808	-0.699642	0.698316	1.03829	0.0996183	-0.567896	0.182148	-0.348736	-0.178469	-0.642838	-0.0225686	0.489317	0.508058	-0.682282	0.651107
9	21	nucleoplasm	0.306531	0.706852	-0.373528	0.644518	1.47671	0.703439	0.081726	-0.680476	-0.690539	0.744949	-0.750852	-1.06921	-0.17211	0.712707	-0.250938	0.623351	1.10345	0.642515	-0.0475859	-0.690797	-0.683531	0.714215	-0.687521	-0.985435	-0.287553	0.704875	-0.139606	0.670846	0.958046	0.615751	-0.0890012	-0.679238	-0.664644	0.690222	-0.652745	-0.898934	-0.347406	0.705564	-0.00387138	0.645987	0.862706	0.609817	-0.116266	-0.678467	-0.662821	0.687449	-0.642797
9	22	uniform cytoplasm	0.582251	0.238068	-0.246191	0.451781	0.427913	0.247635	0.2039	-0.163435	-0.17682	0.22523	-0.197949	-0.310624	0.179597	0.27728	-0.21812	0.477345	0.501296	0.302793	0.185656	-0.1942	-0.215671	0.28466	-0.255174	-0.440251	0.181178	0.286778	-0.178399	0.571508	0.505289	0.295545	0.173131	-0.201645	-0.217542	0.289	-0.245548	-0.479159	0.145971	0.284174	-0.123476	0.592847	0.50865	0.26716	0.165349	-0.1974	-0.205459	0.270625	-0.21193
9	23	vesicles	0.309279	0.347373	-0.276556	0.0031926	-0.596695	0.282634	-0.567567	-0.382793	-0.37428	0.303905	-0.299546	-0.0974812	-0.303246	0.277283	-0.25338	-0.0341276	-0.617761	0.202541	-0.560523	-0.352626	-0.328545	0.213985	-0.233397	0.0295017	-0.336499	0.273517	-0.270581	-0.0613084	-0.605668	0.213177	-0.556344	-0.364522	-0.339681	0.215018	-0.244777	0.123181	-0.362573	0.252534	-0.29703	-0.033659	-0.602648	0.212984	-0.545793	-0.350986	-0.32781	0.211881	-0.24679
9	24	mitochondria	0.389049	0.863611	-0.409006	0.512014	-0.489184	0.740529	-0.72416	-0.891167	-0.859318	0.827193	-0.819486	-0.749996	-0.90184	0.83645	-0.306143	0.2593	-0.568676	0.649876	-0.725894	-0.857717	-0.809119	0.758711	-0.728399	-0.338917	-1.01049	0.822144	-0.259848	-0.0405561	-0.588483	0.635872	-0.718794	-0.841605	-0.792795	0.747379	-0.718771	-0.133712	-1.06179	0.813867	-0.237603	-0.335729	-0.59844	0.643617	-0.712805	-0.831284	-0.78736	0.751999	-0.72899
9	25	cytoskeleton	0.24781	0.521704	-0.412948	0.539993	-0.420715	0.58409	-0.446907	-0.503119	-0.526665	0.586158	-0.586178	-0.78263	0.0786343	0.543129	-0.346426	0.472452	-0.437367	0.554358	-0.452242	-0.522681	-0.527649	0.585435	-0.566757	-0.749026	-0.00583845	0.545197	-0.338645	0.437648	-0.423236	0.538281	-0.440514	-0.522686	-0.521188	0.573674	-0.548685	-0.741753	-0.0599491	0.546972	-0.327708	0.384223	-0.371353	0.530194	-0.414325	-0.520726	-0.516595	0.564999	-0.534508
9	26	nucleoplasm	0.542256	-0.175453	0.237667	-0.242004	-0.166881	-0.363366	0.0144148	0.151644	0.213546	-0.26912	0.274307	0.322183	-0.170375	-0.195397	0.070555	-0.0995708	-0.176531	-0.304447	0.0125294	0.156224	0.194561	-0.261151	0.221253	0.195589	-0.0999899	-0.192632	-0.0187852	0.0900623	-0.162402	-0.250129	0.0241296	0.151302	0.171777	-0.231205	0.168455	0.0789633	-0.0502778	-0.183317	-0.142111	0.319121	-0.165355	-0.187828	0.018698	0.137119	0.143869	-0.191919	0.105453
9	27	nucleoli	0.159969	0.146861	-0.397614	0.0411931	-0.755244	0.322973	-0.626481	-0.255399	-0.287822	0.218908	-0.301364	-0.0179568	-0.101057	0.20504	-0.354802	-0.0363799	-0.739035	0.3417	-0.608177	-0.316149	-0.335637	0.264995	-0.329689	0.0450481	-0.174152	0.222184	-0.372346	-0.13448	-0.730699	0.341875	-0.600511	-0.330443	-0.344993	0.272646	-0.328998	0.122261	-0.209303	0.243684	-0.374042	-0.23805	-0.682556	0.341009	-0.56846	-0.338388	-0.349645	0.284626	-0.320411
9	28	structured cytoplasm	0.197831	-0.636924	0.21323	0.200228	1.01842	-0.577778	1.14545	0.772944	0.753537	-0.648765	0.687104	0.342826	0.994785	-0.539702	0.0887533	0.331721	1.0773	-0.373858	1.06935	0.692808	0.63476	-0.489656	0.512285	0.0778761	1.02995	-0.508116	0.141832	0.454279	1.09959	-0.335803	1.03382	0.664313	0.601587	-0.445278	0.48705	-0.0668794	1.02089	-0.504386	0.219022	0.572782	1.15251	-0.373688	1.03204	0.66329	0.612753	-0.465607	0.52958
9	29	nucleoplasm and cytoplasm	0.700529	0.181935	-0.37989	0.257952	-0.425221	0.306847	-0.569759	-0.369245	-0.362416	0.238447	-0.365616	-0.241668	-0.351959	0.253309	-0.354873	0.2938	-0.428924	0.401261	-0.572618	-0.43632	-0.443865	0.355584	-0.463188	-0.43129	-0.351289	0.277371	-0.420191	0.492826	-0.434682	0.473416	-0.571891	-0.458843	-0.477959	0.43289	-0.53703	-0.615404	-0.324261	0.295507	-0.503292	0.614345	-0.450463	0.524467	-0.572428	-0.473453	-0.501493	0.487692	-0.58981
9	30	mitochondria	0.146437	0.10572	-0.38056	-0.0213212	-0.782211	0.285031	-0.647506	-0.250328	-0.275893	0.183612	-0.275199	0.190234	-0.13441	0.194271	-0.28084	-0.458659	-0.787543	0.259983	-0.638597	-0.307866	-0.303908	0.214447	-0.245175	0.462465	-0.268326	0.198605	-0.209268	-1.02898	-0.7604	0.234387	-0.612925	-0.302278	-0.293561	0.207507	-0.209936	0.651613	-0.321815	0.18256	-0.0910161	-1.37484	-0.719934	0.210622	-0.57413	-0.277877	-0.270476	0.197263	-0.173649
9	31	cytoskeleton	0.220539	-0.288522	-0.127011	0.267634	0.0166638	-0.139167	0.296943	0.333917	0.300686	-0.224771	0.21139	-0.0734679	0.801167	-0.198748	-0.185378	0.361878	0.0668566	0.0136238	0.285149	0.254802	0.198451	-0.0772857	0.0662175	-0.278239	0.784959	-0.174757	-0.185691	0.437189	0.129046	0.042255	0.303579	0.238997	0.180154	-0.0457875	0.0506585	-0.386007	0.755256	-0.166273	-0.186079	0.465818	0.112796	0.0506373	0.282979	0.230017	0.173482	-0.0375863	0.0537774
9	32	focal	0.346	-0.46911	-0.15627	-0.308072	-0.409502	-0.313799	-0.149232	0.399679	0.378877	-0.443411	0.361852	0.553832	0.40233	-0.427865	-0.182666	-0.247114	-0.448465	-0.171157	-0.188713	0.345838	0.296483	-0.342506	0.254691	0.4793	0.408801	-0.417656	-0.170035	-0.273271	-0.427244	-0.15765	-0.172419	0.342183	0.289957	-0.325317	0.251284	0.445658	0.422047	-0.415764	-0.175316	-0.238652	-0.419304	-0.171534	-0.162485	0.34116	0.293533	-0.335809	0.268972
9	33	nucleoli	0.106612	0.912004	-0.458458	0.540212	-0.805571	0.782194	-0.887745	-0.954713	-0.918077	0.872033	-0.876998	-0.867833	-0.924013	0.889598	-0.417154	0.487008	-0.828783	0.732939	-0.860333	-0.928716	-0.886264	0.837352	-0.843447	-0.805142	-0.958159	0.880328	-0.459033	0.392975	-0.830762	0.729599	-0.845724	-0.91892	-0.878102	0.833061	-0.848705	-0.734388	-1.00264	0.878499	-0.53036	0.235259	-0.829835	0.742524	-0.835651	-0.915529	-0.87879	0.841037	-0.866466
9	34	uniform cytoplasm	0.423828	-0.96472	0.132141	0.155238	0.658812	-0.79059	1.14328	1.03102	0.990354	-0.913874	0.839998	0.327322	1.02247	-0.850434	0.12201	0.286549	0.909464	-0.595214	1.22239	0.976688	0.901875	-0.743434	0.695659	0.104155	1.04574	-0.810626	0.143061	0.400421	0.887866	-0.53221	1.16723	0.942412	0.858561	-0.677966	0.653454	-0.0375374	1.03062	-0.800118	0.202981	0.503823	0.894522	-0.550207	1.14467	0.933079	0.859397	-0.680245	0.677886
9	35	uniform cytoplasm	0.292209	-0.655454	0.396733	0.10952	1.23717	-0.703392	1.26124	0.828586	0.838594	-0.734253	0.830538	0.511138	1.01523	-0.580299	0.22673	0.292109	1.49057	-0.512803	1.27537	0.775518	0.738793	-0.609983	0.677546	0.265	1.07691	-0.556607	0.241744	0.458311	1.50475	-0.453062	1.23201	0.752551	0.700076	-0.561913	0.635429	0.103252	1.08294	-0.559946	0.363107	0.579097	1.58476	-0.490404	1.24336	0.75951	0.716077	-0.583685	0.681647
9	36	ER	0.178975	-0.34592	-0.294633	0.534276	0.520172	0.188466	0.652351	0.421015	0.249955	0.0137793	-0.0973095	-0.651462	1.01281	-0.273757	-0.138269	0.408495	0.353406	-0.0278808	0.475679	0.374203	0.288721	-0.135955	0.136225	-0.263032	0.811346	-0.263342	0.0518627	0.281665	0.296516	-0.181656	0.418864	0.365985	0.327216	-0.242158	0.299108	0.0224545	0.67551	-0.280394	0.285355	0.128023	0.249837	-0.297049	0.379175	0.379229	0.366178	-0.323367	0.42281
9	37	nucleoli	0.351255	1.0419	-0.366549	0.376864	-0.52432	0.829651	-0.902351	-1.12709	-1.06023	0.96749	-0.974718	-0.453909	-1.83036	0.997514	-0.176758	-0.319346	-0.618056	0.757073	-0.882404	-1.06865	-0.999755	0.906168	-0.902799	0.15368	-1.87564	0.971595	0.048305	-1.5344	-0.651881	0.753923	-0.869482	-1.03478	-0.974169	0.895376	-0.897878	0.540737	-1.85373	0.963412	0.357339	-2.92295	-0.679003	0.772431	-0.862569	-1.02198	-0.971397	0.907398	-0.919846
9	38	mitochondria	0.152701	0.30187	-0.294135	0.169656	-0.547168	0.302327	-0.450292	-0.26096	-0.277988	0.286945	-0.240216	0.025445	0.16582	0.278787	-0.204982	-0.056397	-0.548651	0.236085	-0.445863	-0.236508	-0.237144	0.228897	-0.164061	0.287691	0.0842082	0.257793	-0.146779	-0.332119	-0.553405	0.183243	-0.445731	-0.220437	-0.213533	0.185093	-0.103466	0.515724	0.00409361	0.235526	-0.0885535	-0.579711	-0.565511	0.140931	-0.44945	-0.205073	-0.194506	0.146859	-0.050813
9	39	Golgi	0.344654	-1.04593	1.25335	-1.45466	0.158305	-1.36331	0.606116	1.12196	1.19802	-1.2496	1.39773	1.56513	0.418381	-1.22459	0.926544	-1.14564	0.199344	-1.43999	0.666799	1.25194	1.30525	-1.41597	1.47035	1.5644	0.604533	-1.28135	0.826407	-0.814205	0.248681	-1.44171	0.704381	1.28909	1.32478	-1.45337	1.46458	1.48963	0.75094	-1.29213	0.703691	-0.379356	0.255995	-1.39519	0.700776	1.28126	1.30435	-1.43725	1.41181
9	40	nucleoli	0.196612	0.944622	-0.464145	0.403675	-0.958284	0.809103	-1.03371	-1.05088	-0.998584	0.905174	-0.941546	-0.599033	-1.73358	0.924546	-0.408981	-0.00200256	-0.967823	0.764626	-0.988295	-1.02166	-0.96649	0.88067	-0.912375	-0.23821	-1.75787	0.914489	-0.431297	-0.764527	-0.962057	0.779066	-0.966169	-1.00916	-0.961117	0.894695	-0.943012	-0.035904	-1.75961	0.91233	-0.462814	-1.67456	-0.955078	0.807571	-0.949953	-1.00405	-0.964213	0.917898	-0.981813
9	41	Golgi	0.131551	-0.0629686	-0.149267	-0.0477158	-0.330528	-0.0500866	-0.169518	0.117448	0.1051	-0.0984214	0.142456	0.355338	0.461366	-0.0548047	-0.182482	0.062492	-0.302053	0.0179815	-0.164914	0.105872	0.0765179	-0.0644558	0.0883731	0.245601	0.507183	-0.0449191	-0.215961	0.158479	-0.300987	0.0433372	-0.170024	0.0932231	0.0600276	-0.0428204	0.0648443	0.142559	0.51994	-0.0386824	-0.246905	0.223647	-0.297514	0.0500107	-0.174327	0.0833908	0.0524968	-0.0363644	0.0627213
9	42	nucleoplasm and cytoplasm	0.310612	0.223265	-0.31398	0.335995	-0.48552	0.244701	-0.395668	-0.240756	-0.245628	0.221162	-0.250503	-0.320394	-0.17519	0.242712	-0.312503	0.41561	-0.491132	0.302923	-0.393161	-0.255343	-0.273972	0.27141	-0.309346	-0.504077	-0.157084	0.251173	-0.364373	0.532033	-0.500982	0.330973	-0.401034	-0.264792	-0.288735	0.299749	-0.345973	-0.649535	-0.153416	0.253675	-0.428913	0.577619	-0.505291	0.340894	-0.406472	-0.269847	-0.293819	0.307411	-0.361078
9	43	mitochondria	0.489946	-0.722911	0.801463	-1.63492	-0.302217	-0.905206	0.017976	0.711879	0.745743	-0.869909	0.966319	1.48266	0.107416	-0.934395	0.630804	-1.61141	-0.304879	-1.08025	0.0630092	0.84854	0.888333	-1.08759	1.11482	1.56987	0.229665	-1.0286	0.559733	-1.49796	-0.288635	-1.16305	0.099079	0.911859	0.954419	-1.19023	1.18701	1.64049	0.365182	-1.0646	0.525614	-1.14794	-0.256774	-1.17001	0.124724	0.928533	0.970666	-1.21686	1.19735
9	44	nucleoplasm and cytoplasm	0.21516	0.311061	-0.22342	0.535363	1.09165	0.303585	0.411243	-0.210982	-0.225898	0.292051	-0.244008	-0.409767	0.343817	0.350999	-0.237895	0.62488	1.12125	0.389751	0.355391	-0.24982	-0.284326	0.37683	-0.345977	-0.748713	0.374118	0.357875	-0.255037	0.799119	1.11967	0.422122	0.336216	-0.254622	-0.29473	0.407852	-0.384106	-0.994432	0.377542	0.363304	-0.308096	0.944458	1.12099	0.426057	0.321652	-0.260019	-0.299462	0.409982	-0.387407
9	45	nucleoli and cytoplasm	0.37442	0.335207	-0.316585	0.228799	-0.274691	0.325775	-0.378355	-0.324163	-0.335098	0.315825	-0.304451	-0.177647	0.0100347	0.310727	-0.302615	0.299125	-0.265285	0.325983	-0.379566	-0.317092	-0.330061	0.306039	-0.313974	-0.257782	0.0205009	0.314999	-0.3359	0.441244	-0.259962	0.343594	-0.38238	-0.325276	-0.338726	0.319864	-0.334563	-0.30754	0.0191309	0.318091	-0.374359	0.523742	-0.261593	0.365541	-0.384017	-0.330393	-0.345692	0.333037	-0.352251
9	47	structured cytoplasm	0.415211	-0.900719	0.607048	-0.216161	0.939356	-0.984404	1.22761	1.02174	1.05823	-0.987993	1.04996	0.741188	0.921363	-0.841256	0.506625	0.0433218	1.37654	-0.847069	1.4086	1.02021	1.01306	-0.899809	0.9637	0.572983	1.01149	-0.824098	0.431943	0.246662	1.3309	-0.766085	1.34646	1.0019	0.968803	-0.849714	0.901223	0.397551	1.04551	-0.82152	0.480558	0.412931	1.38303	-0.766877	1.34547	1.0015	0.967969	-0.847601	0.909731
9	48	ER	0.105084	0.211719	-0.253554	-0.142431	-0.565414	0.223822	-0.485621	-0.210227	-0.221194	0.193946	-0.160996	0.416884	-0.0399625	0.164635	-0.238325	-0.0367058	-0.511786	0.186513	-0.439904	-0.183141	-0.194532	0.128136	-0.109534	0.475666	-0.0271223	0.164305	-0.213033	-0.0354525	-0.462343	0.163355	-0.400416	-0.182813	-0.188271	0.108746	-0.0832417	0.538055	-0.03895	0.173809	-0.184267	-0.041786	-0.424661	0.157223	-0.379995	-0.191869	-0.192579	0.10666	-0.07201
10	1	nucleoplasm	0.0803382	0.712104	-0.392385	0.565855	-0.0326137	0.630575	-0.393654	-0.697225	-0.679954	0.677959	-0.647072	-0.618982	-0.266277	0.71559	-0.340614	0.574258	-0.0530739	0.634917	-0.401832	-0.701576	-0.686043	0.697265	-0.67399	-0.812742	-0.274623	0.710404	-0.297588	0.604187	0.039197	0.632777	-0.367801	-0.691598	-0.677249	0.698227	-0.674036	-0.870365	-0.300543	0.708928	-0.249841	0.590703	0.0745581	0.636041	-0.354533	-0.686434	-0.673594	0.701054	-0.674364
10	2	structured cytoplasm	0.264974	-0.0335257	-0.300078	0.48534	0.132857	0.222838	0.180719	0.113068	0.0231274	0.114835	-0.128048	-0.460334	0.831585	0.0269823	-0.264142	0.48077	0.0518983	0.241846	0.0927287	0.0595387	-0.0159632	0.164108	-0.153185	-0.485893	0.755275	0.0432357	-0.231883	0.50522	0.0384633	0.192672	0.0690008	0.0447205	-0.00993103	0.127988	-0.0940106	-0.42012	0.668229	0.0399957	-0.201834	0.493257	0.0306056	0.142034	0.0559805	0.0471111	0.00702606	0.0852875	-0.0326593
10	3	nucleoli and cytoplasm	0.206951	-0.281247	-0.214634	0.451057	0.598433	-0.0313028	0.650425	0.392954	0.30597	-0.172225	0.148193	-0.243969	0.969982	-0.198983	-0.176843	0.460517	0.516471	0.0460301	0.527098	0.319504	0.237393	-0.0723634	0.0760203	-0.333496	0.913157	-0.173789	-0.0864488	0.473251	0.480149	0.000938847	0.481056	0.295029	0.235782	-0.0915286	0.133134	-0.278965	0.830282	-0.171317	-0.0036145	0.498282	0.462911	-0.0631791	0.457781	0.292356	0.251965	-0.135273	0.206492
10	4	cytoskeleton	0.314363	-0.887411	1.00727	-1.8562	-0.138678	-1.15224	0.213151	0.885678	0.939876	-1.07799	1.18639	1.67752	0.122333	-1.1797	1.23846	-1.61243	0.145353	-1.52998	0.552298	1.205	1.28555	-1.42135	1.54734	1.76156	0.385332	-1.26074	1.00516	-1.25145	0.119669	-1.53545	0.543347	1.24682	1.31435	-1.47471	1.53133	1.6816	0.579993	-1.26588	0.763814	-0.708572	0.0672283	-1.46074	0.504655	1.22652	1.27604	-1.44302	1.43986
10	5	cytoskeleton	0.279015	-0.805457	0.885692	-0.41978	0.685762	-0.904429	1.01266	0.880315	0.910365	-0.867242	0.909815	0.508212	0.520887	-0.80947	0.870682	-0.320254	0.844545	-0.901954	1.08574	0.903799	0.930314	-0.84965	0.903733	0.41474	0.572787	-0.826276	0.885416	-0.146348	0.875126	-0.933969	1.10132	0.925618	0.956159	-0.869033	0.927421	0.361601	0.616531	-0.827304	0.824867	0.0745055	0.855609	-0.939752	1.0688	0.918656	0.949219	-0.874576	0.922572
10	6	nucleoplasm	0.17796	0.873635	-0.417892	0.5814	-0.154783	0.746277	-0.58684	-0.895188	-0.861173	0.827509	-0.821864	-0.825407	-0.784387	0.86015	-0.353131	0.546417	-0.176777	0.716978	-0.579578	-0.880547	-0.844252	0.814483	-0.811117	-0.928381	-0.803882	0.850185	-0.330405	0.530573	-0.180609	0.716619	-0.572167	-0.868024	-0.83384	0.812695	-0.81649	-0.947586	-0.821729	0.850292	-0.339108	0.625106	-0.160734	0.728531	-0.56075	-0.865803	-0.834812	0.821502	-0.832046
10	7	structured cytoplasm	0.16709	-0.866415	0.946218	-0.598599	0.387948	-1.01299	0.783119	0.887968	0.95314	-0.961564	1.0053	0.727519	0.487116	-0.83989	0.622787	-0.36749	0.532829	-0.890589	0.848843	0.870482	0.898986	-0.886496	0.894859	0.550011	0.574961	-0.829033	0.446838	-0.0989723	0.490398	-0.799994	0.808835	0.854296	0.853039	-0.826957	0.803257	0.33491	0.650056	-0.831481	0.402604	0.190885	0.571134	-0.789287	0.858433	0.869713	0.85909	-0.815397	0.784274
10	8	ER	0.294975	-0.0619657	-0.111752	-0.239778	-0.480739	-0.0757666	-0.336657	0.0278442	0.0236707	-0.103097	0.103346	0.482647	0.0272426	-0.0943539	-0.106781	-0.321138	-0.470529	-0.0933383	-0.335007	0.0217024	0.0265563	-0.146633	0.122535	0.597783	-0.0223167	-0.0926555	-0.0837261	-0.388666	-0.46533	-0.09145	-0.336943	0.0078492	0.0165963	-0.146442	0.123643	0.705039	-0.0489477	-0.089974	-0.0423905	-0.431157	-0.457904	-0.0840405	-0.334965	0.00193192	0.011311	-0.139374	0.126329
10	9	plasma membrane	0.0717877	0.203859	-0.347779	0.513117	0.0961436	0.348966	0.00144919	-0.147278	-0.19777	0.282999	-0.284636	-0.492373	0.5121	0.261802	-0.330334	0.578552	0.0816558	0.416556	-0.041906	-0.204061	-0.257937	0.376195	-0.372159	-0.726057	0.492936	0.274577	-0.326209	0.689841	0.165795	0.407753	-0.0194938	-0.212365	-0.258312	0.378808	-0.363067	-0.818465	0.450607	0.278297	-0.338762	0.744717	0.164457	0.382694	-0.0266444	-0.215076	-0.252364	0.356138	-0.331563
10	10	nucleoplasm	0.481759	0.380916	-0.392857	0.610196	0.329336	0.555565	0.0468847	-0.330806	-0.393302	0.518254	-0.540232	-0.882122	0.39166	0.419352	-0.298525	0.567153	0.196832	0.479696	-0.0483736	-0.37021	-0.399337	0.479982	-0.45663	-0.742737	0.245884	0.423274	-0.215883	0.559308	0.189622	0.417239	-0.0609579	-0.370395	-0.379731	0.432077	-0.380592	-0.584511	0.143632	0.420216	-0.121302	0.498726	0.167521	0.37697	-0.075703	-0.3655	-0.365634	0.402072	-0.330474
10	11	ER	0.290054	-0.833949	1.12422	-0.723339	0.084097	-1.18909	0.676172	0.856137	0.974148	-0.988731	1.04598	1.04882	0.086858	-0.850509	0.627361	-0.522209	0.000520177	-1.08267	0.636629	0.842687	0.923475	-0.974489	0.960102	1.03849	0.168993	-0.824017	0.542066	-0.282111	0.0782656	-0.994569	0.703394	0.824903	0.881935	-0.914256	0.877501	0.930843	0.243656	-0.810599	0.34254	0.0105411	0.0719501	-0.913394	0.690225	0.808531	0.841939	-0.867075	0.794121
10	12	nucleoplasm and cytoplasm	0.197953	-0.194689	-0.0456858	0.333324	0.808183	-0.15318	0.695343	0.327529	0.299985	-0.215142	0.272419	0.115782	0.75274	-0.136532	-0.0851845	0.441734	0.971934	-0.0094822	0.686755	0.284138	0.228164	-0.102905	0.143601	-0.138984	0.799537	-0.113247	-0.0862064	0.585527	0.905028	0.0557624	0.625975	0.257506	0.191072	-0.0366551	0.0827796	-0.339678	0.796798	-0.110286	-0.0909744	0.696215	0.866715	0.0600277	0.591489	0.251684	0.187565	-0.0269411	0.0795996
10	13	ERGIC	0.746442	0.63393	-0.0936471	0.0787816	-0.285587	0.426604	-0.485261	-0.59916	-0.545268	0.5253	-0.425136	0.101988	-0.627844	0.580257	-0.19363	0.358247	-0.133409	0.398193	-0.407236	-0.547214	-0.51066	0.469647	-0.401387	-0.0406538	-0.530633	0.562859	-0.306058	0.583997	-0.154559	0.43492	-0.413223	-0.542103	-0.519679	0.47644	-0.445443	-0.216301	-0.474071	0.564577	-0.367879	0.700418	-0.0674898	0.464796	-0.381603	-0.54554	-0.529425	0.495884	-0.479974
10	14	ER	0.102013	0.578939	-0.404959	0.56223	-0.21449	0.609543	-0.388542	-0.55035	-0.572439	0.621081	-0.618172	-0.744834	-0.0654509	0.582522	-0.334356	0.515345	-0.269931	0.537529	-0.414284	-0.549432	-0.550404	0.576345	-0.549352	-0.606785	-0.155115	0.579036	-0.315082	0.500959	-0.282153	0.499859	-0.417413	-0.544773	-0.534944	0.547842	-0.510073	-0.468891	-0.234086	0.573724	-0.296188	0.435213	-0.282014	0.480075	-0.413534	-0.537278	-0.523299	0.533424	-0.487537
10	15	ER	0.264317	0.39201	-0.405373	0.337318	-0.547414	0.484757	-0.626743	-0.524181	-0.523529	0.45008	-0.517596	-0.305594	-0.379373	0.432287	-0.361576	0.330218	-0.580639	0.506026	-0.626512	-0.551162	-0.549289	0.505002	-0.543925	-0.317716	-0.37138	0.454917	-0.37608	0.312371	-0.574171	0.522674	-0.61788	-0.564911	-0.563273	0.536853	-0.563028	-0.302505	-0.405239	0.473082	-0.401187	0.250155	-0.568324	0.552832	-0.613127	-0.57662	-0.577595	0.577052	-0.592604
10	16	structured cytoplasm	0.255969	-0.847432	0.756432	-1.13767	-0.111257	-1.06869	0.271814	0.85666	0.906244	-1.00603	1.07114	1.25376	0.204502	-1.01504	0.577844	-0.891311	-0.0534403	-1.15999	0.344621	0.985611	1.01957	-1.16057	1.15601	1.21431	0.362664	-1.06189	0.41381	-0.579912	-0.0631951	-1.11825	0.325735	0.997471	1.01136	-1.16251	1.09914	1.05845	0.50778	-1.07249	0.237504	-0.166825	-0.0772012	-1.0529	0.307452	0.985375	0.983951	-1.13161	1.02017
10	17	nucleoli	0.142648	0.789128	-0.397506	0.23719	-0.797767	0.632333	-0.926188	-0.915017	-0.855034	0.719153	-0.768652	-0.356857	-1.7536	0.754892	-0.327885	-0.161127	-0.840974	0.595799	-0.897335	-0.879176	-0.821071	0.682814	-0.735518	0.10255	-1.77187	0.74383	-0.308855	-0.855251	-0.851503	0.624589	-0.883279	-0.865343	-0.818295	0.702388	-0.770277	0.351319	-1.73597	0.744493	-0.280041	-1.71404	-0.859782	0.66841	-0.875095	-0.863372	-0.828468	0.735946	-0.820893
10	18	nucleoli	0.524717	-0.40232	-0.379178	-0.740519	-0.943641	-0.0376663	-0.837969	-0.0336168	-0.0528957	-0.312734	0.0414083	1.29101	-0.756429	-0.255371	-0.372975	-0.767814	-0.953065	0.109682	-0.835884	-0.18858	-0.210666	-0.13735	-0.113755	1.31007	-0.789102	-0.156608	-0.438302	-0.842387	-0.948053	0.227191	-0.833217	-0.266329	-0.299927	0.00287949	-0.234968	1.24679	-0.730627	-0.0454693	-0.537129	-0.916214	-0.950235	0.340968	-0.836827	-0.340225	-0.381133	0.148044	-0.353396
10	19	nucleoli	0.267793	0.99092	-0.465347	0.367596	-0.980486	0.820432	-1.07639	-1.11765	-1.05554	0.914094	-0.96336	-0.174568	-2.18441	1.02536	-0.410785	-0.0972493	-0.995564	0.806466	-1.0325	-1.12473	-1.05518	0.946002	-0.98572	-0.12774	-2.1616	1.01704	-0.436915	-1.03499	-0.992432	0.82223	-1.00953	-1.11355	-1.05122	0.959642	-1.02209	-0.0493227	-2.13781	1.01366	-0.484155	-2.14616	-0.991186	0.852744	-0.995173	-1.10699	-1.05385	0.980485	-1.06432
10	20	ER	0.1495	-0.155881	0.208866	-0.60427	-0.292216	-0.339636	-0.18478	0.150796	0.187587	-0.284452	0.336988	0.683204	-0.223598	-0.285332	0.0600903	-0.438289	-0.289917	-0.389572	-0.175158	0.223697	0.249443	-0.399303	0.375137	0.65198	-0.12315	-0.30347	-0.0198061	-0.232357	-0.282786	-0.359001	-0.173266	0.222446	0.237397	-0.39202	0.334012	0.563452	-0.0431224	-0.304268	-0.146183	0.0217731	-0.303671	-0.296393	-0.194855	0.204616	0.209496	-0.357978	0.268964
10	21	nucleoplasm	0.817371	0.399842	-0.203923	0.628703	4.94419	0.59733	1.39487	-0.371369	-0.427198	0.615102	-0.597598	-1.03514	0.348777	0.437595	0.0538197	0.602952	4.05236	0.505027	1.06246	-0.398975	-0.42204	0.564616	-0.48242	-0.841074	0.193904	0.43146	0.490002	0.600665	3.69374	0.449011	0.947255	-0.377272	-0.384858	0.516558	-0.402729	-0.685561	0.121704	0.430896	1.11965	0.542091	3.45579	0.416546	0.873002	-0.36956	-0.371489	0.493788	-0.353022
10	22	uniform cytoplasm	0.555502	0.0471845	-0.298037	0.454768	0.188031	0.229792	0.12606	0.0372384	-0.0315212	0.134062	-0.120131	-0.330119	0.774987	0.104384	-0.271395	0.481817	0.149168	0.28855	0.0655322	-0.0144732	-0.0814034	0.219774	-0.192328	-0.475483	0.744955	0.120792	-0.244149	0.515771	0.116006	0.276435	0.0336432	-0.0318928	-0.0858909	0.218893	-0.174615	-0.510185	0.68436	0.119214	-0.214815	0.533557	0.106859	0.250079	0.0192245	-0.0322107	-0.0753443	0.196475	-0.138931
10	23	vesicles	0.423698	0.272206	-0.153389	-0.0345833	-0.359991	0.182334	-0.30915	-0.205389	-0.187063	0.197268	-0.101584	0.280129	0.187456	0.270723	-0.174626	0.108207	-0.286204	0.203249	-0.257582	-0.197727	-0.190745	0.199774	-0.115621	0.189488	0.247383	0.268995	-0.166854	0.163864	-0.226711	0.207477	-0.227098	-0.193206	-0.189905	0.203756	-0.11772	0.122511	0.261788	0.26784	-0.173	0.199389	-0.225931	0.209645	-0.22735	-0.193945	-0.191395	0.206781	-0.118112
10	24	mitochondria	0.551389	0.146653	0.181853	0.468251	3.65135	0.249605	1.33563	-0.0353268	-0.0866069	0.249068	-0.14843	-0.302658	0.547418	0.14624	0.735622	0.165338	2.90774	0.0363734	1.00886	-0.00993746	-0.00751401	0.113826	0.0936791	0.260698	0.333603	0.108494	1.5275	-0.169134	2.59702	-0.0743403	0.893992	0.0438579	0.072721	0.0252461	0.23826	0.638888	0.227705	0.0749203	2.51207	-0.469202	2.38588	-0.153227	0.819574	0.0791842	0.114309	-0.0333958	0.342119
10	25	cytoskeleton	0.137431	-0.139262	-0.311728	0.389153	-0.265612	0.157307	-0.013635	0.146088	0.0704522	0.0345626	-0.0822686	-0.395648	0.762659	-0.0450124	-0.285628	0.388356	-0.270379	0.235005	-0.0498921	0.0585292	-0.0113475	0.143918	-0.17008	-0.558723	0.696631	-0.0218352	-0.274771	0.419722	-0.202117	0.218948	-0.0221785	0.0439109	-0.0153913	0.138956	-0.1496	-0.644938	0.654451	-0.00945356	-0.301393	0.481635	-0.0979833	0.196249	0.0168261	0.0371102	-0.0139098	0.124332	-0.124442
10	26	nucleoplasm	0.532028	-0.914586	0.459255	-2.03967	-0.542175	-1.12407	-0.157118	0.74944	0.796309	-1.08888	1.05864	1.57582	-0.28789	-1.16155	0.280453	-2.16015	-0.577776	-1.25738	-0.149195	0.859148	0.91484	-1.30467	1.14471	1.63738	-0.144848	-1.16594	0.0994881	-1.95086	-0.621381	-1.14183	-0.198125	0.810528	0.846602	-1.24558	1.01606	1.56943	0.0283271	-1.18045	-0.0314954	-1.41012	-0.625976	-1.0436	-0.200346	0.802379	0.820963	-1.19559	0.925438
10	27	nucleoli	0.173591	0.795549	-0.440532	0.452455	-0.803806	0.694054	-0.817805	-0.822482	-0.794893	0.758091	-0.748249	-0.627095	-0.655962	0.783617	-0.407565	0.46105	-0.802451	0.677903	-0.784799	-0.80804	-0.781185	0.753637	-0.753538	-0.760616	-0.652854	0.776836	-0.456177	0.481487	-0.787384	0.680004	-0.764986	-0.800434	-0.776319	0.756274	-0.766334	-0.811984	-0.67792	0.772789	-0.501962	0.388734	-0.742273	0.679919	-0.730807	-0.790008	-0.767669	0.754167	-0.764698
10	28	structured cytoplasm	0.487532	0.105743	-0.205108	0.446539	0.687464	0.143715	0.430072	-0.00524481	-0.0291601	0.0982103	-0.0571257	-0.205314	0.498437	0.159915	-0.217752	0.513559	0.641861	0.244015	0.34587	-0.0575757	-0.0979627	0.193112	-0.162612	-0.448267	0.508824	0.174117	-0.180782	0.601431	0.664606	0.242558	0.335263	-0.0686888	-0.105338	0.203644	-0.157128	-0.524778	0.474016	0.173627	-0.152375	0.672035	0.633839	0.212277	0.310928	-0.0683856	-0.0963727	0.183363	-0.121056
10	29	nucleoplasm and cytoplasm	0.326716	-1.06349	0.374127	-1.74633	-0.501217	-1.19117	-0.0949267	0.915732	0.940231	-1.21504	1.16819	1.77895	0.0139012	-1.26169	0.185101	-1.69924	-0.543881	-1.22085	-0.127922	0.974436	0.993435	-1.3779	1.20165	1.91212	0.115063	-1.27455	0.0697799	-1.42688	-0.556343	-1.14459	-0.136407	0.9534	0.957074	-1.34476	1.12026	1.86967	0.283629	-1.27472	-0.0589052	-0.917961	-0.555681	-1.04768	-0.138793	0.933167	0.920804	-1.29293	1.03368
10	30	mitochondria	0.310318	0.596563	-0.381031	0.0729584	-0.77727	0.531848	-0.777595	-0.642888	-0.626226	0.550095	-0.539191	0.106655	-0.660695	0.607243	-0.281825	-0.344869	-0.768368	0.48507	-0.74976	-0.644883	-0.610966	0.522235	-0.489362	0.477584	-0.763256	0.616643	-0.223384	-0.878365	-0.750704	0.478157	-0.729072	-0.643248	-0.608615	0.528721	-0.481359	0.706761	-0.80794	0.633366	-0.192162	-1.23631	-0.738272	0.494578	-0.716499	-0.648018	-0.615648	0.555444	-0.499215
10	31	cytoskeleton	0.184775	-1.21903	0.0498377	0.325344	1.03252	-0.826517	1.8346	1.24757	1.14028	-0.985178	0.773684	0.0506519	0.985875	-1.05865	0.074746	0.306367	0.886498	-0.612251	1.5687	1.13831	1.00826	-0.770744	0.638475	-0.0256584	0.929312	-1.0132	0.214324	0.298514	0.812113	-0.655482	1.45711	1.10299	0.999599	-0.7753	0.698552	0.0395285	0.86477	-1.0173	0.413226	0.288747	0.825119	-0.776667	1.43507	1.11263	1.03824	-0.850369	0.813392
10	32	focal	0.0852438	-1.01447	0.0181572	-0.728519	-0.456534	-0.831471	0.0646772	0.918766	0.903707	-1.00315	0.88823	0.966559	0.774819	-0.967567	0.0133548	-0.734251	-0.445076	-0.697573	0.0799816	0.875665	0.838582	-0.91351	0.812311	0.980021	0.778621	-0.974776	0.156842	-0.92308	-0.348639	-0.723268	0.167536	0.904761	0.873008	-0.924185	0.870318	1.0107	0.806904	-0.992346	0.300639	-0.994915	-0.313132	-0.760172	0.200079	0.923595	0.898774	-0.951049	0.927324
10	33	nucleoli	0.192196	0.382117	-0.420189	0.12076	-0.771739	0.430966	-0.797516	-0.563741	-0.548738	0.387227	-0.492738	-0.0411052	-0.768652	0.433807	-0.390609	0.156616	-0.784884	0.460469	-0.783624	-0.612627	-0.593858	0.437358	-0.534839	0.00128742	-0.794355	0.474974	-0.432653	0.142676	-0.787398	0.500485	-0.777356	-0.641845	-0.627048	0.487986	-0.581736	0.0232876	-0.804683	0.511731	-0.490131	0.0318295	-0.791703	0.543547	-0.773931	-0.663963	-0.653674	0.541692	-0.628733
10	34	uniform cytoplasm	0.0709603	-0.18337	-0.298351	0.529325	0.482087	0.143561	0.542347	0.265551	0.16041	-0.00151977	-0.0608553	-0.502136	0.738309	-0.0982182	-0.252012	0.536654	0.386819	0.205339	0.416716	0.190534	0.0954077	0.104673	-0.124286	-0.591892	0.667682	-0.0772068	-0.181638	0.563543	0.36976	0.150743	0.383504	0.173191	0.10211	0.0749884	-0.0578685	-0.538307	0.589329	-0.0776189	-0.104159	0.535257	0.320735	0.079367	0.343386	0.171971	0.121136	0.0193872	0.0229073
10	35	uniform cytoplasm	0.232963	0.248658	-0.187265	0.33833	0.251268	0.21054	0.0952224	-0.160861	-0.161932	0.207155	-0.134196	-0.0902287	0.32297	0.279323	-0.203622	0.429972	0.32139	0.2826	0.0895555	-0.185855	-0.202135	0.265524	-0.209462	-0.308614	0.369257	0.287482	-0.184818	0.518311	0.341948	0.298783	0.0854753	-0.192923	-0.211367	0.285561	-0.225313	-0.437515	0.357477	0.287585	-0.182071	0.644823	0.348861	0.288048	0.0803481	-0.192764	-0.207111	0.280345	-0.212852
10	36	ER	0.0614063	0.305737	-0.378698	0.568085	-0.0119059	0.501967	-0.0760901	-0.272587	-0.340967	0.460891	-0.496739	-0.850258	0.243697	0.335221	-0.295293	0.50692	-0.129146	0.389359	-0.159904	-0.291864	-0.31874	0.385315	-0.381091	-0.633664	0.111287	0.337648	-0.235301	0.468881	-0.139644	0.318218	-0.169832	-0.29082	-0.29696	0.333441	-0.305305	-0.471501	0.0198149	0.331577	-0.191892	0.427129	-0.163977	0.274742	-0.183617	-0.28462	-0.280565	0.30264	-0.259179
10	37	nucleoli	0.383788	0.811058	-0.282029	0.23878	-0.411656	0.63035	-0.72375	-0.84978	-0.801008	0.739464	-0.715785	-0.441872	-1.2515	0.736279	-0.242347	0.159615	-0.477962	0.543082	-0.704566	-0.780533	-0.731819	0.639255	-0.623575	-0.110211	-1.26866	0.715653	-0.215339	-0.0585352	-0.50395	0.548214	-0.699453	-0.764964	-0.722612	0.629475	-0.633136	0.0277314	-1.24547	0.718491	-0.175561	-0.371649	-0.531553	0.581038	-0.702026	-0.769994	-0.734629	0.651437	-0.672562
10	38	mitochondria	0.272711	-0.0175396	-0.117536	-0.0505542	-0.373845	-0.0564462	-0.204646	0.0537434	0.0521585	-0.0726734	0.107674	0.361351	0.19862	-0.0509674	-0.0762568	-0.188969	-0.375989	-0.0792269	-0.210988	0.077139	0.0790183	-0.11693	0.150061	0.518467	0.173627	-0.062884	-0.0202719	-0.392023	-0.392168	-0.0996462	-0.22733	0.0787184	0.084186	-0.136382	0.181164	0.66943	0.129212	-0.0849108	0.0956062	-0.544749	-0.354652	-0.145278	-0.201917	0.099375	0.111057	-0.171869	0.239408
10	39	Golgi	0.759976	0.21003	-0.342402	0.187474	-0.719465	0.240405	-0.615621	-0.324742	-0.310969	0.234654	-0.324155	-0.129747	-0.558184	0.240634	-0.337931	0.214057	-0.735961	0.311653	-0.612131	-0.349145	-0.351396	0.298505	-0.382199	-0.191136	-0.543091	0.254032	-0.381051	0.224183	-0.723127	0.35457	-0.601472	-0.3574	-0.368851	0.338255	-0.424603	-0.276566	-0.522651	0.261946	-0.448655	0.174097	-0.726911	0.390654	-0.595779	-0.363433	-0.380559	0.368221	-0.459679
10	40	nucleoli	0.255778	0.249457	-0.440942	-0.333845	-1.00289	0.414198	-1.01379	-0.593913	-0.58735	0.243457	-0.456338	1.1836	-1.75893	0.561431	-0.402341	-0.610003	-1.0108	0.564163	-0.995468	-0.774138	-0.749218	0.517712	-0.625835	1.21897	-1.75885	0.718973	-0.444777	-1.25627	-1.00516	0.679555	-0.9849	-0.868343	-0.841538	0.701048	-0.782152	0.961695	-1.68281	0.810048	-0.510618	-2.12814	-1.00317	0.765236	-0.977795	-0.928531	-0.903308	0.818779	-0.903145
10	41	Golgi	0.139285	-0.0786682	-0.0961761	-0.366322	-0.388398	-0.121674	-0.217337	0.129045	0.124209	-0.15554	0.220971	0.744798	0.245481	-0.136406	-0.153444	-0.184441	-0.385791	-0.0925699	-0.220051	0.153982	0.131243	-0.195353	0.214653	0.698453	0.322352	-0.123134	-0.188018	-0.0274145	-0.352765	-0.0555813	-0.210176	0.132927	0.105992	-0.170168	0.180855	0.617859	0.361442	-0.126303	-0.215209	0.0937715	-0.343124	-0.0476625	-0.209189	0.12691	0.101141	-0.168728	0.178727
10	42	nucleoplasm and cytoplasm	0.245818	0.497293	-0.322319	0.371942	-0.191963	0.474162	-0.391941	-0.480034	-0.477022	0.48617	-0.448143	-0.278592	-0.051945	0.515952	-0.312107	0.439882	-0.162871	0.513749	-0.384544	-0.497475	-0.503923	0.536757	-0.508646	-0.515733	-0.0142407	0.520835	-0.35529	0.571228	-0.16936	0.538454	-0.385908	-0.502726	-0.51386	0.563399	-0.546434	-0.708018	-0.00953697	0.524276	-0.402855	0.61251	-0.166396	0.549759	-0.384272	-0.505154	-0.517862	0.572788	-0.561725
10	43	mitochondria	0.355423	-0.736519	0.417957	-0.733581	-0.1271	-0.855698	0.26221	0.794375	0.812914	-0.859356	0.919727	1.13455	0.540324	-0.842034	0.385617	-0.733422	-0.0748691	-0.909774	0.294748	0.8711	0.884924	-0.974577	1.00536	1.24814	0.593722	-0.870638	0.519687	-0.796042	-0.00666948	-0.956375	0.329203	0.892022	0.912889	-1.01825	1.06972	1.33642	0.625237	-0.89023	0.664306	-0.742367	0.0214826	-0.979866	0.341191	0.90002	0.926663	-1.04074	1.11049
10	44	nucleoplasm and cytoplasm	0.131228	-0.524081	0.113403	0.272824	1.66415	-0.442143	1.33267	0.667881	0.632434	-0.529176	0.561395	0.210443	0.949143	-0.440576	0.00175689	0.405964	1.86757	-0.240555	1.28403	0.587272	0.511597	-0.371652	0.375809	-0.0865507	0.980068	-0.406979	-0.0237954	0.602667	1.8772	-0.161848	1.23527	0.552954	0.463577	-0.300703	0.305542	-0.318917	0.983613	-0.39852	-0.0191596	0.750516	1.86371	-0.151386	1.199	0.540905	0.452593	-0.288886	0.300655
10	45	nucleoli and cytoplasm	0.252369	0.472523	-0.401213	0.590537	0.0708089	0.561289	-0.168185	-0.414337	-0.454661	0.541078	-0.539962	-0.795589	0.317396	0.500315	-0.341909	0.588101	-0.015455	0.535658	-0.224616	-0.444434	-0.467757	0.550528	-0.526792	-0.806826	0.229633	0.504614	-0.32214	0.629629	-0.0363463	0.498522	-0.236378	-0.448053	-0.457303	0.522916	-0.483059	-0.722554	0.139359	0.501803	-0.299135	0.590675	-0.0649301	0.471594	-0.250076	-0.444724	-0.446863	0.499659	-0.446772
10	47	structured cytoplasm	0.177338	0.0304902	-0.144417	-0.266295	-0.57097	-0.0100279	-0.435708	-0.0185495	-0.0124278	-0.0359087	0.074206	0.588604	0.0424978	-0.00585277	-0.201419	-0.0866434	-0.558212	0.0307711	-0.415983	-0.00196114	-0.0160433	-0.0460806	0.0490502	0.518862	0.125398	0.0068291	-0.278698	0.0766812	-0.571284	0.0922201	-0.425952	-0.0233908	-0.04885	-0.000273083	-0.0163705	0.358887	0.183904	0.0150536	-0.351725	0.222201	-0.552564	0.125878	-0.413847	-0.0323535	-0.0622485	0.0255364	-0.0493143
10	48	ER	0.0604972	0.0599839	-0.200388	0.27001	-0.0835596	0.103561	-0.00343036	0.024624	-0.00495335	0.0552328	0.00326148	0.0311355	0.575396	0.0737133	-0.119801	0.178327	-0.0713624	0.0762117	-0.0232664	0.0184632	0.00165068	0.0385474	0.0396047	0.13576	0.522118	0.0684123	-0.00943138	0.0331845	-0.0943576	0.0168227	-0.0441897	0.0212531	0.0175508	0.000656357	0.10627	0.304766	0.437354	0.0518041	0.133873	-0.112032	-0.106005	-0.0390091	-0.0546608	0.0343265	0.0388653	-0.0403003	0.174003
11	1	nucleoplasm	0.327278	0.523771	-0.298097	0.251341	-0.4108	0.382355	-0.570816	-0.57452	-0.538315	0.440271	-0.429513	-0.136368	-0.743761	0.46449	-0.274239	0.282308	-0.362034	0.343828	-0.540089	-0.542447	-0.505371	0.385997	-0.40452	-0.233176	-0.726331	0.453458	-0.311016	0.376151	-0.378283	0.371759	-0.544083	-0.543697	-0.512853	0.401559	-0.442333	-0.324394	-0.700465	0.447968	-0.333208	0.420582	-0.356127	0.397927	-0.531659	-0.540526	-0.516018	0.417475	-0.469796
11	2	structured cytoplasm	0.286684	-0.622955	-0.266886	0.569251	1.32985	0.0341862	1.398	0.743233	0.536364	-0.203261	0.066563	-0.633807	1.29207	-0.483902	-0.164501	0.552202	1.14668	-0.00725764	1.15846	0.624869	0.468349	-0.1638	0.129848	-0.561588	1.14495	-0.449249	-0.00498574	0.567198	1.08789	-0.151984	1.0812	0.600442	0.500127	-0.268558	0.292293	-0.384909	1.029	-0.449307	0.187505	0.555151	1.04042	-0.285025	1.02768	0.60247	0.538109	-0.366246	0.436189
11	3	nucleoli and cytoplasm	0.306296	-0.477344	-0.303825	0.554108	0.78659	0.131655	0.922643	0.562926	0.375769	-0.0804171	-0.0302696	-0.647521	1.15868	-0.357305	-0.20302	0.519815	0.652345	0.0882629	0.741516	0.461612	0.326891	-0.0454796	0.0253234	-0.555353	1.01221	-0.330397	-0.0768127	0.494006	0.563398	-0.0373009	0.659699	0.439563	0.351494	-0.141036	0.167757	-0.38155	0.89448	-0.335414	0.10175	0.429143	0.538428	-0.162507	0.627601	0.446403	0.390745	-0.239528	0.307043
11	4	cytoskeleton	0.283706	-1.15499	1.56686	-0.960577	0.831436	-1.4653	1.27872	1.28942	1.39449	-1.34538	1.52006	1.26016	0.782001	-1.17875	1.2368	-0.69092	0.977469	-1.38704	1.35132	1.31399	1.3786	-1.34382	1.46606	1.16631	0.896099	-1.20343	1.30448	-0.447983	1.14738	-1.38002	1.44119	1.35	1.39767	-1.35531	1.47414	1.06217	0.994332	-1.21343	1.28909	-0.135341	1.22648	-1.38161	1.47334	1.3594	1.39986	-1.35999	1.47508
11	5	cytoskeleton	0.44694	-1.61753	0.951596	-0.496759	0.659354	-1.46792	1.66325	1.64472	1.62337	-1.47778	1.39086	0.851649	0.984501	-1.53284	0.681269	-0.32039	0.696893	-1.31718	1.60225	1.58176	1.5365	-1.34949	1.28519	0.763947	1.02917	-1.50125	0.594846	-0.13007	0.701882	-1.29778	1.56619	1.55642	1.50881	-1.33972	1.27759	0.701173	1.07244	-1.48937	0.530359	0.117888	0.705791	-1.3061	1.54487	1.54479	1.49908	-1.35334	1.27967
11	6	nucleoplasm	0.31529	1.01778	-0.46166	0.628847	-0.539281	0.838744	-0.860997	-1.0925	-1.03507	0.954489	-0.978368	-1.03355	-1.4596	0.989756	-0.41663	0.63206	-0.575881	0.794736	-0.83496	-1.06079	-1.00247	0.921171	-0.95287	-1.15511	-1.46456	0.978002	-0.455337	0.677611	-0.591763	0.802421	-0.821937	-1.04699	-0.994314	0.924284	-0.973561	-1.23446	-1.45986	0.977701	-0.516826	0.647974	-0.59395	0.82748	-0.811983	-1.04448	-0.998376	0.942736	-1.00928
11	7	structured cytoplasm	0.0699702	-0.588826	0.704419	-0.256669	0.850962	-0.741497	0.964723	0.719366	0.760839	-0.699217	0.813709	0.637723	0.683897	-0.568186	0.492043	-0.0492527	0.962085	-0.631104	0.976895	0.708002	0.715314	-0.633553	0.708899	0.376558	0.782336	-0.563733	0.428215	0.168216	1.01783	-0.586868	0.973301	0.703997	0.69423	-0.602227	0.665705	0.174151	0.836253	-0.561539	0.364186	0.392632	0.99199	-0.570556	0.939261	0.696372	0.682714	-0.590739	0.644907
11	8	ER	0.261335	-0.0573525	-0.220595	0.205879	-0.193046	0.0424898	-0.0201906	0.136844	0.0908147	-0.0397352	0.0729106	0.107432	0.645471	-0.0428544	-0.184036	0.183072	-0.218725	0.0542951	-0.0606071	0.124462	0.0814021	-0.0298067	0.069404	0.137151	0.615614	-0.0471807	-0.108976	0.0980304	-0.193095	-0.00480894	-0.0558655	0.129219	0.0996792	-0.0706952	0.139045	0.263132	0.549922	-0.0544646	-0.0345687	0.00119576	-0.215997	-0.0573451	-0.0755658	0.130445	0.111946	-0.105878	0.197024
11	9	plasma membrane	0.250849	-0.332424	0.0293846	0.471976	1.13451	-0.322631	1.16679	0.394537	0.39562	-0.340437	0.273021	-0.29545	-0.177651	-0.239784	-0.0553224	0.530103	1.13004	-0.132399	1.04872	0.327245	0.292258	-0.185781	0.114756	-0.481179	-0.18638	-0.208699	-0.0219986	0.61392	1.08536	-0.0931219	0.986482	0.301127	0.263881	-0.140069	0.0862165	-0.571199	-0.194274	-0.202828	0.0293105	0.630235	1.06276	-0.116551	0.953006	0.297503	0.269597	-0.14665	0.103411
11	10	nucleoplasm	0.779287	-0.10714	-0.324423	0.602376	1.29979	0.329805	0.894896	0.222999	0.0769333	0.186429	-0.251195	-0.77729	0.953144	-0.0193161	-0.191074	0.557949	1.0501	0.218592	0.678204	0.13682	0.0504254	0.137087	-0.116871	-0.5727	0.773175	-0.00540247	0.00565507	0.519773	0.971025	0.093697	0.614217	0.127865	0.0835609	0.0452042	0.0309763	-0.336261	0.646504	-0.0128989	0.253273	0.42873	0.886747	-0.00547626	0.560346	0.135896	0.114701	-0.0239457	0.144009
11	11	ER	0.0676733	0.0800513	0.0333909	-0.212413	-0.233129	-0.0555883	-0.163129	0.00964593	0.0277577	-0.0266096	0.14043	0.610987	0.185604	0.0057488	-0.0439001	0.00221894	-0.152256	-0.0686686	-0.121196	0.068922	0.0670608	-0.0968383	0.170928	0.563619	0.278827	-0.0184649	-0.0725975	0.144333	-0.112159	-0.066474	-0.106156	0.0804532	0.0711282	-0.112106	0.172238	0.508246	0.315584	-0.0197801	-0.108152	0.256106	-0.115788	-0.0522788	-0.115827	0.0707838	0.060317	-0.106411	0.159954
11	12	nucleoplasm and cytoplasm	0.14492	0.281671	-0.0955411	0.0843956	0.472832	0.162768	0.0554685	-0.233874	-0.215129	0.200839	-0.129439	0.0281923	-0.00301548	0.246601	-0.150571	0.179338	0.543244	0.173529	0.0504779	-0.22424	-0.216754	0.190664	-0.162972	-0.215891	0.0603464	0.245221	-0.207839	0.382422	0.532951	0.218342	0.0284694	-0.234177	-0.236849	0.219998	-0.217567	-0.414103	0.0994475	0.233929	-0.238622	0.56938	0.531767	0.22246	0.0288262	-0.2242	-0.23005	0.220279	-0.226503
11	13	ERGIC	0.824852	0.58075	-0.370171	0.305698	-0.540437	0.467003	-0.696351	-0.661352	-0.629747	0.513406	-0.540359	-0.299622	-0.870826	0.539727	-0.353236	0.325209	-0.540737	0.447131	-0.68439	-0.655097	-0.620032	0.477177	-0.536787	-0.355714	-0.88759	0.539218	-0.395777	0.379512	-0.548791	0.47498	-0.681727	-0.664044	-0.633571	0.495591	-0.572495	-0.376126	-0.893747	0.538657	-0.465689	0.4189	-0.559048	0.509721	-0.679472	-0.669099	-0.644857	0.520029	-0.611324
11	14	ER	0.0568582	0.361187	-0.326695	0.444892	-0.186286	0.382361	-0.211184	-0.321439	-0.336408	0.368073	-0.350243	-0.383702	0.0511597	0.383632	-0.285107	0.422753	-0.221062	0.385346	-0.243836	-0.339549	-0.348883	0.38589	-0.360767	-0.40472	0.0199954	0.386082	-0.241383	0.387972	-0.188562	0.352215	-0.230458	-0.338165	-0.337572	0.367123	-0.325042	-0.329571	-0.0376848	0.382935	-0.208367	0.34293	-0.181034	0.32508	-0.228063	-0.333634	-0.326768	0.348769	-0.293959
11	15	ER	0.125402	0.39505	-0.361877	0.586902	0.554582	0.548295	0.0636946	-0.315567	-0.380708	0.519396	-0.518075	-0.846632	0.50672	0.418134	-0.252605	0.511334	0.321361	0.423403	-0.0602773	-0.337357	-0.360314	0.434263	-0.376968	-0.535953	0.325253	0.417352	-0.152628	0.457248	0.233056	0.35708	-0.101622	-0.336225	-0.338357	0.383506	-0.298205	-0.310893	0.204796	0.407296	-0.0607418	0.40106	0.178578	0.314978	-0.124965	-0.325977	-0.320744	0.352794	-0.248075
11	16	structured cytoplasm	0.429771	-1.63603	1.90848	-1.59501	0.578338	-2.05855	1.2106	1.73294	1.84667	-1.8798	2.0338	1.74332	0.690932	-1.77321	1.45983	-1.3408	0.623554	-2.09142	1.26277	1.83916	1.93584	-1.9963	2.07026	1.69345	0.906109	-1.80028	1.20677	-0.946116	0.605822	-2.02399	1.24854	1.85055	1.91518	-1.98714	1.99841	1.54424	1.06971	-1.79399	0.982105	-0.367738	0.620988	-1.93458	1.25115	1.83903	1.87599	-1.94093	1.89606
11	17	nucleoli	0.151024	1.04319	-0.464699	0.428791	-0.93975	0.84949	-1.05424	-1.14768	-1.0819	0.971034	-1.00644	-0.520953	-2.10641	1.02394	-0.40399	-0.0728056	-0.962242	0.799944	-1.01091	-1.11768	-1.04705	0.941841	-0.9779	-0.337501	-2.11064	1.00777	-0.421779	-0.975027	-0.961049	0.808847	-0.988151	-1.09876	-1.03571	0.945322	-1.00109	-0.164603	-2.0929	1.00601	-0.453064	-2.03093	-0.961886	0.838389	-0.975096	-1.09462	-1.03989	0.965913	-1.04242
11	18	nucleoli	0.28775	-0.110739	-0.433695	-0.0459685	-0.901056	0.341257	-0.838823	-0.258523	-0.307661	0.14704	-0.357596	0.35048	-0.510263	0.0527579	-0.396636	-0.189993	-0.916663	0.412672	-0.82941	-0.381026	-0.417579	0.290202	-0.443629	0.395793	-0.556218	0.135251	-0.436331	-0.424236	-0.908642	0.460781	-0.818833	-0.428434	-0.463378	0.364351	-0.496095	0.39275	-0.554538	0.206938	-0.494787	-0.669237	-0.902429	0.523071	-0.813564	-0.469101	-0.505816	0.448584	-0.562334
11	19	nucleoli	0.414859	1.1141	-0.460541	0.43619	-0.926947	0.888089	-1.08678	-1.24128	-1.16089	1.03299	-1.08426	-0.805918	-2.5958	1.07248	-0.392789	-0.119948	-0.953371	0.832996	-1.03789	-1.1881	-1.10957	0.984761	-1.0419	-0.405936	-2.57093	1.05628	-0.397073	-1.13798	-0.955157	0.84661	-1.01429	-1.16744	-1.09814	0.990839	-1.0715	-0.281285	-2.49897	1.05498	-0.41176	-2.36069	-0.957855	0.880313	-1.0002	-1.16312	-1.1033	1.01561	-1.12208
11	20	ER	0.422954	-1.38193	0.556337	-3.05378	-0.626581	-1.52839	-0.045435	1.16023	1.20514	-1.55622	1.48545	2.13426	-0.0970597	-1.64965	0.369344	-3.19239	-0.652142	-1.62943	-0.0206007	1.29031	1.32531	-1.78424	1.57076	2.25472	0.0829452	-1.67739	0.207172	-3.00896	-0.676118	-1.53116	-0.0464268	1.26829	1.27918	-1.74952	1.46642	2.2136	0.309014	-1.71704	0.0921023	-2.30117	-0.671446	-1.46021	-0.030178	1.28552	1.27864	-1.72317	1.39669
11	21	nucleoplasm	0.260153	0.823541	-0.374542	0.64471	1.4795	0.763117	-0.0985727	-0.83846	-0.824618	0.843918	-0.844236	-1.13128	-0.460386	0.81584	-0.260919	0.631143	1.10035	0.694518	-0.201348	-0.829263	-0.802177	0.797456	-0.774299	-1.029	-0.560852	0.804977	-0.125042	0.654958	0.955513	0.679599	-0.232608	-0.812552	-0.784	0.782877	-0.755603	-0.95047	-0.60356	0.805083	0.0562223	0.602812	0.859548	0.686324	-0.253015	-0.809691	-0.783933	0.789523	-0.762132
11	22	uniform cytoplasm	0.43298	-0.0852176	-0.106132	0.376371	0.649276	-0.040828	0.540963	0.186131	0.158547	-0.092525	0.125966	-0.0216203	0.537305	-0.0385273	-0.0770098	0.409248	0.698142	0.0442232	0.492222	0.154827	0.114607	-0.0161922	0.0531201	-0.17319	0.547304	-0.025833	0.0143531	0.445012	0.652633	0.0355466	0.446169	0.142222	0.108957	-0.00919772	0.0686569	-0.19247	0.505731	-0.0294114	0.116697	0.496219	0.67644	-0.0172521	0.441421	0.147971	0.128405	-0.0419877	0.126403
11	23	vesicles	0.287832	0.32792	-0.243574	0.243547	-0.37317	0.275399	-0.354246	-0.330434	-0.321475	0.305582	-0.303711	-0.28734	-0.236992	0.313256	-0.22855	0.185638	-0.419878	0.248348	-0.37963	-0.322093	-0.305679	0.273229	-0.270956	-0.14512	-0.278673	0.310413	-0.219412	0.210305	-0.403944	0.233245	-0.362829	-0.316319	-0.297028	0.263	-0.255318	-0.063623	-0.311153	0.305703	-0.229497	0.249711	-0.389701	0.233306	-0.350404	-0.309427	-0.292011	0.261374	-0.253164
11	24	mitochondria	0.364704	0.907525	-0.401536	0.524209	-0.151312	0.76033	-0.654481	-0.936329	-0.897304	0.859965	-0.846852	-0.712423	-0.900741	0.880474	-0.290399	0.286331	-0.285153	0.676041	-0.668095	-0.903317	-0.850839	0.798078	-0.762257	-0.307244	-1.0099	0.865043	-0.219297	0.0145382	-0.328986	0.666776	-0.665803	-0.88407	-0.832359	0.790126	-0.756645	-0.101852	-1.04414	0.859249	-0.124379	-0.304255	-0.360179	0.680814	-0.665567	-0.875911	-0.829933	0.800423	-0.772725
11	25	cytoskeleton	0.306916	0.418425	-0.391994	0.449028	-0.558173	0.524285	-0.506246	-0.43534	-0.462992	0.513196	-0.528459	-0.694521	-0.0483016	0.450428	-0.36025	0.435333	-0.556331	0.53226	-0.498945	-0.462289	-0.482543	0.546072	-0.5525	-0.802653	-0.0831536	0.457284	-0.391067	0.535631	-0.521667	0.526296	-0.471966	-0.463064	-0.479192	0.540623	-0.548067	-0.9047	-0.106269	0.462818	-0.462933	0.601413	-0.517583	0.532008	-0.468203	-0.467917	-0.483308	0.543276	-0.555914
11	26	nucleoplasm	0.689782	0.438749	-0.118905	-0.0147899	-0.460384	0.2715	-0.504776	-0.427966	-0.3905	0.345888	-0.288829	0.0191876	-0.523076	0.370632	-0.194009	0.102992	-0.477089	0.247096	-0.492048	-0.379261	-0.353412	0.286378	-0.270498	-0.0618454	-0.439608	0.361515	-0.277179	0.331635	-0.458512	0.27478	-0.480009	-0.377296	-0.360833	0.295381	-0.304922	-0.171339	-0.396156	0.363102	-0.382867	0.524235	-0.450424	0.309529	-0.472768	-0.381779	-0.372433	0.317313	-0.346407
11	27	nucleoli	0.136571	0.37322	-0.366078	0.109463	-0.772592	0.361205	-0.774142	-0.51134	-0.496726	0.344944	-0.414529	-0.00014913	-0.873474	0.348287	-0.352427	0.133741	-0.78483	0.353132	-0.7601	-0.516875	-0.49916	0.321932	-0.410791	0.0615594	-0.890394	0.364353	-0.41089	0.168905	-0.781594	0.38963	-0.751582	-0.535507	-0.522633	0.354662	-0.456304	0.0756912	-0.875555	0.386749	-0.490016	0.142946	-0.774985	0.439252	-0.745673	-0.554312	-0.547408	0.401856	-0.507576
11	28	structured cytoplasm	0.582394	0.303937	-0.172943	0.277593	0.0408946	0.245947	-0.127045	-0.257969	-0.250193	0.269898	-0.217822	-0.118915	0.093747	0.311746	-0.186248	0.376826	0.0710152	0.280459	-0.127987	-0.266821	-0.268416	0.300812	-0.264813	-0.332929	0.136929	0.316227	-0.221723	0.519697	0.0665218	0.30177	-0.137182	-0.273302	-0.279177	0.316779	-0.290308	-0.470835	0.140564	0.316705	-0.275954	0.64481	0.0516125	0.313104	-0.146033	-0.275116	-0.282751	0.322591	-0.302239
11	29	nucleoplasm and cytoplasm	0.570019	-1.36156	1.71997	-2.31806	-0.103365	-1.78435	0.506796	1.19615	1.35925	-1.56049	1.58251	1.37863	-0.0392287	-1.52965	5.0538	-2.10762	1.61661	-2.40186	2.11331	1.67533	1.96648	-1.84631	2.20089	1.40863	0.243263	-1.58251	4.9384	-1.72183	1.81906	-2.46875	2.33222	1.75499	2.03796	-1.89117	2.21982	1.35665	0.420814	-1.59916	5.08903	-1.04987	2.19814	-2.49925	2.57673	1.80036	2.06762	-1.90255	2.20623
11	30	mitochondria	0.229903	-0.00599745	-0.31368	0.379256	-0.216087	0.249562	-0.0629283	0.0610734	-0.0323729	0.14885	-0.151044	-0.326419	0.743712	0.00363898	-0.187263	0.125308	-0.265244	0.102541	-0.121427	0.0639575	0.0226315	0.0372525	0.00774833	0.0920856	0.56244	-0.0163054	-0.0145745	-0.155662	-0.201249	-0.0232534	-0.0887391	0.0909155	0.0751699	-0.0599076	0.152775	0.420974	0.439656	-0.0397904	0.114326	-0.367349	-0.220047	-0.101913	-0.103031	0.107697	0.103516	-0.121676	0.241809
11	31	cytoskeleton	0.267928	-0.0953226	-0.04348	0.165685	0.425602	-0.0807677	0.404675	0.184241	0.174323	-0.114632	0.171797	0.195724	0.53563	-0.060702	-0.0911457	0.253342	0.510089	0.0215914	0.386167	0.146683	0.116062	-0.0399654	0.0855841	0.0480856	0.551373	-0.0479134	-0.0743004	0.297758	0.477432	0.0657761	0.349895	0.12741	0.0911032	-0.0009002	0.0503253	-0.0614382	0.540663	-0.0473091	-0.0310074	0.348875	0.504973	0.0699859	0.350542	0.12534	0.0911069	5.80733e-05	0.0547103
11	32	focal	0.465538	-0.132486	-0.136225	-0.193423	-0.377654	-0.146614	-0.194625	0.125332	0.128275	-0.185296	0.181593	0.415299	0.11748	-0.143403	-0.151815	-0.145592	-0.354171	-0.0831376	-0.192984	0.11733	0.106225	-0.168064	0.141951	0.357343	0.151159	-0.133438	-0.150428	-0.152785	-0.354533	-0.0348139	-0.196152	0.100172	0.0835617	-0.128783	0.103651	0.276972	0.174643	-0.136064	-0.115657	-0.150848	-0.31077	-0.0279151	-0.164465	0.1063	0.0907758	-0.123016	0.107207
11	33	nucleoli	0.0580474	0.753943	-0.440238	0.557268	-0.615184	0.701641	-0.699658	-0.766737	-0.757393	0.75406	-0.756085	-0.860596	-0.513865	0.745031	-0.390922	0.517135	-0.648153	0.648692	-0.692007	-0.7545	-0.732634	0.722711	-0.717637	-0.821819	-0.566428	0.73938	-0.406036	0.461825	-0.651554	0.630609	-0.682917	-0.748267	-0.722212	0.708791	-0.703214	-0.761195	-0.628271	0.73729	-0.430755	0.322435	-0.65483	0.626593	-0.677938	-0.745174	-0.718699	0.704298	-0.698232
11	34	uniform cytoplasm	0.208988	-0.425955	-0.280207	0.559473	1.21953	0.0815578	1.15992	0.517363	0.363135	-0.116853	-0.0022051	-0.567789	0.932188	-0.296132	-0.22983	0.583291	1.09689	0.165819	0.971958	0.402084	0.260718	0.033239	-0.0792134	-0.70429	0.84854	-0.263014	-0.153695	0.650321	1.01841	0.105118	0.892202	0.372639	0.26267	-0.00383477	-0.0039904	-0.683914	0.773121	-0.256355	-0.100423	0.69088	0.936796	0.0187087	0.828993	0.366074	0.282631	-0.0743925	0.0916202
11	35	uniform cytoplasm	0.267948	-0.646522	0.591844	-0.131375	0.804958	-0.814527	1.05456	0.790857	0.833484	-0.756339	0.851288	0.680856	0.693569	-0.623023	0.418131	0.0777286	1.08392	-0.690146	1.13238	0.784377	0.78885	-0.699273	0.762802	0.472886	0.7896	-0.613327	0.389433	0.268574	1.08416	-0.627326	1.09957	0.770623	0.755208	-0.660613	0.710536	0.280348	0.831882	-0.608117	0.378002	0.480605	1.07247	-0.613958	1.0716	0.760411	0.743547	-0.646781	0.69364
11	36	ER	0.0983756	0.135127	-0.3284	0.548675	0.446184	0.383551	0.292745	-0.0616478	-0.149578	0.309647	-0.348174	-0.756632	0.533334	0.18474	-0.216015	0.468056	0.332936	0.298962	0.184816	-0.103125	-0.150656	0.273594	-0.256039	-0.580493	0.396777	0.192989	-0.103549	0.421254	0.291786	0.21417	0.151288	-0.108574	-0.128882	0.212416	-0.16145	-0.41971	0.295579	0.188028	-0.0259077	0.427885	0.26507	0.151063	0.129659	-0.103388	-0.108643	0.165259	-0.0920444
11	37	nucleoli	0.337198	1.04901	-0.392323	0.421312	-0.579788	0.840665	-0.925233	-1.1394	-1.07219	0.977611	-0.993417	-0.591149	-1.8845	1.00637	-0.234521	-0.167178	-0.662849	0.771117	-0.90161	-1.08343	-1.0144	0.91879	-0.926493	-0.041348	-1.9201	0.983616	-0.0695567	-1.20362	-0.691056	0.77119	-0.887324	-1.05374	-0.992371	0.911647	-0.928731	0.298054	-1.89735	0.976928	0.172616	-2.46426	-0.7127	0.792131	-0.879231	-1.04282	-0.99113	0.925492	-0.955107
11	38	mitochondria	0.28449	-0.220314	-0.0484073	-0.132809	-0.485022	-0.300463	-0.142072	0.185957	0.211109	-0.256466	0.215573	0.310195	-0.0183504	-0.213647	-0.0625274	-0.275164	-0.477444	-0.251799	-0.147488	0.175327	0.193808	-0.247902	0.20745	0.522537	-0.0536615	-0.201696	-0.0570744	-0.492136	-0.476045	-0.225914	-0.144401	0.165879	0.177559	-0.230633	0.19738	0.645216	-0.0772912	-0.200119	-0.0279842	-0.608815	-0.443042	-0.214967	-0.116449	0.171459	0.179487	-0.222459	0.201183
11	39	Golgi	0.208442	-0.891109	0.49575	-0.384191	0.246672	-1.02423	0.785632	0.963362	1.01265	-0.987383	1.02195	0.867018	0.741843	-0.853303	0.278243	-0.160877	0.293769	-0.837315	0.764665	0.933671	0.930884	-0.897338	0.893128	0.718708	0.829035	-0.830143	0.213105	0.0366064	0.288962	-0.748431	0.741231	0.910602	0.883404	-0.837785	0.821404	0.548991	0.876311	-0.817745	0.162872	0.246237	0.271815	-0.695843	0.710273	0.891938	0.854146	-0.799735	0.775826
11	40	nucleoli	0.2384	0.0826264	-0.428797	-0.16609	-0.942498	0.374765	-0.914059	-0.415888	-0.432474	0.208367	-0.410549	0.546352	-1.00244	0.256613	-0.38259	-0.374225	-0.952906	0.481286	-0.892842	-0.519962	-0.534408	0.404589	-0.527362	0.557344	-0.929162	0.36757	-0.40712	-0.848451	-0.951871	0.578579	-0.886418	-0.590424	-0.607541	0.557306	-0.646149	0.428716	-0.889501	0.419648	-0.441723	-1.4962	-0.950467	0.64363	-0.878405	-0.623384	-0.645713	0.643793	-0.726388
11	41	Golgi	0.39081	-0.480307	0.256115	-1.23473	-0.51247	-0.647381	-0.205316	0.435397	0.466431	-0.62412	0.653396	1.14785	-0.195522	-0.659859	0.11845	-1.14119	-0.53269	-0.715581	-0.195279	0.530249	0.552173	-0.786537	0.721015	1.17268	-0.0757575	-0.678964	0.0093972	-0.908321	-0.530954	-0.665669	-0.196045	0.524414	0.532608	-0.77157	0.663059	1.08467	0.0574635	-0.680404	-0.113647	-0.540218	-0.532002	-0.589563	-0.202096	0.507974	0.503649	-0.731191	0.587975
11	42	nucleoplasm and cytoplasm	0.287191	0.490447	-0.375916	0.430384	-0.484953	0.510002	-0.501615	-0.478498	-0.49024	0.515473	-0.499816	-0.495325	-0.0399394	0.504663	-0.351744	0.454168	-0.482919	0.525163	-0.493163	-0.487813	-0.500821	0.541717	-0.530324	-0.624151	-0.0348404	0.506782	-0.392485	0.521464	-0.484083	0.531036	-0.491063	-0.490635	-0.50372	0.549581	-0.542269	-0.697907	-0.0641725	0.509816	-0.461729	0.566354	-0.477941	0.532827	-0.485315	-0.49319	-0.505442	0.550023	-0.546041
11	43	mitochondria	0.176822	-0.129312	0.372638	-0.753462	-0.322705	-0.334692	-0.149049	0.175621	0.221511	-0.269715	0.383002	0.91114	-0.103367	-0.251715	0.202772	-0.617452	-0.340045	-0.393844	-0.134184	0.261806	0.292316	-0.393955	0.45063	0.980229	-0.0065737	-0.286213	0.250068	-0.595931	-0.27933	-0.418635	-0.0943033	0.286574	0.315956	-0.426162	0.477465	1.02941	0.0483887	-0.292481	0.265195	-0.543307	-0.278407	-0.414088	-0.0974299	0.282604	0.310711	-0.427394	0.478013
11	44	nucleoplasm and cytoplasm	0.367621	0.60514	-0.309188	0.459665	0.00624584	0.501763	-0.303044	-0.571701	-0.549023	0.547429	-0.490539	-0.35953	-0.247853	0.612618	-0.298161	0.528802	0.0664983	0.536219	-0.290645	-0.578013	-0.566523	0.578813	-0.543679	-0.644354	-0.198069	0.613625	-0.35126	0.726574	0.0945345	0.56174	-0.282807	-0.578774	-0.574098	0.603048	-0.582035	-0.890614	-0.180656	0.614188	-0.395807	0.81905	0.114457	0.576957	-0.278088	-0.578185	-0.577303	0.615031	-0.601365
11	45	nucleoli and cytoplasm	0.242267	-0.0374657	-0.338604	0.463932	-0.00746979	0.256377	0.0170614	0.0755262	-0.0194174	0.135007	-0.169354	-0.424075	0.736555	0.0263105	-0.289392	0.454501	-0.0612041	0.279651	-0.0513085	0.0215705	-0.0585523	0.199757	-0.200384	-0.455739	0.667783	0.0352504	-0.266714	0.473095	-0.0779963	0.240461	-0.0678584	0.0144756	-0.0482114	0.176691	-0.155012	-0.404241	0.598319	0.0325908	-0.240912	0.418372	-0.119601	0.196316	-0.094375	0.0141223	-0.0356176	0.138438	-0.100307
11	47	structured cytoplasm	0.475016	-0.923295	0.887902	-0.488375	0.935685	-1.0967	1.15594	1.06906	1.11685	-1.06461	1.19293	1.00346	0.85591	-0.936161	0.715783	-0.236616	1.41267	-1.0251	1.33079	1.10409	1.11626	-1.05563	1.15578	0.858218	0.979591	-0.946287	0.653166	0.0226973	1.52981	-0.973811	1.34408	1.11195	1.09962	-1.03724	1.11779	0.690253	1.05652	-0.943835	0.615668	0.278295	1.49618	-0.940542	1.30063	1.09952	1.0793	-1.01728	1.08526
11	48	ER	0.0481211	0.0675546	-0.182931	0.0692118	-0.138754	0.0712864	-0.09555	0.00128831	-0.0198421	0.0326008	0.0228579	0.284343	0.346961	0.0563733	-0.147477	0.027774	-0.134469	0.0725455	-0.118196	0.00322542	-0.0166703	0.0153338	0.0350255	0.332391	0.335211	0.0568948	-0.0939196	-0.0530022	-0.148128	0.0459654	-0.131918	-0.00205979	-0.0133578	-0.00135454	0.0686447	0.441137	0.285949	0.0432196	-0.0159028	-0.111678	-0.14482	0.00713441	-0.134793	0.00736726	0.00284603	-0.0306482	0.117121
12	1	nucleoplasm	0.380302	0.314368	-0.312855	0.509878	0.245688	0.390519	0.0147971	-0.234521	-0.272493	0.351133	-0.317655	-0.465939	0.495345	0.347884	-0.254911	0.518606	0.254858	0.423513	-0.018695	-0.264605	-0.300062	0.409798	-0.365455	-0.591589	0.468802	0.351178	-0.180041	0.539011	0.264579	0.412842	-0.0233019	-0.265802	-0.294865	0.410544	-0.349428	-0.608326	0.413898	0.345211	-0.122507	0.533181	0.239338	0.387516	-0.0367259	-0.258658	-0.280855	0.388534	-0.312568
12	2	structured cytoplasm	0.407095	0.916224	-0.452357	0.623151	-0.381467	0.79502	-0.708876	-0.951542	-0.918353	0.88464	-0.898576	-1.03768	-0.88744	0.898971	-0.406901	0.634479	-0.424768	0.744076	-0.69837	-0.932837	-0.89212	0.848527	-0.860367	-1.04657	-0.933607	0.891201	-0.435907	0.693024	-0.434911	0.741617	-0.6893	-0.924284	-0.884253	0.844585	-0.865902	-1.04025	-0.969633	0.891254	-0.496753	0.713037	-0.442768	0.757333	-0.683904	-0.923003	-0.886892	0.856164	-0.888648
12	3	nucleoli and cytoplasm	0.407242	-0.755505	-0.228546	0.523514	0.971709	-0.103784	1.1277	0.835197	0.642272	-0.348568	0.235971	-0.423639	1.35142	-0.605937	-0.159047	0.522555	0.870849	-0.0542364	0.942528	0.706983	0.542746	-0.231304	0.191627	-0.475421	1.23789	-0.569226	-0.0305194	0.549758	0.838315	-0.161634	0.879846	0.679185	0.556904	-0.309004	0.317623	-0.371437	1.13889	-0.570177	0.0869121	0.57913	0.803433	-0.283994	0.841282	0.683003	0.592871	-0.408064	0.449596
12	4	cytoskeleton	0.204133	-0.668347	0.598399	-0.266717	0.572899	-0.808963	0.848777	0.803135	0.849667	-0.789922	0.907734	0.800687	0.77965	-0.653863	0.48004	-0.0342357	0.941015	-0.716761	0.993074	0.81406	0.823826	-0.757845	0.857176	0.694865	0.857129	-0.6593	0.499614	0.149951	1.07132	-0.687883	1.03499	0.825682	0.819133	-0.748892	0.847914	0.587008	0.901211	-0.664339	0.499471	0.339727	1.07861	-0.670044	1.01225	0.823245	0.808566	-0.741029	0.834265
12	5	cytoskeleton	0.200834	-0.283613	-0.183454	0.233939	-0.00358685	-0.0111128	0.134762	0.260122	0.20531	-0.125973	0.0967701	-0.0219597	0.697857	-0.180361	-0.205705	0.290065	0.00931128	0.119473	0.0938745	0.166428	0.100762	0.0225087	-0.0261605	-0.223045	0.681482	-0.153991	-0.209519	0.347509	0.0133951	0.138694	0.0828747	0.145924	0.0824741	0.0491167	-0.0413364	-0.346629	0.659201	-0.148179	-0.196814	0.400332	0.0271722	0.122664	0.0901126	0.146901	0.0886931	0.0366427	-0.0209232
12	6	nucleoplasm	0.294041	1.0131	-0.457595	0.613877	-0.540065	0.835742	-0.854302	-1.08729	-1.03033	0.950376	-0.974485	-1.03711	-1.47278	0.985567	-0.40927	0.594265	-0.578573	0.790613	-0.82951	-1.05619	-0.998021	0.916213	-0.946565	-1.11656	-1.4856	0.973864	-0.443344	0.625043	-0.569847	0.797005	-0.810189	-1.04188	-0.988818	0.918915	-0.965649	-1.16783	-1.47942	0.974147	-0.512584	0.657999	-0.576346	0.822503	-0.801631	-1.04046	-0.994024	0.938293	-1.00293
12	7	structured cytoplasm	0.432384	-1.35829	0.765059	-0.856293	0.190767	-1.47975	0.875156	1.40957	1.4532	-1.48285	1.50351	1.29097	0.890811	-1.42143	0.636184	-0.607195	0.41494	-1.46074	1.03216	1.49935	1.506	-1.53882	1.52942	1.26181	1.00784	-1.42666	0.640036	-0.460675	0.440809	-1.44057	1.02867	1.50069	1.49034	-1.53837	1.52457	1.21254	1.06446	-1.4495	0.703058	-0.267364	0.457455	-1.46393	1.01159	1.51066	1.50227	-1.55941	1.5486
12	8	ER	0.142517	0.173007	-0.333221	0.463977	-0.0283461	0.359557	-0.0161401	-0.125431	-0.191056	0.300469	-0.312349	-0.458569	0.407169	0.215014	-0.275732	0.423782	-0.0765991	0.337501	-0.075583	-0.158718	-0.20694	0.307479	-0.291914	-0.432213	0.336393	0.21942	-0.239102	0.387543	-0.100067	0.285367	-0.0957112	-0.159916	-0.192312	0.266126	-0.234225	-0.334672	0.264481	0.214832	-0.193496	0.311624	-0.108933	0.239407	-0.105724	-0.154541	-0.176118	0.228931	-0.183103
12	9	plasma membrane	0.283185	0.749664	-0.414418	0.598133	-0.122843	0.71389	-0.474486	-0.740824	-0.739751	0.76514	-0.767266	-0.963657	-0.334707	0.746085	-0.352112	0.584727	-0.177734	0.670741	-0.490643	-0.73633	-0.725382	0.744263	-0.734759	-0.965997	-0.395854	0.740898	-0.356135	0.642465	-0.205367	0.654431	-0.494626	-0.73011	-0.714156	0.729283	-0.719499	-0.925666	-0.452964	0.739052	-0.40404	0.669393	-0.221524	0.653285	-0.498057	-0.727273	-0.710928	0.725571	-0.717791
12	10	nucleoplasm	0.498273	0.293767	-0.346358	0.0555406	-0.669292	0.211693	-0.792488	-0.544287	-0.497679	0.227113	-0.384975	-0.141043	-1.50886	0.291453	-0.345664	0.0984689	-0.69221	0.250846	-0.79608	-0.588779	-0.540236	0.237845	-0.435197	-0.174489	-1.53986	0.329084	-0.396569	0.176403	-0.687555	0.3368	-0.79483	-0.627484	-0.590603	0.306573	-0.524809	-0.250375	-1.48132	0.378057	-0.512676	0.348434	-0.702495	0.426594	-0.797446	-0.66211	-0.637552	0.388075	-0.616362
12	11	ER	0.102137	0.185667	-0.111444	0.0464145	-0.258572	0.0835621	-0.229234	-0.15697	-0.133278	0.115506	-0.0587154	0.12461	0.0621619	0.175778	-0.155117	0.0856557	-0.292114	0.114711	-0.250779	-0.155797	-0.142628	0.119031	-0.0849981	0.0873651	0.0912736	0.176052	-0.160729	0.111355	-0.284313	0.125861	-0.246251	-0.154872	-0.146618	0.126835	-0.0925931	0.10392	0.0792356	0.175631	-0.167602	0.122962	-0.294924	0.142801	-0.252877	-0.156043	-0.153311	0.138853	-0.105317
12	12	nucleoplasm and cytoplasm	0.145791	0.0796518	0.0212136	0.327007	0.63994	-0.0262966	0.420751	0.0111757	0.0395256	0.00355762	0.0683931	0.00889667	0.18782	0.121887	-0.0800685	0.47759	0.821649	0.083463	0.442729	-0.0209431	-0.02271	0.0794401	-0.0356262	-0.277173	0.244301	0.133424	-0.105451	0.645725	0.850379	0.139125	0.433071	-0.0303123	-0.0476749	0.122325	-0.0882842	-0.508256	0.265637	0.137111	-0.136781	0.757011	0.809576	0.164321	0.402533	-0.0360261	-0.0584583	0.143847	-0.114338
12	13	ERGIC	0	-0.678253	0.148935	0.138045	0.88478	-0.486315	1.04592	0.776722	0.707516	-0.59429	0.57913	0.221296	0.90693	-0.623976	0.0874633	0.208683	0.875226	-0.386622	0.935603	0.73069	0.650775	-0.497282	0.49032	0.055685	0.92326	-0.605236	0.137274	0.298361	0.826692	-0.406119	0.872668	0.708902	0.642741	-0.502383	0.517497	0.0147044	0.899944	-0.605064	0.214024	0.380001	0.819884	-0.455897	0.838433	0.702811	0.65433	-0.541681	0.573881
12	14	ER	0.0879394	0.393088	-0.411625	0.476122	-0.559012	0.535878	-0.504819	-0.378871	-0.427437	0.510185	-0.512399	-0.645424	0.290745	0.419158	-0.361178	0.393885	-0.581815	0.497117	-0.511156	-0.400696	-0.42792	0.497111	-0.481825	-0.559731	0.19773	0.421472	-0.371227	0.291785	-0.576552	0.462637	-0.506531	-0.402296	-0.418682	0.465036	-0.442441	-0.467438	0.115301	0.419655	-0.400795	0.165456	-0.573085	0.441707	-0.502907	-0.400167	-0.411003	0.443602	-0.415915
12	15	ER	0.117528	0.205926	-0.36593	0.533133	-0.0775335	0.425534	-0.0176594	-0.169999	-0.245296	0.361197	-0.400999	-0.694852	0.307877	0.239599	-0.264069	0.426241	-0.159588	0.299567	-0.0941311	-0.188804	-0.217044	0.282064	-0.272527	-0.421349	0.168092	0.242165	-0.175028	0.311479	-0.182983	0.212248	-0.115235	-0.189465	-0.192412	0.222746	-0.183026	-0.218383	0.0663361	0.232854	-0.0586628	0.186892	-0.174714	0.148586	-0.117764	-0.178876	-0.168475	0.181015	-0.116506
12	16	structured cytoplasm	0.328325	-0.282808	0.19293	-0.316718	0.0181059	-0.370575	0.199609	0.373608	0.394284	-0.378005	0.473376	0.676265	0.528287	-0.284186	0.0374603	-0.0523975	0.0772872	-0.268182	0.202963	0.367459	0.352849	-0.34171	0.39093	0.499298	0.62164	-0.284749	0.00943655	0.120813	0.119668	-0.237106	0.218959	0.368225	0.341294	-0.325305	0.367727	0.361335	0.669314	-0.279803	-0.017762	0.253494	0.10086	-0.21345	0.194958	0.354257	0.324929	-0.305866	0.345215
12	17	nucleoli	0.139532	1.00451	-0.380224	0.458214	-0.369036	0.819374	-0.823595	-1.08082	-1.02245	0.950067	-0.955705	-0.676944	-1.59415	0.967055	-0.210368	-0.055474	-0.483441	0.744676	-0.815622	-1.02919	-0.966175	0.888685	-0.881802	-0.169855	-1.64801	0.946165	-0.0119304	-0.951273	-0.524635	0.740346	-0.806925	-1.00096	-0.942761	0.878216	-0.876753	0.13992	-1.64105	0.94087	0.288151	-2.06842	-0.555516	0.75699	-0.802331	-0.991631	-0.941762	0.889427	-0.896707
12	18	nucleoli	0.804132	-1.04949	-0.308358	-1.54256	-0.968941	-0.541253	-0.744097	0.485052	0.4542	-0.950911	0.576585	2.09088	-0.555809	-0.824643	-0.335419	-1.45839	-0.988979	-0.266187	-0.780488	0.235137	0.192201	-0.67305	0.31289	2.14596	-0.60457	-0.70869	-0.413169	-1.43	-0.982506	-0.102397	-0.781869	0.136984	0.0742214	-0.489139	0.14847	2.0688	-0.472137	-0.573354	-0.517735	-1.39025	-0.978846	0.0492323	-0.782475	0.051751	-0.0245635	-0.290758	-0.00311344
12	19	nucleoli	0.261672	0.832339	-0.462161	0.369053	-0.942861	0.741045	-1.04194	-0.990204	-0.944566	0.778056	-0.856447	-0.0708802	-1.91683	0.902067	-0.413711	0.132575	-0.961479	0.742863	-1.00394	-1.02564	-0.969368	0.832995	-0.891352	-0.215759	-1.90918	0.952205	-0.452392	-0.317662	-0.960814	0.79028	-0.986693	-1.05169	-0.998032	0.901224	-0.964608	-0.280506	-1.89381	0.967647	-0.512802	-0.932957	-0.957952	0.830305	-0.973173	-1.05998	-1.01346	0.939942	-1.02213
12	20	ER	0.225081	0.0803566	-0.135037	-0.230823	-0.55076	0.00867173	-0.413966	-0.0737677	-0.0685866	0.0117389	0.0197826	0.405197	-0.0862102	0.00365284	-0.190776	-0.113745	-0.552451	-0.00218811	-0.405663	-0.0331522	-0.0380771	-0.054879	0.040249	0.414605	-0.0284522	-0.00515612	-0.243942	0.0356412	-0.525207	0.017146	-0.390482	-0.0341691	-0.0450889	-0.0523772	0.0215358	0.375089	0.012209	-0.00294348	-0.310708	0.170033	-0.509886	0.0441444	-0.382108	-0.0421044	-0.056286	-0.0387152	-0.00203179
12	21	nucleoplasm	0.869882	0.395019	-0.163248	0.631281	5.04536	0.578591	1.41948	-0.346241	-0.402723	0.589975	-0.564224	-0.994871	0.479027	0.43332	0.129936	0.588715	4.13594	0.490366	1.083	-0.37817	-0.401299	0.543716	-0.451981	-0.800257	0.314335	0.427666	0.616057	0.586346	3.76628	0.434378	0.965241	-0.358653	-0.366063	0.49568	-0.370443	-0.643524	0.23316	0.427462	1.27831	0.533732	3.51659	0.399546	0.888486	-0.351477	-0.353037	0.471388	-0.317347
12	22	uniform cytoplasm	0.289367	-0.477211	-0.0488857	0.405022	1.08526	-0.315911	1.14005	0.597968	0.544782	-0.427429	0.407872	-0.0312434	0.932918	-0.367354	-0.0633738	0.473956	1.10404	-0.138022	1.03439	0.507583	0.42864	-0.260116	0.251254	-0.272699	0.921618	-0.334298	0.021537	0.562497	1.07031	-0.135425	0.978147	0.478593	0.408537	-0.235209	0.260594	-0.348862	0.874125	-0.330526	0.126475	0.635961	1.0513	-0.190225	0.943364	0.476102	0.423502	-0.265438	0.323035
12	23	vesicles	0.269539	0.711317	-0.435381	0.452703	-0.757716	0.684044	-0.76207	-0.729944	-0.727133	0.734332	-0.72777	-0.652899	-0.455976	0.701561	-0.37928	0.296582	-0.78316	0.614565	-0.749126	-0.714682	-0.69422	0.679135	-0.661097	-0.413074	-0.541345	0.689526	-0.385305	0.0857965	-0.762636	0.586138	-0.726129	-0.700012	-0.675742	0.652916	-0.631453	-0.222589	-0.604738	0.683266	-0.401641	-0.11561	-0.739923	0.576259	-0.706067	-0.690515	-0.66659	0.642336	-0.618975
12	24	mitochondria	0.186076	0.685989	-0.284406	0.463524	0.225559	0.604062	-0.33273	-0.665756	-0.655452	0.665998	-0.623312	-0.465484	-0.472854	0.656941	-0.0748991	0.116286	0.0177911	0.471566	-0.401501	-0.626425	-0.588325	0.570344	-0.481787	0.0747544	-0.622221	0.633289	0.129164	-0.271737	-0.0636284	0.432184	-0.422087	-0.599494	-0.555887	0.537509	-0.434529	0.371643	-0.683109	0.615198	0.334752	-0.57682	-0.120549	0.419941	-0.435846	-0.581718	-0.540976	0.524405	-0.414923
12	25	cytoskeleton	0.198944	-0.812727	-0.359201	0.503935	6.98585e-05	0.0964651	0.623368	0.784509	0.540738	-0.169468	0.00190932	-0.646862	1.33116	-0.640067	-0.270235	0.406891	-0.0613682	0.057274	0.497129	0.64385	0.469303	-0.127826	0.0536667	-0.541712	1.16111	-0.603709	-0.209961	0.369967	-0.0345574	-0.0641995	0.491796	0.628363	0.497227	-0.239708	0.193904	-0.443211	1.07196	-0.599598	-0.09793	0.347545	0.0836237	-0.199823	0.566244	0.64755	0.548677	-0.355718	0.346301
12	26	nucleoplasm	0.554501	0.368608	-0.166205	0.120504	-0.194839	0.250128	-0.274368	-0.317554	-0.293407	0.28636	-0.199673	0.128236	-0.010174	0.343898	-0.202863	0.26026	-0.144552	0.269957	-0.25337	-0.305065	-0.296151	0.277853	-0.223419	-0.0439584	0.0477393	0.334161	-0.212354	0.357076	-0.141767	0.280364	-0.251505	-0.300836	-0.298271	0.283327	-0.236788	-0.129637	0.0509705	0.320469	-0.192964	0.419271	-0.093371	0.26393	-0.228591	-0.285755	-0.282324	0.271177	-0.217876
12	27	nucleoli	0.102131	0.428109	-0.405009	0.24367	-0.705882	0.460096	-0.681514	-0.478269	-0.487311	0.4305	-0.454452	-0.161224	-0.239804	0.441933	-0.368648	0.209208	-0.718781	0.454455	-0.673724	-0.505306	-0.504632	0.435246	-0.461414	-0.131233	-0.310553	0.45468	-0.395365	0.180785	-0.703735	0.462515	-0.660441	-0.518589	-0.514961	0.445045	-0.469277	-0.0665915	-0.355784	0.470939	-0.427071	0.114803	-0.689447	0.478493	-0.650134	-0.530881	-0.527086	0.466985	-0.483401
12	28	structured cytoplasm	0.350808	-0.261977	0.0416347	-0.665232	-0.160873	-0.344577	-0.056204	0.221891	0.265048	-0.346598	0.367395	0.671102	0.236623	-0.315212	0.583597	-0.339684	0.405897	-0.543365	0.468676	0.405754	0.46722	-0.450737	0.570741	0.559701	0.409082	-0.34023	0.665707	-0.0571158	0.557978	-0.557457	0.59109	0.451365	0.503559	-0.462979	0.579114	0.401821	0.490213	-0.341068	0.547702	0.262893	0.623997	-0.542134	0.622549	0.454941	0.49652	-0.455995	0.552894
12	29	nucleoplasm and cytoplasm	0.422638	-1.55607	2.61909	-1.30381	0.950178	-2.02619	1.629	1.51773	1.74233	-1.73623	1.81283	1.09637	0.342192	-1.47148	2.17363	-0.922229	1.50117	-1.83886	1.99142	1.46483	1.6362	-1.60011	1.65147	0.988503	0.436911	-1.4511	2.16096	-0.539479	1.96792	-1.77119	2.27748	1.49628	1.62938	-1.54734	1.59475	0.827376	0.556652	-1.44044	2.08169	-0.0653453	2.29669	-1.73683	2.48554	1.52662	1.63012	-1.51001	1.54589
12	30	mitochondria	0.316655	0.669062	-0.403897	0.456535	-0.599331	0.614509	-0.644036	-0.666785	-0.661288	0.656619	-0.639077	-0.575179	-0.390706	0.646585	-0.318575	0.26257	-0.620361	0.524292	-0.634486	-0.637188	-0.61179	0.586457	-0.546888	-0.244476	-0.486219	0.631916	-0.286567	0.0530917	-0.614592	0.491043	-0.623201	-0.622264	-0.59252	0.55954	-0.511564	-0.0236617	-0.561961	0.620919	-0.236189	-0.147268	-0.591576	0.475665	-0.604027	-0.608547	-0.578904	0.549311	-0.493196
12	31	cytoskeleton	0.269356	-0.793808	-0.269205	0.47541	0.704486	-0.231519	0.995995	0.851826	0.700878	-0.506755	0.359441	-0.2695	1.33257	-0.612653	-0.275279	0.550194	0.690418	0.0116214	0.876611	0.686448	0.514031	-0.211692	0.120281	-0.585827	1.27622	-0.557744	-0.28402	0.675327	0.636253	0.0367133	0.812547	0.635803	0.474395	-0.159118	0.101254	-0.76505	1.22838	-0.538664	-0.309933	0.775957	0.61029	0.0110785	0.774131	0.615689	0.470544	-0.175695	0.134511
12	32	focal	0.301463	-1.30708	0.866738	-1.15218	0.078232	-1.48673	0.748916	1.33843	1.40976	-1.45752	1.50107	1.38086	0.769947	-1.34189	0.588931	-0.94553	0.105041	-1.37091	0.752573	1.35579	1.38141	-1.44863	1.43115	1.34539	0.870731	-1.36758	0.69616	-0.857976	0.260067	-1.37972	0.854689	1.40088	1.41813	-1.46768	1.46978	1.31052	0.96291	-1.37465	0.726061	-0.650843	0.260496	-1.34781	0.842638	1.39834	1.4087	-1.45392	1.4524
12	33	nucleoli	0.0881546	0.742519	-0.457985	0.533532	-0.808299	0.743322	-0.808682	-0.765545	-0.769112	0.798204	-0.807714	-0.977117	-0.359355	0.741169	-0.411346	0.433805	-0.836072	0.682527	-0.794134	-0.762812	-0.747858	0.760471	-0.758676	-0.83323	-0.46097	0.737268	-0.442046	0.231087	-0.839418	0.661893	-0.784798	-0.757696	-0.737199	0.736839	-0.735217	-0.702326	-0.54107	0.734515	-0.516951	0.0477886	-0.848442	0.661919	-0.78249	-0.754704	-0.73525	0.730089	-0.734005
12	34	uniform cytoplasm	0.264644	-0.877461	-0.230286	0.463393	0.720638	-0.182034	1.06878	0.927424	0.727332	-0.459132	0.314347	-0.331299	1.37153	-0.716064	-0.199807	0.471861	0.613952	-0.0473886	0.87951	0.789195	0.601454	-0.25695	0.188122	-0.478767	1.2861	-0.671711	-0.145327	0.527237	0.590946	-0.0944194	0.825614	0.753207	0.595738	-0.275932	0.24601	-0.503701	1.21565	-0.66118	-0.110604	0.623938	0.556572	-0.18726	0.789766	0.746377	0.618015	-0.35234	0.349027
12	35	uniform cytoplasm	0.233446	0.0451568	-0.096369	0.396413	0.898747	0.0271927	0.542196	0.0925983	0.0852488	-0.00201987	0.0917348	-0.0102757	0.694038	0.111125	-0.13987	0.508209	1.01617	0.163202	0.516221	0.0265148	-0.00504107	0.112264	-0.0456632	-0.324005	0.726862	0.127306	-0.092785	0.630079	1.05125	0.199365	0.503505	0.0119783	-0.0258958	0.151342	-0.0786138	-0.499677	0.714691	0.130817	-0.0958853	0.747075	0.983397	0.198014	0.464269	0.00684612	-0.028231	0.155668	-0.0740229
12	36	ER	0.100371	0.561156	-0.391433	0.590945	0.218433	0.610229	-0.189947	-0.515447	-0.544857	0.617925	-0.617077	-0.860875	0.097586	0.571966	-0.300005	0.523959	0.0496329	0.50955	-0.2686	-0.52612	-0.524014	0.551195	-0.509151	-0.596942	-0.0522955	0.569069	-0.243451	0.505646	0.00232448	0.465143	-0.285988	-0.521453	-0.505718	0.521202	-0.46103	-0.428756	-0.144546	0.564501	-0.19026	0.449248	-0.0270591	0.446737	-0.296485	-0.515863	-0.495999	0.509473	-0.43928
12	37	nucleoli	0.445427	1.07028	-0.45827	0.438838	-0.866732	0.865857	-1.04143	-1.17879	-1.10854	0.998611	-1.0355	-0.656119	-2.13869	1.04057	-0.391245	-0.0414115	-0.901624	0.812859	-0.999813	-1.13897	-1.06677	0.959131	-0.999437	-0.479173	-2.13622	1.02482	-0.3947	-0.915343	-0.905554	0.822757	-0.97804	-1.11902	-1.05473	0.962642	-1.02282	-0.343742	-2.09811	1.02298	-0.407674	-1.9413	-0.909442	0.853177	-0.965183	-1.11432	-1.05896	0.984226	-1.06625
12	38	mitochondria	0.386423	0.923378	-0.440045	0.44757	-0.780028	0.767024	-0.885561	-0.972114	-0.926931	0.865614	-0.863837	-0.644155	-1.16434	0.893794	-0.387783	0.301326	-0.781514	0.715167	-0.84799	-0.93585	-0.886448	0.824546	-0.822765	-0.494239	-1.18193	0.880905	-0.414655	0.0904727	-0.782228	0.71373	-0.832311	-0.921815	-0.875869	0.82066	-0.829373	-0.36792	-1.20992	0.875739	-0.447945	-0.174434	-0.772565	0.726186	-0.817865	-0.91388	-0.873028	0.828963	-0.846758
12	39	Golgi	0.247852	-1.03096	0.60397	-1.31897	-0.285679	-1.17274	0.218612	0.990658	1.02465	-1.15908	1.15842	1.42489	0.322358	-1.17269	0.382066	-1.10296	-0.300138	-1.17482	0.224897	1.06686	1.07428	-1.26117	1.17085	1.39768	0.476348	-1.18469	0.251611	-0.794949	-0.302101	-1.10336	0.220476	1.05783	1.04437	-1.22707	1.09273	1.24651	0.617555	-1.17835	0.0972048	-0.338455	-0.30111	-1.01815	0.218354	1.03964	1.01022	-1.17619	1.0038
12	40	nucleoli	0.245796	0.998281	-0.448544	0.35542	-0.907314	0.817616	-0.994716	-1.07781	-1.0214	0.933602	-0.949561	-0.511991	-1.67402	0.959105	-0.368709	-0.25565	-0.919848	0.753968	-0.953195	-1.02793	-0.968484	0.882722	-0.893013	0.0325427	-1.7139	0.94159	-0.347774	-1.33961	-0.91713	0.754016	-0.932636	-1.00723	-0.953737	0.878332	-0.901036	0.441184	-1.75241	0.930136	-0.317892	-2.62565	-0.916156	0.768485	-0.91922	-0.991808	-0.946406	0.883543	-0.915465
12	41	Golgi	0.171359	-0.25363	0.0215138	-0.428036	-0.350911	-0.322404	-0.120528	0.283319	0.291736	-0.341189	0.386426	0.73175	0.288082	-0.310706	-0.0497422	-0.292074	-0.334352	-0.295149	-0.11061	0.309037	0.300068	-0.375364	0.374624	0.688512	0.365332	-0.30638	-0.100101	-0.155291	-0.320326	-0.256866	-0.112769	0.292975	0.276663	-0.351914	0.336877	0.599952	0.416407	-0.300802	-0.144097	0.0326314	-0.272162	-0.231585	-0.092481	0.28294	0.264795	-0.336565	0.318436
12	42	nucleoplasm and cytoplasm	0.0996902	0.086005	-0.013109	-0.077322	0.120382	-0.00165556	-0.0128826	-0.0358946	-0.0203088	0.00713236	0.0658883	0.329082	0.204404	0.029743	0.0364918	0.0816733	0.273678	-0.0556019	0.0923227	0.0412281	0.0473116	-0.0455635	0.114209	0.174646	0.317076	0.0106311	-0.00663867	0.277883	0.292989	-0.041928	0.0994717	0.0539102	0.049827	-0.0459078	0.0964459	0.0313993	0.361196	0.00644578	-0.0774612	0.478608	0.292703	-0.023814	0.0874836	0.050166	0.0415797	-0.0390571	0.0772015
12	43	mitochondria	0.192448	-0.00842331	-0.188428	0.0420326	-0.414769	0.0345708	-0.211445	0.0542324	0.0348341	-0.0207468	0.0554834	0.243976	0.432931	-0.000762085	-0.154288	-0.0148516	-0.408271	0.0424063	-0.214837	0.0473486	0.0261765	-0.0201117	0.0610366	0.303909	0.407188	-0.00813711	-0.130551	-0.120159	-0.413278	0.00119921	-0.221581	0.050838	0.0371095	-0.0519393	0.107491	0.411512	0.361258	-0.0186144	-0.0834808	-0.234165	-0.417633	-0.0354289	-0.229816	0.0547672	0.0473706	-0.0796556	0.150873
12	44	nucleoplasm and cytoplasm	0.14962	-0.046034	-0.10562	0.364839	0.500247	-0.0395211	0.441393	0.121671	0.117532	-0.0692294	0.0885693	-0.10592	0.332339	0.0159033	-0.169932	0.48853	0.589348	0.111178	0.420374	0.0700857	0.0331066	0.0513387	-0.0525747	-0.401496	0.369233	0.0378624	-0.205582	0.662698	0.607016	0.173291	0.406228	0.0513865	-0.000378929	0.110274	-0.114567	-0.639955	0.379752	0.0467426	-0.281949	0.800474	0.564732	0.195438	0.374635	0.0404452	-0.0149499	0.131779	-0.141588
12	45	nucleoli and cytoplasm	0.342744	-0.436828	-0.29869	0.343433	-0.190596	0.00153978	0.230307	0.430663	0.314134	-0.182916	0.0817824	-0.264763	0.701662	-0.326041	-0.287606	0.400847	-0.233005	0.0971552	0.152052	0.338123	0.226883	-0.0509511	-0.0140356	-0.421795	0.655312	-0.292378	-0.288192	0.435644	-0.266143	0.0795319	0.108956	0.306272	0.212766	-0.0528665	0.00678215	-0.502742	0.61707	-0.28657	-0.27183	0.432021	-0.243433	0.0200958	0.11424	0.304889	0.230735	-0.102517	0.0738099
12	47	structured cytoplasm	0.333626	-0.295742	0.813274	-1.0184	-0.0986214	-0.547957	0.0856031	0.390486	0.451782	-0.461832	0.639081	1.14923	0.142406	-0.42858	0.615954	-0.570685	0.0756312	-0.621626	0.225468	0.514504	0.550735	-0.595858	0.717663	1.09465	0.329543	-0.478583	0.526239	-0.226707	0.171728	-0.615057	0.279067	0.552962	0.571813	-0.624693	0.708279	0.932587	0.465257	-0.481276	0.422906	0.110642	0.205802	-0.583091	0.294005	0.548546	0.557272	-0.606624	0.6636
12	48	ER	0.195787	0.490265	-0.409993	0.512179	-0.442268	0.567549	-0.447995	-0.458054	-0.493827	0.556764	-0.553299	-0.71788	0.162074	0.499713	-0.355399	0.447067	-0.507412	0.511383	-0.479215	-0.464885	-0.479911	0.526023	-0.506648	-0.612017	0.0729894	0.496517	-0.344279	0.36053	-0.49968	0.466909	-0.472971	-0.460746	-0.463636	0.490872	-0.4563	-0.469332	-0.0196121	0.490059	-0.356468	0.310345	-0.500477	0.437195	-0.471852	-0.453773	-0.450856	0.466123	-0.422705
13	1	nucleoplasm	0	0.595163	-0.390084	0.5297	-0.0130691	0.569515	-0.371885	-0.623712	-0.612777	0.595217	-0.613135	-0.642577	-0.411085	0.610577	-0.333948	0.547073	-0.000775675	0.572457	-0.370556	-0.635243	-0.624484	0.617288	-0.627242	-0.761659	-0.431442	0.611109	-0.316673	0.599058	-0.0154426	0.579237	-0.374577	-0.633369	-0.623801	0.626478	-0.634379	-0.798769	-0.455468	0.613516	-0.303084	0.605362	-0.0220746	0.588809	-0.376373	-0.633225	-0.625285	0.636866	-0.642421
13	2	structured cytoplasm	0.111672	0.049267	-0.310567	0.609352	1.58959	0.401772	0.802958	0.0761195	-0.0509514	0.290639	-0.326661	-0.852902	0.962799	0.116955	-0.201448	0.591886	1.23608	0.319899	0.578644	0.0110668	-0.0728006	0.267238	-0.226523	-0.719062	0.802716	0.12869	-0.0749311	0.630375	1.08218	0.230187	0.494572	0.00143555	-0.0488477	0.196924	-0.116339	-0.550413	0.685362	0.122155	0.0666325	0.642097	1.0272	0.151868	0.461068	0.0105113	-0.020768	0.135758	-0.0218843
13	3	nucleoli and cytoplasm	0.199053	0.162541	-0.297707	0.445778	0.00748569	0.266166	0.014757	-0.101386	-0.140221	0.208332	-0.200881	-0.326632	0.412657	0.210659	-0.276245	0.467344	-0.0391079	0.318791	-0.0418051	-0.146101	-0.185365	0.276317	-0.262776	-0.469536	0.393111	0.223583	-0.266374	0.52888	-0.0424762	0.302009	-0.0523007	-0.157802	-0.187363	0.271733	-0.243493	-0.492062	0.341511	0.225204	-0.246999	0.538752	-0.0265751	0.268295	-0.0498425	-0.157517	-0.177445	0.246928	-0.204191
13	4	cytoskeleton	0.223623	-1.1965	0.968474	-1.3984	-0.0820286	-1.38527	0.484746	1.1839	1.25085	-1.34493	1.3864	1.47517	0.520665	-1.28027	0.708507	-1.15203	-0.0526035	-1.35138	0.533443	1.23156	1.26938	-1.39281	1.36655	1.44597	0.654293	-1.29987	0.596324	-0.930135	-0.0423791	-1.30996	0.544268	1.23937	1.25734	-1.38063	1.32589	1.36186	0.767843	-1.30272	0.555195	-0.603813	0.0129593	-1.27159	0.57478	1.23722	1.24497	-1.35846	1.29009
13	5	cytoskeleton	0.0958177	-0.64542	-0.126865	0.448174	1.00252	-0.294891	1.24433	0.702813	0.609478	-0.455172	0.348367	-0.161802	0.909545	-0.499623	-0.0754013	0.451345	0.941276	-0.142086	1.07227	0.581635	0.486664	-0.270849	0.223934	-0.305334	0.84926	-0.462281	0.0949076	0.479037	1.01981	-0.186486	1.06987	0.55794	0.488468	-0.277365	0.281104	-0.304402	0.790556	-0.456335	0.268118	0.498064	1.00602	-0.254772	1.02397	0.553351	0.50222	-0.320327	0.354249
13	6	nucleoplasm	0.205502	0.755578	-0.400893	0.604233	0.20331	0.669651	-0.337864	-0.742301	-0.723915	0.722577	-0.699173	-0.729728	-0.297472	0.756666	-0.324026	0.593083	0.165582	0.661127	-0.356485	-0.746378	-0.727415	0.732693	-0.711247	-0.887913	-0.327457	0.750578	-0.262114	0.611553	0.185087	0.65765	-0.349191	-0.737279	-0.718628	0.731393	-0.709009	-0.91054	-0.36471	0.750167	-0.217805	0.612152	0.183057	0.662778	-0.348872	-0.734458	-0.718077	0.736144	-0.713024
13	7	structured cytoplasm	0.605599	-1.41871	2.04704	-1.92699	0.385624	-1.74508	0.96517	1.41312	1.52383	-1.5896	1.69444	1.52241	0.451979	-1.57896	2.18556	-1.72422	0.674182	-1.97993	1.32651	1.63145	1.7529	-1.75705	1.88189	1.50594	0.660002	-1.63696	1.78563	-1.4218	0.562125	-1.99139	1.29488	1.67454	1.77713	-1.78587	1.8537	1.42159	0.822776	-1.65467	1.87628	-0.910602	0.675665	-2.0291	1.40396	1.71227	1.80955	-1.79963	1.86106
13	8	ER	0.142113	0.156601	-0.371022	0.5393	0.044845	0.433757	0.0197266	-0.0915087	-0.187916	0.353678	-0.374041	-0.700067	0.63511	0.199724	-0.308049	0.510071	-0.0536861	0.356927	-0.0651865	-0.12509	-0.186278	0.309853	-0.29462	-0.565715	0.520675	0.207024	-0.265819	0.493288	-0.0653158	0.278977	-0.0807247	-0.130148	-0.167136	0.245697	-0.205883	-0.412033	0.418122	0.203465	-0.228189	0.447032	-0.0754754	0.219565	-0.0923006	-0.126507	-0.149578	0.20014	-0.139492
13	9	plasma membrane	0.0857017	0.0402167	-0.228743	0.463598	0.532286	0.146739	0.348501	0.0683013	0.0221557	0.0726128	-0.0401132	-0.235578	0.709267	0.100502	-0.258402	0.561955	0.511635	0.256098	0.276867	0.00844127	-0.0532945	0.186598	-0.163425	-0.520963	0.721279	0.120139	-0.281593	0.716657	0.494791	0.273459	0.25317	-0.0110983	-0.0695142	0.211745	-0.182896	-0.686107	0.69459	0.125344	-0.290742	0.794847	0.502963	0.255812	0.241829	-0.0171294	-0.0673101	0.199099	-0.159377
13	10	nucleoplasm	0.146748	0.973122	-0.456455	0.61523	-0.530869	0.813662	-0.806468	-1.03693	-0.986805	0.918017	-0.939269	-1.01057	-1.36099	0.949479	-0.403444	0.578714	-0.561975	0.76475	-0.78493	-1.00976	-0.955891	0.882812	-0.904273	-0.980184	-1.39371	0.938394	-0.42524	0.561786	-0.556153	0.767124	-0.768266	-0.996142	-0.946029	0.882821	-0.917149	-0.973276	-1.39942	0.937924	-0.475686	0.471107	-0.562175	0.788721	-0.760477	-0.993636	-0.949366	0.899483	-0.948421
13	11	ER	0.13781	-0.446233	0.262914	-0.443125	-0.0851378	-0.509369	0.149931	0.458267	0.474964	-0.523358	0.55318	0.708811	0.420996	-0.467934	0.126603	-0.341094	-0.083922	-0.461966	0.138326	0.45144	0.455608	-0.521645	0.509989	0.647339	0.482504	-0.461684	0.0987882	-0.201109	-0.0692633	-0.430546	0.140105	0.437355	0.435714	-0.499193	0.48077	0.598376	0.514225	-0.465092	0.0708307	-0.0234536	-0.0594714	-0.417128	0.144877	0.438016	0.433977	-0.491253	0.47275
13	12	nucleoplasm and cytoplasm	0.136367	-0.00371946	-0.133129	0.354586	0.333505	0.0259184	0.285752	0.0696509	0.0531826	-0.00690672	0.0304978	-0.0472767	0.341128	0.0457546	-0.187507	0.488854	0.452112	0.141899	0.279769	0.0352227	-0.00486762	0.0916376	-0.0824733	-0.327482	0.399842	0.0632001	-0.242005	0.671279	0.423255	0.194659	0.247189	0.0175741	-0.0331506	0.140901	-0.139259	-0.558923	0.413084	0.0705434	-0.290115	0.794889	0.457323	0.210294	0.246359	0.0110808	-0.0405864	0.15686	-0.15605
13	13	ERGIC	0.396447	-1.08857	0.129221	0.401043	2.22689	-0.78194	2.23159	1.27064	1.17494	-0.985907	0.917981	0.139499	1.42056	-0.917652	0.0854043	0.473819	2.23466	-0.497725	2.03052	1.1257	0.989015	-0.723279	0.677524	-0.138828	1.3893	-0.864505	0.203775	0.591092	2.21521	-0.492287	1.94637	1.07979	0.958396	-0.687119	0.692217	-0.221721	1.33725	-0.854728	0.359742	0.677591	2.22535	-0.57911	1.90633	1.0735	0.980416	-0.738959	0.79011
13	14	ER	0.071393	0.427776	-0.363384	0.419225	-0.333649	0.45668	-0.348102	-0.382008	-0.4027	0.441414	-0.414526	-0.369161	0.151643	0.44215	-0.307051	0.392505	-0.318649	0.433714	-0.345156	-0.390694	-0.39976	0.439816	-0.399397	-0.351554	0.114579	0.442172	-0.287424	0.354181	-0.32314	0.402411	-0.348067	-0.390883	-0.390085	0.420256	-0.366112	-0.269861	0.048046	0.437187	-0.263038	0.268022	-0.316624	0.376312	-0.345465	-0.385123	-0.379242	0.401807	-0.334249
13	15	ER	0.276876	0.688146	-0.413221	0.522484	-0.501525	0.626337	-0.596785	-0.68931	-0.677889	0.668791	-0.661287	-0.67032	-0.473607	0.683062	-0.354455	0.470307	-0.525894	0.574617	-0.59423	-0.681429	-0.656441	0.637543	-0.620783	-0.59916	-0.529021	0.678172	-0.356785	0.443141	-0.525913	0.557493	-0.585772	-0.675881	-0.647025	0.627129	-0.608079	-0.546633	-0.574617	0.674768	-0.370671	0.390233	-0.512234	0.555605	-0.573631	-0.670486	-0.642074	0.626612	-0.607791
13	16	structured cytoplasm	0.274979	-0.313229	0.535846	-0.696518	0.193623	-0.511502	0.323444	0.417233	0.471483	-0.462475	0.630004	0.955384	0.389368	-0.383199	0.338769	-0.321264	0.444529	-0.502363	0.442678	0.474116	0.495518	-0.518777	0.63511	0.798143	0.535819	-0.402716	0.200723	-0.0296438	0.469236	-0.44345	0.433315	0.471927	0.469638	-0.504157	0.576637	0.602889	0.632072	-0.412701	0.133962	0.262762	0.492493	-0.418772	0.434748	0.471994	0.461188	-0.494688	0.549261
13	17	nucleoli	0.23973	0.968473	-0.447906	0.346971	-0.90667	0.801084	-0.974397	-1.03437	-0.983873	0.91306	-0.918946	-0.543446	-1.44017	0.924981	-0.364736	-0.402097	-0.936299	0.71814	-0.943108	-0.981085	-0.921315	0.841233	-0.832762	0.0822125	-1.52453	0.905939	-0.349304	-1.65436	-0.940193	0.711786	-0.926755	-0.961559	-0.905872	0.831005	-0.829265	0.531421	-1.60347	0.896718	-0.314748	-3.04775	-0.935959	0.723979	-0.91324	-0.950189	-0.902015	0.838705	-0.843348
13	18	nucleoli	0.373285	-0.103696	-0.389592	-0.365258	-0.924413	0.112071	-0.83022	-0.196539	-0.203443	-0.0658323	-0.138514	0.670371	-0.698495	0.000850973	-0.378844	-0.391851	-0.933886	0.213922	-0.82425	-0.312648	-0.318833	0.0518588	-0.251233	0.687772	-0.73761	0.0649467	-0.442271	-0.420406	-0.925721	0.296632	-0.816354	-0.366547	-0.382609	0.145287	-0.34123	0.633468	-0.703077	0.149158	-0.535682	-0.460901	-0.922555	0.388521	-0.81397	-0.421758	-0.444949	0.259392	-0.437518
13	19	nucleoli	0.197113	0.928042	-0.460328	0.356858	-0.952763	0.787516	-1.02278	-1.03877	-0.986327	0.876068	-0.914099	-0.479147	-1.69522	0.9089	-0.401087	-0.0723336	-0.965597	0.732591	-0.981287	-1.00663	-0.948832	0.838677	-0.868168	-0.0261786	-1.73988	0.908587	-0.41535	-0.86085	-0.960004	0.743389	-0.960479	-0.998803	-0.94587	0.851951	-0.890568	0.269047	-1.77475	0.914286	-0.436285	-1.7708	-0.954142	0.77072	-0.946536	-0.997816	-0.95214	0.876208	-0.925927
13	20	ER	0.127077	-0.800488	0.765902	-1.02884	-0.0765026	-1.00746	0.328922	0.855215	0.904746	-0.950307	1.05275	1.2155	0.478572	-0.901454	0.544667	-0.824649	-0.0534803	-1.02962	0.362755	0.925565	0.957882	-1.03052	1.07166	1.18027	0.612676	-0.933609	0.544382	-0.650197	0.0148411	-1.03326	0.409014	0.953953	0.978312	-1.0476	1.07592	1.1116	0.717337	-0.936255	0.432913	-0.329378	0.0242448	-1.00462	0.403399	0.945228	0.961799	-1.03731	1.0458
13	21	nucleoplasm	0.333927	0.96346	-0.459384	0.627134	-0.524356	0.826691	-0.806232	-1.01797	-0.976805	0.92964	-0.95467	-1.15997	-1.1728	0.939894	-0.406303	0.592807	-0.582531	0.768772	-0.792503	-0.991424	-0.942478	0.887215	-0.906771	-1.04618	-1.2344	0.929349	-0.430497	0.58178	-0.598512	0.76852	-0.782337	-0.979242	-0.932422	0.883582	-0.914453	-1.003	-1.26017	0.928172	-0.484308	0.530507	-0.609783	0.787663	-0.776264	-0.97602	-0.934336	0.896665	-0.941097
13	22	uniform cytoplasm	0.327527	-0.416481	-0.0152239	0.328918	0.731942	-0.310749	0.825545	0.546307	0.500179	-0.405243	0.42416	0.0799538	0.884532	-0.348255	-0.0478336	0.378912	0.70224	-0.177468	0.722163	0.489504	0.425856	-0.294203	0.31143	-0.0699597	0.883917	-0.32628	0.0264772	0.428488	0.680039	-0.191816	0.679402	0.469395	0.415376	-0.287126	0.336961	-0.0682908	0.831909	-0.327177	0.133509	0.431781	0.641064	-0.249917	0.639394	0.466917	0.429564	-0.324335	0.401389
13	23	vesicles	0.413652	0.800921	-0.432678	0.506634	-0.656869	0.712426	-0.750689	-0.824493	-0.802734	0.780653	-0.775049	-0.732441	-0.690435	0.784835	-0.382017	0.440176	-0.673627	0.658323	-0.731861	-0.803682	-0.772008	0.74225	-0.731442	-0.618954	-0.737881	0.775982	-0.400516	0.376999	-0.653854	0.647382	-0.711891	-0.793277	-0.760626	0.733743	-0.726947	-0.542318	-0.778623	0.773615	-0.443331	0.27403	-0.653072	0.656068	-0.704269	-0.789991	-0.76049	0.739697	-0.740239
13	24	mitochondria	0.220361	0.704997	-0.306368	0.425966	-0.0407358	0.632062	-0.467594	-0.689964	-0.684632	0.696262	-0.652085	-0.455834	-0.392093	0.66035	-0.125337	0.0503043	-0.205174	0.488876	-0.514233	-0.631451	-0.599933	0.581776	-0.490873	0.183315	-0.55101	0.630902	0.0317991	-0.394463	-0.267474	0.441373	-0.527226	-0.600493	-0.564952	0.540438	-0.433195	0.58884	-0.650408	0.599473	0.214835	-0.780366	-0.305968	0.413035	-0.531974	-0.569689	-0.537283	0.509714	-0.390472
13	25	cytoskeleton	0.24749	0.427914	-0.396137	0.530918	-0.171993	0.527899	-0.242418	-0.398384	-0.430996	0.50538	-0.509244	-0.746888	0.259438	0.468735	-0.332141	0.452937	-0.17932	0.528881	-0.262423	-0.440631	-0.459306	0.538423	-0.525503	-0.819012	0.1781	0.478474	-0.325221	0.417169	-0.172312	0.516718	-0.260543	-0.448374	-0.460074	0.532274	-0.512273	-0.872713	0.124158	0.482505	-0.359292	0.377883	-0.16514	0.511401	-0.258918	-0.450704	-0.459541	0.525705	-0.503671
13	26	nucleoplasm	0.900318	0.908603	-0.387806	0.385901	-0.572181	0.715854	-0.774671	-0.941862	-0.885868	0.824571	-0.789012	-0.319182	-1.03724	0.884446	-0.37293	0.479829	-0.535699	0.694317	-0.732647	-0.913938	-0.863319	0.802821	-0.784998	-0.49894	-0.977517	0.873252	-0.4114	0.568734	-0.5098	0.707163	-0.709554	-0.900755	-0.857112	0.810889	-0.809988	-0.600618	-0.955792	0.871223	-0.466633	0.557306	-0.520144	0.730507	-0.705418	-0.897671	-0.860533	0.828453	-0.8416
13	27	nucleoli	0.236008	-0.0289691	-0.305552	-0.222442	-0.754863	0.0308033	-0.6135	-0.144966	-0.133378	-0.0203805	-0.0927909	0.223418	-0.253758	0.0129324	-0.321855	-0.204352	-0.766741	0.121659	-0.614669	-0.20996	-0.206307	0.0576599	-0.188967	0.136572	-0.248827	0.0284312	-0.367528	-0.144694	-0.738479	0.16976	-0.587613	-0.218717	-0.2251	0.101324	-0.233847	0.0749236	-0.204853	0.0387105	-0.451466	-0.0312454	-0.728842	0.221333	-0.575097	-0.223022	-0.24064	0.144087	-0.279117
13	28	structured cytoplasm	0.401568	-0.129753	0.0755702	-0.140646	0.016366	-0.194857	0.131031	0.222933	0.231997	-0.211026	0.310503	0.562815	0.497421	-0.139444	-0.0180947	0.0956681	0.220923	-0.132909	0.221444	0.23458	0.217682	-0.200589	0.269612	0.401489	0.5939	-0.138785	-0.0565518	0.304783	0.278623	-0.0899699	0.235981	0.229943	0.199091	-0.175553	0.231601	0.223098	0.642685	-0.13684	-0.115655	0.518656	0.321259	-0.0696569	0.244517	0.223754	0.190322	-0.161313	0.209683
13	29	nucleoplasm and cytoplasm	0.415768	-1.63305	2.37273	-2.55033	0.312168	-2.10287	0.994436	1.5656	1.73311	-1.86517	1.98123	1.87805	0.186627	-1.79176	1.97432	-2.44244	0.463526	-2.18763	1.18961	1.67769	1.8328	-2.00057	2.04489	1.92362	0.364826	-1.84787	1.68286	-2.09626	0.443802	-2.16811	1.22091	1.71727	1.84425	-2.02323	2.00902	1.86933	0.561361	-1.85617	1.5866	-1.42701	0.562657	-2.12076	1.30593	1.72843	1.83194	-1.99514	1.94492
13	30	mitochondria	0.213401	0.491675	-0.408556	0.338105	-0.749307	0.542507	-0.660856	-0.493174	-0.514724	0.541109	-0.531233	-0.427409	-0.0386503	0.487994	-0.308902	-0.043869	-0.751556	0.445692	-0.645369	-0.483645	-0.473967	0.468042	-0.427368	-0.0412081	-0.192634	0.473177	-0.260777	-0.507774	-0.728927	0.39226	-0.622055	-0.467267	-0.448839	0.423665	-0.365143	0.224697	-0.285133	0.455768	-0.184632	-0.864209	-0.683164	0.355561	-0.589965	-0.446501	-0.425332	0.39223	-0.316667
13	31	cytoskeleton	0.466808	-2.29844	0.0467914	0.313206	1.10475	-1.39189	2.71548	2.23277	2.02304	-1.73825	1.30446	0.178469	1.61103	-1.95772	0.112967	0.295827	1.10686	-1.03441	2.47016	1.98299	1.76347	-1.32912	1.05828	0.0223661	1.50111	-1.86188	0.330234	0.269039	1.13326	-1.10202	2.39488	1.9153	1.74175	-1.32528	1.14899	0.0437477	1.42863	-1.83767	0.563186	0.255574	1.10613	-1.25449	2.32838	1.90163	1.77276	-1.41436	1.28886
13	32	focal	0.202632	-0.899845	0.153833	-0.913242	-0.429969	-0.748667	0.0113601	0.805296	0.80878	-0.896485	0.838578	1.01834	0.701621	-0.845027	0.0203168	-0.709412	-0.436197	-0.560754	0.00885447	0.740462	0.699618	-0.759633	0.68601	0.875105	0.763052	-0.845976	0.138351	-0.689672	-0.291195	-0.553246	0.113677	0.766438	0.721334	-0.740292	0.704736	0.788071	0.829685	-0.830323	0.087181	-0.592228	-0.327003	-0.496817	0.0806967	0.739177	0.686732	-0.69581	0.656236
13	33	nucleoli	0.168363	0.365631	-0.396481	0.242975	-0.674147	0.430342	-0.657727	-0.43989	-0.44809	0.390058	-0.433381	-0.221337	-0.159213	0.392677	-0.362348	0.211637	-0.697135	0.439009	-0.65525	-0.46885	-0.473379	0.418283	-0.455934	-0.236893	-0.197185	0.402086	-0.400664	0.203287	-0.70543	0.456495	-0.654775	-0.480701	-0.485652	0.436901	-0.475593	-0.238365	-0.224871	0.409781	-0.453106	0.133702	-0.707518	0.476219	-0.651395	-0.48622	-0.49417	0.459061	-0.494414
13	34	uniform cytoplasm	0.2931	-0.129255	-0.305355	-0.0256923	-0.394772	0.0874868	-0.223173	0.076607	0.0179131	-0.0493999	-0.0155261	0.0934472	0.35678	-0.056906	-0.303269	0.0263175	-0.455552	0.163648	-0.284674	-0.0161973	-0.067068	0.0323703	-0.101983	0.0723788	0.283366	-0.013786	-0.305308	0.0964306	-0.428863	0.174999	-0.280696	-0.0538331	-0.0948398	0.05022	-0.106584	0.126325	0.232717	0.0217759	-0.335456	0.145853	-0.443086	0.183247	-0.293583	-0.0786527	-0.11344	0.0685693	-0.107672
13	35	uniform cytoplasm	0.409414	-0.926394	0.840108	-0.235248	1.07326	-1.07347	1.3335	1.07564	1.13184	-1.04034	1.14445	0.832686	0.928266	-0.858984	0.538352	0.0616387	1.41261	-0.87342	1.41885	1.0382	1.03623	-0.922996	0.991381	0.605377	1.02463	-0.840463	0.518071	0.283306	1.56535	-0.797708	1.44698	1.03052	0.99982	-0.872975	0.937679	0.406214	1.07295	-0.835678	0.5408	0.472614	1.60356	-0.786391	1.43427	1.02531	0.990244	-0.861916	0.930904
13	36	ER	0.219466	-0.488016	-0.213954	0.441265	0.344574	-0.0888326	0.626063	0.527502	0.402178	-0.259798	0.161287	-0.361739	0.857702	-0.421226	-0.0680663	0.292839	0.250278	-0.219651	0.499069	0.491063	0.424698	-0.324842	0.293314	-0.0705108	0.696054	-0.412817	0.132989	0.124746	0.227531	-0.36462	0.462173	0.486939	0.462466	-0.415133	0.440302	0.194973	0.577394	-0.424513	0.354979	-0.0209222	0.194963	-0.478096	0.429891	0.494916	0.49474	-0.485889	0.551275
13	37	nucleoli	0.477371	1.04406	-0.461586	0.423674	-0.930433	0.851913	-1.06787	-1.16274	-1.09463	0.970648	-1.01514	-0.496463	-2.29571	1.04196	-0.399294	0.00695388	-0.955332	0.817082	-1.02353	-1.14571	-1.07317	0.963194	-1.01002	-0.51903	-2.26474	1.02789	-0.412991	-0.810064	-0.956182	0.830112	-1.00071	-1.12833	-1.0637	0.969873	-1.0392	-0.447018	-2.22243	1.02454	-0.440858	-1.80985	-0.957546	0.860612	-0.98639	-1.12185	-1.06657	0.990674	-1.08274
13	38	mitochondria	0.245955	0.0297279	-0.145383	-0.0602181	-0.424533	0.00946141	-0.269985	0.00481	-0.00354224	-0.0122013	0.0497837	0.301595	0.219101	-0.0112512	-0.0943927	-0.205876	-0.424641	-0.0400329	-0.268399	0.03734	0.0375044	-0.075666	0.114904	0.513895	0.181276	-0.0259255	-0.0225582	-0.413843	-0.412085	-0.0758197	-0.264164	0.0459019	0.0520344	-0.106751	0.16261	0.699935	0.133456	-0.0434046	0.0697557	-0.556688	-0.401986	-0.100838	-0.26196	0.0567939	0.0656147	-0.130502	0.201572
13	39	Golgi	0.351649	-1.39883	0.592738	-0.915381	0.326535	-1.41359	0.952535	1.39004	1.39627	-1.46507	1.39996	1.2901	0.747896	-1.43392	0.381506	-0.721876	0.347654	-1.27834	0.909609	1.39895	1.36413	-1.43087	1.30954	1.1869	0.866651	-1.41412	0.275004	-0.432893	0.330157	-1.18098	0.873607	1.37012	1.31197	-1.36749	1.22013	1.01476	0.964764	-1.42849	0.205762	-0.081255	0.359829	-1.15722	0.876072	1.37851	1.31218	-1.35771	1.19475
13	40	nucleoli	0.229366	1.0396	-0.461649	0.353962	-0.970377	0.839845	-1.0464	-1.13283	-1.06758	0.965568	-0.989435	-0.544732	-1.92032	0.998569	-0.394021	-0.262242	-0.973008	0.775703	-0.996352	-1.0813	-1.01341	0.913176	-0.933499	-0.0153102	-1.95184	0.981468	-0.401322	-1.35956	-0.967455	0.780811	-0.973554	-1.0614	-1.00053	0.915078	-0.950797	0.331262	-1.96937	0.974218	-0.411851	-2.66341	-0.964318	0.804509	-0.959475	-1.05108	-0.999138	0.929662	-0.980434
13	41	Golgi	0.266995	-0.264303	-0.243521	-0.595832	-0.795672	0.0917214	-0.606613	0.106035	0.0486101	-0.0680267	-0.00786628	0.617608	0.279412	-0.155755	-0.248818	-0.508829	-0.76857	0.193814	-0.574847	0.0104993	-0.04834	0.0890331	-0.131818	0.271888	0.361803	-0.108005	-0.298407	-0.646563	-0.778558	0.235268	-0.577691	-0.028603	-0.087179	0.138668	-0.180981	0.0773236	0.375852	-0.114717	-0.270576	-0.790193	-0.697094	0.212955	-0.516525	-0.00505562	-0.0600124	0.115971	-0.145876
13	42	nucleoplasm and cytoplasm	0.137161	-0.26889	0.203961	-0.0964664	0.600451	-0.288337	0.516141	0.381927	0.358968	-0.320721	0.405927	0.349029	0.657741	-0.316932	0.172586	-0.00311089	0.697784	-0.290808	0.518818	0.408271	0.378472	-0.335209	0.390978	0.148593	0.732861	-0.330126	0.100399	0.173843	0.662639	-0.278493	0.474044	0.396945	0.366073	-0.32846	0.367315	0.0313722	0.752549	-0.34134	0.068071	0.38975	0.648185	-0.292936	0.45538	0.397776	0.373232	-0.341644	0.378155
13	43	mitochondria	0.0944557	-0.0936167	-0.0340958	-0.250176	-0.440727	-0.133166	-0.228511	0.12141	0.127199	-0.153889	0.195652	0.486312	0.149283	-0.135963	-0.00998867	-0.332855	-0.407194	-0.168589	-0.200466	0.158011	0.160093	-0.213596	0.250964	0.617163	0.138652	-0.162024	0.0962007	-0.546785	-0.361625	-0.219046	-0.181468	0.176583	0.183569	-0.257499	0.311842	0.778197	0.107882	-0.199178	0.255712	-0.67675	-0.323611	-0.295783	-0.150019	0.21093	0.227346	-0.31894	0.400172
13	44	nucleoplasm and cytoplasm	0.152019	0.0959344	-0.161463	0.421457	0.786437	0.10613	0.470172	0.00644391	-0.0103765	0.0790768	-0.0381859	-0.174362	0.433193	0.148202	-0.198122	0.531493	0.831055	0.225474	0.422423	-0.0387268	-0.080254	0.182844	-0.158767	-0.474854	0.474928	0.164705	-0.23189	0.714333	0.810774	0.269491	0.391861	-0.0547919	-0.104305	0.2267	-0.205446	-0.701678	0.477526	0.168943	-0.279514	0.84155	0.785251	0.273622	0.369223	-0.0591891	-0.107288	0.232127	-0.210936
13	45	nucleoli and cytoplasm	0.249777	-0.244547	-0.33852	0.487804	-0.0946026	0.160307	0.177043	0.235941	0.124767	0.00353294	-0.100384	-0.480353	0.590398	-0.150171	-0.291715	0.472544	-0.152547	0.214964	0.09138	0.159618	0.0632775	0.112598	-0.16179	-0.564528	0.520115	-0.1236	-0.275414	0.498084	-0.177516	0.176101	0.060591	0.137472	0.0622807	0.0909024	-0.115781	-0.553331	0.456646	-0.118022	-0.253708	0.460544	-0.194271	0.122988	0.0394305	0.131792	0.0731281	0.0455474	-0.0545251
13	47	structured cytoplasm	0.565499	-1.29713	0.988605	-0.768891	0.716507	-1.49971	1.34858	1.37298	1.44449	-1.43027	1.47559	1.12868	0.750749	-1.30167	0.704471	-0.476651	0.969811	-1.36397	1.43643	1.38681	1.40618	-1.38511	1.38106	0.984118	0.874713	-1.2937	0.565661	-0.189291	0.951506	-1.25241	1.38859	1.36559	1.34957	-1.32292	1.28459	0.795463	0.960876	-1.29727	0.507426	0.129012	0.980908	-1.21903	1.38025	1.36352	1.33563	-1.30262	1.24829
13	48	ER	0.121037	0.20313	-0.291332	0.425914	0.0139953	0.315878	-0.0594707	-0.125262	-0.184201	0.260502	-0.227794	-0.3043	0.522997	0.19472	-0.191003	0.305937	-0.0335633	0.221485	-0.110524	-0.104711	-0.137512	0.191637	-0.126633	-0.0467955	0.429587	0.181529	-0.0886017	0.161668	-0.0696146	0.143079	-0.136203	-0.0944197	-0.108863	0.133685	-0.0381518	0.222625	0.313224	0.159959	0.0424573	0.00486428	-0.0857152	0.07768	-0.147745	-0.0763307	-0.0806803	0.081738	0.0395855
14	1	nucleoplasm	0	0.595163	-0.390084	0.5297	-0.0130691	0.569515	-0.371885	-0.623712	-0.612777	0.595217	-0.613135	-0.642577	-0.411085	0.610577	-0.333948	0.547073	-0.000775675	0.572457	-0.370556	-0.635243	-0.624484	0.617288	-0.627242	-0.761659	-0.431442	0.611109	-0.316673	0.599058	-0.0154426	0.579237	-0.374577	-0.633369	-0.623801	0.626478	-0.634379	-0.798769	-0.455468	0.613516	-0.303084	0.605362	-0.0220746	0.588809	-0.376373	-0.633225	-0.625285	0.636866	-0.642421
14	2	structured cytoplasm	0.225441	-0.491611	-0.310697	0.574179	0.855093	0.140667	1.01082	0.586099	0.390435	-0.0736596	-0.0506141	-0.716739	1.17898	-0.367752	-0.214115	0.544141	0.669695	0.0613862	0.793628	0.480314	0.345921	-0.0782797	0.0451337	-0.571399	1.01588	-0.339352	-0.0674096	0.533053	0.664569	-0.086579	0.754426	0.462472	0.379278	-0.190305	0.211084	-0.374239	0.896719	-0.341047	0.10226	0.467981	0.594489	-0.205666	0.696404	0.463036	0.411452	-0.278608	0.341544
14	3	nucleoli and cytoplasm	0.307146	0.386332	-0.356838	0.461802	-0.205202	0.424737	-0.250454	-0.338135	-0.357767	0.401043	-0.375375	-0.427311	0.281382	0.419555	-0.332703	0.499887	-0.229728	0.454788	-0.276513	-0.372958	-0.391268	0.448689	-0.423636	-0.58731	0.259204	0.426679	-0.335241	0.54173	-0.246914	0.445021	-0.285515	-0.380683	-0.392552	0.446761	-0.414215	-0.634062	0.20934	0.428814	-0.34729	0.564673	-0.230635	0.42931	-0.27666	-0.380799	-0.387176	0.436265	-0.394848
14	4	cytoskeleton	0.320179	-1.88566	0.720634	-0.449115	0.662386	-1.88895	1.71649	1.88859	1.94459	-1.92302	1.80502	1.05403	1.25997	-1.73756	0.592031	-0.187829	0.965913	-1.59323	1.88631	1.82602	1.81061	-1.7122	1.61188	0.877496	1.30947	-1.68799	0.610535	-0.0353483	0.980489	-1.47737	1.85104	1.79119	1.74287	-1.62125	1.5408	0.734608	1.33177	-1.67073	0.638252	0.174211	0.9771	-1.45301	1.80998	1.77266	1.71928	-1.59208	1.52021
14	5	cytoskeleton	0.112159	-0.591258	-0.176943	0.433582	0.702235	-0.24525	0.914212	0.694708	0.590932	-0.445545	0.394502	-0.105997	1.22074	-0.464759	-0.170864	0.471688	0.619857	-0.0746083	0.766384	0.577269	0.467421	-0.254367	0.233032	-0.301886	1.17322	-0.425296	-0.0968663	0.526653	0.613131	-0.0784727	0.726194	0.541564	0.444341	-0.229779	0.250731	-0.364095	1.11306	-0.419133	-0.00560777	0.572015	0.653771	-0.130008	0.72174	0.538081	0.456582	-0.269326	0.316692
14	6	nucleoplasm	0.622411	-0.0147774	-0.344681	0.594616	0.872635	0.340835	0.575134	0.113791	-0.00342996	0.21699	-0.257313	-0.759591	0.989069	0.0693539	-0.251372	0.594012	0.866716	0.349859	0.494234	0.0363103	-0.0572864	0.284096	-0.267171	-0.804716	0.880387	0.085881	-0.14451	0.638109	0.84688	0.289469	0.461096	0.0243612	-0.0437097	0.241169	-0.187011	-0.726184	0.779883	0.0822293	0.0192432	0.6278	0.874725	0.21233	0.467849	0.036684	-0.011948	0.174246	-0.083184
14	7	structured cytoplasm	1	-2.31346	3.14347	-2.59066	0.668824	-3.02133	1.75042	2.31823	2.5482	-2.60882	2.76105	2.11885	0.548845	-2.46222	2.70635	-2.32992	0.837759	-3.13839	2.01162	2.47344	2.6947	-2.74169	2.83737	2.15607	0.78022	-2.51407	2.47929	-1.87801	0.885736	-3.12598	2.09317	2.53302	2.7226	-2.76154	2.80126	2.08281	1.00312	-2.5155	2.08628	-1.14382	0.817856	-3.01975	2.04727	2.51854	2.66562	-2.71136	2.66719
14	8	ER	0.189496	0.0242265	-0.255928	0.321838	0.211105	0.215529	0.173192	0.0398861	-0.0340948	0.152434	-0.164417	-0.282887	0.460578	0.0291755	-0.208835	0.313673	0.0739679	0.150044	0.0637801	0.0217194	-0.024778	0.0886155	-0.0792019	-0.123547	0.361749	0.0416803	-0.148252	0.305482	0.0282554	0.0913721	0.026193	0.00534791	-0.0205617	0.0442829	-0.0105182	0.0241294	0.278492	0.0387468	-0.0521412	0.242856	0.00786781	0.0358446	0.0096308	0.00466699	-0.00709681	0.00234373	0.0533594
14	9	plasma membrane	0.309048	0.71208	-0.39857	0.599291	-0.0288722	0.622257	-0.406954	-0.70238	-0.683031	0.673576	-0.660495	-0.782383	-0.490004	0.714677	-0.368358	0.660753	0.0115329	0.621569	-0.390746	-0.702572	-0.685657	0.682814	-0.678554	-1.00662	-0.483392	0.713753	-0.408505	0.803739	-0.062364	0.629775	-0.412618	-0.703563	-0.688325	0.691012	-0.696403	-1.14891	-0.499953	0.713548	-0.441735	0.861952	-0.0247645	0.631152	-0.396512	-0.700513	-0.685518	0.691454	-0.698878
14	10	nucleoplasm	0.150509	0.843277	-0.433141	0.603636	-0.270071	0.749902	-0.598822	-0.860365	-0.837408	0.820391	-0.822501	-0.926173	-0.61532	0.833144	-0.366695	0.567331	-0.320876	0.696717	-0.60174	-0.850092	-0.816416	0.787956	-0.77878	-0.857839	-0.693369	0.824849	-0.355742	0.54581	-0.345692	0.686524	-0.600228	-0.840126	-0.805134	0.77976	-0.771856	-0.77479	-0.744258	0.823433	-0.365551	0.496957	-0.36231	0.694973	-0.599821	-0.836818	-0.804479	0.786957	-0.783243
14	11	ER	0.113571	-0.189648	0.015299	-0.4565	-0.380938	-0.234637	-0.143458	0.225474	0.225715	-0.261351	0.318303	0.707705	0.266195	-0.266372	-0.0354488	-0.31649	-0.322542	-0.245127	-0.109432	0.27433	0.26022	-0.330352	0.349405	0.698165	0.334667	-0.279482	-0.0384376	-0.252216	-0.315122	-0.247046	-0.115023	0.270946	0.255202	-0.341059	0.356031	0.699715	0.35288	-0.291623	0.00806579	-0.193055	-0.278072	-0.268831	-0.0972899	0.27436	0.264878	-0.362052	0.386707
14	12	nucleoplasm and cytoplasm	0.134024	0.251109	-0.256746	0.395995	0.255012	0.264632	0.0317751	-0.191588	-0.199313	0.23793	-0.198517	-0.183707	0.330993	0.302734	-0.300028	0.542624	0.226255	0.379883	-0.0149674	-0.246861	-0.278022	0.348451	-0.33291	-0.554071	0.370144	0.315973	-0.303246	0.71094	0.441526	0.410259	0.0547585	-0.251967	-0.28997	0.38596	-0.369971	-0.828347	0.388776	0.323887	-0.36731	0.838089	0.386689	0.432446	0.0279843	-0.26214	-0.302997	0.407896	-0.396852
14	13	ERGIC	0.380845	0.0256826	-0.14842	0.342641	0.248793	0.0389631	0.233891	0.0608058	0.0440195	0.0034448	0.0414476	-0.0580717	0.467922	0.0606196	-0.1745	0.413082	0.215119	0.127925	0.170435	0.0285468	-0.0041038	0.0749217	-0.0460336	-0.261138	0.486741	0.0730613	-0.146206	0.497791	0.250927	0.126027	0.174139	0.0201163	-0.00938116	0.0842988	-0.0415148	-0.331629	0.456749	0.0699753	-0.0995644	0.540059	0.261046	0.102401	0.166984	0.0227648	0.000834126	0.0699282	-0.0126691
14	14	ER	0.0939082	0.566249	-0.371394	0.496485	-0.264326	0.541156	-0.401151	-0.529674	-0.533174	0.558892	-0.527636	-0.532953	-0.00726351	0.575439	-0.334513	0.503502	-0.289862	0.526757	-0.413799	-0.538145	-0.535715	0.559671	-0.527129	-0.587448	-0.0382509	0.575301	-0.339339	0.52548	-0.300967	0.509882	-0.416198	-0.538526	-0.530631	0.549989	-0.512311	-0.551898	-0.099298	0.573674	-0.353261	0.517695	-0.305883	0.49869	-0.415773	-0.536	-0.525396	0.542207	-0.498775
14	15	ER	0.0882163	-0.140339	-0.33672	0.52956	0.171641	0.275689	0.290528	0.207359	0.0697797	0.137617	-0.191804	-0.643168	0.933287	-0.0807176	-0.239286	0.447682	0.0695008	0.153478	0.175553	0.166459	0.0840232	0.0648928	-0.0587229	-0.374886	0.77161	-0.0740387	-0.156935	0.399636	0.0403015	0.0430789	0.142271	0.162467	0.111871	-0.0201794	0.0634149	-0.161894	0.656587	-0.0858593	-0.0668922	0.324823	0.0192161	-0.0423389	0.120984	0.172914	0.141027	-0.0856514	0.156677
14	16	structured cytoplasm	0.365508	-0.0722472	0.0969121	-0.440763	-0.319892	-0.179062	-0.1362	0.135153	0.163029	-0.172528	0.277986	0.657785	0.322959	-0.11726	0.148552	-0.0983956	0.115357	-0.215162	0.144326	0.219148	0.231863	-0.230137	0.339443	0.57947	0.458659	-0.137433	0.134335	0.153888	0.272751	-0.195312	0.211877	0.239958	0.237994	-0.232997	0.325627	0.415498	0.535854	-0.163625	0.20642	0.366267	0.470557	-0.229454	0.306734	0.275442	0.2735	-0.260596	0.363486
14	17	nucleoli	0.331319	0.687428	-0.462394	0.165856	-0.979011	0.674193	-0.992057	-0.845195	-0.822527	0.669163	-0.753104	-0.0914852	-1.2873	0.838187	-0.423804	0.00614442	-0.98531	0.732024	-0.961207	-0.923721	-0.886161	0.814056	-0.84364	-0.278973	-1.26274	0.857168	-0.478888	-0.447965	-0.976181	0.760186	-0.940318	-0.932894	-0.898374	0.852528	-0.894437	-0.481459	-1.2247	0.838018	-0.545414	-1.10494	-0.962578	0.775198	-0.91852	-0.914955	-0.88869	0.854276	-0.911601
14	18	nucleoli	0.334336	-0.409808	-0.406468	-0.141928	-0.933895	0.0691574	-0.793197	-0.0766554	-0.100602	-0.165165	-0.157084	0.390507	-0.704559	-0.223303	-0.394025	-0.135205	-0.949183	0.23809	-0.784057	-0.215606	-0.255176	0.0596485	-0.317719	0.28445	-0.671504	-0.121493	-0.459614	-0.171784	-0.942379	0.34238	-0.775567	-0.277243	-0.328159	0.196899	-0.417421	0.201815	-0.655492	-0.0594988	-0.55694	-0.245293	-0.938534	0.42917	-0.765742	-0.314358	-0.3748	0.306262	-0.501928
14	19	nucleoli	0.332226	0.591623	-0.452444	-0.0886921	-0.986189	0.591165	-1.04282	-0.849659	-0.815361	0.523294	-0.673681	0.667579	-2.03436	0.84021	-0.406343	-0.357272	-0.997419	0.699185	-1.01637	-0.980608	-0.92835	0.753379	-0.811001	0.841426	-2.05416	0.942503	-0.436351	-1.03151	-0.990961	0.780148	-1.00045	-1.04333	-0.99054	0.883524	-0.938137	0.670644	-2.02491	0.973293	-0.484294	-1.99775	-0.989116	0.831068	-0.988343	-1.0644	-1.01732	0.942208	-1.0171
14	20	ER	0.281177	-0.962639	0.836438	-2.12806	-0.357501	-1.22841	0.108272	0.929664	0.991203	-1.15633	1.24527	1.85739	0.0265721	-1.21851	0.515037	-1.72786	-0.349232	-1.34197	0.159461	1.09376	1.13189	-1.40249	1.36334	1.94705	0.244156	-1.26221	0.306299	-1.34196	-0.369389	-1.2589	0.126261	1.08327	1.09377	-1.40273	1.28484	1.89292	0.41642	-1.24415	0.126418	-0.814967	-0.393672	-1.13988	0.101389	1.04042	1.03028	-1.33721	1.17028
14	21	nucleoplasm	0.452035	1.06114	-0.459887	0.62284	-0.566662	0.865839	-0.928904	-1.15674	-1.09101	0.997614	-1.03361	-1.16432	-1.79555	1.0265	-0.399394	0.537929	-0.644219	0.804553	-0.904093	-1.11423	-1.04587	0.947443	-0.981353	-0.893144	-1.84298	1.01157	-0.416444	0.448028	-0.666182	0.812511	-0.889074	-1.09515	-1.03338	0.950679	-1.00276	-0.808042	-1.81946	1.00976	-0.438066	0.217485	-0.682525	0.840788	-0.880529	-1.09029	-1.03716	0.971718	-1.04386
14	22	uniform cytoplasm	0.532303	0.0388606	-0.272233	0.511958	0.621608	0.177608	0.404022	0.0667602	0.0115972	0.0903625	-0.0755499	-0.340769	0.750051	0.106906	-0.265782	0.574183	0.562931	0.278125	0.309754	-0.00153173	-0.067403	0.206458	-0.190282	-0.589176	0.732296	0.127319	-0.252098	0.692483	0.538888	0.277565	0.279409	-0.021534	-0.0787052	0.221717	-0.188953	-0.685501	0.681461	0.131486	-0.254868	0.759214	0.471635	0.253699	0.24022	-0.0281325	-0.0755847	0.205299	-0.160204
14	23	vesicles	0.347382	0.270396	-0.174925	0.130349	-0.293868	0.194227	-0.265359	-0.211522	-0.205876	0.208539	-0.138397	0.130823	0.045881	0.239602	-0.194648	0.180285	-0.27904	0.190027	-0.261411	-0.190522	-0.189355	0.177712	-0.125861	0.107858	0.0788003	0.232967	-0.201673	0.250935	-0.217518	0.184075	-0.235683	-0.18753	-0.186005	0.171367	-0.120785	0.0784914	0.0787957	0.228898	-0.227739	0.309802	-0.201007	0.184103	-0.230375	-0.187908	-0.185932	0.168349	-0.119547
14	24	mitochondria	0.295698	-0.0127072	-0.0856199	0.47347	1.55438	0.19489	0.78773	0.137898	0.0470344	0.115813	-0.0882046	-0.390191	0.728853	-0.00887831	0.244243	0.191776	1.14125	-0.0653782	0.545419	0.150809	0.133795	-0.0545588	0.191185	0.2022	0.492572	-0.035996	0.677933	-0.124054	0.97699	-0.196576	0.461589	0.180638	0.197232	-0.147449	0.341213	0.584542	0.356241	-0.0791609	1.14664	-0.361836	0.877775	-0.297718	0.417387	0.219296	0.248273	-0.224099	0.459888
14	25	cytoskeleton	0.0694817	-0.159148	-0.363742	0.480069	-0.313205	0.281215	-0.0704259	0.148394	0.0259718	0.147876	-0.211339	-0.581603	0.719371	-0.0789924	-0.276576	0.394241	-0.311295	0.238683	-0.0998688	0.0874176	0.00606549	0.156519	-0.170346	-0.486536	0.601345	-0.0646889	-0.240644	0.341564	-0.325009	0.175025	-0.115702	0.0793586	0.0192312	0.100106	-0.0980264	-0.423749	0.524831	-0.065637	-0.226461	0.290038	-0.327289	0.12424	-0.118724	0.0818178	0.0343278	0.0523329	-0.0376001
14	26	nucleoplasm	0.309227	-0.427858	0.031129	-0.7181	-0.592937	-0.535326	-0.352318	0.320626	0.348131	-0.547107	0.503115	1.0461	-0.29586	-0.527797	-0.0879469	-0.638786	-0.651165	-0.50334	-0.394546	0.322584	0.341092	-0.609647	0.4784	1.09685	-0.250946	-0.51892	-0.172676	-0.474043	-0.648702	-0.425377	-0.397972	0.295949	0.299883	-0.56003	0.401859	1.03168	-0.152345	-0.524185	-0.269218	-0.232266	-0.634839	-0.338993	-0.390781	0.289112	0.279068	-0.507748	0.328453
14	27	nucleoli	0.335741	-0.260587	-0.1824	-0.401665	-0.729601	-0.244069	-0.495049	0.110364	0.121816	-0.302505	0.203315	0.502156	-0.148873	-0.286087	-0.216742	-0.346353	-0.740813	-0.203384	-0.487486	0.0835534	0.0907705	-0.301082	0.161533	0.532038	-0.151429	-0.276801	-0.280587	-0.241128	-0.724005	-0.147538	-0.474123	0.0662333	0.0632824	-0.264175	0.112974	0.530883	-0.112174	-0.248098	-0.371134	-0.140934	-0.715569	-0.0574109	-0.476099	0.0348967	0.0191719	-0.192989	0.0376019
14	28	structured cytoplasm	0.454133	-0.828963	0.837198	-1.16488	-0.132118	-1.10191	0.252662	0.825465	0.894016	-1.0059	1.07628	1.24747	0.136462	-0.979598	0.658465	-1.00349	-0.0695703	-1.17459	0.327329	0.927995	0.989563	-1.14115	1.14458	1.21839	0.299993	-1.00609	0.465262	-0.708096	-0.0985182	-1.10566	0.302186	0.927326	0.96638	-1.12504	1.0676	1.0953	0.438547	-1.00554	0.284572	-0.219117	-0.098084	-1.02452	0.305626	0.919118	0.937327	-1.08175	0.981623
14	29	nucleoplasm and cytoplasm	0.646177	0.417505	-0.259151	0.0323687	0.0127233	0.331665	-0.315095	-0.411902	-0.399806	0.358488	-0.325205	-0.072075	-0.208041	0.377966	-0.273919	0.0986831	0.0375502	0.33065	-0.316138	-0.399527	-0.394061	0.336817	-0.340221	-0.223039	-0.169777	0.373283	-0.327702	0.280791	0.0222343	0.357651	-0.323072	-0.403174	-0.402993	0.352747	-0.374032	-0.360265	-0.138493	0.379852	-0.396663	0.437703	-0.00433099	0.394838	-0.335567	-0.415157	-0.419706	0.378215	-0.41065
14	30	mitochondria	0.316665	0.739097	-0.396586	0.306232	-0.727885	0.626536	-0.75742	-0.743316	-0.71947	0.690204	-0.651063	-0.283768	-0.53299	0.710246	-0.332979	0.107051	-0.739121	0.561667	-0.734443	-0.710615	-0.676624	0.635234	-0.58836	-0.0654933	-0.584841	0.693907	-0.31935	-0.1166	-0.7096	0.540326	-0.707868	-0.692554	-0.657797	0.617123	-0.566817	0.109917	-0.632087	0.687192	-0.339591	-0.321055	-0.715262	0.543861	-0.704238	-0.68727	-0.656101	0.61898	-0.57203
14	31	cytoskeleton	0.307103	-0.131551	0.0730544	-0.0842332	0.255357	-0.248122	0.221076	0.147627	0.194955	-0.220081	0.271852	0.298685	0.318425	-0.0993206	-0.0160109	0.0601567	0.391968	-0.147918	0.25001	0.102927	0.126979	-0.151036	0.167888	0.0712547	0.360614	-0.0799105	-0.0510228	0.203996	0.346957	-0.0651508	0.214707	0.0761732	0.0825188	-0.0906664	0.0908013	-0.124902	0.390355	-0.0674088	-0.0964256	0.415899	0.358229	-0.00715939	0.203799	0.0600421	0.0546286	-0.048544	0.0385215
14	32	focal	0.445202	-0.268687	-0.129298	-0.271989	-0.559161	-0.226185	-0.283404	0.219545	0.216208	-0.279764	0.237597	0.386181	0.259991	-0.257993	-0.176484	-0.189804	-0.574559	-0.141515	-0.289329	0.197352	0.177722	-0.23144	0.167185	0.329488	0.295933	-0.241123	-0.236904	-0.110242	-0.588281	-0.0805491	-0.300382	0.176193	0.146113	-0.181777	0.111541	0.233491	0.320614	-0.230377	-0.291738	-0.0445968	-0.587462	-0.0379418	-0.299716	0.163553	0.128012	-0.148733	0.0778144
14	33	nucleoli	0.136157	0.806518	-0.453704	0.553348	-0.727831	0.749932	-0.788496	-0.851492	-0.834669	0.818132	-0.841536	-0.949061	-0.934057	0.793757	-0.401439	0.445552	-0.755502	0.681664	-0.773619	-0.832081	-0.800435	0.769251	-0.783373	-0.788312	-0.995685	0.786472	-0.423782	0.279704	-0.760675	0.663701	-0.764365	-0.823689	-0.788147	0.753229	-0.771292	-0.66654	-1.0471	0.783944	-0.471312	0.0973874	-0.761333	0.664265	-0.756038	-0.820059	-0.785446	0.753222	-0.776804
14	34	uniform cytoplasm	0.223952	-0.592959	-0.158857	0.410956	0.67464	-0.26525	0.932314	0.683157	0.584837	-0.448928	0.386921	-0.0686623	1.06968	-0.475192	-0.159829	0.454155	0.613514	-0.0921067	0.794549	0.582983	0.469617	-0.263484	0.230115	-0.259928	1.03531	-0.439533	-0.0993844	0.512636	0.564283	-0.0980189	0.728628	0.548381	0.449926	-0.239192	0.247898	-0.285036	0.972367	-0.434569	0.00655483	0.503166	0.536928	-0.167885	0.692718	0.543521	0.467755	-0.286719	0.329604
14	35	uniform cytoplasm	0.135408	-0.410074	0.181179	0.171652	0.698412	-0.445266	0.816269	0.517363	0.526078	-0.461226	0.499426	0.26977	0.597451	-0.345231	0.0673022	0.30569	0.853232	-0.279617	0.808414	0.472398	0.442149	-0.34702	0.362608	0.0277361	0.648179	-0.32483	0.090162	0.403646	0.86214	-0.229358	0.777317	0.455134	0.41214	-0.30171	0.324567	-0.118022	0.650539	-0.322498	0.118772	0.549506	0.840434	-0.243791	0.74681	0.450323	0.412788	-0.306299	0.340933
14	36	ER	0.143674	0.655752	-0.427175	0.592069	-0.248971	0.677279	-0.47038	-0.640762	-0.65829	0.706473	-0.712548	-0.933546	-0.134167	0.655847	-0.364651	0.557599	-0.323516	0.600273	-0.496097	-0.637822	-0.634296	0.652384	-0.634531	-0.752949	-0.242793	0.651529	-0.364339	0.564462	-0.340489	0.568699	-0.498581	-0.632733	-0.620249	0.625498	-0.601061	-0.620149	-0.323887	0.64604	-0.379679	0.525742	-0.347653	0.556962	-0.49799	-0.625884	-0.611491	0.614328	-0.586401
14	37	nucleoli	0.465497	1.03518	-0.464676	0.484704	-0.903931	0.86047	-1.02554	-1.1359	-1.0751	0.986906	-1.02725	-0.958759	-1.97923	1.00264	-0.40608	0.071618	-0.932959	0.806245	-0.986096	-1.09481	-1.03157	0.943271	-0.986533	-0.681383	-1.98387	0.989089	-0.426301	-0.672829	-0.933792	0.814736	-0.964631	-1.07782	-1.02123	0.944648	-1.00729	-0.578009	-1.95724	0.98842	-0.465114	-1.59303	-0.936963	0.842779	-0.952676	-1.07493	-1.02585	0.963372	-1.04709
14	38	mitochondria	0.415102	-0.345076	-0.162184	-0.764279	-0.6999	-0.220373	-0.455319	0.226052	0.207703	-0.335827	0.280489	0.983902	0.092371	-0.361131	-0.134615	-0.934034	-0.707227	-0.194063	-0.450282	0.216089	0.196017	-0.326161	0.276866	1.05394	0.131447	-0.344459	-0.0997013	-1.25442	-0.689214	-0.177418	-0.439732	0.198159	0.179637	-0.302989	0.27368	1.10213	0.147224	-0.361272	-0.0331211	-1.3643	-0.657966	-0.181821	-0.411343	0.214492	0.196515	-0.304352	0.296266
14	39	Golgi	0.186548	-0.490876	0.177581	-0.666853	-0.309766	-0.568136	0.0136221	0.529923	0.551198	-0.596084	0.647894	0.9878	0.448531	-0.541727	-0.0052288	-0.315917	-0.288674	-0.472131	0.0177771	0.547295	0.524624	-0.60405	0.579366	0.871798	0.567124	-0.527528	-0.100963	-0.0709443	-0.290962	-0.390128	0.00534344	0.521372	0.477872	-0.553335	0.503164	0.683881	0.645606	-0.509675	-0.206392	0.181179	-0.304721	-0.328733	-0.0119298	0.492496	0.441715	-0.508232	0.438899
14	40	nucleoli	0.100685	0.670617	-0.444701	0.0903104	-0.922134	0.644427	-0.998785	-0.916375	-0.867999	0.661924	-0.789357	-0.202972	-1.86603	0.668846	-0.382591	-0.313991	-0.932261	0.640842	-0.953606	-0.89805	-0.853907	0.689744	-0.78895	0.128583	-1.79961	0.701222	-0.38693	-1.10615	-0.930422	0.682127	-0.936763	-0.904952	-0.867691	0.742663	-0.834909	0.357584	-1.77563	0.717135	-0.394556	-1.99342	-0.92771	0.72664	-0.924211	-0.907427	-0.879088	0.789638	-0.884365
14	41	Golgi	0.162431	0.185012	-0.223025	0.0156047	-0.512229	0.141923	-0.388297	-0.148379	-0.142333	0.131575	-0.0853011	0.219744	0.116961	0.183543	-0.255259	0.126418	-0.534757	0.196075	-0.394735	-0.155611	-0.166384	0.155024	-0.134429	0.0997074	0.159192	0.190585	-0.285859	0.184897	-0.529137	0.218662	-0.391951	-0.165124	-0.178988	0.176195	-0.159168	-0.00644415	0.174136	0.193645	-0.328216	0.226197	-0.525214	0.227265	-0.389618	-0.170806	-0.183882	0.182708	-0.164445
14	42	nucleoplasm and cytoplasm	0.322668	-0.838005	0.495336	-0.0478208	1.06991	-0.897196	1.29908	0.970025	0.991457	-0.910987	0.96715	0.617074	0.917653	-0.770695	0.316931	0.126425	1.29098	-0.703678	1.30742	0.923679	0.895541	-0.789345	0.81765	0.404858	0.982291	-0.747979	0.316655	0.314888	1.34724	-0.638236	1.29189	0.905921	0.858859	-0.739802	0.771688	0.2355	1.00799	-0.741235	0.330784	0.500021	1.34452	-0.639072	1.262	0.897406	0.850773	-0.737482	0.77599
14	43	mitochondria	0.342667	0.278861	-0.259317	0.244223	-0.39705	0.242225	-0.346453	-0.245853	-0.250565	0.239896	-0.206009	-0.0604197	-0.166214	0.24888	-0.21448	0.189072	-0.406438	0.208104	-0.351017	-0.214836	-0.216885	0.196288	-0.163929	0.0196564	-0.174477	0.232901	-0.184298	0.104999	-0.413784	0.169425	-0.356525	-0.204025	-0.202144	0.165641	-0.124087	0.132562	-0.219999	0.2133	-0.173761	0.0181477	-0.440638	0.140433	-0.371331	-0.193479	-0.189239	0.137644	-0.0937131
14	44	nucleoplasm and cytoplasm	0.357883	0.607238	-0.347071	0.541002	0.175702	0.533132	-0.241298	-0.56532	-0.554444	0.567172	-0.525795	-0.517222	-0.138611	0.619755	-0.338574	0.624331	0.223776	0.57159	-0.237943	-0.578042	-0.578488	0.610053	-0.590813	-0.858169	-0.0941978	0.622896	-0.392214	0.807485	0.182495	0.603498	-0.253794	-0.5832	-0.590734	0.641073	-0.638358	-1.13269	-0.084083	0.624646	-0.474102	0.927558	0.163026	0.618671	-0.260865	-0.584948	-0.595427	0.650838	-0.658898
14	45	nucleoli and cytoplasm	0.37069	0.138881	-0.401545	0.454109	-0.558544	0.401703	-0.386674	-0.155806	-0.224189	0.322656	-0.368493	-0.581691	0.430586	0.211681	-0.378533	0.465229	-0.593665	0.461865	-0.414879	-0.226605	-0.288958	0.42286	-0.452573	-0.781283	0.378561	0.232009	-0.418623	0.475435	-0.607935	0.466225	-0.425587	-0.247162	-0.303045	0.43395	-0.460067	-0.908384	0.332068	0.241568	-0.477009	0.450371	-0.607199	0.457092	-0.426053	-0.256122	-0.305039	0.421191	-0.446597
14	47	structured cytoplasm	0.314408	-0.767028	0.170703	-0.70902	-0.420823	-0.724644	-0.0438887	0.686438	0.692675	-0.805899	0.741741	0.999453	0.384015	-0.774882	0.0383945	-0.497947	-0.412184	-0.621214	-0.0374556	0.673424	0.649407	-0.765195	0.658165	0.912816	0.472887	-0.754829	-0.0543689	-0.31081	-0.415566	-0.535495	-0.0478089	0.647222	0.603712	-0.701761	0.576447	0.749916	0.556155	-0.737431	-0.14188	-0.101611	-0.412058	-0.467	-0.0543271	0.624783	0.571593	-0.647526	0.513283
14	48	ER	0.0985844	0.314203	-0.316932	0.326323	-0.405315	0.343941	-0.35573	-0.27664	-0.297637	0.320859	-0.290436	-0.183973	0.178737	0.317976	-0.259485	0.217671	-0.45601	0.310194	-0.38671	-0.279811	-0.288455	0.300807	-0.258942	-0.0724015	0.11676	0.309103	-0.210143	0.0708219	-0.448861	0.262458	-0.383156	-0.271499	-0.26931	0.266239	-0.2067	0.0943978	0.0413195	0.295541	-0.139922	-0.0897165	-0.433607	0.222803	-0.37312	-0.258417	-0.250457	0.2354	-0.158155
15	1	nucleoplasm	0.266125	0.517665	-0.277413	0.0894709	-0.516724	0.371885	-0.630633	-0.58925	-0.553678	0.445875	-0.460038	-0.368407	-0.802535	0.451486	-0.287669	0.0613592	-0.537116	0.322345	-0.629	-0.56888	-0.525905	0.385756	-0.438997	-0.398016	-0.828563	0.428775	-0.323722	0.12985	-0.53528	0.323338	-0.618109	-0.559293	-0.518394	0.381431	-0.454606	-0.380321	-0.822249	0.424022	-0.382663	0.203922	-0.541359	0.357358	-0.616155	-0.560521	-0.52586	0.401831	-0.489595
15	2	structured cytoplasm	0.199915	0.253402	-0.301519	0.608294	2.3745	0.549079	0.792324	-0.197641	-0.292302	0.512314	-0.536439	-0.99366	0.466977	0.303781	-0.172156	0.563303	1.87363	0.439462	0.557476	-0.240859	-0.292082	0.448127	-0.405557	-0.75791	0.307069	0.305067	-0.0233623	0.584576	1.67731	0.361562	0.47787	-0.232213	-0.258538	0.382755	-0.309348	-0.57084	0.222201	0.304155	0.188225	0.546157	1.55793	0.312226	0.430745	-0.227362	-0.240697	0.347801	-0.249819
15	3	nucleoli and cytoplasm	0.222439	0.150401	-0.339299	0.520168	0.0167222	0.348831	0.00964377	-0.107086	-0.178121	0.278454	-0.309441	-0.637394	0.374347	0.185735	-0.28922	0.50798	-0.0630773	0.328183	-0.0634028	-0.130268	-0.183033	0.28922	-0.292242	-0.598427	0.302123	0.193859	-0.269509	0.536984	-0.0921622	0.277424	-0.0883189	-0.137394	-0.17169	0.251697	-0.237202	-0.506657	0.225735	0.191953	-0.243987	0.508593	-0.106081	0.228921	-0.099908	-0.135328	-0.156279	0.213239	-0.182824
15	4	cytoskeleton	0.423438	0.134087	0.288206	-0.288606	-0.11508	-0.0631199	-0.14248	-0.106389	-0.0525159	0.0279213	0.0611352	0.339011	-0.18819	0.0812591	0.222028	-0.097584	-0.0152806	-0.0977686	-0.0399186	-0.0530319	-0.00566869	-0.025583	0.0935217	0.263264	-0.102753	0.0767686	0.0754126	0.0925373	-0.0388454	-0.0578449	-0.05833	-0.0597127	-0.0265307	-0.00894122	0.0457696	0.156954	-0.0585158	0.0756971	0.205206	0.330771	0.104752	-0.0719724	0.0621015	-0.036988	-0.00223692	-0.0061308	0.0553261
15	5	cytoskeleton	0.495103	0.543162	-0.266962	0.295239	0.00247032	0.485344	-0.305544	-0.530328	-0.525775	0.528732	-0.506923	-0.491425	-0.417703	0.488763	-0.259289	0.381681	-0.0289681	0.421199	-0.317391	-0.501606	-0.490824	0.462392	-0.455646	-0.556325	-0.434115	0.467963	-0.270763	0.503346	-0.0211808	0.407035	-0.31285	-0.495088	-0.482343	0.440515	-0.44856	-0.614169	-0.438252	0.46709	-0.314647	0.616788	-0.0353921	0.420947	-0.320796	-0.503718	-0.491497	0.444583	-0.46731
15	6	nucleoplasm	0.241733	0.598249	-0.391253	0.594808	0.34833	0.600758	-0.149709	-0.568486	-0.577414	0.617029	-0.612882	-0.744915	-0.139186	0.614966	-0.324266	0.596049	0.265239	0.596802	-0.200881	-0.586565	-0.589989	0.639841	-0.624755	-0.837386	-0.182895	0.613333	-0.270747	0.628635	0.290484	0.574896	-0.189383	-0.579821	-0.577229	0.622505	-0.597695	-0.804015	-0.23363	0.610743	-0.167449	0.577064	0.328807	0.556644	-0.177649	-0.572798	-0.566888	0.606178	-0.569385
15	7	structured cytoplasm	0.40337	0.0795823	-0.246825	0.523891	1.13892	0.263196	0.592217	0.0548017	-0.0263056	0.17151	-0.152859	-0.477973	0.858389	0.132227	-0.206337	0.557276	1.05907	0.31456	0.481704	0.00772738	-0.074346	0.256242	-0.214036	-0.654728	0.831516	0.144642	-0.142503	0.64344	1.00934	0.292253	0.436622	-0.00427941	-0.0719208	0.246937	-0.183066	-0.679717	0.764375	0.136415	-0.127074	0.739657	0.955338	0.246246	0.403279	0.00451004	-0.0501339	0.208845	-0.125938
15	8	ER	0.138928	0.529801	-0.335251	0.379662	-0.322544	0.474049	-0.4003	-0.488485	-0.487148	0.496683	-0.447412	-0.259433	-0.0910196	0.52129	-0.298724	0.370955	-0.326869	0.460603	-0.401853	-0.474204	-0.472314	0.487809	-0.440022	-0.277244	-0.0773765	0.515958	-0.28279	0.342249	-0.316468	0.438693	-0.395758	-0.467938	-0.462203	0.474383	-0.418921	-0.189784	-0.132157	0.508034	-0.269146	0.283445	-0.313092	0.420063	-0.392643	-0.459305	-0.450826	0.459876	-0.396643
15	9	plasma membrane	0.116589	0.288378	-0.391933	0.526513	-0.220079	0.460193	-0.241117	-0.239459	-0.303006	0.399273	-0.409444	-0.659159	0.508784	0.322737	-0.347316	0.569096	-0.157072	0.456568	-0.213433	-0.259854	-0.311447	0.434012	-0.421541	-0.746325	0.473506	0.331179	-0.360321	0.639012	-0.201827	0.449413	-0.238538	-0.270652	-0.313493	0.433881	-0.414175	-0.80075	0.414471	0.336084	-0.38869	0.657181	-0.211784	0.43281	-0.246273	-0.275644	-0.31038	0.417867	-0.389751
15	10	nucleoplasm	0.338033	0.719061	-0.424396	0.632984	0.150145	0.723819	-0.356679	-0.694844	-0.708185	0.766599	-0.774979	-1.09528	-0.0951361	0.721988	-0.359096	0.623778	-0.0274079	0.648572	-0.417603	-0.701582	-0.693025	0.717077	-0.697964	-0.946525	-0.228809	0.717711	-0.336936	0.653892	-0.0858512	0.619069	-0.43267	-0.695606	-0.6781	0.690859	-0.662804	-0.812301	-0.317809	0.715291	-0.339912	0.635332	-0.129351	0.613292	-0.444112	-0.691823	-0.672629	0.687105	-0.655618
15	11	ER	0.193479	-0.55999	0.368395	-0.876134	-0.233977	-0.693633	0.0741067	0.554416	0.587005	-0.672479	0.713997	0.909062	0.268798	-0.647843	0.190956	-0.750712	-0.261014	-0.690563	0.0611795	0.596532	0.611515	-0.735495	0.713536	0.866784	0.367114	-0.664856	0.113258	-0.542083	-0.26016	-0.656715	0.0627806	0.598588	0.603022	-0.725897	0.678189	0.777071	0.45725	-0.668149	0.0380939	-0.228738	-0.255878	-0.615048	0.0660199	0.595828	0.591844	-0.703136	0.640442
15	12	nucleoplasm and cytoplasm	0.173833	0.351596	-0.346807	0.600191	0.739171	0.449288	0.192464	-0.288119	-0.331341	0.414172	-0.426698	-0.755742	0.25204	0.38855	-0.314463	0.655311	0.677379	0.486327	0.121207	-0.323045	-0.368608	0.480396	-0.480643	-0.981023	0.222528	0.397903	-0.320097	0.796545	0.605108	0.485549	0.0821567	-0.331869	-0.371328	0.487776	-0.481424	-1.09068	0.182762	0.399412	-0.337329	0.875844	0.583889	0.472586	0.0686049	-0.332265	-0.36534	0.474717	-0.463544
15	13	ERGIC	1	0.922527	-0.417365	0.545648	-0.402286	0.742825	-0.721255	-0.954672	-0.903227	0.846754	-0.82437	-0.589707	-0.970845	0.903757	-0.407995	0.654899	-0.400535	0.727914	-0.695899	-0.935067	-0.888713	0.834414	-0.835141	-0.908845	-0.914566	0.895565	-0.464514	0.830966	-0.345765	0.741058	-0.668146	-0.925296	-0.884507	0.844628	-0.864021	-1.10218	-0.894573	0.897111	-0.55444	0.928617	-0.356462	0.766776	-0.663799	-0.926298	-0.891349	0.864094	-0.900675
15	14	ER	0.268527	0.560252	-0.405155	0.623795	0.70515	0.648703	0.0174824	-0.514706	-0.554425	0.654685	-0.680406	-1.01855	-0.00205824	0.584168	-0.348129	0.638614	0.499095	0.594156	-0.0826722	-0.542362	-0.56052	0.632188	-0.628836	-0.996935	-0.0983908	0.585411	-0.328742	0.710658	0.433684	0.557026	-0.110203	-0.541145	-0.545927	0.599	-0.585687	-0.937511	-0.167459	0.585294	-0.32987	0.730689	0.381371	0.537347	-0.130268	-0.539668	-0.538637	0.582709	-0.56176
15	15	ER	0.357799	0.833533	-0.447441	0.626713	-0.263353	0.763924	-0.617898	-0.858156	-0.84115	0.837071	-0.853047	-1.09179	-0.715321	0.821871	-0.395655	0.624827	-0.355488	0.697365	-0.630354	-0.843942	-0.812883	0.78867	-0.792715	-0.997984	-0.793156	0.815213	-0.42395	0.694166	-0.388736	0.68665	-0.630884	-0.836564	-0.804029	0.777968	-0.787824	-0.985148	-0.83313	0.813865	-0.47386	0.70196	-0.401049	0.695679	-0.627982	-0.833477	-0.803833	0.784102	-0.801637
15	16	structured cytoplasm	0.501003	-0.162768	-0.150264	0.0603543	-0.187805	-0.18975	-0.0856163	0.110669	0.131924	-0.19313	0.138175	0.110159	0.15427	-0.129577	-0.170035	0.155098	-0.100619	-0.100553	-0.0618219	0.0765799	0.0800494	-0.126597	0.0623183	-0.0029155	0.188724	-0.109067	-0.202556	0.26606	-0.129883	-0.0335273	-0.0866927	0.0529482	0.0447698	-0.0725468	0.00509515	-0.0858949	0.18847	-0.105049	-0.21174	0.331359	-0.131965	-0.00170241	-0.0892055	0.0504438	0.0365851	-0.0481536	-0.0137749
15	17	nucleoli	0.141672	1.01102	-0.453178	0.420286	-0.902873	0.838639	-1.01252	-1.09762	-1.04085	0.961583	-0.983853	-0.694143	-1.6852	0.97708	-0.372121	-0.181103	-0.928932	0.775016	-0.973658	-1.05491	-0.993	0.910534	-0.928119	-0.22047	-1.7369	0.960861	-0.359534	-1.19834	-0.932504	0.778999	-0.954291	-1.03551	-0.979852	0.909164	-0.941194	0.0617191	-1.74934	0.955454	-0.349807	-2.3639	-0.934434	0.801102	-0.941938	-1.02692	-0.979141	0.922429	-0.968525
15	18	nucleoli	0.370556	0.00120002	-0.366796	-0.23556	-0.852998	0.151015	-0.736549	-0.188396	-0.200494	0.0274606	-0.150806	0.474621	-0.363652	0.053654	-0.363309	-0.171942	-0.863625	0.238622	-0.730387	-0.259567	-0.278407	0.114615	-0.2457	0.389314	-0.351931	0.101656	-0.43574	-0.0740542	-0.862188	0.322053	-0.729447	-0.306371	-0.333956	0.201485	-0.334488	0.265995	-0.322432	0.15087	-0.538106	-0.00726617	-0.860088	0.398435	-0.72919	-0.345774	-0.38042	0.285616	-0.414176
15	19	nucleoli	0.290844	1.05346	-0.465898	0.442937	-0.949587	0.863524	-1.07472	-1.16663	-1.09973	0.989347	-1.03157	-0.560443	-2.19275	1.03288	-0.40647	-0.00779635	-0.971951	0.81727	-1.02855	-1.13569	-1.0659	0.96107	-1.00734	-0.413737	-2.17498	1.01946	-0.427477	-0.860343	-0.971486	0.830095	-1.00551	-1.11902	-1.05718	0.967983	-1.03674	-0.308777	-2.1397	1.01698	-0.461696	-1.96818	-0.972391	0.86125	-0.991424	-1.11378	-1.06105	0.989681	-1.0812
15	20	ER	0.41026	0.565431	-0.322917	0.477427	-0.133225	0.50143	-0.341375	-0.528868	-0.523552	0.534146	-0.495561	-0.483994	-0.164896	0.563342	-0.318403	0.552247	-0.159188	0.512292	-0.355446	-0.524522	-0.524716	0.547778	-0.523283	-0.686567	-0.133603	0.562333	-0.35402	0.694089	-0.152943	0.518229	-0.353112	-0.523582	-0.525777	0.552823	-0.535589	-0.80128	-0.147974	0.560213	-0.41147	0.77787	-0.153355	0.522174	-0.352902	-0.521516	-0.523984	0.553742	-0.541293
15	21	nucleoplasm	0.360236	1.01448	-0.450104	0.629103	-0.320752	0.849798	-0.80995	-1.09332	-1.03899	0.971419	-1.00125	-1.21755	-1.46119	0.984943	-0.384531	0.577811	-0.424369	0.787423	-0.800865	-1.0572	-0.99805	0.921742	-0.946657	-1.05027	-1.5148	0.971393	-0.386981	0.547004	-0.458824	0.7908	-0.791914	-1.03952	-0.985218	0.920753	-0.960117	-1.00608	-1.51198	0.970986	-0.412418	0.472101	-0.48411	0.815888	-0.7878	-1.03658	-0.989367	0.939306	-0.996206
15	22	uniform cytoplasm	0.597586	0.146202	-0.309641	0.494954	0.254623	0.27773	0.151162	-0.0605852	-0.114388	0.205663	-0.197074	-0.412308	0.55101	0.195829	-0.288523	0.542006	0.216721	0.338652	0.0873327	-0.10688	-0.165163	0.288408	-0.271336	-0.593353	0.531844	0.210668	-0.282371	0.623869	0.195565	0.322195	0.0658859	-0.12044	-0.166173	0.284648	-0.253144	-0.631201	0.476281	0.211672	-0.268545	0.639057	0.181112	0.290479	0.0514963	-0.121661	-0.156977	0.259926	-0.213502
15	23	vesicles	0.471543	0.676848	-0.416693	0.5637	-0.269546	0.646053	-0.481735	-0.660994	-0.661797	0.679308	-0.670805	-0.781485	-0.221347	0.677309	-0.366778	0.555226	-0.30299	0.61303	-0.489111	-0.659791	-0.65253	0.667166	-0.652187	-0.800117	-0.270302	0.674791	-0.392352	0.610946	-0.33025	0.598201	-0.49533	-0.657693	-0.645871	0.656091	-0.641282	-0.774708	-0.327303	0.672803	-0.42373	0.616469	-0.319569	0.591375	-0.487929	-0.653964	-0.640815	0.650018	-0.633842
15	24	mitochondria	0.38094	0.718164	-0.281683	0.587291	1.59574	0.686822	0.0580478	-0.723585	-0.716977	0.763155	-0.742398	-0.938745	-0.482335	0.710314	-0.0916299	0.484416	1.19274	0.583176	-0.0691053	-0.705071	-0.677115	0.689469	-0.628059	-0.613643	-0.608265	0.693363	0.0852702	0.438115	1.03003	0.553238	-0.110599	-0.678638	-0.644958	0.661424	-0.590315	-0.483447	-0.632668	0.689217	0.332112	0.330285	0.923209	0.550014	-0.137632	-0.670785	-0.639477	0.659736	-0.584295
15	25	cytoskeleton	0.355866	0.698282	-0.410166	0.560216	-0.256585	0.689081	-0.481085	-0.681751	-0.687415	0.725745	-0.724459	-0.906089	-0.158785	0.701569	-0.355428	0.536086	-0.314779	0.632608	-0.495129	-0.684297	-0.671587	0.694673	-0.673398	-0.779233	-0.255529	0.696813	-0.332917	0.49474	-0.307484	0.612941	-0.485254	-0.677309	-0.660191	0.677394	-0.651173	-0.713085	-0.314348	0.694673	-0.369218	0.497269	-0.346786	0.615025	-0.496425	-0.675132	-0.658961	0.676811	-0.653154
15	26	nucleoplasm	0.580436	0.340183	-0.288892	0.01987	-0.646247	0.264977	-0.596071	-0.345141	-0.343283	0.2746	-0.245366	0.231984	-0.244691	0.280136	-0.310539	0.135195	-0.67106	0.262762	-0.59916	-0.327697	-0.329735	0.226173	-0.244996	0.1861	-0.212448	0.281086	-0.364745	0.239768	-0.653913	0.283979	-0.588744	-0.340139	-0.344481	0.237599	-0.272776	0.148168	-0.205816	0.284376	-0.447935	0.328876	-0.652361	0.308396	-0.586901	-0.353621	-0.358778	0.250487	-0.297398
15	27	nucleoli	0.222067	0.238787	-0.396918	0.0214039	-0.721394	0.335083	-0.777796	-0.43769	-0.434074	0.24493	-0.354945	0.290469	-0.734191	0.303671	-0.384988	0.12433	-0.732597	0.394731	-0.768585	-0.516638	-0.512263	0.317524	-0.436379	0.183832	-0.74859	0.365199	-0.440465	0.252173	-0.700993	0.462246	-0.75109	-0.567274	-0.566357	0.394846	-0.513166	0.128781	-0.738848	0.447463	-0.531757	0.371902	-0.705887	0.547936	-0.752282	-0.616054	-0.620704	0.502229	-0.60353
15	28	structured cytoplasm	0.487433	0.0711881	-0.126101	-0.0690614	0.0255407	-0.00287596	-0.0674101	-0.0682873	-0.0485877	0.0157745	0.00264072	0.120384	0.110836	0.0566348	-0.0243437	0.0629618	0.164926	-0.0362151	0.0450345	-0.0276272	-0.00744169	0.0095672	0.0157166	-0.085759	0.194165	0.0572883	-0.0958703	0.241827	0.168196	-0.00583924	0.041096	-0.0321399	-0.0203492	0.0318482	-0.0246178	-0.243524	0.22634	0.0607932	-0.175101	0.403192	0.133971	0.029587	0.0174797	-0.0414126	-0.0368535	0.0521356	-0.0596071
15	29	nucleoplasm and cytoplasm	0.397587	-1.3129	2.35574	-2.64455	0.195664	-1.7748	0.70427	1.3273	1.44582	-1.57195	1.77646	1.93235	0.0815598	-1.57949	2.35067	-2.67607	0.355451	-2.04512	0.946905	1.54532	1.69272	-1.84956	1.99848	1.99751	0.316884	-1.69986	2.30822	-2.28572	0.435772	-2.16545	1.08308	1.66396	1.81133	-1.96341	2.08143	1.96499	0.560988	-1.72131	2.06574	-1.53545	0.454832	-2.13722	1.11876	1.67499	1.80483	-1.95879	2.02158
15	30	mitochondria	0.28598	0.578436	-0.340034	0.390009	-0.44279	0.518744	-0.50507	-0.54715	-0.544145	0.554612	-0.510064	-0.408785	-0.132	0.558944	-0.252164	0.281408	-0.43976	0.453743	-0.493765	-0.522172	-0.504434	0.503851	-0.444514	-0.260109	-0.183758	0.546675	-0.205402	0.185629	-0.420347	0.421848	-0.480263	-0.509591	-0.487702	0.478941	-0.409728	-0.133256	-0.245715	0.535594	-0.171502	0.0964222	-0.418488	0.406983	-0.475576	-0.499257	-0.476999	0.465856	-0.391086
15	31	cytoskeleton	0.299385	-0.119095	-0.0314124	-0.261614	-0.0743399	-0.191266	-0.0173068	0.122959	0.142599	-0.190236	0.215813	0.470763	0.110339	-0.145924	-0.117373	-0.0683141	-0.037541	-0.12585	-0.0156591	0.127681	0.124202	-0.182882	0.164133	0.341789	0.182046	-0.137382	-0.169836	0.14897	-0.0331247	-0.0607918	-0.0220802	0.112186	0.0935761	-0.138977	0.104464	0.187009	0.233781	-0.127768	-0.213143	0.34858	-0.0120218	-0.0175163	-0.00939837	0.102896	0.0774166	-0.10787	0.0644644
15	32	focal	0.170307	-0.848165	0.390494	-1.11395	-0.446508	-0.880324	0.0489652	0.771174	0.806541	-0.920626	0.878051	1.05157	0.308395	-0.856072	0.278254	-1.08354	-0.439916	-0.807429	0.0782148	0.766355	0.784347	-0.897877	0.833999	1.0642	0.370769	-0.870745	0.384413	-1.15175	-0.327958	-0.840755	0.182703	0.805187	0.825914	-0.917038	0.887134	1.09331	0.441941	-0.882796	0.544764	-1.11927	-0.232243	-0.874323	0.263041	0.83194	0.858693	-0.935923	0.933587
15	33	nucleoli	0.174943	0.916537	-0.465758	0.611075	-0.710041	0.804791	-0.843164	-0.960567	-0.929413	0.895957	-0.915874	-1.10684	-0.957615	0.895106	-0.417154	0.560673	-0.73418	0.732576	-0.818999	-0.934757	-0.892289	0.837919	-0.847895	-0.914958	-1.03749	0.885694	-0.453779	0.516241	-0.738132	0.720766	-0.805616	-0.924147	-0.881023	0.826552	-0.842919	-0.792923	-1.0923	0.884535	-0.508233	0.358526	-0.738067	0.731208	-0.796532	-0.921362	-0.881583	0.836539	-0.861275
15	34	uniform cytoplasm	0.521132	0.910756	-0.439631	0.576033	-0.48893	0.789695	-0.752361	-0.948909	-0.914804	0.882329	-0.892007	-0.974963	-0.912632	0.893549	-0.40471	0.602116	-0.513631	0.748265	-0.733593	-0.929799	-0.890684	0.855751	-0.867512	-1.0366	-0.938767	0.884579	-0.432387	0.611273	-0.530167	0.751237	-0.726175	-0.919869	-0.883181	0.855762	-0.879834	-1.07775	-0.959046	0.884643	-0.501662	0.614178	-0.536525	0.768543	-0.720181	-0.918336	-0.885744	0.867019	-0.903399
15	35	uniform cytoplasm	0.146786	-0.293802	-0.218594	0.121165	-0.269201	-0.123944	-0.0157409	0.275853	0.238776	-0.239175	0.175194	0.139739	0.531324	-0.220021	-0.248962	0.241093	-0.266508	0.0309874	-0.0403578	0.209044	0.14523	-0.0989399	0.0354922	-0.0666501	0.552497	-0.192418	-0.284386	0.358287	-0.270381	0.0803526	-0.0488706	0.184478	0.11402	-0.0444298	-0.0115498	-0.223297	0.550948	-0.177061	-0.344394	0.462159	-0.27432	0.0964561	-0.0594129	0.168558	0.100551	-0.0268354	-0.0280138
15	36	ER	0.184591	-0.24177	-0.259162	0.470887	0.24897	0.118329	0.394633	0.317636	0.191305	-0.0142155	-0.0287472	-0.447196	0.943137	-0.200616	-0.10689	0.339375	0.1849	-0.0354762	0.297672	0.303093	0.23465	-0.114473	0.136771	-0.108831	0.778156	-0.202997	0.0827113	0.187503	0.137216	-0.173017	0.253321	0.305181	0.273831	-0.212285	0.28429	0.193987	0.641246	-0.223692	0.363427	0.00954366	0.143732	-0.292024	0.245123	0.324224	0.316523	-0.297054	0.414924
15	37	nucleoli	0.459605	0.882145	-0.457531	0.468619	-0.800244	0.78275	-0.938582	-0.969554	-0.933833	0.853093	-0.888561	-0.362534	-1.45635	0.936553	-0.395534	0.257511	-0.843482	0.769165	-0.916435	-1.0037	-0.951645	0.893437	-0.917407	-0.762809	-1.46637	0.921489	-0.403992	-0.216661	-0.848634	0.770273	-0.898409	-0.985958	-0.938372	0.888904	-0.926637	-0.734145	-1.44972	0.920792	-0.425797	-0.826152	-0.854818	0.793026	-0.888771	-0.983578	-0.942073	0.903521	-0.957345
15	38	mitochondria	0.219718	0.641354	-0.406884	0.233308	-0.838007	0.572615	-0.809216	-0.646448	-0.638954	0.611726	-0.584806	-0.149885	-0.440133	0.609479	-0.361855	0.0389235	-0.858764	0.516762	-0.79188	-0.618611	-0.601872	0.557052	-0.52822	0.128603	-0.524811	0.588774	-0.385133	-0.1885	-0.846183	0.492331	-0.77269	-0.600482	-0.582526	0.52973	-0.499951	0.342115	-0.576238	0.573552	-0.43265	-0.413815	-0.840365	0.484254	-0.762181	-0.588911	-0.572732	0.513967	-0.484315
15	39	Golgi	0.366498	-1.10503	0.762259	-1.49873	-0.210286	-1.3462	0.248223	1.07761	1.13474	-1.28698	1.33169	1.7287	0.230999	-1.29609	0.467595	-1.25689	-0.227329	-1.38857	0.2707	1.1831	1.21933	-1.44502	1.37689	1.77511	0.414946	-1.30868	0.317868	-0.943909	-0.234995	-1.29467	0.250483	1.16695	1.17696	-1.41065	1.28589	1.68076	0.576522	-1.30225	0.128516	-0.416835	-0.260915	-1.17741	0.223428	1.13954	1.12458	-1.34782	1.17657
15	40	nucleoli	0.132293	0.309256	-0.431163	-0.360143	-0.941474	0.446515	-0.966127	-0.626962	-0.607495	0.340891	-0.516851	0.505181	-1.54637	0.409299	-0.380632	-0.780697	-0.956876	0.503181	-0.939291	-0.689901	-0.669532	0.451729	-0.583978	0.779254	-1.52998	0.480881	-0.396099	-1.54477	-0.953617	0.574274	-0.926482	-0.728773	-0.715588	0.553367	-0.667094	0.933565	-1.49336	0.504445	-0.414531	-2.33172	-0.949065	0.622914	-0.912262	-0.734051	-0.730174	0.610613	-0.722955
15	41	Golgi	0.544297	-0.868442	0.575379	-0.965743	-0.0572535	-1.03588	0.37618	0.9329	0.957935	-1.01814	1.09489	1.31457	0.510532	-1.00743	0.320333	-0.732665	-0.0527568	-1.03404	0.361741	1.0065	1.00482	-1.13321	1.1112	1.30002	0.64268	-1.02483	0.21432	-0.487933	-0.062234	-0.980417	0.333737	0.991964	0.974724	-1.11937	1.05743	1.19675	0.740956	-1.02623	0.119067	-0.171711	-0.0711138	-0.926242	0.310905	0.969715	0.945074	-1.09459	1.00582
15	42	nucleoplasm and cytoplasm	0.251743	0.569613	-0.341716	0.542398	0.253334	0.523558	-0.164019	-0.513686	-0.51571	0.545519	-0.50388	-0.528909	0.0314381	0.579001	-0.309098	0.583401	0.215456	0.529684	-0.197635	-0.521825	-0.526799	0.563543	-0.525685	-0.693815	0.031261	0.576705	-0.297526	0.674934	0.198441	0.514392	-0.207098	-0.518423	-0.518797	0.553041	-0.510035	-0.704936	-0.012938	0.57115	-0.290866	0.707407	0.164674	0.496362	-0.220751	-0.511982	-0.509204	0.538166	-0.487467
15	43	mitochondria	0.269401	0.172608	-0.228626	0.173859	-0.370762	0.172531	-0.281145	-0.130286	-0.144448	0.15237	-0.112461	0.0347566	0.203904	0.157325	-0.18953	0.086261	-0.403238	0.149924	-0.306183	-0.117772	-0.127614	0.12351	-0.0843575	0.125492	0.169623	0.141104	-0.139447	-0.0612211	-0.395446	0.100571	-0.30384	-0.105333	-0.10734	0.0842868	-0.0289535	0.278291	0.105888	0.121127	-0.0870697	-0.21167	-0.405484	0.0533939	-0.310788	-0.0925909	-0.0888946	0.0443067	0.0240176
15	44	nucleoplasm and cytoplasm	0.20776	0.115307	-0.121174	0.21267	0.321566	0.104852	0.0878374	-0.0396957	-0.0589907	0.0935348	-0.0535112	-0.135368	0.385455	0.0983411	-0.162566	0.309948	0.32387	0.129815	0.0583704	-0.0420065	-0.0687669	0.110078	-0.0948539	-0.360291	0.435935	0.100609	-0.218124	0.505378	0.3021	0.148632	0.0381837	-0.0520644	-0.0817859	0.122124	-0.118591	-0.517493	0.444152	0.102494	-0.2905	0.678116	0.274476	0.163781	0.0199095	-0.0577473	-0.0886174	0.126638	-0.130268
15	45	nucleoli and cytoplasm	0.306601	0.453749	-0.384741	0.567107	0.0664741	0.544081	-0.171154	-0.411595	-0.449688	0.525453	-0.537693	-0.806655	0.133547	0.4808	-0.328382	0.568599	0.0146602	0.535125	-0.211237	-0.436821	-0.465484	0.547551	-0.541458	-0.881794	0.0766386	0.486016	-0.336811	0.667822	-0.0201964	0.510897	-0.22906	-0.441237	-0.45914	0.529099	-0.514716	-0.884339	0.0171601	0.486822	-0.366202	0.715873	-0.0477788	0.488948	-0.240861	-0.44139	-0.452882	0.509545	-0.489173
15	47	structured cytoplasm	0.257868	-0.461318	-0.0758437	0.409693	1.0606	-0.260615	0.989671	0.609054	0.53102	-0.402434	0.407479	-0.0248903	1.09413	-0.375041	-0.0833069	0.466849	1.05875	-0.110545	0.878813	0.536191	0.443141	-0.256365	0.271145	-0.222585	1.08237	-0.344975	0.00190679	0.539036	1.00062	-0.108265	0.811062	0.505015	0.424207	-0.231097	0.281085	-0.267836	1.02613	-0.344849	0.116087	0.581407	0.964935	-0.164198	0.775863	0.50336	0.441489	-0.266939	0.348993
15	48	ER	0.197986	0.609458	-0.371574	0.215161	-0.606193	0.526794	-0.675262	-0.60948	-0.597965	0.561178	-0.528849	-0.0851663	-0.439373	0.581506	-0.347035	0.26119	-0.612259	0.505893	-0.660367	-0.58965	-0.578994	0.530726	-0.511875	-0.0701363	-0.426826	0.582056	-0.385223	0.300782	-0.609681	0.51029	-0.650112	-0.591798	-0.580221	0.532884	-0.520247	-0.052013	-0.442931	0.591917	-0.448264	0.29849	-0.617817	0.528019	-0.650736	-0.600964	-0.590676	0.54977	-0.540603
16	1	nucleoplasm	0.180476	0.825307	-0.416911	0.557834	-0.361036	0.696898	-0.631941	-0.840908	-0.807121	0.772323	-0.754619	-0.667395	-0.721464	0.813501	-0.380342	0.597545	-0.357779	0.684724	-0.613264	-0.827383	-0.795772	0.769953	-0.763862	-0.860473	-0.710652	0.80641	-0.396693	0.667299	-0.341028	0.693193	-0.598931	-0.818759	-0.791035	0.778565	-0.783116	-0.977762	-0.718405	0.805322	-0.430452	0.654925	-0.358673	0.708495	-0.599449	-0.816534	-0.792663	0.790372	-0.803546
16	2	structured cytoplasm	0.662764	0.970253	-0.447583	0.670222	0.421481	0.852544	-0.569012	-1.05421	-1.01001	0.9753	-1.00877	-1.54064	-1.14456	0.948413	-0.379814	0.681912	0.202552	0.793352	-0.598933	-1.02531	-0.975158	0.928349	-0.957709	-1.48945	-1.20632	0.938103	-0.376411	0.77196	0.122703	0.79924	-0.603912	-1.0104	-0.965233	0.928992	-0.973728	-1.59797	-1.20566	0.938649	-0.365092	0.764807	0.0720117	0.825365	-0.607061	-1.00733	-0.969136	0.948446	-1.01035
16	3	nucleoli and cytoplasm	0.182449	-0.305597	-0.253955	0.369509	0.42271	-0.0292556	0.480826	0.314581	0.244919	-0.151633	0.0550041	-0.316961	0.73928	-0.196834	-0.219242	0.41732	0.384381	0.0865981	0.383329	0.217691	0.142148	-0.0168762	-0.0362584	-0.408709	0.677376	-0.163563	-0.163121	0.475027	0.351214	0.0779719	0.342976	0.190363	0.12781	-0.00569622	-0.0125031	-0.406648	0.611969	-0.153981	-0.0988154	0.508862	0.358623	0.0485231	0.331134	0.184084	0.133122	-0.0185354	0.0301827
16	4	cytoskeleton	0.139791	-0.83736	0.155551	-0.716587	-0.361182	-0.812354	0.132571	0.831968	0.831279	-0.90252	0.88122	1.03169	0.677055	-0.86499	0.0804072	-0.597008	-0.328869	-0.729535	0.146257	0.839361	0.808524	-0.894867	0.837356	1.01127	0.73624	-0.86969	0.0663759	-0.49544	-0.305135	-0.709006	0.151391	0.836433	0.798255	-0.886085	0.827723	0.966238	0.783649	-0.885836	0.0959646	-0.373989	-0.258334	-0.734045	0.179033	0.849156	0.814557	-0.907689	0.861711
16	5	cytoskeleton	0.296311	0.189217	-0.274731	0.479255	0.128133	0.247528	0.0665344	-0.147236	-0.15911	0.207115	-0.196525	-0.413026	0.34182	0.257458	-0.280969	0.5529	0.130091	0.333367	0.0386374	-0.21513	-0.234541	0.301913	-0.292364	-0.662394	0.318063	0.275648	-0.292655	0.665214	0.105607	0.351868	0.0169635	-0.233526	-0.25238	0.32729	-0.310661	-0.797197	0.286311	0.280791	-0.202691	0.726514	0.427913	0.312981	0.155766	-0.219727	-0.228798	0.301055	-0.258961
16	6	nucleoplasm	0.277994	0.982732	-0.452355	0.621259	-0.445345	0.80839	-0.791988	-1.04261	-0.98896	0.916762	-0.927292	-0.893338	-1.26567	0.958471	-0.405195	0.637938	-0.438778	0.769694	-0.761123	-1.01517	-0.961105	0.889634	-0.907432	-1.02023	-1.26972	0.947367	-0.431872	0.700326	-0.44585	0.776668	-0.748686	-1.0021	-0.952914	0.89357	-0.926575	-1.0777	-1.27098	0.946469	-0.470779	0.675616	-0.446314	0.799109	-0.739764	-0.998757	-0.955899	0.910545	-0.958364
16	7	structured cytoplasm	0.35442	-1.61587	1.13314	-0.583787	0.715455	-1.56122	1.60138	1.62452	1.64863	-1.57786	1.5029	0.881116	1.02195	-1.49471	0.895786	-0.336589	0.840876	-1.27192	1.60721	1.53908	1.50021	-1.34084	1.27115	0.626249	1.09951	-1.45338	0.723561	-0.0605895	0.837192	-1.15936	1.579	1.50803	1.43943	-1.24025	1.17316	0.401605	1.15584	-1.43281	0.633676	0.250978	0.890632	-1.12273	1.59223	1.49464	1.41655	-1.19952	1.13106
16	8	ER	0.160872	0.166646	-0.310474	0.423444	-0.0474682	0.336301	-0.0503819	-0.10771	-0.170798	0.283022	-0.284833	-0.481827	0.482104	0.192044	-0.21639	0.355665	-0.0706709	0.26143	-0.0864468	-0.122639	-0.155923	0.233993	-0.19749	-0.304975	0.376841	0.190599	-0.127779	0.25492	-0.0933244	0.189657	-0.105874	-0.121269	-0.135127	0.179234	-0.115016	-0.118539	0.277849	0.176677	-0.0154302	0.128321	-0.105751	0.128254	-0.116328	-0.108954	-0.111177	0.130793	-0.0428844
16	9	plasma membrane	0.130747	0.474105	-0.353028	0.538167	0.297475	0.503406	-0.0574541	-0.418447	-0.440644	0.494763	-0.483332	-0.587773	0.0403137	0.49729	-0.309133	0.57548	0.259456	0.509096	-0.10246	-0.438823	-0.457183	0.526188	-0.503204	-0.727511	0.0202557	0.500765	-0.28248	0.640185	0.261716	0.489344	-0.109723	-0.440631	-0.44922	0.514619	-0.482716	-0.746307	-0.0265455	0.498768	-0.274853	0.664752	0.210156	0.470354	-0.132746	-0.438787	-0.442067	0.498122	-0.460014
16	10	nucleoplasm	0.216937	0.818178	-0.434209	0.618258	-0.143816	0.743113	-0.524837	-0.824866	-0.809586	0.807939	-0.812158	-0.995028	-0.493047	0.809929	-0.364484	0.586779	-0.234256	0.676541	-0.545721	-0.817286	-0.786668	0.763237	-0.74811	-0.845601	-0.599686	0.801516	-0.329917	0.562328	-0.212909	0.657087	-0.531708	-0.805818	-0.771248	0.749038	-0.728376	-0.710127	-0.665056	0.798603	-0.283412	0.467351	-0.214785	0.659019	-0.527979	-0.8003	-0.767463	0.751045	-0.729083
16	11	ER	0.619469	-1.23186	2.55802	-2.74158	0.135235	-1.78035	0.666972	1.23646	1.36591	-1.50351	1.72193	1.79796	-0.197411	-1.5647	2.38009	-3.04714	0.134025	-2.1786	0.841594	1.50777	1.67984	-1.85749	2.0205	1.88486	0.0162172	-1.68334	2.0699	-2.91239	0.0176421	-2.24988	0.813952	1.57507	1.74559	-1.94735	2.02976	1.87684	0.24286	-1.72735	2.00888	-2.20271	0.0499239	-2.27699	0.888329	1.61937	1.78591	-1.96793	2.01413
16	12	nucleoplasm and cytoplasm	0.189056	0.594518	-0.317908	0.476022	0.00725921	0.509841	-0.313923	-0.563761	-0.544187	0.551326	-0.497857	-0.35305	-0.165515	0.610391	-0.311844	0.592104	0.191974	0.547043	-0.262361	-0.577538	-0.56881	0.591424	-0.558494	-0.673955	-0.114359	0.611952	-0.354231	0.766507	0.212827	0.579402	-0.256535	-0.5785	-0.578827	0.621202	-0.603998	-0.94893	-0.0900986	0.617874	-0.450501	0.907732	0.194489	0.604581	-0.264642	-0.58516	-0.590228	0.642598	-0.638258
16	13	ERGIC	0.210396	-0.347999	0.188785	0.0468231	0.484391	-0.394328	0.588551	0.480463	0.48827	-0.422081	0.521912	0.459094	0.792455	-0.303753	0.0739801	0.217213	0.618519	-0.261357	0.600071	0.447396	0.42261	-0.33979	0.414991	0.248789	0.86166	-0.288821	0.089602	0.350816	0.651238	-0.220918	0.589855	0.433786	0.399173	-0.304787	0.386139	0.111761	0.87094	-0.289204	0.107341	0.437241	0.565037	-0.2149	0.532609	0.425109	0.391949	-0.2989	0.386027
16	14	ER	0.207861	0.810204	-0.432142	0.573882	-0.464152	0.720539	-0.655551	-0.82717	-0.806016	0.785779	-0.786852	-0.846897	-0.734876	0.796801	-0.381041	0.541202	-0.51167	0.667427	-0.654667	-0.810378	-0.779717	0.750945	-0.744489	-0.76957	-0.786284	0.789268	-0.397245	0.540472	-0.510851	0.652441	-0.644113	-0.801515	-0.768503	0.740145	-0.735543	-0.701125	-0.83069	0.785243	-0.422787	0.459007	-0.507448	0.654253	-0.635695	-0.795322	-0.764095	0.741332	-0.740189
16	15	ER	0.304568	0.753623	-0.423897	0.539913	-0.567343	0.677462	-0.66488	-0.770656	-0.752553	0.734563	-0.734658	-0.786776	-0.67336	0.74366	-0.373656	0.490965	-0.600729	0.625966	-0.66033	-0.756652	-0.727475	0.700008	-0.69268	-0.675092	-0.72728	0.737179	-0.391941	0.459934	-0.600899	0.612535	-0.650303	-0.749291	-0.717529	0.690918	-0.685502	-0.609902	-0.769755	0.735314	-0.42826	0.364268	-0.605456	0.616461	-0.646485	-0.746831	-0.716628	0.694529	-0.694307
16	16	structured cytoplasm	0.394102	-0.148247	0.0994071	-0.0737216	0.225972	-0.236551	0.244262	0.256397	0.269465	-0.240009	0.345377	0.535109	0.53357	-0.153919	-0.0114173	0.152889	0.372323	-0.152063	0.28218	0.262242	0.24407	-0.214843	0.279675	0.323643	0.642674	-0.144585	-0.0880215	0.384197	0.371164	-0.0783406	0.25903	0.24537	0.208148	-0.165871	0.207317	0.0814373	0.699649	-0.133495	-0.170745	0.603637	0.379873	-0.0338837	0.248444	0.230316	0.186582	-0.131403	0.159739
16	17	nucleoli	0.173693	1.07344	-0.460161	0.396105	-0.946706	0.860107	-1.05508	-1.17583	-1.10489	0.994454	-1.02597	-0.657921	-2.08812	1.03105	-0.394034	-0.194135	-0.968062	0.795365	-1.01065	-1.12252	-1.04986	0.939189	-0.968654	-0.104199	-2.11692	1.01426	-0.405564	-1.17723	-0.965985	0.803389	-0.988364	-1.10283	-1.03801	0.942505	-0.990476	0.221008	-2.12396	1.00752	-0.426293	-2.3258	-0.964207	0.829005	-0.973899	-1.09248	-1.03712	0.95922	-1.02472
16	18	nucleoli	0.287962	0.102544	-0.434934	-0.0285262	-0.940899	0.408583	-0.88067	-0.388643	-0.412347	0.283664	-0.453181	0.198415	-0.682648	0.242504	-0.416826	0.0230564	-0.954976	0.518504	-0.868965	-0.501413	-0.528224	0.457377	-0.584253	-0.00210878	-0.66998	0.292867	-0.481098	0.00578542	-0.944623	0.568118	-0.852244	-0.534235	-0.564051	0.526026	-0.648155	-0.18263	-0.640721	0.332721	-0.580864	-0.0265699	-0.939846	0.623152	-0.840425	-0.55727	-0.591585	0.593631	-0.715206
16	19	nucleoli	0.341267	0.695731	-0.465558	-0.0593535	-1.03129	0.661629	-1.07928	-0.922728	-0.883708	0.630566	-0.761402	0.425993	-2.21599	0.958436	-0.435181	-0.112054	-1.04038	0.788778	-1.04893	-1.07314	-1.01421	0.89901	-0.950048	0.102413	-2.14957	0.97526	-0.491144	-0.837382	-1.03204	0.82333	-1.02432	-1.0823	-1.02836	0.944532	-1.01901	-0.191657	-2.07796	0.990644	-0.584858	-1.74166	-1.02933	0.865805	-1.01078	-1.09504	-1.04742	0.984896	-1.08709
16	20	ER	0.137314	-0.74378	0.423362	-1.13394	-0.453809	-0.923774	-0.0146718	0.651557	0.719183	-0.872473	0.856488	1.15808	-0.0530765	-0.810152	0.167775	-0.941274	-0.514297	-0.841175	-0.0280374	0.661159	0.698447	-0.891182	0.790673	1.12789	0.0614462	-0.791922	0.0479518	-0.657844	-0.490596	-0.748191	-0.0017759	0.641423	0.65623	-0.832151	0.700291	0.965244	0.186326	-0.796314	-0.0256496	-0.169159	-0.412904	-0.701646	0.066977	0.6587	0.658131	-0.802029	0.655178
16	21	nucleoplasm	0.354759	1.00185	-0.467486	0.652668	-0.513528	0.845428	-0.842022	-1.07485	-1.02465	0.957458	-0.990267	-1.20453	-1.41482	0.975275	-0.418598	0.6509	-0.555383	0.792376	-0.819513	-1.04423	-0.989962	0.917159	-0.950246	-1.22681	-1.44613	0.964174	-0.457163	0.712542	-0.571786	0.796732	-0.807246	-1.03118	-0.98119	0.916472	-0.965041	-1.27373	-1.44928	0.963747	-0.512037	0.665327	-0.581908	0.82061	-0.79984	-1.02889	-0.985013	0.933598	-0.999278
16	22	uniform cytoplasm	0.715077	0.464519	-0.347626	0.508457	-0.0250327	0.467396	-0.210001	-0.405761	-0.420288	0.465051	-0.43219	-0.506907	0.175871	0.485039	-0.315782	0.537927	-0.0359656	0.48971	-0.23094	-0.425818	-0.440711	0.501028	-0.47155	-0.659832	0.167316	0.491374	-0.322368	0.620827	-0.0371228	0.486057	-0.234848	-0.432525	-0.442409	0.505394	-0.471422	-0.712309	0.118538	0.491572	-0.357901	0.658989	-0.0659855	0.478258	-0.248477	-0.43343	-0.439404	0.498759	-0.461488
16	23	vesicles	1	-0.933352	0.123362	-0.825174	-0.346079	-0.903416	0.0302192	0.813742	0.812792	-1.00262	0.903474	1.15813	0.410944	-0.974571	0.00853978	-0.813405	-0.417294	-0.81985	-0.0411316	0.772246	0.759218	-0.992322	0.828331	1.17866	0.442405	-0.956957	-0.0497516	-0.637357	-0.400861	-0.747275	-0.041642	0.73878	0.71709	-0.942603	0.767191	1.13384	0.516015	-0.937174	-0.116896	-0.345443	-0.3913	-0.659766	-0.0400815	0.71154	0.677671	-0.874481	0.694637
16	24	mitochondria	0.319343	0.3343	0.0651145	0.410194	1.92913	0.30945	0.579606	-0.219562	-0.241065	0.332598	-0.221545	-0.149219	0.271097	0.309181	0.564273	-0.0148796	1.44307	0.111924	0.369074	-0.180672	-0.15442	0.205781	-0.00618006	0.463296	0.0598766	0.259524	1.23762	-0.512761	1.23839	0.0153571	0.297587	-0.122064	-0.0763449	0.122992	0.12551	0.863709	-0.0289466	0.22348	2.0189	-0.908328	1.09331	-0.0453317	0.248949	-0.0890449	-0.0400366	0.0732429	0.211782
16	25	cytoskeleton	0.0924588	-0.172233	-0.352291	0.444	-0.295278	0.215839	-0.0462687	0.162838	0.0588042	0.0851144	-0.155935	-0.472949	0.714953	-0.0821567	-0.29432	0.395844	-0.296588	0.236721	-0.0694996	0.0906152	0.00945457	0.148763	-0.17644	-0.499254	0.62323	-0.068349	-0.254211	0.364488	-0.252308	0.184487	-0.0443192	0.0895963	0.0272642	0.10871	-0.115083	-0.487485	0.564108	-0.066136	-0.205295	0.332634	-0.205856	0.133972	-0.0190388	0.0941532	0.0446095	0.066058	-0.0552782
16	26	nucleoplasm	0.467804	0.115412	-0.0629468	-0.897175	-0.598368	-0.0251324	-0.521425	-0.10035	-0.092529	-0.0107852	0.10521	1.20477	-0.363785	-0.046361	-0.180847	-0.657822	-0.625591	-0.0635086	-0.528633	-0.0324639	-0.0367288	-0.169079	0.168914	1.2833	-0.279207	-0.056397	-0.25582	-0.361785	-0.590984	-0.0307154	-0.514374	-0.0493135	-0.060525	-0.162191	0.131013	1.25875	-0.20651	-0.0314354	-0.357759	-0.0988002	-0.601567	0.0431598	-0.527593	-0.0932715	-0.108603	-0.10991	0.0557009
16	27	nucleoli	0.328569	-0.170964	-0.313946	-0.345227	-0.853036	-0.0729279	-0.726395	-0.0617597	-0.0655651	-0.197694	0.0428954	0.809921	-0.632215	-0.174501	-0.320753	-0.327513	-0.860836	-0.0236073	-0.727907	-0.120719	-0.122422	-0.188586	-0.00461839	0.925629	-0.688573	-0.150316	-0.384184	-0.264326	-0.846189	0.0468205	-0.718358	-0.156671	-0.166403	-0.130853	-0.0774197	0.948204	-0.640426	-0.159405	-0.450562	-0.121252	-0.812975	0.0535566	-0.674396	-0.135655	-0.148521	-0.110908	-0.0967005
16	28	structured cytoplasm	0.338923	-0.469878	0.960291	-0.536086	0.208727	-0.719956	0.400371	0.521196	0.592059	-0.614058	0.72813	0.804255	0.23611	-0.533688	0.904048	-0.326412	0.515251	-0.732584	0.585766	0.576452	0.638701	-0.664773	0.744319	0.724967	0.337671	-0.541977	0.858308	-0.0700023	0.714356	-0.691965	0.674604	0.583634	0.629834	-0.646131	0.700792	0.589491	0.422996	-0.542193	0.682583	0.228991	0.78629	-0.649789	0.697037	0.580521	0.613155	-0.624313	0.654536
16	29	nucleoplasm and cytoplasm	0.386286	-1.31777	3.37937	-1.76773	0.827475	-1.9711	1.34746	1.35772	1.56963	-1.57054	1.78121	1.28932	0.0810231	-1.42568	3.43177	-1.66371	1.16502	-2.17194	1.76119	1.50868	1.7534	-1.69186	1.91792	1.23297	0.264615	-1.44872	3.45855	-1.29646	1.27912	-2.17899	1.90108	1.54871	1.78006	-1.6939	1.88683	1.10495	0.430495	-1.4531	3.08718	-0.697981	1.30683	-2.15945	1.9685	1.56232	1.76984	-1.67833	1.82563
16	30	mitochondria	0.129407	0.244542	-0.379299	0.221531	-0.709259	0.380144	-0.595946	-0.309344	-0.339584	0.315111	-0.359144	-0.122401	-0.0979338	0.261715	-0.275502	-0.195453	-0.717832	0.290214	-0.58581	-0.312527	-0.312886	0.258752	-0.265186	0.24438	-0.22222	0.245601	-0.203865	-0.643164	-0.687893	0.244495	-0.560233	-0.293448	-0.287732	0.224424	-0.210031	0.471235	-0.27743	0.222645	-0.141513	-0.902126	-0.663362	0.210962	-0.535199	-0.269006	-0.263078	0.198796	-0.169589
16	31	cytoskeleton	0.156727	-0.72645	-0.11385	0.291013	0.291739	-0.370454	0.733803	0.740664	0.664423	-0.560008	0.472927	0.065774	1.08181	-0.572361	-0.12643	0.354017	0.347608	-0.155583	0.668431	0.606013	0.508415	-0.330829	0.285036	-0.156943	1.04457	-0.52983	-0.087861	0.405081	0.349588	-0.121829	0.638761	0.570021	0.474588	-0.279123	0.265238	-0.283198	1.01233	-0.519212	-0.0421109	0.440964	0.33674	-0.135494	0.605899	0.557167	0.470212	-0.28238	0.284973
16	32	focal	0.505701	-0.0905783	0.0511898	-0.0502726	0.0365133	-0.178421	0.126119	0.161167	0.181547	-0.17016	0.247482	0.395885	0.359938	-0.0829416	-0.0419414	0.119686	0.0795094	-0.0920583	0.128952	0.154855	0.149735	-0.127321	0.176672	0.222011	0.442814	-0.0788294	-0.0816695	0.269496	0.0684292	-0.0417244	0.112227	0.147749	0.129702	-0.0917293	0.132002	0.0684177	0.476318	-0.0782181	-0.0913943	0.384139	0.0867435	-0.0185829	0.111242	0.145043	0.122649	-0.0755702	0.114859
16	33	nucleoli	0.3254	0.288043	-0.362912	0.461061	-0.28836	0.431948	-0.262386	-0.233168	-0.292705	0.382758	-0.364939	-0.486527	0.486442	0.297976	-0.246653	0.252148	-0.340455	0.325695	-0.302575	-0.232928	-0.249902	0.323371	-0.25725	-0.130506	0.333838	0.29125	-0.101743	-0.144783	-0.360574	0.247307	-0.31493	-0.227182	-0.222252	0.269085	-0.162837	0.201112	0.188151	0.272922	0.139229	-0.657386	-0.360596	0.179845	-0.315034	-0.209956	-0.193709	0.217522	-0.0735516
16	34	uniform cytoplasm	0.451995	-1.23312	0.0561596	0.297484	1.03889	-0.813598	1.58047	1.29421	1.18724	-1.0236	0.878079	0.171866	1.33313	-1.05353	-0.0154362	0.380829	1.03934	-0.515442	1.43197	1.14984	1.00255	-0.73905	0.632617	-0.0771783	1.30345	-0.998	0.0284245	0.463767	0.968815	-0.48659	1.33565	1.09919	0.960134	-0.692213	0.625362	-0.167022	1.25513	-0.988128	0.159177	0.512128	1.07355	-0.569726	1.35717	1.09797	0.985025	-0.744093	0.717568
16	35	uniform cytoplasm	0.176437	-0.728518	0.116955	-0.183012	0.0249571	-0.696372	0.462524	0.754968	0.746497	-0.762053	0.725084	0.609649	0.598961	-0.711999	-0.0280405	0.0157636	-0.00114613	-0.51949	0.395529	0.729339	0.673847	-0.672502	0.58761	0.434705	0.664752	-0.677264	-0.109993	0.225203	-0.0170039	-0.417534	0.360614	0.690307	0.614897	-0.589584	0.493857	0.241714	0.705863	-0.657674	-0.194766	0.401256	-0.0525299	-0.356214	0.317673	0.659855	0.57669	-0.539609	0.434547
16	36	ER	0.125745	0.524871	-0.420316	0.546796	-0.422684	0.596612	-0.456423	-0.498337	-0.530521	0.595557	-0.596814	-0.766182	0.0965606	0.536091	-0.361012	0.485713	-0.465415	0.534006	-0.474234	-0.505084	-0.513942	0.561711	-0.539332	-0.603974	-0.00336245	0.535405	-0.361811	0.436273	-0.47911	0.49788	-0.478291	-0.504546	-0.501951	0.53109	-0.498808	-0.472149	-0.090696	0.531718	-0.355621	0.307631	-0.467798	0.474833	-0.469983	-0.499121	-0.491224	0.512865	-0.469588
16	37	nucleoli	0.192263	0.936655	-0.330953	0.440222	-0.14215	0.760794	-0.684186	-0.9797	-0.930717	0.878679	-0.858102	-0.508325	-1.24176	0.896815	-0.100053	-0.0877214	-0.292893	0.669285	-0.697736	-0.927183	-0.86849	0.807875	-0.762114	0.0839632	-1.34361	0.869274	0.197977	-0.960237	-0.352219	0.652034	-0.697656	-0.891876	-0.835659	0.786583	-0.735297	0.47833	-1.36907	0.855542	0.633979	-2.00817	-0.396714	0.655736	-0.698749	-0.874454	-0.826041	0.786504	-0.733726
16	38	mitochondria	0.225657	0.718761	-0.415584	0.367485	-0.758197	0.644112	-0.764897	-0.729337	-0.716047	0.697241	-0.676965	-0.465786	-0.50213	0.691051	-0.338943	0.117844	-0.757025	0.559835	-0.734207	-0.693793	-0.664369	0.628193	-0.590398	-0.122728	-0.587381	0.673922	-0.32845	-0.198786	-0.74916	0.531965	-0.719712	-0.676789	-0.645253	0.603073	-0.560575	0.116666	-0.656816	0.661946	-0.312176	-0.471783	-0.727849	0.520289	-0.700253	-0.662733	-0.632871	0.593538	-0.545745
16	39	Golgi	0.264899	-0.330401	0.187598	-0.435469	-0.268824	-0.388267	-0.0502672	0.362404	0.372272	-0.409238	0.457419	0.755755	0.323865	-0.379834	0.0524328	-0.213599	-0.242154	-0.351441	-0.0349406	0.389036	0.373865	-0.430896	0.427264	0.663681	0.410636	-0.383039	-0.030721	-0.0291958	-0.227947	-0.312155	-0.0309329	0.38275	0.355688	-0.409777	0.384548	0.528631	0.473311	-0.370393	-0.123544	0.161753	-0.245991	-0.261236	-0.0510967	0.358624	0.325458	-0.374004	0.332295
16	40	nucleoli	0.22516	1.01673	-0.462167	0.38325	-0.954484	0.828466	-1.02349	-1.09711	-1.03788	0.948015	-0.964664	-0.621513	-1.64354	0.97642	-0.400503	-0.161908	-0.966958	0.761279	-0.980355	-1.04777	-0.983677	0.892407	-0.903879	-0.108231	-1.70117	0.958652	-0.408222	-1.18008	-0.959309	0.761462	-0.957408	-1.0275	-0.969178	0.889791	-0.912548	0.278776	-1.74644	0.951096	-0.421762	-2.42814	-0.956916	0.780452	-0.943848	-1.01737	-0.966866	0.901176	-0.935589
16	41	Golgi	0.134162	0.0829468	-0.108298	-0.160414	-0.459915	-0.00921852	-0.302804	-0.0388052	-0.0184787	-0.000487806	0.0631125	0.40013	0.133046	0.0633702	-0.156476	-0.017251	-0.438109	0.02906	-0.283202	-0.0279398	-0.026315	-0.00307621	0.0347599	0.278411	0.203364	0.0668596	-0.202648	0.0415398	-0.45978	0.0626182	-0.30147	-0.0413804	-0.045973	0.0191726	0.000175053	0.158929	0.227596	0.070239	-0.240017	0.125857	-0.466534	0.0710291	-0.309271	-0.0510093	-0.0543128	0.0244241	-0.00384011
16	42	nucleoplasm and cytoplasm	0.118625	-0.0655899	0.121139	-0.0982221	0.144302	-0.165166	0.138833	0.159183	0.176177	-0.157376	0.260369	0.512524	0.353147	-0.0779261	0.00942973	0.118418	0.275099	-0.103882	0.174082	0.169057	0.160558	-0.142864	0.20996	0.332239	0.457129	-0.0752215	-0.0472946	0.320932	0.316332	-0.0571782	0.176942	0.161735	0.13883	-0.112736	0.162325	0.146047	0.508568	-0.07557	-0.103519	0.492907	0.31921	-0.0359144	0.171815	0.158456	0.131733	-0.0984112	0.138969
16	43	mitochondria	0.368465	0.35849	-0.331001	0.188393	-0.641586	0.34209	-0.542426	-0.351168	-0.354153	0.334899	-0.31636	-0.10727	-0.174968	0.337647	-0.263715	0.0862216	-0.600229	0.296012	-0.495235	-0.320964	-0.31905	0.294654	-0.264694	0.0371092	-0.201478	0.319859	-0.22938	-0.105424	-0.568951	0.25413	-0.474663	-0.303269	-0.296629	0.259716	-0.218637	0.202434	-0.247388	0.305628	-0.229141	-0.199273	-0.58006	0.230207	-0.477842	-0.294011	-0.28588	0.238777	-0.193
16	44	nucleoplasm and cytoplasm	0.0836732	-0.130848	-0.0620626	0.408388	1.20537	-0.0758998	0.841379	0.238614	0.211998	-0.130676	0.164516	-0.0184147	0.608741	-0.0591539	-0.120952	0.53167	1.32085	0.0794253	0.781515	0.180047	0.122512	0.00521308	0.0132529	-0.351096	0.652696	-0.0384899	-0.140611	0.722546	1.35868	0.128289	0.758823	0.163926	0.0983757	0.0548169	-0.0352593	-0.619407	0.671399	-0.0294355	-0.164108	0.858764	1.31939	0.139134	0.718524	0.152312	0.0877944	0.0686215	-0.0473724
16	45	nucleoli and cytoplasm	0.251656	0.152609	-0.385749	0.52908	-0.182756	0.456007	-0.107362	-0.0949577	-0.199782	0.372557	-0.393192	-0.73464	0.744403	0.187916	-0.320242	0.476895	-0.255336	0.382887	-0.172994	-0.120764	-0.189606	0.343621	-0.319774	-0.563765	0.620359	0.190096	-0.277495	0.397197	-0.278719	0.302238	-0.194194	-0.121113	-0.16418	0.267244	-0.219539	-0.351848	0.499004	0.187627	-0.236911	0.28167	-0.294661	0.240301	-0.207085	-0.119727	-0.147507	0.214051	-0.143357
16	47	structured cytoplasm	0.333613	-0.456638	1.03911	-0.640599	0.507748	-0.725189	0.620179	0.57148	0.653414	-0.61962	0.786104	0.904333	0.26222	-0.506812	0.776155	-0.325316	0.79117	-0.713628	0.762341	0.630239	0.680806	-0.659436	0.784035	0.778971	0.399339	-0.526733	0.674899	-0.073943	0.901733	-0.679745	0.800228	0.649581	0.679214	-0.656384	0.752856	0.613958	0.495115	-0.53174	0.605729	0.190189	0.988198	-0.657717	0.825346	0.653981	0.673457	-0.647165	0.727425
16	48	ER	0.0478743	0.178998	-0.160266	0.164624	-0.211961	0.117693	-0.159748	-0.114435	-0.110571	0.118869	-0.0537133	0.103556	0.13378	0.164382	-0.105959	0.141298	-0.145814	0.0990508	-0.132693	-0.091681	-0.0875098	0.0909681	-0.0204711	0.171942	0.135029	0.153997	-0.00911237	0.0542366	-0.117947	0.0633761	-0.128966	-0.0829756	-0.0741965	0.0674965	0.0206	0.289854	0.0879886	0.137117	0.0749317	-0.0393893	-0.147891	0.0293062	-0.144543	-0.0717709	-0.0588782	0.0417217	0.0599683
17	1	nucleoplasm	0	0.595163	-0.390084	0.5297	-0.0130691	0.569515	-0.371885	-0.623712	-0.612777	0.595217	-0.613135	-0.642577	-0.411085	0.610577	-0.333948	0.547073	-0.000775675	0.572457	-0.370556	-0.635243	-0.624484	0.617288	-0.627242	-0.761659	-0.431442	0.611109	-0.316673	0.599058	-0.0154426	0.579237	-0.374577	-0.633369	-0.623801	0.626478	-0.634379	-0.798769	-0.455468	0.613516	-0.303084	0.605362	-0.0220746	0.588809	-0.376373	-0.633225	-0.625285	0.636866	-0.642421
17	2	structured cytoplasm	0.240681	0.459772	-0.36762	0.553021	0.216147	0.528479	-0.069663	-0.414378	-0.445792	0.515048	-0.522015	-0.677073	-0.0369381	0.486959	-0.306907	0.535072	0.167121	0.493498	-0.120109	-0.437733	-0.45052	0.512303	-0.494773	-0.669973	-0.100613	0.490622	-0.253188	0.528845	0.161111	0.457792	-0.131313	-0.440052	-0.439408	0.488926	-0.455953	-0.602259	-0.16488	0.490293	-0.220501	0.524292	0.168351	0.433719	-0.133554	-0.437881	-0.429927	0.472875	-0.430694
17	3	nucleoli and cytoplasm	0.149956	-0.0664328	-0.279959	0.481339	0.361595	0.117464	0.403434	0.152623	0.0901027	0.0122801	-0.0379065	-0.343473	0.675436	0.010209	-0.241646	0.51984	0.323177	0.183356	0.322348	0.0823719	0.0238987	0.102206	-0.107764	-0.498382	0.63285	0.0316844	-0.160181	0.572215	0.380279	0.132357	0.334636	0.068031	0.030484	0.077375	-0.049834	-0.49869	0.567992	0.0355552	-0.144137	0.623246	0.320485	0.0937223	0.292172	0.0607255	0.0362927	0.0531406	-0.00727885
17	4	cytoskeleton	0.179457	-0.929326	0.348312	-0.260084	0.353353	-0.966803	0.949846	0.971572	1.01451	-0.973174	0.952042	0.639252	0.823747	-0.800624	0.189434	0.0087063	0.515052	-0.6951	0.977236	0.870502	0.857986	-0.771592	0.740013	0.381303	0.870695	-0.760232	0.200968	0.161614	0.562463	-0.616047	0.978004	0.843979	0.813631	-0.702396	0.685698	0.189485	0.89857	-0.744282	0.216694	0.312236	0.57204	-0.593909	0.963349	0.830646	0.797747	-0.674346	0.666831
17	5	cytoskeleton	0.39173	-0.76818	1.14401	-0.949205	0.437951	-1.02235	0.664653	0.851201	0.899758	-0.921525	1.05	0.980123	0.383329	-0.932757	0.981693	-0.849195	0.604236	-1.17306	0.772971	0.98729	1.03371	-1.08437	1.16289	0.914058	0.505278	-0.997524	0.881656	-0.626681	0.620197	-1.20904	0.784258	1.02723	1.07066	-1.12585	1.16926	0.828317	0.604149	-1.02189	0.829526	-0.259753	0.632556	-1.2204	0.788796	1.04103	1.08316	-1.13295	1.1537
17	6	nucleoplasm	0.159848	0.782708	-0.421865	0.59026	-0.212099	0.701855	-0.534818	-0.791505	-0.771788	0.763019	-0.755959	-0.824581	-0.50278	0.779977	-0.371774	0.595665	-0.232683	0.683887	-0.534273	-0.789106	-0.766652	0.764663	-0.758706	-0.947456	-0.535043	0.77429	-0.367294	0.616855	-0.244454	0.683585	-0.531731	-0.782137	-0.76084	0.765274	-0.764077	-0.998463	-0.569233	0.773177	-0.380228	0.613194	-0.261685	0.691964	-0.532575	-0.779127	-0.760161	0.77015	-0.773428
17	7	structured cytoplasm	0.419776	0.382286	-0.207001	0.0466715	-0.308759	0.258874	-0.40646	-0.358724	-0.337588	0.298033	-0.235406	0.161725	-0.210198	0.328633	-0.22584	0.171334	-0.26249	0.247775	-0.381334	-0.327679	-0.314709	0.257591	-0.231283	0.00480557	-0.135966	0.31868	-0.276069	0.337563	-0.251498	0.27128	-0.377267	-0.327216	-0.320588	0.270505	-0.264163	-0.140634	-0.0955895	0.321348	-0.355174	0.473976	-0.276877	0.30889	-0.390109	-0.338175	-0.336312	0.294972	-0.305431
17	8	ER	0.24529	-0.205433	-0.267524	0.376408	0.0252697	0.126294	0.197815	0.266629	0.158556	-0.0017519	-0.0154074	-0.265823	0.902199	-0.148267	-0.202113	0.296777	-0.0288801	0.102491	0.1175	0.219358	0.136119	0.00431757	0.0130009	-0.1869	0.807882	-0.145356	-0.131215	0.206775	-0.0530568	0.0141957	0.089823	0.218195	0.159321	-0.070185	0.112947	-0.0261074	0.711165	-0.158097	-0.00819253	0.0805402	-0.0398455	-0.0738858	0.088359	0.230811	0.188833	-0.14069	0.214031
17	9	plasma membrane	0.256596	-0.686614	-0.0382601	0.302827	0.62269	-0.446265	0.931118	0.792758	0.717196	-0.612344	0.584277	0.128841	1.16477	-0.585185	-0.0641674	0.381546	0.645572	-0.261634	0.85337	0.713796	0.611726	-0.44246	0.421514	-0.100371	1.16466	-0.550151	-0.00195683	0.458008	0.628435	-0.252153	0.805853	0.682571	0.588994	-0.40971	0.424482	-0.173933	1.12006	-0.543469	0.0426278	0.518903	0.554484	-0.299448	0.743154	0.669498	0.591427	-0.436289	0.476125
17	10	nucleoplasm	0.147625	0.971916	-0.436604	0.641746	-0.0035554	0.817274	-0.662354	-1.03054	-0.983156	0.923681	-0.94492	-1.10929	-1.28486	0.947949	-0.369676	0.6237	-0.16039	0.757248	-0.6776	-1.00339	-0.949311	0.879348	-0.892368	-1.00137	-1.34509	0.935431	-0.35501	0.64418	-0.21303	0.757294	-0.67671	-0.987869	-0.937025	0.877164	-0.900401	-0.977479	-1.35206	0.93576	-0.335267	0.563218	-0.249599	0.779515	-0.677039	-0.986592	-0.941571	0.896263	-0.933164
17	11	ER	0.176347	0.429119	-0.318183	0.134865	-0.545257	0.338232	-0.618633	-0.458137	-0.442905	0.35769	-0.345474	0.136086	-0.45332	0.385156	-0.289287	0.0906107	-0.550831	0.314452	-0.608307	-0.439517	-0.420701	0.312173	-0.31884	0.180035	-0.449709	0.377968	-0.323653	0.116386	-0.56236	0.334634	-0.608081	-0.442941	-0.426823	0.32358	-0.34094	0.20298	-0.444286	0.374237	-0.354737	0.0920174	-0.563739	0.362413	-0.601384	-0.441045	-0.43003	0.341063	-0.364523
17	12	nucleoplasm and cytoplasm	0.31597	-0.666294	0.0802769	0.378708	1.40791	-0.506857	1.38717	0.818339	0.764485	-0.628315	0.624531	0.0808831	1.12294	-0.54814	-0.0408269	0.491693	1.41859	-0.252791	1.26016	0.715212	0.614341	-0.414233	0.394482	-0.23377	1.13363	-0.504391	-0.0478592	0.661249	1.42549	-0.176369	1.21505	0.675982	0.562789	-0.332624	0.329633	-0.453567	1.11458	-0.492676	-0.0793118	0.804662	1.37432	-0.166098	1.16258	0.661436	0.550963	-0.314917	0.322833
17	13	ERGIC	0.114999	-0.556086	0.052463	0.303886	1.16791	-0.43681	1.15695	0.679844	0.633202	-0.536642	0.534238	0.140827	0.941219	-0.473463	0.0139126	0.359958	1.11675	-0.27823	1.01531	0.605095	0.5357	-0.403253	0.399368	-0.0428205	0.93252	-0.443513	0.093315	0.463673	1.07977	-0.273549	0.956303	0.577217	0.515922	-0.381532	0.405652	-0.103844	0.898927	-0.439864	0.19301	0.55701	1.01487	-0.314226	0.901831	0.570336	0.522798	-0.404056	0.450547
17	14	ER	0.0537817	0.311317	-0.36871	0.529087	-0.0907426	0.434419	-0.139786	-0.262834	-0.311928	0.391329	-0.395841	-0.576939	0.288946	0.338475	-0.308866	0.50495	-0.145409	0.395951	-0.190885	-0.284294	-0.314137	0.384293	-0.365903	-0.530101	0.214921	0.342079	-0.284897	0.523816	-0.147464	0.342897	-0.196237	-0.285513	-0.298596	0.344269	-0.309625	-0.42657	0.133333	0.339829	-0.261814	0.457505	-0.187651	0.311277	-0.219057	-0.285458	-0.29044	0.323177	-0.275317
17	15	ER	0.348139	0.821694	-0.446937	0.590816	-0.517042	0.744267	-0.697529	-0.848088	-0.827739	0.813076	-0.824401	-0.945243	-0.737469	0.814642	-0.410653	0.598638	-0.55163	0.707871	-0.688362	-0.839601	-0.812421	0.794493	-0.805813	-0.986897	-0.774072	0.810713	-0.449504	0.633399	-0.564142	0.705173	-0.682641	-0.835468	-0.807691	0.790421	-0.810987	-1.01003	-0.807561	0.811506	-0.521605	0.644889	-0.562646	0.716077	-0.675035	-0.83469	-0.808806	0.796639	-0.827042
17	16	structured cytoplasm	0.78189	0.708241	-0.363569	0.314625	-0.539461	0.586648	-0.664419	-0.72453	-0.687952	0.649728	-0.617085	-0.318078	-0.593996	0.705499	-0.357347	0.435119	-0.499097	0.597759	-0.624359	-0.719015	-0.691091	0.662638	-0.648351	-0.55534	-0.546824	0.702726	-0.413843	0.550014	-0.490317	0.621891	-0.613434	-0.716711	-0.696285	0.684066	-0.687014	-0.727483	-0.53335	0.703492	-0.483929	0.573979	-0.492684	0.643202	-0.607938	-0.716699	-0.701359	0.699871	-0.715562
17	17	nucleoli	0.507606	0.96324	-0.477585	0.309863	-1.04762	0.821356	-1.10378	-1.07175	-1.02142	0.904738	-0.943924	0.298377	-1.96474	1.01668	-0.438626	-0.0738235	-1.05176	0.823117	-1.05494	-1.11467	-1.05108	0.961455	-1.01258	-0.929906	-1.8708	1.00492	-0.496368	-0.911512	-1.04131	0.837219	-1.02798	-1.10096	-1.04477	0.968357	-1.04386	-1.07981	-1.83378	1.00485	-0.591939	-1.9087	-1.03714	0.869457	-1.01253	-1.09906	-1.05098	0.989425	-1.08925
17	18	nucleoli	0.339628	0.20064	-0.444704	-0.11508	-0.982391	0.409809	-0.983896	-0.529235	-0.532446	0.232693	-0.429749	0.955859	-1.40098	0.419729	-0.417027	-0.161325	-0.988494	0.490506	-0.962787	-0.675005	-0.661992	0.390321	-0.536168	1.05395	-1.48865	0.595393	-0.483749	-0.2193	-0.983013	0.603467	-0.955885	-0.776928	-0.759501	0.568174	-0.672646	1.00549	-1.49166	0.690863	-0.582615	-0.360963	-0.97903	0.685431	-0.949103	-0.836558	-0.820106	0.682296	-0.780233
17	19	nucleoli	0.265615	0.884283	-0.465029	0.321493	-0.988923	0.765273	-1.06574	-1.0411	-0.988894	0.81941	-0.89351	-0.0300306	-2.08366	0.969893	-0.414356	-0.0840048	-0.999711	0.777383	-1.02556	-1.07769	-1.01451	0.894161	-0.937516	0.0195855	-2.06782	0.979843	-0.443081	-0.971595	-0.993637	0.801764	-1.00321	-1.07816	-1.0204	0.924272	-0.983559	0.147412	-2.05593	0.98742	-0.488373	-2.06574	-0.989766	0.837789	-0.988896	-1.08016	-1.03025	0.956333	-1.03491
17	20	ER	0.364832	-2.12208	-0.181899	-1.92264	-0.90914	-1.30357	-0.293639	1.42958	1.37965	-1.7992	1.21023	1.56859	0.628205	-1.83218	-0.247514	-1.59609	-0.924366	-0.858506	-0.30957	1.19633	1.07118	-1.35152	0.82267	1.27122	0.779186	-1.7313	-0.340851	-1.36319	-0.921926	-0.606612	-0.317821	1.11854	0.943205	-1.09746	0.605595	0.939532	0.921924	-1.63709	-0.46424	-1.05408	-0.924778	-0.41291	-0.338141	1.04219	0.839237	-0.8893	0.428128
17	21	nucleoplasm	0.607266	0.878343	-0.443847	0.630173	-0.24023	0.789146	-0.629565	-0.913034	-0.888715	0.872932	-0.894352	-1.10749	-0.902538	0.862526	-0.378757	0.595341	-0.352829	0.722983	-0.647594	-0.894797	-0.858223	0.826306	-0.833079	-0.991782	-0.981425	0.852851	-0.379984	0.60734	-0.387431	0.711388	-0.647737	-0.883038	-0.844799	0.814007	-0.825217	-0.914052	-1.02291	0.8503	-0.380956	0.507493	-0.41406	0.721275	-0.649313	-0.87864	-0.843431	0.820527	-0.838682
17	22	uniform cytoplasm	0.597671	0.269773	-0.344651	0.564198	0.441496	0.396785	0.161134	-0.17145	-0.229459	0.334369	-0.323774	-0.595486	0.607164	0.310408	-0.277417	0.573228	0.445732	0.391901	0.11472	-0.207899	-0.255004	0.366985	-0.327525	-0.649744	0.541712	0.318204	-0.238295	0.649251	0.401521	0.346101	0.0830747	-0.214644	-0.241881	0.336649	-0.274477	-0.567302	0.452644	0.316383	-0.174742	0.637031	0.335444	0.310849	0.0489557	-0.214768	-0.231621	0.312008	-0.229049
17	23	vesicles	0.298146	0.693363	-0.425146	0.506848	-0.568769	0.679041	-0.633012	-0.693127	-0.697821	0.720973	-0.714931	-0.737609	-0.332696	0.679812	-0.35166	0.351539	-0.612597	0.585113	-0.637638	-0.672882	-0.65404	0.645746	-0.617772	-0.431383	-0.444375	0.669353	-0.343369	0.212105	-0.606424	0.549047	-0.626747	-0.661377	-0.636145	0.615473	-0.580213	-0.23324	-0.523492	0.6616	-0.354073	0.0576738	-0.608483	0.536433	-0.622158	-0.653026	-0.627893	0.604399	-0.566845
17	24	mitochondria	0.381838	0.855354	-0.415777	0.450963	-0.63075	0.727874	-0.776077	-0.88342	-0.851259	0.812889	-0.801359	-0.633625	-0.903732	0.823543	-0.315544	0.108842	-0.702448	0.632396	-0.775356	-0.845913	-0.795948	0.737806	-0.704345	-0.172057	-1.02043	0.807593	-0.287323	-0.32455	-0.719796	0.618528	-0.76832	-0.829918	-0.780728	0.726514	-0.695054	0.051837	-1.07436	0.799129	-0.272943	-0.714527	-0.736694	0.626813	-0.766109	-0.821414	-0.777574	0.730831	-0.705162
17	25	cytoskeleton	0.381418	0.732782	-0.402901	0.489897	-0.627573	0.620835	-0.706328	-0.765618	-0.728822	0.686838	-0.687367	-0.800767	-0.771673	0.734954	-0.390932	0.526801	-0.642046	0.624836	-0.685613	-0.768084	-0.734926	0.693889	-0.705304	-0.914457	-0.786267	0.73411	-0.45185	0.600045	-0.653975	0.644071	-0.679843	-0.767537	-0.739659	0.709524	-0.736123	-1.0226	-0.792572	0.737712	-0.532378	0.622394	-0.626697	0.66322	-0.659847	-0.768426	-0.744362	0.725588	-0.763026
17	26	nucleoplasm	0.227527	-0.443071	0.163914	-0.720255	-0.361156	-0.530317	-0.123519	0.428506	0.437357	-0.543916	0.567441	0.978431	0.168888	-0.580576	0.0566814	-0.597938	-0.371764	-0.569117	-0.125949	0.494353	0.492249	-0.653377	0.605516	0.983173	0.25707	-0.596501	-0.0282135	-0.451792	-0.389077	-0.53287	-0.147256	0.478015	0.467084	-0.64064	0.562876	0.952812	0.314377	-0.619569	-0.0789113	-0.251335	-0.366602	-0.522294	-0.134117	0.48444	0.4727	-0.645976	0.553941
17	27	nucleoli	0.155375	0.285687	-0.263527	-0.0944076	-0.635233	0.199343	-0.611786	-0.362971	-0.336668	0.214909	-0.232248	0.135354	-0.476331	0.232616	-0.264612	-0.038226	-0.625172	0.177248	-0.581062	-0.340909	-0.315837	0.170288	-0.22264	0.086684	-0.450931	0.235156	-0.332028	0.0736774	-0.616294	0.225506	-0.577711	-0.355381	-0.339457	0.200275	-0.274769	0.0611655	-0.426931	0.236674	-0.405633	0.183243	-0.603195	0.27437	-0.572361	-0.362105	-0.355633	0.232976	-0.320325
17	28	structured cytoplasm	0.549333	0.269038	-0.0803191	-0.0311109	-0.205134	0.149694	-0.262681	-0.211648	-0.197993	0.184278	-0.0874049	0.403452	-0.0440432	0.191172	-0.129228	0.139167	-0.0384336	0.123451	-0.194871	-0.168848	-0.16409	0.107408	-0.0517978	0.358797	0.00800605	0.175155	-0.159907	0.305687	0.00224067	0.145032	-0.18645	-0.172007	-0.173899	0.105593	-0.0743404	0.291816	0.0263791	0.171736	-0.208929	0.439937	0.0383455	0.16348	-0.177607	-0.178007	-0.18172	0.112968	-0.091517
17	29	nucleoplasm and cytoplasm	0.576091	-1.61608	2.47811	-3.35307	0.0251387	-2.14187	0.722058	1.54789	1.67636	-1.88751	2.04544	2.15123	-0.107459	-1.97939	2.70384	-3.64608	0.300016	-2.63622	1.15735	1.88959	2.08159	-2.29531	2.44119	2.30309	0.112777	-2.1167	2.84582	-3.40714	0.538015	-2.8242	1.42137	2.03838	2.25182	-2.43311	2.55859	2.34973	0.388386	-2.15493	2.73668	-2.61723	0.629216	-2.85645	1.50238	2.0751	2.2806	-2.45217	2.53391
17	30	mitochondria	0.321771	0.0595448	-0.195192	0.00551192	-0.431026	0.0641754	-0.227483	-0.00909335	-0.0248355	0.0295604	0.0228882	0.279391	0.345803	0.027438	0.0212623	-0.501427	-0.388741	-0.0688542	-0.200454	0.0319551	0.0507777	-0.0734189	0.177847	0.689917	0.216982	-0.00797251	0.298385	-1.15116	-0.354278	-0.172276	-0.176893	0.0665369	0.0996054	-0.146265	0.299859	1.03338	0.112999	-0.05194	0.811783	-1.60758	-0.22912	-0.279234	-0.102528	0.118647	0.162476	-0.219766	0.432088
17	31	cytoskeleton	0.189528	-0.443536	-0.215201	0.391658	0.25485	-0.0937369	0.528426	0.457443	0.367548	-0.257286	0.175323	-0.204769	0.731259	-0.333134	-0.17808	0.392536	0.260597	0.00421594	0.455827	0.371886	0.287105	-0.127938	0.0907994	-0.331905	0.682202	-0.307144	-0.119733	0.403442	0.255928	-0.0142019	0.431115	0.352487	0.279499	-0.125424	0.117027	-0.385583	0.641818	-0.30272	-0.0856669	0.434983	0.250819	-0.0525465	0.409425	0.347619	0.285605	-0.152885	0.158544
17	32	focal	0.632217	0.132071	-0.3501	0.23727	-0.715599	0.293818	-0.516506	-0.140456	-0.186868	0.225824	-0.240156	-0.207132	0.409256	0.166841	-0.313521	0.220864	-0.690692	0.308448	-0.485602	-0.168395	-0.207767	0.25846	-0.258486	-0.216991	0.353938	0.165291	-0.326761	0.193405	-0.66147	0.288897	-0.462176	-0.162856	-0.196932	0.239645	-0.232591	-0.197711	0.315646	0.158461	-0.254493	0.149346	-0.516677	0.243529	-0.376961	-0.142735	-0.166569	0.202472	-0.175102
17	33	nucleoli	0.0974513	0.723182	-0.428394	0.504146	-0.646018	0.662493	-0.698694	-0.742208	-0.728023	0.711329	-0.713094	-0.718579	-0.581541	0.71854	-0.39443	0.48894	-0.665657	0.643135	-0.686403	-0.73385	-0.717213	0.709168	-0.710043	-0.74255	-0.597116	0.715553	-0.432595	0.454977	-0.671914	0.638978	-0.679693	-0.730568	-0.712852	0.706449	-0.713362	-0.726285	-0.634674	0.715858	-0.490394	0.344877	-0.669218	0.643338	-0.672521	-0.729942	-0.712986	0.708162	-0.72133
17	34	uniform cytoplasm	0.248516	0.324562	-0.288318	0.33061	-0.241834	0.317468	-0.241272	-0.266077	-0.273984	0.303483	-0.248917	-0.143331	0.279546	0.348016	-0.280931	0.405405	-0.214836	0.371552	-0.238384	-0.286973	-0.304151	0.355372	-0.311928	-0.348323	0.310976	0.35371	-0.292044	0.465902	-0.231014	0.385857	-0.248805	-0.294231	-0.312373	0.373506	-0.330044	-0.451994	0.287763	0.354413	-0.312166	0.51764	-0.210864	0.376008	-0.239387	-0.293082	-0.307444	0.366747	-0.316724
17	35	uniform cytoplasm	0.254513	-0.236088	-0.307884	0.471935	0.143877	0.12954	0.269751	0.265592	0.158469	-0.027127	-0.0364133	-0.342772	0.77602	-0.138871	-0.278561	0.518522	0.17931	0.226959	0.224114	0.187636	0.0795005	0.117255	-0.142225	-0.542206	0.748338	-0.112493	-0.288626	0.624996	0.140641	0.222745	0.185731	0.162726	0.0684491	0.130496	-0.138274	-0.635353	0.703354	-0.106424	-0.301358	0.683303	0.111983	0.190719	0.16055	0.156807	0.0761761	0.103456	-0.1015
17	36	ER	0.134974	0.639046	-0.429682	0.587826	-0.335677	0.676419	-0.483068	-0.622365	-0.643672	0.702439	-0.710428	-0.939904	-0.122772	0.644205	-0.366734	0.54425	-0.391999	0.597031	-0.503163	-0.624956	-0.621474	0.647165	-0.630296	-0.762785	-0.236957	0.640142	-0.36285	0.528038	-0.403238	0.560035	-0.502295	-0.619609	-0.606073	0.617014	-0.590734	-0.629706	-0.318923	0.635615	-0.359509	0.450377	-0.403033	0.542883	-0.498878	-0.61329	-0.596152	0.603137	-0.570258
17	37	nucleoli	0.219697	0.90364	-0.360905	0.446689	-0.288311	0.741157	-0.688753	-0.939933	-0.897346	0.844373	-0.830983	-0.511799	-1.2056	0.865231	-0.177703	-0.0472878	-0.415131	0.639418	-0.701755	-0.890345	-0.834275	0.769455	-0.726971	0.0748932	-1.31414	0.840392	0.0545802	-0.915927	-0.462321	0.618438	-0.701726	-0.860236	-0.804631	0.750061	-0.701245	0.462101	-1.35492	0.824005	0.404746	-1.99122	-0.497383	0.617935	-0.702169	-0.841401	-0.792011	0.746919	-0.695124
17	38	mitochondria	0.17652	0.248417	-0.370635	-0.0907577	-0.771961	0.337291	-0.732187	-0.44039	-0.430261	0.275526	-0.372946	0.189136	-0.623661	0.288509	-0.306725	-0.326461	-0.767885	0.356996	-0.709976	-0.46912	-0.457141	0.321647	-0.387182	0.401765	-0.644205	0.314943	-0.280506	-0.679627	-0.735442	0.370267	-0.685618	-0.476553	-0.466519	0.350503	-0.390693	0.565908	-0.654689	0.327668	-0.2874	-0.939823	-0.74086	0.392545	-0.682146	-0.48018	-0.474516	0.379236	-0.40641
17	39	Golgi	0.85149	0.409661	-0.412873	0.321528	-0.754284	0.486285	-0.735318	-0.509938	-0.513849	0.459378	-0.533188	-0.402109	-0.50613	0.440725	-0.370446	0.222768	-0.780587	0.498292	-0.728302	-0.530717	-0.532644	0.494423	-0.546362	-0.234289	-0.558991	0.450417	-0.391617	0.0498034	-0.781927	0.513811	-0.720557	-0.537098	-0.540351	0.516409	-0.564014	-0.107602	-0.602584	0.456324	-0.41852	-0.212977	-0.778937	0.528737	-0.708602	-0.536781	-0.542499	0.531984	-0.5772
17	40	nucleoli	0.322911	0.355639	-0.42904	-0.352684	-1.00708	0.439289	-0.981542	-0.586853	-0.570003	0.373257	-0.512894	0.206669	-1.24857	0.443389	-0.405051	-0.563977	-1.01741	0.505109	-0.959059	-0.667817	-0.648819	0.462863	-0.600239	0.114954	-1.24902	0.510907	-0.463445	-1.0882	-1.01281	0.584483	-0.949004	-0.715642	-0.706232	0.556613	-0.699677	0.0321713	-1.21865	0.542504	-0.548553	-1.47715	-1.00488	0.637895	-0.93282	-0.726674	-0.726936	0.614724	-0.763705
17	41	Golgi	0.204236	-0.378334	-0.0797631	0.0919419	-0.15258	-0.2488	0.171909	0.420123	0.381592	-0.340454	0.328623	0.205862	0.690682	-0.330128	-0.140161	0.175713	-0.193142	-0.140844	0.11206	0.374017	0.3179	-0.256556	0.233847	0.101448	0.691227	-0.312016	-0.158086	0.233231	-0.205406	-0.136087	0.0906573	0.355068	0.301143	-0.24833	0.235043	0.0577275	0.668105	-0.30972	-0.166694	0.272999	-0.201326	-0.165884	0.0846627	0.350952	0.30614	-0.270552	0.267715
17	42	nucleoplasm and cytoplasm	0.15675	-0.404815	0.185829	0.0175124	0.432381	-0.408365	0.556108	0.516806	0.509713	-0.451808	0.523777	0.445606	0.780167	-0.386933	0.113793	0.219094	0.681554	-0.330847	0.650054	0.52218	0.489953	-0.408671	0.469012	0.273016	0.859815	-0.378861	0.0711978	0.422268	0.719387	-0.292522	0.642617	0.510631	0.467105	-0.382713	0.435834	0.107833	0.884216	-0.373738	0.0265963	0.591873	0.700627	-0.283335	0.615136	0.498618	0.454626	-0.376471	0.425454
17	43	mitochondria	0.316024	0.221449	-0.244809	0.227822	-0.313858	0.235951	-0.265067	-0.156814	-0.179118	0.211417	-0.152137	0.000569942	0.35677	0.214543	-0.212327	0.190265	-0.321352	0.221828	-0.274081	-0.146793	-0.164305	0.194335	-0.132673	0.0725317	0.33734	0.207059	-0.196416	0.128383	-0.343481	0.19653	-0.288703	-0.143839	-0.155648	0.172078	-0.101161	0.169081	0.283288	0.199529	-0.185929	0.064033	-0.365446	0.175142	-0.302376	-0.141857	-0.150091	0.154875	-0.0739944
17	44	nucleoplasm and cytoplasm	0.232165	0.325605	-0.277027	0.483156	0.550558	0.344447	0.13467	-0.240223	-0.261296	0.321838	-0.275783	-0.345536	0.378406	0.361949	-0.264878	0.56301	0.639897	0.410644	0.121384	-0.27348	-0.307026	0.395603	-0.35969	-0.626915	0.405325	0.370728	-0.286217	0.710761	0.623325	0.432014	0.100405	-0.283028	-0.31825	0.421629	-0.387675	-0.811801	0.390791	0.374123	-0.320445	0.816485	0.576449	0.433978	0.0750011	-0.287592	-0.320783	0.424357	-0.389157
17	45	nucleoli and cytoplasm	0.318748	0.368385	-0.334822	0.419919	-0.156659	0.404536	-0.248472	-0.341215	-0.357806	0.385895	-0.37805	-0.421872	0.0769084	0.394562	-0.294512	0.439916	-0.163155	0.42895	-0.266121	-0.362128	-0.379277	0.427303	-0.411173	-0.536841	0.0619533	0.399013	-0.29103	0.474466	-0.189645	0.421258	-0.27949	-0.365548	-0.377195	0.427077	-0.403181	-0.552016	0.0251167	0.397625	-0.281998	0.479018	-0.188839	0.405576	-0.280713	-0.363335	-0.37032	0.414588	-0.383399
17	47	structured cytoplasm	0.329564	-1.00814	0.311588	-0.171699	0.342434	-0.98313	0.967465	1.06076	1.06829	-1.02869	0.998178	0.707043	0.952313	-0.914882	0.13801	0.0408907	0.415075	-0.717389	0.920946	0.988978	0.936999	-0.849743	0.797204	0.485215	1.018	-0.872195	0.0677526	0.25218	0.424223	-0.599468	0.894343	0.952459	0.872681	-0.75363	0.698653	0.237252	1.05973	-0.850013	-0.0314291	0.472378	0.388893	-0.538088	0.850382	0.925497	0.836607	-0.700912	0.635047
17	48	ER	0.13272	0.43943	-0.332345	0.418336	-0.286261	0.428407	-0.335175	-0.384332	-0.395709	0.428042	-0.381596	-0.328876	0.182124	0.445974	-0.292086	0.418502	-0.279865	0.416131	-0.337893	-0.386936	-0.392855	0.427257	-0.377228	-0.340493	0.163239	0.444754	-0.274753	0.40264	-0.28991	0.390042	-0.343408	-0.386807	-0.385827	0.410655	-0.348868	-0.256976	0.0947644	0.439523	-0.25369	0.326342	-0.308212	0.369187	-0.351451	-0.383021	-0.377837	0.395482	-0.322502
18	1	nucleoplasm	0.348795	0.982318	-0.450104	0.593734	-0.548184	0.80532	-0.826467	-1.04606	-0.990262	0.91499	-0.924215	-0.834211	-1.32869	0.958046	-0.408313	0.607392	-0.554015	0.772654	-0.795387	-1.01859	-0.964349	0.891799	-0.9133	-1.01999	-1.31701	0.947331	-0.442808	0.65404	-0.549274	0.783089	-0.778785	-1.00589	-0.957738	0.898516	-0.938085	-1.1376	-1.30718	0.947694	-0.501236	0.640591	-0.531556	0.808375	-0.764631	-1.0042	-0.962497	0.918207	-0.974325
18	2	structured cytoplasm	0.334285	-0.827265	-0.132454	0.477989	1.31076	-0.212322	1.46446	0.886787	0.694661	-0.406233	0.245271	-0.512737	1.12861	-0.701731	-0.066083	0.461418	1.06441	-0.229157	1.19431	0.796448	0.649533	-0.370553	0.300784	-0.405976	0.994609	-0.662623	0.0552525	0.4921	0.971038	-0.317849	1.10063	0.769114	0.661236	-0.433126	0.410915	-0.271308	0.901338	-0.656644	0.183845	0.502837	0.887117	-0.396533	1.02703	0.762431	0.678568	-0.491515	0.498838
18	3	nucleoli and cytoplasm	0.211503	-0.114685	-0.276476	0.529108	0.704581	0.168541	0.588883	0.232621	0.12887	0.0331569	-0.0575971	-0.474996	0.944621	-0.0494143	-0.176522	0.492649	0.646221	0.150185	0.480327	0.180555	0.103798	0.0653395	-0.0338783	-0.404382	0.837089	-0.0378754	-0.0354909	0.459327	0.575209	0.0608659	0.421628	0.169541	0.124333	0.00777117	0.0709934	-0.2166	0.720265	-0.0494792	0.174335	0.359994	0.536364	-0.0319638	0.390642	0.180592	0.157273	-0.0602167	0.180501
18	4	cytoskeleton	0.107379	-1.10093	0.725237	-0.673436	0.435598	-1.24	0.979903	1.19603	1.25449	-1.23281	1.31192	1.08959	0.916382	-1.07137	0.402325	-0.381971	0.4321	-1.0418	0.936606	1.1657	1.16346	-1.14655	1.16232	0.923303	1.01738	-1.05035	0.32072	-0.191836	0.369131	-0.93762	0.865224	1.13505	1.10382	-1.08382	1.08109	0.757992	1.073	-1.05472	0.368207	0.0195749	0.440499	-0.941838	0.900842	1.14605	1.11391	-1.0836	1.0954
18	5	cytoskeleton	0.263398	-0.505069	0.223774	-0.396012	0.147985	-0.495938	0.470736	0.591563	0.574514	-0.550468	0.610509	0.796391	0.555632	-0.57802	0.140444	-0.186287	0.183752	-0.503519	0.44293	0.634879	0.605119	-0.618814	0.650072	0.78643	0.623306	-0.608342	0.228559	-0.0303285	0.3549	-0.550643	0.51256	0.654477	0.62949	-0.668428	0.709569	0.797261	0.659126	-0.603299	0.288477	0.101467	0.353095	-0.552995	0.490176	0.634324	0.614826	-0.672836	0.717492
18	6	nucleoplasm	0.287076	0.524644	-0.354206	0.339967	-0.241644	0.450992	-0.512524	-0.57305	-0.558294	0.479924	-0.496531	-0.357747	-0.662708	0.474211	-0.326411	0.376961	-0.255922	0.410652	-0.513013	-0.559013	-0.537671	0.427433	-0.465239	-0.366799	-0.694019	0.463271	-0.34771	0.482971	-0.278768	0.418786	-0.515998	-0.557465	-0.536782	0.427011	-0.476594	-0.38117	-0.686504	0.460664	-0.365945	0.523963	-0.270337	0.443635	-0.510372	-0.557758	-0.541518	0.442002	-0.497951
18	7	structured cytoplasm	0.470629	0.449728	-0.220837	0.129997	-0.324642	0.352288	-0.464468	-0.452448	-0.425727	0.377436	-0.326553	0.211493	-0.39942	0.440891	-0.274873	0.316336	-0.29078	0.387353	-0.451557	-0.460672	-0.448161	0.387191	-0.372903	0.0352484	-0.370565	0.445852	-0.326587	0.493902	-0.260824	0.425437	-0.437528	-0.46923	-0.465901	0.416717	-0.420382	-0.123268	-0.344204	0.459242	-0.386737	0.616857	-0.223559	0.457173	-0.420089	-0.479179	-0.480345	0.445703	-0.458087
18	8	ER	0.0726298	0.623217	-0.426002	0.536646	-0.46611	0.650279	-0.566192	-0.619596	-0.634681	0.674241	-0.675141	-0.793447	-0.16491	0.630116	-0.372838	0.511018	-0.493495	0.602289	-0.565934	-0.622413	-0.622176	0.647523	-0.636764	-0.746438	-0.232389	0.626709	-0.382086	0.527072	-0.453693	0.572644	-0.541061	-0.615068	-0.608065	0.62033	-0.605185	-0.680958	-0.291194	0.624812	-0.412256	0.491234	-0.456989	0.562149	-0.536459	-0.611325	-0.602147	0.60996	-0.594176
18	9	plasma membrane	0.23773	-0.718168	-0.137942	0.433085	0.816297	-0.32144	1.11126	0.838802	0.714619	-0.541245	0.466199	-0.144081	1.2954	-0.584818	-0.142313	0.504585	0.81661	-0.120521	0.992723	0.727473	0.588142	-0.320097	0.273489	-0.418179	1.2681	-0.535832	-0.11922	0.603751	0.708744	-0.0848583	0.891872	0.674329	0.543119	-0.260912	0.24624	-0.578204	1.21991	-0.519383	-0.122641	0.715793	0.702749	-0.110454	0.863875	0.657929	0.541614	-0.275081	0.280216
18	10	nucleoplasm	0.14243	0.965514	-0.457214	0.62796	-0.465408	0.821245	-0.780664	-1.02202	-0.978197	0.923421	-0.9472	-1.08729	-1.21805	0.942865	-0.407556	0.612053	-0.512511	0.764797	-0.766071	-0.996955	-0.946731	0.881091	-0.901047	-1.03818	-1.26719	0.93234	-0.434468	0.624399	-0.531508	0.764702	-0.756884	-0.984545	-0.936667	0.879185	-0.910327	-1.01622	-1.28828	0.931905	-0.489927	0.569092	-0.539158	0.784979	-0.750764	-0.982267	-0.939431	0.895033	-0.940157
18	11	ER	0.388111	-0.901085	1.36069	-1.62212	-0.0637507	-1.24182	0.347155	0.894251	0.966965	-1.0882	1.19511	1.31727	0.0578585	-1.10956	1.24117	-1.64563	-0.0343113	-1.46107	0.46529	1.06397	1.16063	-1.29893	1.35249	1.37868	0.213953	-1.15715	0.929578	-1.48406	-0.12064	-1.46189	0.41812	1.07364	1.16531	-1.31957	1.31439	1.36738	0.350412	-1.18498	1.01257	-1.06168	-0.0427529	-1.49169	0.498745	1.11055	1.20296	-1.33253	1.32394
18	12	nucleoplasm and cytoplasm	0.128509	0.153614	-0.181117	0.292895	0.651037	0.111862	0.161641	-0.114011	-0.111157	0.0963416	-0.0551095	0.0550865	0.286795	0.165786	-0.198451	0.358818	0.792365	0.18205	0.162424	-0.144945	-0.15904	0.144667	-0.138437	-0.212948	0.332416	0.171368	-0.238528	0.515503	0.793364	0.236527	0.144643	-0.157969	-0.183181	0.18627	-0.199806	-0.454379	0.370085	0.178204	-0.339741	0.765057	0.780332	0.273805	0.127845	-0.16996	-0.201482	0.21379	-0.237194
18	13	ERGIC	0.189032	-0.476645	0.572808	-0.154924	0.922498	-0.565963	0.917981	0.616281	0.634061	-0.56326	0.678629	0.491829	0.75792	-0.456792	0.385886	-0.00395673	1.00703	-0.469787	0.905663	0.597624	0.587665	-0.506083	0.588651	0.283727	0.82955	-0.459997	0.459133	0.176504	1.05759	-0.465646	0.925217	0.605539	0.591624	-0.499813	0.591381	0.169544	0.852171	-0.462545	0.411569	0.367713	1.04755	-0.476537	0.897908	0.601577	0.590598	-0.509556	0.603601
18	14	ER	0.0515926	0.270651	-0.367737	0.484504	-0.26847	0.42143	-0.241543	-0.248082	-0.297984	0.374677	-0.383929	-0.546927	0.276445	0.306395	-0.304679	0.416689	-0.292787	0.388071	-0.272121	-0.276769	-0.304342	0.370369	-0.355877	-0.48471	0.193767	0.310936	-0.26667	0.353819	-0.281869	0.340897	-0.269392	-0.278383	-0.290763	0.336862	-0.303878	-0.38173	0.116631	0.307418	-0.230917	0.278693	-0.2826	0.307312	-0.272116	-0.275024	-0.279479	0.309945	-0.264434
18	15	ER	0.25416	0.693991	-0.418222	0.499974	-0.564861	0.646126	-0.638185	-0.688909	-0.684358	0.686835	-0.669972	-0.63698	-0.331189	0.684186	-0.358158	0.417265	-0.582087	0.58135	-0.628479	-0.673974	-0.653879	0.642259	-0.612106	-0.459024	-0.401513	0.677098	-0.355927	0.324602	-0.572031	0.557106	-0.615804	-0.665797	-0.640583	0.624396	-0.588754	-0.308925	-0.466458	0.670987	-0.368565	0.182215	-0.578818	0.553269	-0.613054	-0.659404	-0.634568	0.620844	-0.58408
18	16	structured cytoplasm	0.186443	-0.713181	0.529178	-0.689106	0.0444877	-0.843109	0.448799	0.796043	0.837476	-0.833511	0.923739	0.98603	0.660108	-0.741988	0.334838	-0.344046	0.191826	-0.763972	0.536127	0.832497	0.831904	-0.83151	0.876112	0.85942	0.786751	-0.741323	0.218441	-0.116056	0.164715	-0.68928	0.498198	0.819736	0.794458	-0.795725	0.811215	0.686749	0.862778	-0.738176	0.190605	0.120435	0.201989	-0.668073	0.515027	0.815733	0.785361	-0.782526	0.792813
18	17	nucleoli	0.262352	1.05574	-0.469734	0.324718	-0.997374	0.854274	-1.08939	-1.17169	-1.10213	0.974614	-1.01483	-0.269238	-2.27311	1.04612	-0.41434	-0.207721	-1.00916	0.814112	-1.04045	-1.14831	-1.07457	0.959879	-1.00351	-0.275837	-2.25134	1.03061	-0.442127	-1.31697	-1.00358	0.825574	-1.01576	-1.12967	-1.06393	0.965238	-1.03037	-0.0534521	-2.23537	1.02665	-0.485478	-2.64829	-1.00021	0.85578	-1.00039	-1.12247	-1.06609	0.985852	-1.07247
18	18	nucleoli	0.398387	-0.0874883	-0.364204	-0.412495	-0.901682	0.0928781	-0.753663	-0.107747	-0.124411	-0.059418	-0.0814411	0.565603	-0.26602	-0.0263861	-0.361342	-0.384264	-0.914958	0.186292	-0.750891	-0.187395	-0.212006	0.0373612	-0.180867	0.525383	-0.265566	0.00660688	-0.424732	-0.403249	-0.91366	0.255024	-0.7461	-0.218306	-0.250422	0.105169	-0.249528	0.447765	-0.224631	0.0592824	-0.516554	-0.422367	-0.909732	0.331404	-0.745245	-0.258141	-0.296132	0.192896	-0.326498
18	19	nucleoli	0.292024	1.08545	-0.469344	0.493058	-0.953651	0.874746	-1.07648	-1.19802	-1.12514	1.01104	-1.05413	-0.803158	-2.26263	1.04936	-0.410346	0.0759501	-0.970391	0.818896	-1.02776	-1.15315	-1.07915	0.965906	-1.01308	-0.513061	-2.27146	1.03417	-0.434501	-0.684323	-0.970113	0.83107	-1.00491	-1.13481	-1.06893	0.971815	-1.04139	-0.38072	-2.23916	1.03135	-0.470943	-1.67106	-0.96963	0.862286	-0.990575	-1.12909	-1.07235	0.993614	-1.08605
18	20	ER	0.0918241	-0.256096	0.398334	-0.697484	-0.234972	-0.351824	-0.0759772	0.286298	0.302116	-0.35165	0.430513	0.815527	0.176122	-0.34544	0.309051	-0.543788	-0.218323	-0.375952	-0.0524366	0.349437	0.347962	-0.417184	0.45424	0.733405	0.28821	-0.389867	0.26588	-0.345573	-0.18909	-0.394563	-0.0259552	0.382614	0.376465	-0.445725	0.465864	0.630009	0.376097	-0.397695	0.198635	-0.0953992	-0.176128	-0.389698	-0.021281	0.38286	0.374998	-0.440854	0.451382
18	21	nucleoplasm	0.343945	0.759247	-0.420966	0.62491	0.126099	0.734184	-0.385906	-0.759216	-0.758639	0.789102	-0.803983	-1.05286	-0.460735	0.756495	-0.337863	0.577848	-0.0409374	0.661172	-0.441391	-0.756923	-0.736609	0.741342	-0.729725	-0.875679	-0.577606	0.749399	-0.296726	0.560755	-0.0970052	0.636926	-0.45474	-0.74774	-0.720953	0.720326	-0.703011	-0.746332	-0.640067	0.745861	-0.255408	0.496285	-0.137088	0.633941	-0.464645	-0.742361	-0.715655	0.716629	-0.697909
18	22	uniform cytoplasm	0.425903	-0.436737	-0.213401	0.386857	0.200366	-0.131776	0.470162	0.494324	0.400346	-0.295887	0.244174	-0.111322	0.926427	-0.353338	-0.219668	0.433711	0.124355	-0.00795632	0.357558	0.423547	0.320879	-0.157113	0.122203	-0.277222	0.903709	-0.326043	-0.195847	0.498804	0.108496	-0.0229781	0.323349	0.398261	0.309625	-0.151662	0.145264	-0.318118	0.851186	-0.319306	-0.164614	0.495946	0.0567928	-0.067762	0.278767	0.386228	0.31399	-0.181367	0.196744
18	23	vesicles	0.482715	-0.0117376	-0.29911	-0.35153	-0.431931	0.179467	-0.375736	-0.103613	-0.130151	0.067245	-0.132539	0.204596	0.116312	-0.11294	-0.0907405	-0.151994	-0.259127	-0.114985	-0.112161	0.10391	0.106427	-0.130916	0.125413	0.152101	0.30331	-0.120103	-0.065539	-0.0311188	-0.216716	-0.150523	-0.0520366	0.129393	0.136087	-0.15214	0.158451	0.128407	0.325066	-0.11967	-0.121835	0.103743	-0.219815	-0.138057	-0.0523092	0.127433	0.130844	-0.149749	0.151176
18	24	mitochondria	0.404504	0.899375	-0.414037	0.479922	-0.563132	0.753107	-0.78208	-0.93419	-0.895268	0.84895	-0.840003	-0.660993	-1.04098	0.866917	-0.308406	0.136772	-0.632251	0.663555	-0.775529	-0.894105	-0.840363	0.780149	-0.750442	-0.201679	-1.13869	0.851534	-0.261777	-0.296095	-0.649758	0.65413	-0.766693	-0.87733	-0.825485	0.771882	-0.745789	0.0345017	-1.19247	0.841985	-0.253144	-0.620804	-0.666738	0.665704	-0.762663	-0.866129	-0.820016	0.778149	-0.76041
18	25	cytoskeleton	0.16021	0.152161	-0.363826	0.459618	-0.329568	0.361407	-0.231187	-0.153558	-0.211658	0.291456	-0.317416	-0.47428	0.369431	0.21235	-0.339217	0.484369	-0.334561	0.410534	-0.252045	-0.208003	-0.261321	0.371679	-0.382586	-0.643673	0.339986	0.224524	-0.357632	0.551866	-0.293018	0.400062	-0.230526	-0.211937	-0.258789	0.362639	-0.372207	-0.73222	0.306336	0.230503	-0.376442	0.565894	-0.252041	0.387568	-0.209644	-0.213781	-0.255132	0.351645	-0.355458
18	26	nucleoplasm	0.331465	-0.138145	-0.071605	-0.0983564	-0.145607	-0.232628	-0.145081	0.100545	0.111454	-0.22842	0.21815	0.445029	0.019839	-0.20036	-0.13579	-0.0201167	-0.174945	-0.21542	-0.189731	0.0913407	0.0995596	-0.264389	0.187793	0.3785	0.0371016	-0.206388	-0.164599	0.118746	-0.168556	-0.186563	-0.198389	0.0784194	0.0817175	-0.248397	0.154478	0.367859	0.0609116	-0.202585	-0.213647	0.276469	-0.184231	-0.134145	-0.214012	0.0637052	0.0601584	-0.215092	0.108599
18	27	nucleoli	0.170734	0.155849	-0.40134	0.336477	-0.682887	0.371624	-0.525604	-0.190786	-0.251599	0.284386	-0.335298	-0.361779	0.293867	0.196669	-0.357371	0.254569	-0.699521	0.370234	-0.534903	-0.232956	-0.275975	0.311766	-0.342111	-0.261379	0.198825	0.202014	-0.372066	0.161524	-0.682668	0.347093	-0.5218	-0.235886	-0.270481	0.292541	-0.312489	-0.161773	0.13979	0.202733	-0.385378	0.0337043	-0.648544	0.32271	-0.499288	-0.230961	-0.259141	0.267049	-0.273575
18	28	structured cytoplasm	0.381637	-0.324985	0.0470312	-0.157107	-0.0142223	-0.367814	0.16864	0.348976	0.356293	-0.37648	0.388977	0.464301	0.352589	-0.337991	-0.0307839	-0.0132335	0.031545	-0.292352	0.174081	0.351974	0.335456	-0.349187	0.332932	0.335893	0.428443	-0.331555	-0.0917194	0.168008	0.0103831	-0.242371	0.152755	0.335644	0.307799	-0.316694	0.285685	0.210269	0.463972	-0.323041	-0.169105	0.372619	-0.00190687	-0.206717	0.134755	0.318326	0.286072	-0.292439	0.250565
18	29	nucleoplasm and cytoplasm	0.677592	-1.9338	2.35838	-3.45236	0.0320828	-2.43664	0.780906	1.79875	1.91785	-2.20442	2.28579	2.35935	-0.0602416	-2.30983	2.59871	-3.8536	0.190577	-2.93864	1.12792	2.12249	2.31557	-2.60038	2.65175	2.5119	0.172889	-2.43365	2.40245	-3.65049	0.185857	-3.06319	1.21696	2.21952	2.42306	-2.6939	2.68402	2.54083	0.467558	-2.46286	2.0554	-2.77333	0.133372	-3.01386	1.20685	2.22261	2.4064	-2.66691	2.57994
18	30	mitochondria	0.273506	0.429598	-0.358051	0.177211	-0.667889	0.399231	-0.665164	-0.476016	-0.469914	0.392116	-0.404439	0.0120108	-0.513866	0.41217	-0.290826	-0.0727357	-0.716994	0.347878	-0.674451	-0.476074	-0.452882	0.344049	-0.349612	0.306458	-0.609095	0.409453	-0.277966	-0.284483	-0.704569	0.349672	-0.662916	-0.480029	-0.456387	0.347002	-0.349487	0.473415	-0.644493	0.402286	-0.224497	-0.459159	-0.650939	0.358025	-0.631465	-0.471181	-0.449827	0.356858	-0.350062
18	31	cytoskeleton	0.240458	-0.313302	-0.292519	0.474411	0.285076	0.0455934	0.459336	0.374662	0.269866	-0.125669	0.0660618	-0.339902	0.994609	-0.202704	-0.265919	0.495341	0.23486	0.169802	0.361494	0.27351	0.167784	0.0407444	-0.0625858	-0.519921	0.938922	-0.173714	-0.244076	0.551769	0.203031	0.161252	0.321935	0.246475	0.155313	0.0528568	-0.0473953	-0.582007	0.878187	-0.168437	-0.207036	0.565325	0.220187	0.113664	0.31564	0.243711	0.168859	0.0143679	0.0133834
18	32	focal	0.349608	-1.1424	0.713638	-1.79188	-0.299824	-1.33785	0.264056	1.10987	1.16912	-1.31434	1.35849	1.64399	0.375622	-1.29853	0.468525	-1.70086	-0.354753	-1.34803	0.252511	1.19229	1.2279	-1.44139	1.38849	1.70074	0.504283	-1.33862	0.603687	-1.73209	-0.255581	-1.35947	0.338969	1.23419	1.26527	-1.46717	1.42431	1.69041	0.648734	-1.36691	0.775934	-1.58782	-0.186196	-1.3427	0.388988	1.25698	1.28462	-1.46704	1.43023
18	33	nucleoli	0.108018	0.916036	-0.455362	0.552379	-0.763561	0.786023	-0.8695	-0.962266	-0.925334	0.877984	-0.887501	-0.894669	-1.04941	0.891616	-0.406716	0.477671	-0.787065	0.726263	-0.843081	-0.932487	-0.887517	0.833564	-0.839297	-0.772155	-1.09031	0.881649	-0.437198	0.369851	-0.78916	0.719783	-0.828516	-0.921645	-0.877512	0.827155	-0.841375	-0.677177	-1.13508	0.879814	-0.493129	0.197062	-0.789485	0.731816	-0.819251	-0.918187	-0.877705	0.835742	-0.859536
18	34	uniform cytoplasm	0.386559	-0.901235	-0.0076606	0.358901	1.12382	-0.607296	1.39706	1.03132	0.941616	-0.800021	0.732062	0.11443	1.29126	-0.763406	-0.0117853	0.407881	1.11547	-0.382402	1.26092	0.917806	0.803874	-0.585751	0.54638	-0.0813041	1.25788	-0.720137	0.14866	0.446813	1.17178	-0.397657	1.23962	0.88578	0.790517	-0.563615	0.586321	-0.0829208	1.19409	-0.716691	0.311576	0.478835	1.13974	-0.47196	1.18972	0.880875	0.81027	-0.606478	0.673348
18	35	uniform cytoplasm	0.320191	-0.73644	0.574583	-0.0243866	1.27313	-0.842759	1.34428	0.918824	0.952336	-0.844644	0.963387	0.658774	0.988779	-0.657243	0.349375	0.199189	1.53386	-0.6402	1.36682	0.861302	0.843576	-0.717375	0.801888	0.401552	1.06256	-0.634591	0.36676	0.370202	1.51563	-0.56283	1.31568	0.839493	0.80003	-0.661634	0.747394	0.213172	1.08567	-0.629729	0.375033	0.550072	1.49918	-0.558295	1.27955	0.831516	0.791849	-0.654594	0.745609
18	36	ER	0.128252	0.37328	-0.416108	0.602938	0.055282	0.585382	-0.14142	-0.323345	-0.399026	0.552011	-0.573578	-0.961923	0.484686	0.410786	-0.357159	0.592491	-0.0493728	0.522109	-0.211338	-0.360498	-0.405508	0.52431	-0.511209	-0.866306	0.354652	0.41616	-0.352438	0.638728	-0.0700738	0.471435	-0.225812	-0.363654	-0.390759	0.476749	-0.449032	-0.767115	0.261396	0.414215	-0.356189	0.630498	-0.0902459	0.438256	-0.237164	-0.361173	-0.379964	0.443979	-0.405994
18	37	nucleoli	0.44165	0.657914	-0.446918	0.390181	-0.797233	0.67195	-0.980623	-0.903746	-0.869973	0.668666	-0.80131	-0.18799	-1.88155	0.806659	-0.386252	0.0926087	-0.842799	0.718256	-0.95862	-0.970216	-0.923824	0.789873	-0.859649	-0.0669115	-1.88648	0.853987	-0.394048	-0.439121	-0.852302	0.762143	-0.944182	-0.991513	-0.948314	0.851861	-0.924481	-0.0998964	-1.84395	0.875966	-0.409678	-1.12116	-0.860012	0.808017	-0.934168	-1.0048	-0.968511	0.901104	-0.989817
18	38	mitochondria	0.24867	0.741252	-0.422054	0.4186	-0.719536	0.663894	-0.75212	-0.749986	-0.736163	0.718835	-0.698955	-0.506547	-0.516067	0.715956	-0.344067	0.163745	-0.738703	0.580714	-0.734817	-0.718356	-0.687218	0.653907	-0.615565	-0.15339	-0.610512	0.700091	-0.323381	-0.14624	-0.722914	0.55313	-0.715692	-0.701284	-0.667713	0.631184	-0.586599	0.101509	-0.684209	0.689365	-0.297127	-0.474256	-0.709936	0.546587	-0.702203	-0.689412	-0.658002	0.624764	-0.576253
18	39	Golgi	0.782463	0.47626	-0.380178	0.310275	-0.678226	0.465636	-0.629205	-0.483123	-0.482143	0.468165	-0.458674	-0.322154	-0.181304	0.486457	-0.37184	0.386222	-0.690513	0.498693	-0.617351	-0.492199	-0.499244	0.50353	-0.504706	-0.459385	-0.164416	0.490011	-0.433334	0.490056	-0.697411	0.522724	-0.613582	-0.496872	-0.508755	0.526425	-0.539038	-0.592144	-0.163964	0.493766	-0.513336	0.502077	-0.694381	0.538509	-0.60613	-0.500538	-0.513875	0.538116	-0.557448
18	40	nucleoli	0.255356	0.34741	-0.444843	0.0455118	-0.956832	0.496637	-0.993895	-0.64622	-0.63752	0.382758	-0.554061	0.685545	-1.57389	0.541082	-0.400619	-0.205337	-0.969376	0.572349	-0.970156	-0.767993	-0.745651	0.542605	-0.655754	0.712458	-1.61245	0.642052	-0.434464	-0.681665	-0.965066	0.644009	-0.957522	-0.825426	-0.802997	0.650765	-0.750132	0.631896	-1.58232	0.706381	-0.483172	-1.32196	-0.961996	0.710749	-0.948663	-0.863633	-0.845327	0.735192	-0.835705
18	41	Golgi	0.304401	-0.609403	0.0821006	-0.33983	-0.250441	-0.590566	0.126742	0.662865	0.64641	-0.667611	0.684851	0.819907	0.699358	-0.628942	-0.010315	-0.233004	-0.275952	-0.495259	0.0866064	0.658734	0.615079	-0.649822	0.626068	0.77553	0.747391	-0.623026	-0.0335258	-0.151919	-0.278752	-0.462737	0.069375	0.642759	0.594164	-0.630407	0.604336	0.709118	0.775568	-0.618207	-0.0458676	-0.0335108	-0.260435	-0.468688	0.0760723	0.634252	0.591441	-0.635886	0.618549
18	42	nucleoplasm and cytoplasm	0.230995	0.440528	-0.300558	0.323913	-0.333941	0.400329	-0.396273	-0.413036	-0.405918	0.413084	-0.367677	-0.163401	-0.0257039	0.457342	-0.312143	0.436108	-0.308723	0.452511	-0.38824	-0.429341	-0.435233	0.461073	-0.435065	-0.431889	0.0294786	0.461625	-0.359162	0.579005	-0.287341	0.478263	-0.377428	-0.43275	-0.444845	0.484259	-0.470462	-0.647799	0.0469427	0.468105	-0.450458	0.711902	-0.292842	0.495758	-0.380042	-0.440508	-0.454413	0.499422	-0.495346
18	43	mitochondria	0.405168	0.320314	-0.263987	0.127686	-0.543993	0.281763	-0.531577	-0.349842	-0.339091	0.279339	-0.28609	0.00149482	-0.37973	0.309896	-0.255888	0.15666	-0.543041	0.287317	-0.522183	-0.348107	-0.341728	0.272455	-0.290937	-0.0269437	-0.366224	0.311816	-0.277529	0.172743	-0.539848	0.299095	-0.517298	-0.353852	-0.349163	0.283186	-0.304199	-0.0308669	-0.372282	0.319285	-0.31659	0.180111	-0.537418	0.316904	-0.514725	-0.362464	-0.35939	0.301719	-0.322847
18	44	nucleoplasm and cytoplasm	0.233507	0.212472	-0.0617646	0.0765158	0.136938	0.0922301	-0.00881646	-0.141221	-0.104497	0.120619	-0.0125591	0.21542	0.253073	0.244546	-0.204615	0.356193	0.17595	0.206243	-0.0113367	-0.177951	-0.174183	0.192284	-0.134207	-0.136192	0.346595	0.241289	-0.137587	0.607633	0.674958	0.20029	0.233588	-0.137266	-0.140971	0.192526	-0.120006	-0.374514	0.427546	0.248666	-0.220261	0.811868	0.725944	0.239737	0.249752	-0.143007	-0.157782	0.222031	-0.165577
18	45	nucleoli and cytoplasm	0.30771	0.252563	-0.313726	0.418016	-0.191734	0.287957	-0.177237	-0.219059	-0.23256	0.253964	-0.246425	-0.33373	0.141902	0.290341	-0.30347	0.485524	-0.180419	0.357837	-0.185464	-0.251636	-0.277007	0.325544	-0.324053	-0.539277	0.149964	0.300951	-0.309392	0.560514	-0.173078	0.373831	-0.188813	-0.261172	-0.287614	0.348441	-0.341851	-0.638813	0.126479	0.304958	-0.354533	0.606384	-0.178292	0.368443	-0.196433	-0.266037	-0.28871	0.346653	-0.335766
18	47	structured cytoplasm	0.645335	-1.59742	0.433763	-1.67839	-0.434841	-1.51988	0.178631	1.3422	1.36768	-1.63048	1.44178	1.66672	0.473873	-1.63116	0.174721	-1.43775	-0.496396	-1.32802	0.122373	1.3084	1.2812	-1.56202	1.29118	1.60687	0.61848	-1.60439	0.0503497	-1.11951	-0.495711	-1.17668	0.112058	1.27305	1.20981	-1.45079	1.1544	1.42174	0.781236	-1.58234	-0.106691	-0.642578	-0.524712	-1.01998	0.0794336	1.23771	1.14545	-1.33823	1.01144
18	48	ER	0.0819471	0.0771558	-0.243114	0.0479753	-0.5195	0.114393	-0.344315	-0.0476004	-0.0654456	0.0671351	-0.0411229	0.175165	0.314323	0.0760447	-0.213364	-0.055204	-0.538906	0.105611	-0.354547	-0.0509805	-0.0670476	0.0516613	-0.0215598	0.298013	0.259852	0.0614283	-0.173395	-0.256509	-0.532046	0.0566083	-0.349838	-0.0404118	-0.0479005	0.0111821	0.0352277	0.465805	0.197804	0.0459821	-0.142479	-0.394663	-0.534545	0.0186455	-0.352125	-0.0319027	-0.0337	-0.0217454	0.0816573
19	1	nucleoplasm	0.269562	0.351745	-0.34331	0.569444	0.423489	0.415169	0.0962261	-0.282744	-0.313572	0.379769	-0.367669	-0.580758	0.240299	0.390527	-0.295081	0.587934	0.354493	0.460555	0.0255704	-0.321799	-0.35442	0.45082	-0.428793	-0.758668	0.21008	0.396404	-0.251867	0.643129	0.32583	0.455278	0.00331964	-0.326938	-0.353512	0.461463	-0.423473	-0.807519	0.158563	0.392406	-0.172324	0.616881	0.316614	0.431862	-0.00497938	-0.320009	-0.340413	0.442545	-0.389288
19	2	structured cytoplasm	0.198671	-0.295309	-0.315516	0.594584	1.27149	0.241419	1.04767	0.425058	0.248928	0.0532149	-0.1407	-0.757746	1.18046	-0.183232	-0.216367	0.587934	1.12946	0.188662	0.863191	0.322445	0.192404	0.0709261	-0.0728544	-0.70272	1.03359	-0.155758	-0.110174	0.647176	1.05013	0.0787073	0.790676	0.301076	0.217652	-0.014665	0.0571597	-0.562548	0.92306	-0.153431	0.00219293	0.677802	0.999693	-0.0110969	0.745337	0.29923	0.241937	-0.0828677	0.160899
19	3	nucleoli and cytoplasm	0.149258	0.035482	-0.360422	0.505914	-0.062782	0.32579	0.0679873	0.0174426	-0.0733761	0.213448	-0.248056	-0.585642	0.71574	0.106838	-0.31623	0.504683	-0.136346	0.363575	-0.0120968	-0.0492728	-0.126626	0.298399	-0.302138	-0.700951	0.648605	0.123687	-0.294881	0.529125	-0.126034	0.321729	-0.0172469	-0.0610036	-0.119355	0.267735	-0.250111	-0.688191	0.575869	0.125492	-0.268265	0.520372	-0.0901067	0.269147	-0.00781165	-0.059264	-0.102506	0.220856	-0.184453
19	4	cytoskeleton	0.285496	-1.23683	1.03264	-1.74797	0.153915	-1.40612	0.550227	1.12176	1.2054	-1.38667	1.37662	1.49625	0.253503	-1.36136	0.818323	-1.54348	0.463336	-1.46759	0.758807	1.23088	1.28967	-1.49395	1.42736	1.48138	0.423467	-1.41662	0.707008	-1.22141	0.602076	-1.4366	0.823815	1.2726	1.30274	-1.50803	1.39572	1.38679	0.593826	-1.41847	0.568004	-0.756402	0.575908	-1.34174	0.796808	1.25816	1.26338	-1.45596	1.30723
19	5	cytoskeleton	0.182789	-0.415994	-0.209788	0.330342	0.38736	-0.0875967	0.572014	0.451164	0.36012	-0.242377	0.16262	-0.238159	0.859338	-0.323753	-0.195842	0.368902	0.364119	0.0310068	0.483597	0.35574	0.262607	-0.0898867	0.0405977	-0.426097	0.816342	-0.293465	-0.191137	0.476095	0.333757	0.0411496	0.440272	0.322817	0.239855	-0.0648553	0.0353646	-0.529206	0.781306	-0.28406	-0.199395	0.587151	0.329336	0.0184813	0.421269	0.312539	0.241324	-0.0825621	0.0659587
19	6	nucleoplasm	0.1208	0.785701	-0.417463	0.605488	-0.0746933	0.702126	-0.471691	-0.788769	-0.769493	0.762308	-0.756261	-0.878924	-0.494002	0.782999	-0.35655	0.601074	-0.0766817	0.685032	-0.471873	-0.786435	-0.765295	0.763994	-0.759014	-1.01254	-0.521718	0.776501	-0.337707	0.638021	-0.0765088	0.682657	-0.467688	-0.777783	-0.757171	0.761974	-0.760183	-1.05148	-0.554621	0.775242	-0.335288	0.634684	-0.0850067	0.686685	-0.466446	-0.774039	-0.755075	0.763108	-0.763037
19	7	structured cytoplasm	0.184703	-0.714494	0.562003	-0.574041	0.165208	-0.867941	0.482642	0.784074	0.814399	-0.835006	0.904898	0.937598	0.564228	-0.781113	0.372142	-0.375644	0.236661	-0.834045	0.496357	0.831727	0.83692	-0.872844	0.88662	0.850286	0.684078	-0.786749	0.350607	-0.142618	0.317585	-0.799184	0.529482	0.835429	0.82859	-0.855572	0.854838	0.715983	0.758652	-0.788188	0.300076	0.115278	0.390151	-0.771705	0.555833	0.836194	0.824643	-0.841103	0.829483
19	8	ER	0.150595	0.188027	-0.31038	0.363671	-0.28539	0.282009	-0.239329	-0.149274	-0.186244	0.234367	-0.227472	-0.307723	0.375382	0.208733	-0.263587	0.325453	-0.300684	0.270375	-0.256192	-0.166732	-0.194269	0.235254	-0.215004	-0.276242	0.316166	0.205785	-0.226954	0.255828	-0.302147	0.223974	-0.261071	-0.164736	-0.180738	0.200584	-0.163697	-0.170508	0.241143	0.197042	-0.194859	0.176862	-0.307125	0.17753	-0.264147	-0.158179	-0.165478	0.164776	-0.112098
19	9	plasma membrane	0.0792313	-0.0398409	-0.376548	0.555199	0.0201014	0.347503	0.0554657	0.0461273	-0.0667652	0.22672	-0.31151	-0.756616	0.589906	0.0310944	-0.298528	0.574596	0.216275	0.32145	0.179102	0.0277338	-0.0617482	0.258836	-0.281307	-0.742169	0.514476	0.0518978	-0.274872	0.629188	0.161041	0.29909	0.135453	0.00912682	-0.0619291	0.252102	-0.250333	-0.722577	0.438404	0.0587802	-0.255815	0.636481	0.129969	0.262159	0.112336	0.00279634	-0.0547462	0.221737	-0.204072
19	10	nucleoplasm	0.168036	0.965584	-0.463715	0.630351	-0.556253	0.828789	-0.806157	-1.03148	-0.987778	0.930786	-0.96256	-1.16224	-1.32703	0.943569	-0.417633	0.621014	-0.596943	0.776283	-0.788556	-1.00615	-0.956956	0.893147	-0.923132	-1.17225	-1.36282	0.934036	-0.454723	0.646922	-0.606431	0.778997	-0.7771	-0.994907	-0.948806	0.892036	-0.936363	-1.20872	-1.37168	0.933571	-0.518223	0.620802	-0.605079	0.799553	-0.767373	-0.992053	-0.951256	0.906446	-0.965735
19	11	ER	0.0655713	0.048826	-0.264854	-0.286669	-0.587734	0.0717314	-0.43459	-0.0639888	-0.0727082	0.0145138	-0.00378722	0.393624	0.190255	-0.00637593	-0.179192	-0.190051	-0.525524	0.0028135	-0.348954	0.00117223	-0.00432004	-0.0535099	0.0693869	0.366892	0.26404	-0.000689203	-0.192386	-0.112885	-0.427804	0.00775371	-0.30189	-0.00344187	-0.0087424	-0.0515258	0.070042	0.373361	0.286653	0.00256169	-0.205838	-0.0343149	-0.393292	0.0251764	-0.291682	-0.00983394	-0.0163373	-0.0402009	0.0602636
[truncated: 1,305 more rows]
[truncated: 71 more columns]
